# Supplementary material
Source: MDPI journal article supplement (https://www.mdpi.com/2410-3888/8/4/203)
Supplement: s1 [file s1]

Archive with 2 entries (2 files):
- Supplementary Results File.csv
- Supplementary Tables and Figures.pdf
