# Supplementary material
Source: MDPI journal article supplement (https://www.mdpi.com/2410-3888/8/4/203)
Supplement: s1 [file s1 › Supplementary Results File.csv]

Gene #	Probe Name	One Way ANOVA		Two-way ANOVA (Race x Latitude)							EVE tests					Gene#	Probe Name	ANNOTATION ANNOTATION ANNOTATION ANNOTATION ANNOTATION ANNOTATION ANNOTATION ANNOTATION ANNOTATION ANNOTATION ANNOTATION ANNOTATION ANNOTATION ANNOTATION ANNOTATION ANNOTATION ANNOTATION ANNOTATION ANNOTATION ANNOTATION ANNOTATION ANNOTATION ANNOTATION ANNOTATION ANNOTATION ANNOTATION ANNOTATION ANNOTATION ANNOTATION ANNOTATION ANNOTATION ANNOTATION ANNOTATION ANNOTATION ANNOTATION ANNOTATION ANN…
		P Value	P (B-H)	P value (Race)	P-value (Latitude)	P-value (Interaction)	Sample Size	B-H (Race)	B-H (Latitude)	B-H (Interaction)	LRT	P-value (between locations)	B-H (between locations)	P-value (within locations)	B-H (within locations)			nr prot (Blast2GO)	nr prot (Blast2GO) GO	nr nucl (Blast2GO)	SwissProt (Blast2GO)	SwissProt (Blast2GO) GO	SwissProt (local)	Danio rerio v64	Homo sapiens ENSP	Xenopus tropicaliss ENSP	Gasterosteus aculeatus ENSP	Oryzias latipes ENSP	BLASTX_DanioRerio_ENS	Takifugu rubripes ENSP	Tetraodon nigroviridis ENSP	Bos Taurus ENSP	Mus musculus ENSP	Drosophila melanogaster ENSP	Ciona savigyi ENSP	C.elegans ENSP	C.intestinalis ENSP	Bos Taurus ENST	Bos Taurus ENST e-value	Homo sapiens ENST	Homo sapiens ENST e-value	Xenopus tropicalis ENST	Xenopus tropicalis ENST e-value	Gasterosteus aculeatus ENST	Gasterosteus aculeatus ENST e-value	Oryzias latipes ENST	Oryzias latipes ENST e-value	Danio rerio ENST	Danio rerio ENST e-value
1	new_rud_dec_c18152	0.4505027	6.75E-01	0.76431996	0.15584159	0.2397299	32	0.041959184	0.014907029	0.017714286	8.140245936374410E-04	0.9772386	8.86384E-06	0.0227614	0.095181681	gene1	new_rud_dec_c18152			spisula solidissima gene for zinc finger protein sso- complete cds
3	new_rud_dec_c26036	0.026948635	1.82E-01	0.2909216	0.49774376	0.003101263	32	0.0230839	0.031732426	0.000970522	9.707009530757200E-04	0.9751451	8.84485E-06	0.0248549	0.083048064	gene3	new_rud_dec_c26036			spisula solidissima gene for zinc finger protein sso- complete cds
4	AS_rud_dec_rep_c43978	0.29702914	5.61E-01	0.07353298	0.81716716	0.7674879	32	0.010562358	0.043727891	0.040512472	7.533979549521060E-04	0.9781023	8.87168E-06	0.0218977	0.100323503	gene4	AS_rud_dec_rep_c43978			venerupis decussatus partial srp54 gene for signal recognition particle 54-kda clone exons a-b
6	rud_dec_c38005	0.155251	4.15E-01	0.67560613	0.051847085	0.079706885	32	0.038938776	0.007564626	0.008798186	2.138262354278590E-01	0.6437848	5.83932E-06	0.3562152	0.47879041	gene6	rud_dec_c38005			venerupis decussatus partial srp54 gene for signal recognition particle 54-kda clone exons a-b
7	rud_dec_c10892	0.008240737	1.03E-01	0.00400398	0.6488162	0.009451736	32	0.002394558	0.037755102	0.002108844	2.605197645552260E-01	0.6097633	5.53073E-06	0.3902367	0.51478927	gene7	rud_dec_c10892	d-beta-hydroxybutyrate mitochondrial- partial			bdh_chick ame: full=d-beta-hydroxybutyrate mitochondrial short=bdh ame: full=3-hydroxybutyrate dehydrogenase flags: precursor	P:oxidation reduction, C:mitochondrion, F:binding, F:oxidoreductase activity, C:mitochondrial matrix, F:3hydroxybutyrate dehydrogenase activity, C:mitochondrial inner membrane	sp|Q5ZJZ5|BDH_CHICK	ENSDARP00000076934	ENSP00000376184	ENSXETP00000007484	ENSGACP00000004737	ENSORLP00000012481	ENSDARP00000076934	ENSTRUP00000045458	ENSTNIP00000015728	ENSBTAP00000000573	ENSMUSP00000110881	FBpp0087129	ENSCSAVP00000018557	F55E10.6
8	rud_dec2_c1248	0.36184463	6.13E-01	0.2955564	0.23557702	0.9939562	32	0.023269841	0.019401361	0.049709751	5.592503123352790E-05	0.9940332	9.01617E-06	0.0059668	0.386894332	gene8	rud_dec2_c1248
9	rud_dec2_c42	0.003711726	7.17E-02	0.21176937	0.00100708	0.8070586	32	0.018893424	0.000684807	0.042217687	4.810274609072390E+00	0.02829054	2.56604E-07	0.97170946	0.984662013	gene9	rud_dec2_c42	af484334_16nadh dehydrogenase subunit 5	C:cell part	venerupis philippinarum isolate f 1 16s ribosomal rna partial sequence nadh dehydrogenase subunit 4 gene trna- trna- and trna-ser complete sequence atp synthase subunit 6 nadh dehydrogenase subunit 3 and nadh dehydrogenase subunit 5 genes trna- trna- trna- trna- and trna-val complete sequence nadh dehydrogenase subunit 6 gene trna- trna- trna- trna- trna- trna- trna- trna- trna- trna- trna- and t…	nu5m_artsf ame: full=nadh-ubiquinone oxidoreductase chain 5 ame: full=nadh dehydrogenase subunit 5	C:membrane	sp|Q37710|NU5M_ARTSF	ENSDARP00000087879	ENSP00000354813		ENSGACP00000027670		ENSDARP00000087879	ENSTRUP00000047839	ENSTNIP00000002665	ENSBTAP00000053152	ENSMUSP00000081001	FBpp0100182		MTCE.35
10	rud_dec_c2709	0.55159634	7.40E-01	0.24378096	0.2879213	0.628416	32	0.020462585	0.022163265	0.034961451	1.629120404231790E-04	0.9898163	8.97793E-06	0.0101837	0.258057299	gene10	rud_dec_c2709	high density lipoprotein binding partial		strongylocentrotus purpuratus high density lipoprotein binding protein mrna	vigln_human ame: full=vigilin ame: full=high density lipoprotein-binding protein short=hdl-binding protein	C:cytoplasm, F:lipid binding, C:plasma membrane, F:protein binding, P:steroid metabolic process	sp|Q8VDJ3|VIGLN_MOUSE	ENSDARP00000109853	ENSP00000392265	ENSXETP00000026545	ENSGACP00000025587	ENSORLP00000008263	ENSDARP00000017412	ENSTRUP00000032657	ENSTNIP00000006806	ENSBTAP00000005656	ENSMUSP00000043047	FBpp0089201	ENSCSAVP00000016977	C08H9.2a	ENSCINP00000009467	ENSBTAT00000005656	9.00E-14	ENST00000447160	7.00E-30	ENSXETT00000026545	5.00E-42	ENSGACT00000006168	2.00E-20	ENSORLT00000008264	3.00E-24	ENSDART00000121511	1.00E-34
11	rud_dec_c33422	0.5873207	7.63E-01	0.6113991	0.48827168	0.47516885	32	0.036693878	0.031319728	0.028580499	6.218131669584180E-04	0.9801059	8.88985E-06	0.0198941	0.115235241	gene11	rud_dec_c33422	nucleoporin 54-like		callithrix jacchus nucleoporin p54- transcript variant 2 mrna	nup54_human ame: full=nucleoporin p54 ame: full=54 kda nucleoporin	C:cytoplasm, C:nucleoplasm, C:nuclear envelope, P:transport, P:macromolecule localization, C:membrane	sp|Q7Z3B4|NUP54_HUMAN		ENSP00000406103	ENSXETP00000052046	ENSGACP00000021524	ENSORLP00000008129		ENSTRUP00000036378	ENSTNIP00000010348	ENSBTAP00000014548	ENSMUSP00000046540	FBpp0087063	ENSCSAVP00000017784	K07F5.13b.1		ENSBTAT00000014548	6.00E-25	ENST00000458189	6.00E-27	ENSXETT00000052045	1.00E-14	ENSGACT00000021565	5.00E-25
13	AS_rud_dec2_rep_c3331	0.16773452	4.32E-01	0.03992605	0.8724885	0.30818313	32	0.00769161	0.045569161	0.021020408	9.872678716646980E-04	0.9749339	8.84294E-06	0.0250661	0.081940575	gene13	AS_rud_dec2_rep_c3331	cd63 antigen isoform 1	C:platelet dense granule membrane, C:endosome membrane, C:plasma membrane		cd63_human ame: full=cd63 antigen ame: full=granulophysin ame: full=lysosomal-associated membrane protein 3 short=lamp-3 ame: full=melanoma-associated antigen me491 ame: full=oma81h ame: full=ocular melanoma-associated antigen ame: full=tetraspanin-30 short=tspan-30 ame: cd_antigen=cd63	C:platelet dense granule membrane, C:endosome membrane, C:plasma membrane	sp|P41731|CD63_MOUSE	ENSDARP00000031764	ENSP00000257857	ENSXETP00000037999	ENSGACP00000007123	ENSORLP00000008141	ENSDARP00000031764	ENSTRUP00000039740	ENSTNIP00000015482	ENSBTAP00000015829	ENSMUSP00000026407	FBpp0087248	ENSCSAVP00000008844	T23D8.2	ENSCINP00000012935									ENSORLT00000019089	1.00E-05
14	rud_dec_c25048	0.83735114	9.02E-01	0.3729031	0.89123905	0.91974455	32	0.027061224	0.046294785	0.046811791	1.423781837559090E-03	0.9699005	8.79728E-06	0.0300995	0.062778957	gene14	rud_dec_c25048	med22 protein	C:mediator complex, P:regulation of transcription from RNA polymerase II promoter, F:protein binding, F:RNA polymerase II transcription mediator activity	meleagris gallopavo mediator of rna polymerase ii transcription subunit 22- transcript variant 2 mrna	med22_bovin ame: full=mediator of rna polymerase ii transcription subunit 22 ame: full=mediator complex subunit 22 ame: full=surfeit locus protein 5	C:mediator complex, P:regulation of transcription from RNA polymerase II promoter, F:protein binding, F:RNA polymerase II transcription mediator activity	sp|Q800L3|MED22_CHICK	ENSDARP00000011330	ENSP00000420815	ENSXETP00000010946	ENSGACP00000014565	ENSORLP00000014210	ENSDARP00000011330	ENSTRUP00000007223	ENSTNIP00000005569	ENSBTAP00000015357	ENSMUSP00000015920	FBpp0070160		ZK970.3	ENSCINP00000001602	ENSBTAT00000015357	5.00E-25							ENSORLT00000014211	1.00E-13	ENSDART00000014347	4.00E-23
15	rud_dec2_c1804	0.57452977	7.55E-01	0.8906466	0.1842998	0.43746454	32	0.046394558	0.016639456	0.02692517	6.676451856719720E-04	0.9793859	8.88332E-06	0.0206141	0.109244819	gene15	rud_dec2_c1804			venerupis decussatus epic-pcr fragment clone c9
16	rud_dec_c1278	0.09659445	3.36E-01	0.05072272	0.25543907	0.89359415	32	0.008693878	0.020358277	0.045773243	2.148773331100520E-03	0.9630274	8.73494E-06	0.0369726	0.060092741	gene16	rud_dec_c1278	glyoxylase. putative [Ixodes scapularis]	F:hydroxyacylglutathione hydrolase activity	pediculus humanus corporis ethe1 mrna	ethe1_mouse ame: full=protein mitochondrial ame: full=ethylmalonic encephalopathy protein 1 homolog ame: full=hepatoma subtracted clone one protein flags: precursor		sp|Q9DCM0|ETHE1_MOUSE	ENSDARP00000043402	ENSP00000292147	ENSXETP00000054333	ENSGACP00000016597	ENSORLP00000019059	ENSDARP00000043402	ENSTRUP00000024091	ENSTNIP00000007684	ENSBTAP00000005747	ENSMUSP00000076433	FBpp0288428	ENSCSAVP00000016338	C33A12.7	ENSCINP00000029583					ENSXETT00000054333	3.00E-14			ENSORLT00000019060	4.00E-18	ENSDART00000043403	6.00E-20
19	rud_dec_c19273	0.46882415	6.87E-01	0.20605573	0.39617	0.8949207	32	0.018575964	0.027315193	0.045827664	1.573666330614280E-04	0.9899911	8.97951E-06	0.0100089	0.263942834	gene19	rud_dec_c19273	neuroglian [Manduca sexta]			nrg_drome ame: full=neuroglian flags: precursor		sp|P20241|NRG_DROME	ENSDARP00000103349	ENSP00000380628	ENSXETP00000034441	ENSGACP00000024962	ENSORLP00000009141	ENSDARP00000103349	ENSTRUP00000026969	ENSTNIP00000001168	ENSBTAP00000032011	ENSMUSP00000032163	FBpp0071154		C18F3.2a	ENSCINP00000014525
20	new_rud_dec_c33761	0.22038165	4.89E-01	0.3886137	0.113165215	0.3956156	32	0.027723356	0.01214059	0.025151927	4.150819305030830E+00	0.04161438	3.77455E-07	0.95838562	0.976456668	gene20	new_rud_dec_c33761			brassica rapa pekinensis clone complete sequence
21	rud_dec_c5335	0.4583019	6.80E-01	0.5800785	0.20722473	0.7171213	32	0.03553288	0.017823129	0.038503401	3.823116168746300E-04	0.9844001	8.9288E-06	0.0155999	0.16100908	gene21	rud_dec_c5335	sphingomyelin acid-like isoform cra_b	P:metabolic process, P:sphingomyelin catabolic process, C:extracellular space, F:hydrolase activity. acting on glycosyl bonds, C:extracellular region, F:protein binding		asm3a_rat ame: full=acid sphingomyelinase-like phosphodiesterase 3a short=asm-like phosphodiesterase 3a flags: precursor	P:metabolic process, P:sphingomyelin catabolic process, C:extracellular space, F:hydrolase activity. acting on glycosyl bonds, C:extracellular region, F:protein binding	sp|Q641Z7|ASM3A_RAT	ENSDARP00000116492	ENSP00000357425	ENSXETP00000050330		ENSORLP00000013508				ENSBTAP00000028765	ENSMUSP00000020022		ENSCSAVP00000011559
23	AS_rud_dec_c8720	0.12801829	3.81E-01	0.025234573	0.9071604	0.90672714	32	0.005936508	0.046798186	0.046276644	1.105102146425450E-03	0.9734807	8.82976E-06	0.0265193	0.074762722	gene23	AS_rud_dec_c8720			venerupis decussatus partial srp54 gene for signal recognition particle 54-kda clone exons a-b
24	AS_rud_dec_c5878	0.08856585	3.20E-01	0.38893116	0.012796093	0.46738905	32	0.027736961	0.003170068	0.028231293	2.628147973362040E+00	0.1049841	9.52237E-07	0.8950159	0.936741385	gene24	AS_rud_dec_c5878	gaba receptor-associated protein		haliotis diversicolor gaba receptor-associated protein complete cds	gbrap_rat ame: full=gamma-aminobutyric acid receptor-associated protein ame: full=gaba receptor-associated protein	F:GABA receptor binding, F:microtubule binding, C:lysosome, C:microtubule associated complex, C:autophagic vacuole membrane, C:microtubule, C:Golgi membrane, P:microtubule cytoskeleton organization, P:protein targeting, P:synaptic transmission, C:actin cytoskeleton, F:betatubulin binding, C:smooth endoplasmic reticulum, C:plasma membrane	sp|P60517|GBRAP_RAT	ENSDARP00000068351	ENSP00000306866	ENSXETP00000035464	ENSGACP00000025635	ENSORLP00000007791	ENSDARP00000068351	ENSTRUP00000029313	ENSTNIP00000011130	ENSBTAP00000019814	ENSMUSP00000018711	FBpp0071427	ENSCSAVP00000008559	C32D5.9.2	ENSCINP00000023257	ENSBTAT00000019814	5.00E-58	ENST00000302386	3.00E-57	ENSXETT00000035464	2.00E-57	ENSGACT00000025686	1.00E-72	ENSORLT00000007792	2.00E-63	ENSDART00000073861	3.00E-76
25	rud_dec_c18746	0.5125493	7.15E-01	0.33552983	0.29456222	0.21589975	32	0.02523356	0.02244898	0.016453515	1.295553597287830E-03	0.9712873	8.80986E-06	0.0287127	0.06646369	gene25	rud_dec_c18746	PREDICTED: hypothetical protein LOC100151502 [Danio rerio]			pol4_drome ame: full=retrovirus-related pol polyprotein from transposon 412 includes: ame: full=protease includes: ame: full=reverse transcriptase includes: ame: full=endonuclease		sp|P10394|POL4_DROME	ENSDARP00000105592							ENSTNIP00000001050
26	rud_dec2_c1480	0.8545451	9.12E-01	0.5463051	0.5620823	0.9379527	32	0.034272109	0.034494331	0.04752381	1.305602861634720E-03	0.9711762	8.80885E-06	0.0288238	0.066303161	gene26	rud_dec2_c1480	big defensin 2			bdef_brabe ame: full=big defensin ame: full=defensin flags: precursor	P:response to other organism, P:defense response	sp|Q86QN6|BDEF_BRABE
27	rud_dec_rep_c44521	0.027460704	1.84E-01	0.057233196	0.006472176	0.16179827	32	0.009328798	0.002049887	0.013637188	7.613322501418900E-01	0.3829119	3.47312E-06	0.6170881	0.72765962	gene27	rud_dec_rep_c44521	ribosomal protein l	C:ribosome, F:structural constituent of ribosome, P:translation	argopecten irradians isolate iolsaicl63ct83cn90 ribosomal protein l complete cds	rl8_danre ame: full=60s ribosomal protein l8		sp|Q6P0V6|RL8_DANRE	ENSDARP00000005651	ENSP00000262584	ENSXETP00000033787	ENSGACP00000002659	ENSORLP00000013387	ENSDARP00000005651	ENSTRUP00000035727	ENSTNIP00000007964	ENSBTAP00000037200	ENSMUSP00000004072	FBpp0072802	ENSCSAVP00000005248	B0250.1.1		ENSBTAT00000037367	3.00E-83	ENST00000528957	1.00E-82	ENSXETT00000033787	7.00E-128	ENSGACT00000002668	4.00E-106	ENSORLT00000013388	2.00E-95	ENSDART00000006948	3.00E-111
28	rud_dec_c2323	0.82298833	8.95E-01	0.9620271	0.3907376	0.5561136	32	0.04877551	0.02706576	0.032131519	1.116216988179980E-03	0.9733478	8.82855E-06	0.0266522	0.074207426	gene28	rud_dec_c2323	conserved plasmodium protein			mybx_dicdi ame: full=myb-like protein x		sp|Q54J55|MYBX_DICDI	ENSDARP00000010777			ENSGACP00000023638		ENSDARP00000098814	ENSTRUP00000030583				FBpp0074389
29	newAS_rud_dec_c23627	0.81365746	8.89E-01	0.60716605	0.73618186	0.62304175	32	0.036521542	0.0409161	0.034793651	1.045990691841320E-02	0.9185394	8.33142E-06	0.0814606	0.128534239	gene29	newAS_rud_dec_c23627			venerupis pullastra satellite vpu202m sequence
30	AS_rud_dec_c24787	0.21945529	4.88E-01	0.63687176	0.07401311	0.30802804	32	0.037609977	0.009292517	0.021002268	4.814469455141070E-04	0.9824943	8.91151E-06	0.0175057	0.138923924	gene30	AS_rud_dec_c24787	uncharacterized protein kiaa0528 homolog		oryctolagus cuniculus synaptotagmin vii alpha- transcript variant 5 mrna	k0528_xentr ame: full=uncharacterized protein kiaa0528 homolog		sp|Q28BX9|K0528_XENTR	ENSDARP00000115392	ENSP00000379345		ENSGACP00000017131	ENSORLP00000011373	ENSDARP00000098594	ENSTRUP00000038179	ENSTNIP00000022411	ENSBTAP00000002207	ENSMUSP00000065522	FBpp0271831			ENSCINP00000014804			ENST00000396028	5.00E-08
32	rud_dec2_c3101	0.80774045	8.86E-01	0.7619867	0.47773612	0.3849514	32	0.041873016	0.030929705	0.02462585	1.155601452296650E-03	0.9728818	8.82432E-06	0.0271182	0.072238743	gene32	rud_dec2_c3101	tpa_inf: protein-sorting related protein		osmerus mordax clone omor-eva-519-063 charged multivesicular body protein 6 complete cds	chm6a_xenla ame: full=charged multivesicular body protein 6-a ame: full=chromatin-modifying protein 6-a	C:membrane, C:endosome, P:transport	sp|Q6GMA4|CHM6A_XENLA	ENSDARP00000012210	ENSP00000317468	ENSXETP00000029394	ENSGACP00000018967	ENSORLP00000025673	ENSDARP00000012210	ENSTRUP00000014398	ENSTNIP00000014841	ENSBTAP00000018623	ENSMUSP00000026434	FBpp0071767	ENSCSAVP00000006937	Y65B4A.3	ENSCINP00000026802					ENSXETT00000029394	3.00E-17	ENSGACT00000019005	7.00E-06
33	AS_rud_dec_rep_c43187	0.13266091	3.87E-01	0.20902583	0.7507609	0.14200626	32	0.018752834	0.041428571	0.012517007	3.065623858674370E-03	0.9558452	8.6698E-06	0.0441548	0.071084907	gene33	AS_rud_dec_rep_c43187	cytochrome b-c1 complex subunit 8			qcr8_ailme ame: full=cytochrome b-c1 complex subunit 8 ame: full=complex iii subunit 8 ame: full=complex iii subunit viii ame: full=ubiquinol-cytochrome c reductase complex kda protein ame: full=ubiquinol-cytochrome c reductase complex ubiquinone-binding protein qp-c	F:ubiquinolcytochromec reductase activity, C:mitochondrion, P:electron transport chain, C:membrane, C:mitochondrial inner membrane, C:respiratory chain, P:transport	sp|Q9CQ69|QCR8_MOUSE	ENSDARP00000039787	ENSP00000367934	ENSXETP00000056840	ENSGACP00000024035	ENSORLP00000007354	ENSDARP00000039787	ENSTRUP00000015954	ENSTNIP00000004471	ENSBTAP00000012477	ENSMUSP00000104649	FBpp0291672		F45H10.2.2
34	rud_dec_c18713	0.7098534	8.28E-01	0.84225196	0.56128114	0.45496446	32	0.044816327	0.03445805	0.027678005	1.484471609046520E-03	0.969266	8.79153E-06	0.030734	0.061440131	gene34	rud_dec_c18713	uncharacterized protein c19orf29 homolog		saccoglossus kowalevskii hcg23632-like miscrna	cs029_human ame: full=uncharacterized protein c19orf29 ame: full=cactin ame: full=renal carcinoma antigen ny-ren-24	F:protein binding, C:nucleus, P:RNA processing	sp|Q9CS00|CS029_MOUSE	ENSDARP00000078145	ENSP00000248420	ENSXETP00000047821	ENSGACP00000020211	ENSORLP00000018764		ENSTRUP00000016569	ENSTNIP00000018396	ENSBTAP00000013697	ENSMUSP00000059533	FBpp0076997	ENSCSAVP00000005405	W03H9.4	ENSCINP00000009819
35	AS_rud_dec_c7119	0.15717335	4.18E-01	0.51073927	0.22748806	0.027479334	32	0.032693878	0.018993197	0.004453515	3.370368632298260E+00	0.0663789	6.02076E-07	0.9336211	0.960726791	gene35	AS_rud_dec_c7119	AGAP002908-PB [Anopheles gambiae str. PEST]		alvinella pompejana u2 small nuclear ribonucleoprotein auxiliary factor large subunit complete cds	u2af2_drome ame: full=splicing factor u2af 50 kda subunit ame: full=u2 auxiliary factor 50 kda subunit ame: full=u2 snrnp auxiliary factor large subunit	F:polypyrimidine tract binding, F:mRNA binding, P:nuclear export, C:precatalytic spliceosome, C:U2 snRNP, P:regulation of alternative nuclear mRNA splicing. via spliceosome, P:spliceosome assembly, P:mitotic spindle organization, F:nucleotide binding, F:protein heterodimerization activity	sp|Q24562|U2AF2_DROME	ENSDARP00000023679	ENSP00000307863	ENSXETP00000041471	ENSGACP00000019133	ENSORLP00000014464	ENSDARP00000023679	ENSTRUP00000016892	ENSTNIP00000014196	ENSBTAP00000003664	ENSMUSP00000131458	FBpp0074013	ENSCSAVP00000011612	Y92C3B.2b.1	ENSCINP00000007109					ENSXETT00000041471	9.00E-08
36	rud_dec_c20267	0.6753209	8.09E-01	0.43289313	0.59566224	0.59719765	32	0.029505669	0.03585034	0.033800454	1.781021402962320E-04	0.9893522	8.97372E-06	0.0106478	0.244013928	gene36	rud_dec_c20267			venerupis decussatus epic-pcr fragment clone c7
37	AS_rud_dec_c45557	0.4905429	7.01E-01	0.19565062	0.93187976	0.33284244	32	0.01800907	0.047619048	0.02214059	1.496920549186590E-03	0.9691375	8.79036E-06	0.0308625	0.06109866	gene37	AS_rud_dec_c45557													ENSTRUP00000039045
38	AS_rud_dec_c20019	0.10018416	3.41E-01	0.030717248	0.58968073	0.07005155	32	0.006693878	0.035637188	0.00814966	1.606428948207390E-03	0.9680291	8.78031E-06	0.0319709	0.058501864	gene38	AS_rud_dec_c20019			schistosoma mansoni genome sequence supercontig smp_scaff000423
40	rud_dec_c40793	0.78435135	8.73E-01	0.773534	0.3709324	0.83142215	32	0.042294785	0.026122449	0.04323356	7.430900243434730E-04	0.9782526	8.87304E-06	0.0217474	0.101706233	gene40	rud_dec_c40793	PREDICTED: similar to rhotekin. partial [Strongylocentrotus purpuratus]			rtkn_rat ame: full=rhotekin	P:regulation of cellular process, P:signaling, F:Rho GTPase binding	sp|Q6V7V2|RTKN_RAT	ENSDARP00000069502	ENSP00000377552	ENSXETP00000031934	ENSGACP00000013988	ENSORLP00000003621	ENSDARP00000069502	ENSTRUP00000001974	ENSTNIP00000012784	ENSBTAP00000000619	ENSMUSP00000085249
41	rud_dec_c3484	0.005066807	8.28E-02	0.000993953	0.8913869	0.78541374	32	0.00124263	0.046303855	0.041328798	4.751037893129250E-04	0.98261	8.91256E-06	0.01739	0.140226752	gene41	rud_dec_c3484	hypothetical protein TRIADDRAFT_25185 [Trichoplax adhaerens]	P:oxidation reduction, F:binding, F:oxidoreductase activity, P:metabolic process, F:catalytic activity		dhrs9_bovin ame: full=dehydrogenase reductase sdr family member 9 ame: full=3-alpha hydroxysteroid dehydrogenase short=3-alpha-hsd ame: full=short-chain dehydrogenase reductase retsdr8 flags: precursor	F:oxidoreductase activity, P:metabolic process, C:cytoplasm	sp|Q8HYR6|DHRS9_BOVIN	ENSDARP00000077357	ENSP00000376184	ENSXETP00000054550	ENSGACP00000013729	ENSORLP00000023325	ENSDARP00000077357	ENSTRUP00000033733	ENSTNIP00000013357	ENSBTAP00000005986	ENSMUSP00000119164	FBpp0071131	ENSCSAVP00000012672	K08F4.9.1	ENSCINP00000027653
42	rud_dec2_c1244	0.46559492	6.86E-01	0.82811946	0.87470376	0.18431549	32	0.044276644	0.04568254	0.014852608	2.481031592651560E-04	0.9874328	8.95631E-06	0.0125672	0.202526675	gene42	rud_dec2_c1244			venerupis decussatus partial srp54 gene for signal recognition particle 54-kda clone exons a-b
43	rud_dec_c14995	4.03E-04	2.34E-02	0.09369755	0.04536585	0.00776984	32	0.011873016	0.007002268	0.001877551	2.137440201904490E+00	0.1437416	1.30378E-06	0.8562584	0.910528299	gene43	rud_dec_c14995																				ENSCINP00000024381
44	rud_dec_rep_c28833	0.6462925	7.94E-01	0.64252555	0.88639	0.26105723	32	0.037836735	0.046090703	0.018870748	8.097306984495840E-04	0.9772986	8.86439E-06	0.0227014	0.095510508	gene44	rud_dec_rep_c28833			venerupis decussatus epic-pcr fragment clone c11
46	rud_dec_c2245	0.97345424	9.82E-01	0.9886629	0.7483308	0.6969266	32	0.049673469	0.041333333	0.037628118	1.427449330378740E-03	0.9698618	8.79693E-06	0.0301382	0.062658125	gene46	rud_dec_c2245	retrotransposon ty3-gypsy subclass			rtf23_schpo ame: full=retrotransposable element tf2 155 kda protein type 3	F:RNA binding, P:proteolysis, P:DNA integration, P:RNAdependent DNA replication, F:aspartictype endopeptidase activity, C:nucleus, F:RNAdirected DNA polymerase activity, F:DNA binding	sp|Q9UR07|RTF23_SCHPO	ENSDARP00000110119		ENSXETP00000031337	ENSGACP00000024172	ENSORLP00000017538		ENSTRUP00000008238	ENSTNIP00000009609						ENSCINP00000000875
47	AS_rud_dec_c31033	0.5667219	7.50E-01	0.58912265	0.32687727	0.19987942	32	0.035854875	0.023918367	0.015578231	8.125927271294130E-04	0.9772586	8.86402E-06	0.0227414	0.0952064	gene47	AS_rud_dec_c31033	hypothetical protein Kpol_1059p40 [Vanderwaltozyma polyspora DSM 70294]	F:aminoacyltRNA ligase activity, P:tRNA aminoacylation for protein translation, F:nucleotide binding	Vanderwaltozyma polyspora DSM 70294 hypothetical protein (Kpol_1059p40) partial mRNA	syrc_yeast ame: full=arginyl-trna cytoplasmic ame: full=arginine--trna ligase short=		sp|Q05506|SYRC_YEAST	ENSDARP00000095377	ENSP00000376591	ENSXETP00000042857	ENSGACP00000010895	ENSORLP00000014323	ENSDARP00000095377	ENSTRUP00000045604	ENSTNIP00000019504	ENSBTAP00000022568	ENSMUSP00000029968	FBpp0081249	ENSCSAVP00000014510	F26F4.10b.2		ENSBTAT00000022568	9.00E-16	ENST00000369523	2.00E-20	ENSXETT00000042857	5.00E-18	ENSGACT00000010918	7.00E-29	ENSORLT00000014324	4.00E-25
48	rud_dec_c8464	0.009724687	1.10E-01	0.004849736	0.1790815	0.74938583	32	0.002589569	0.01631746	0.039723356	3.809979106400190E+00	0.05094809	4.62114E-07	0.94905191	0.970355181	gene48	rud_dec_c8464	band 7 protein aael010189-like		hydra magnipapillata protein mrna	sto2_caeel ame: full=stomatin-2		sp|Q19958|STO2_CAEEL	ENSDARP00000074080	ENSP00000286713	ENSXETP00000034943	ENSGACP00000023978	ENSORLP00000015481	ENSDARP00000074080	ENSTRUP00000028968	ENSTNIP00000012854	ENSBTAP00000023931	ENSMUSP00000028241	FBpp0290317	ENSCSAVP00000001641	F32A6.5d	ENSCINP00000014068	ENSBTAT00000052503	6.00E-16			ENSXETT00000034943	1.00E-30	ENSGACT00000027295	3.00E-32	ENSORLT00000005959	1.00E-29	ENSDART00000080505	4.00E-34
50	rud_dec_c1590	8.50E-04	3.25E-02	0.000471726	0.002643023	0.10700992	32	0.000848073	0.001219955	0.010471655	9.708974929651500E-03	0.9215082	8.35835E-06	0.0784918	0.124027396	gene50	rud_dec_c1590	cysteine and glycine-rich protein 1	F:metal ion binding, F:zinc ion binding		csrp3_rat ame: full=cysteine and glycine-rich protein 3 ame: full=cysteine-rich protein 3 short=crp3 ame: full=lim domain cardiac ame: full=muscle lim protein	P:cellular process, P:regulation of biological quality, F:binding, P:muscle organ development, C:cytoplasm, C:nucleus	sp|P50463|CSRP3_RAT	ENSDARP00000124015	ENSP00000265968	ENSXETP00000009659	ENSGACP00000012822	ENSORLP00000010408	ENSDARP00000002532	ENSTRUP00000003704	ENSTNIP00000012491	ENSBTAP00000030304	ENSMUSP00000032658	FBpp0081134		T04C9.4a.2								ENSGACT00000012846	6.00E-09	ENSORLT00000010409	1.00E-11
52	rud_dec2_c863	0.031969804	1.98E-01	0.012211359	0.9158105	0.41459578	32	0.004108844	0.047056689	0.025977324	1.071677920942870E-01	0.7433919	6.74278E-06	0.2566081	0.363946357	gene52	rud_dec2_c863	40s ribosomal protein s9	F:structural constituent of ribosome, C:small ribosomal subunit, P:translation, F:rRNA binding	corbicula fluminea 40s ribosomal protein s9 complete cds	rs9_human ame: full=40s ribosomal protein s9	C:nucleolus, F:translation regulator activity, P:positive regulation of cell proliferation, F:structural constituent of ribosome, F:protein binding, C:cytosolic small ribosomal subunit, F:rRNA binding, P:translational elongation	sp|P29314|RS9_RAT	ENSDARP00000108965	ENSP00000375633	ENSXETP00000019794	ENSGACP00000015117	ENSORLP00000014111	ENSDARP00000102240	ENSTRUP00000040636	ENSTNIP00000010912	ENSBTAP00000008502	ENSMUSP00000104265	FBpp0076152	ENSCSAVP00000006103	F40F8.10.2	ENSCINP00000008737	ENSBTAT00000008502	9.00E-75	ENST00000391753	2.00E-73	ENSXETT00000019794	3.00E-93	ENSGACT00000015145	2.00E-95	ENSORLT00000014112	1.00E-103	ENSDART00000129698	6.00E-112
53	AS_rud_dec_rep_c44677	0.60321736	7.73E-01	0.37882036	0.6950962	0.39053544	32	0.027333333	0.039405896	0.024875283	1.718507472787670E-04	0.9895407	8.97543E-06	0.0104593	0.251731144	gene53	AS_rud_dec_rep_c44677	tumor necrosis factor member 11	F:tumor necrosis factor receptor binding, C:membrane, P:immune response							ENSXETP00000038009
54	AS_rud_dec2_rep_c3471	0.23880555	5.07E-01	0.10295372	0.12270793	0.29669824	32	0.012571429	0.012843537	0.020471655	1.060888059669190E-03	0.9740165	8.83462E-06	0.0259835	0.07743069	gene54	AS_rud_dec2_rep_c3471	PREDICTED: hypothetical protein [Strongylocentrotus purpuratus]			rdh14_human ame: full=retinol dehydrogenase 14 ame: full=alcohol dehydrogenase pan2	C:endoplasmic reticulum	sp|Q9HBH5|RDH14_HUMAN	ENSDARP00000105391	ENSP00000370648	ENSXETP00000033984	ENSGACP00000021736	ENSORLP00000016004	ENSDARP00000057420	ENSTRUP00000028223	ENSTNIP00000015071	ENSBTAP00000006933	ENSMUSP00000020947	FBpp0087997	ENSCSAVP00000013563	C01G8.3	ENSCINP00000010791
55	rud_dec_c35901	0.41189644	6.51E-01	0.40509143	0.39488024	0.3222463	32	0.028453515	0.027256236	0.021723356	3.563458257191310E-01	0.5505427	4.99358E-06	0.4494573	0.575687639	gene55	rud_dec_c35901			Dictyostelium discoideum AX4 hypothetical protein (bud32) mRNA. complete cds	prpk_mouse ame: full=tp53-regulating kinase ame: full=nori-2 ame: full=p53-related protein kinase	P:biological_process, F:protein serine/threonine kinase activity, C:nucleus	sp|Q99PW4|PRPK_MOUSE	ENSDARP00000106473	ENSP00000361186	ENSXETP00000007506	ENSGACP00000015101	ENSORLP00000024972		ENSTRUP00000007046	ENSTNIP00000006404	ENSBTAP00000038979	ENSMUSP00000045141	FBpp0076883	ENSCSAVP00000005270	F52C12.6
56	rud_dec_c28416	0.38024873	6.27E-01	0.33272627	0.40450233	0.354735	32	0.025097506	0.02770068	0.023201814	5.771093309724610E-01	0.4474476	4.05848E-06	0.5525524	0.672272087	gene56	rud_dec_c28416	PREDICTED: similar to dynactin [Nasonia vitripennis]		apis mellifera dynactin subunit 1 mrna	dctn1_chick ame: full=dynactin subunit 1 ame: full=150 kda dynein-associated polypeptide ame: full=dap-150 short=dp-150 ame: full=p150-glued	C:dynein complex, C:cytoplasm, C:microtubule, F:motor activity, C:cell leading edge, F:protein binding	sp|P35458|DCTN1_CHICK	ENSDARP00000003613	ENSP00000377571	ENSXETP00000025729	ENSGACP00000026300	ENSORLP00000022760	ENSDARP00000093184	ENSTRUP00000013979	ENSTNIP00000009823	ENSBTAP00000006431	ENSMUSP00000109552	FBpp0075498		ZK593.5b										ENSORLT00000022761	3.00E-25	ENSDART00000102411	3.00E-16
57	rud_dec_c3375	0.009297942	1.08E-01	0.001272732	0.120367065	0.46286947	32	0.001378685	0.012648526	0.028058957	1.313392427408640E+00	0.2517814	2.28373E-06	0.7482186	0.832167655	gene57	rud_dec_c3375	predicted protein [Nematostella vectensis]								ENSXETP00000039005
59	rud_dec_c34536	0.58606166	7.63E-01	0.57186466	0.3043385	0.7307582	32	0.035260771	0.022943311	0.039011338	1.367171581705400E-03	0.9705047	8.80276E-06	0.0294953	0.064394274	gene59	rud_dec_c34536	PREDICTED: hypothetical protein [Hydra magnipapillata]																	ENSCSAVP00000019860	C18C4.5a
61	newAS_rud_dec_c28904	0.74553	8.49E-01	0.7356861	0.40744483	0.54299027	32	0.040870748	0.027818594	0.031641723	5.312752306281250E-04	0.9816109	8.9035E-06	0.0183891	0.12960553	gene61	newAS_rud_dec_c28904
62	rud_dec2_rep_c3433	0.15670067	4.17E-01	0.06629359	0.68546784	0.18512037	32	0.010027211	0.039129252	0.014897959	5.559545724054260E-04	0.9811887	8.89967E-06	0.0188113	0.125594767	gene62	rud_dec2_rep_c3433	h2av_strpu ame: full=histone ame: full= z	C:nucleosome, F:DNA binding, P:nucleosome assembly, C:nucleus	haliotis discus discus histone h2a isoform 2 complete cds	h2av_strpu ame: full=histone ame: full= z	C:nucleosome, F:DNA binding, P:nucleosome assembly, C:nucleus	sp|P08991|H2AV_STRPU	ENSDARP00000062323	ENSP00000296417	ENSXETP00000002709	ENSGACP00000019299	ENSORLP00000015256	ENSDARP00000090434	ENSTRUP00000040984	ENSTNIP00000005766	ENSBTAP00000005802	ENSMUSP00000036907	FBpp0084434	ENSCSAVP00000015497	R08C7.3.3	ENSCINP00000011952	ENSBTAT00000022576	1.00E-73	ENST00000308153	3.00E-71	ENSXETT00000002709	1.00E-78	ENSGACT00000019337	1.00E-67	ENSORLT00000015257	9.00E-61	ENSDART00000099660	2.00E-85
63	newAS_rud_dec_c25506	0.5362686	7.31E-01	0.59053516	0.93572164	0.26155773	32	0.035918367	0.047777778	0.018893424	5.009234763804210E-04	0.9821438	8.90833E-06	0.0178562	0.13481431	gene63	newAS_rud_dec_c25506			dicentrarchus labrax chromosome sequence corresponding to linkage group top complete sequence
64	rud_dec2_c1118	0.06393046	2.71E-01	0.6753111	0.08100709	0.013542315	32	0.0389161	0.009854875	0.002721088	5.641444743105230E-04	0.9810506	8.89842E-06	0.0189494	0.124185039	gene64	rud_dec2_c1118			saccoglossus kowalevskii transient receptor potential channel-like partial mrna
66	rud_dec_c39509	0.8363203	9.02E-01	0.51573294	0.5127866	0.49745592	32	0.03293424	0.032344671	0.029596372	1.244116524844680E-03	0.9718628	8.81508E-06	0.0281372	0.068151254	gene66	rud_dec_c39509																	FBpp0112314
67	AS_rud_dec_c12939	0.053163506	2.49E-01	0.034130547	0.30194926	0.4458164	32	0.007111111	0.022793651	0.027306122	6.175333602959650E-01	0.4319654	3.91805E-06	0.5680346	0.686261003	gene67	AS_rud_dec_c12939	mgc68953 partial			vma5a_human ame: full=von willebrand factor a domain-containing protein 5a ame: full=breast cancer suppressor candidate 1 short=bcsc-1 ame: full=loss of heterozygosity 11 chromosomal region 2 gene a protein		sp|O00534|VMA5A_HUMAN	ENSDARP00000034864	ENSP00000353485	ENSXETP00000030964	ENSGACP00000008284	ENSORLP00000017676	ENSDARP00000034864	ENSTRUP00000046023	ENSTNIP00000007785	ENSBTAP00000035522	ENSMUSP00000083212				ENSCINP00000012041
68	rud_dec_c14491	0.6441721	7.92E-01	0.3881564	0.2997831	0.85666335	32	0.027709751	0.022693878	0.04414966	1.076787107365360E-03	0.9738226	8.83286E-06	0.0261774	0.076417765	gene68	rud_dec_c14491	uncharacterized transposon-derived
69	rud_dec_c14780	0.6252756	7.82E-01	0.25875244	0.7006481	0.7553762	32	0.021310658	0.039578231	0.04	1.127744818660400E-03	0.9732105	8.82731E-06	0.0267895	0.073567678	gene69	rud_dec_c14780	4f2 cell-surface antigen heavy chain	P:carbohydrate metabolic process, F:cation binding, F:catalytic activity	gasterosteus aculeatus clone cgx60-a08 mrna sequence	4f2_mouse ame: full=4f2 cell-surface antigen heavy chain short=4f2hc ame: cd_antigen=cd98	F:protein binding, P:transport	sp|P10852|4F2_MOUSE	ENSDARP00000052916	ENSP00000340815	ENSXETP00000042158	ENSGACP00000026093	ENSORLP00000006766	ENSDARP00000052916	ENSTRUP00000039775	ENSTNIP00000015997	ENSBTAP00000030057	ENSMUSP00000010239											ENSGACT00000026144	4.00E-108	ENSORLT00000006767	7.00E-54
70	AS_rud_dec2_c383	0.7735043	8.66E-01	0.37601623	0.7554187	0.8509053	32	0.027210884	0.041591837	0.043963719	1.407681472130660E-03	0.9700711	8.79883E-06	0.0299289	0.063212544	gene70	AS_rud_dec2_c383	unnamed protein product [Tetraodon nigroviridis]			ngap_human ame: full=ras gtpase-activating protein ngap ame: full=ras protein activator-like 2	P:regulation of small GTPase mediated signal transduction, P:signal transduction, F:Ras GTPase activator activity, C:intracellular	sp|Q9UJF2|NGAP_HUMAN	ENSDARP00000101195	ENSP00000407768	ENSXETP00000001461	ENSGACP00000021005	ENSORLP00000009212	ENSDARP00000101195	ENSTRUP00000008117	ENSTNIP00000005365	ENSBTAP00000020658	ENSMUSP00000077423	FBpp0291973	ENSCSAVP00000010693	F58G4.1	ENSCINP00000026108
71	newAS_rud_dec_c17935	0.35663027	6.09E-01	0.31576508	0.19574437	0.12965034	32	0.024272109	0.01724263	0.011818594	6.634556676928010E-01	0.4153426	3.76728E-06	0.5846574	0.701576151	gene71	newAS_rud_dec_c17935			spisula solidissima complete sequence
72	AS_rud_dec_rep_c28953	0.6910819	8.20E-01	0.49156904	0.42766812	0.81163603	32	0.031927438	0.028675737	0.042426304	8.898757403699160E-04	0.976202	8.85444E-06	0.023798	0.088713343	gene72	AS_rud_dec_rep_c28953	lmp x	C:cytoplasm, C:proteasome core complex, C:nucleus, F:threoninetype endopeptidase activity, P:proteolysis involved in cellular protein catabolic process	saccoglossus kowalevskii proteasome beta 5 subunit-like mrna	psb5_rat ame: full=proteasome subunit beta type-5 ame: full=macropain epsilon chain ame: full=multicatalytic endopeptidase complex epsilon chain ame: full=proteasome chain 6 ame: full=proteasome epsilon chain ame: full=proteasome subunit x flags: precursor		sp|P28075|PSB5_RAT	ENSDARP00000099755	ENSP00000334973	ENSXETP00000048982	ENSGACP00000018806	ENSORLP00000023913	ENSDARP00000056553	ENSTRUP00000004583	ENSTNIP00000010770	ENSBTAP00000016918	ENSMUSP00000022803	FBpp0087320	ENSCSAVP00000018960	K05C4.1.1	ENSCINP00000018314			ENST00000334454	9.00E-06	ENSXETT00000048982	3.00E-16					ENSDART00000113111	6.00E-09
73	new_rud_dec_c1122	0.021960087	1.65E-01	0.90143245	0.10635548	0.041168924	32	0.04675737	0.011673469	0.005922902	2.179221188881790E+00	0.1398852	1.2688E-06	0.8601148	0.912428586	gene73	new_rud_dec_c1122			venerupis decussatus epic-pcr fragment clone c9
75	rud_dec_c35853	0.6823215	8.14E-01	0.38267264	0.71293753	0.50341445	32	0.027492063	0.040013605	0.029873016	1.245164344879860E-03	0.971851	8.81498E-06	0.028149	0.068119962	gene75	rud_dec_c35853	predicted protein [Nematostella vectensis]		nematostella vectensis protein partial mrna	ccdc6_human ame: full=coiled-coil domain-containing protein 6 ame: full=papillary thyroid carcinoma-encoded protein ame: full=protein h4	C:cytoskeleton, C:cytoplasm, F:SH3 domain binding, F:structural constituent of cytoskeleton	sp|Q16204|CCDC6_HUMAN	ENSDARP00000063612	ENSP00000378750	ENSXETP00000006760	ENSGACP00000013159	ENSORLP00000006747	ENSDARP00000063612	ENSTRUP00000022690	ENSTNIP00000020159	ENSBTAP00000004143	ENSMUSP00000123374	FBpp0075053	ENSCSAVP00000019094			ENSBTAT00000004143	7.00E-29	ENST00000395341	2.00E-32			ENSGACT00000013184	5.00E-24	ENSORLT00000006748	2.00E-35	ENSDART00000063613	1.00E-22
76	rud_dec_c2856	0.074925855	2.95E-01	0.095576726	0.5395783	0.059096947	32	0.012013605	0.033519274	0.007297052	9.654728445968880E-02	0.756013	6.85726E-06	0.243987	0.348467051	gene76	rud_dec_c2856	mitochondrial nadh dehydrogenase iron-sulfur protein 6			ndus6_gorgo ame: full=nadh dehydrogenase iron-sulfur protein mitochondrial ame: full=complex i-13kd-a short=ci-13kd-a ame: full=nadh-ubiquinone oxidoreductase 13 kda-a subunit flags: precursor	C:membrane	sp|Q0MQH5|NDUS6_PONPY	ENSDARP00000073559	ENSP00000274137	ENSXETP00000019508	ENSGACP00000011903		ENSDARP00000073559		ENSTNIP00000012129	ENSBTAP00000013078	ENSMUSP00000022097	FBpp0078662	ENSCSAVP00000006260	F22D6.4.1	ENSCINP00000000023
77	AS_rud_dec_c35016	0.83865875	9.03E-01	0.7077233	0.37617442	0.6990289	32	0.039954649	0.026430839	0.037723356	1.775900097868540E-03	0.966386	8.76541E-06	0.033614	0.056846751	gene77	AS_rud_dec_c35016
78	new_rud_dec_c19777	0.26459488	5.32E-01	0.09056027	0.584556	0.13738684	32	0.011696145	0.035451247	0.012294785	6.583147037417800E-04	0.9795304	8.88463E-06	0.0204696	0.10995926	gene78	new_rud_dec_c19777
79	rud_dec_c21697	0.9736325	9.82E-01	0.7689104	0.8047524	0.8756403	32	0.042104308	0.043283447	0.044984127	1.651536670522090E-03	0.9675836	8.77627E-06	0.0324164	0.057829095	gene79	rud_dec_c21697			spisula solidissima cnrna86 123 complete sequence
80	rud_dec_c12003	0.097850785	3.37E-01	0.33018282	0.109587535	0.3058208	32	0.024970522	0.011868481	0.020907029	4.653577331134780E-02	0.8292048	7.52113E-06	0.1707952	0.253900943	gene80	rud_dec_c12003	ammonium transporter 2			amt1_caeel ame: full= ammonium transporter 1	C:integral to membrane, C:membrane, P:transmembrane transport, F:ammonium transmembrane transporter activity	sp|P54145|AMT1_CAEEL											FBpp0112150	ENSCSAVP00000008989	C05E11.5	ENSCINP00000012012
82	rud_dec_c210	0.60312676	7.73E-01	0.5035371	0.86447394	0.2564389	32	0.032371882	0.045306122	0.018612245	1.217062747628000E-03	0.9721703	8.81787E-06	0.0278297	0.069419955	gene82	rud_dec_c210			venerupis decussatus partial srp54 gene for signal recognition particle 54-kda clone exons a-b
83	AS_rud_dec_c30063	0.57679164	7.56E-01	0.896755	0.17000964	0.72304535	32	0.046603175	0.015723356	0.038721088	8.611533623934510E-04	0.9765891	8.85795E-06	0.0234109	0.09054679	gene83	AS_rud_dec_c30063
88	new_rud_dec_c4996	0.69231313	8.21E-01	0.38897443	0.6764292	0.69059116	32	0.027746032	0.03875737	0.037356009	1.324204867296430E-02	0.9083864	8.23933E-06	0.0916136	0.143445556	gene88	new_rud_dec_c4996																															ENSDART00000102096	1.00E-05
90	rud_dec_c39842	0.033023264	2.01E-01	0.006865237	0.11187321	0.08573654	32	0.003079365	0.012018141	0.009179138	6.323846537270580E-05	0.9936551	9.01274E-06	0.0063449	0.372020387	gene90	rud_dec_c39842	pak-interacting exchange factor beta-like		xenopus tropicalis rho guanine nucleotide exchange factor 7 miscrna	arhg7_rat ame: full=rho guanine nucleotide exchange factor 7 ame: full=beta-pix ame: full=pak-interacting exchange factor beta	P:positive regulation of apoptosis, P:small GTPase mediated signal transduction, P:astrocyte cell migration, F:guanylnucleotide exchange factor activity, C:focal adhesion, F:protein binding, C:growth cone, C:cytoplasm	sp|O55043|ARHG7_RAT	ENSDARP00000045092	ENSP00000364889	ENSXETP00000018011	ENSGACP00000003790	ENSORLP00000015214	ENSDARP00000042085	ENSTRUP00000036976	ENSTNIP00000016872	ENSBTAP00000027619	ENSMUSP00000106536							ENST00000375737	8.00E-07	ENSXETT00000018010	7.00E-11	ENSGACT00000019643	3.00E-09
91	rud_dec_c1944	0.19576739	4.65E-01	0.20923854	0.63431007	0.23706917	32	0.01876644	0.037219955	0.017560091	2.115339011652390E-04	0.9883958	8.96504E-06	0.0116042	0.226796271	gene91	rud_dec_c1944	hypothetical protein BRAFLDRAFT_88522 [Branchiostoma floridae]	F:polysaccharide binding, F:scavenger receptor activity, P:immune response		endua_danre ame: full=poly -specific endoribonuclease-a ame: full=protein endou-a ame: full=uridylate-specific endoribonuclease-a flags: precursor		sp|A1L237|ENDUA_DANRE	ENSDARP00000104110	ENSP00000397679	ENSXETP00000009350	ENSGACP00000000906	ENSORLP00000024892	ENSDARP00000064903	ENSTRUP00000022537	ENSTNIP00000017606	ENSBTAP00000043168	ENSMUSP00000097820	FBpp0073243		M60.2.1
92	rud_dec_c1609	0.48013762	6.93E-01	0.5980397	0.124494486	0.5281547	32	0.036222222	0.012984127	0.031011338	8.467551853641450E-04	0.9767856	8.85973E-06	0.0232144	0.092180235	gene92	rud_dec_c1609	selenoprotein h	F:selenium binding		selh_mouse ame: full=selenoprotein h short=		sp|Q3UQA7|SELH_MOUSE	ENSDARP00000122778	ENSP00000434875							ENSBTAP00000053708	ENSMUSP00000099706	FBpp0073637
93	AS_rud_dec_c22857	0.36425376	6.14E-01	0.33317322	0.24929577	0.6878838	32	0.025120181	0.020027211	0.037260771	8.835770815949210E-04	0.9762864	8.85521E-06	0.0237136	0.089182877	gene93	AS_rud_dec_c22857	low quality protein: von willebrand factor type egf and pentraxin domain-containing protein 1-like			svep1_rat ame: full= von willebrand factor type egf and pentraxin domain-containing protein 1 flags: precursor	C:cytoplasm, F:calcium ion binding, P:cell adhesion, C:membrane, F:chromatin binding, C:extracellular region, F:protein binding	sp|P0C6B8|SVEP1_RAT	ENSDARP00000071352	ENSP00000304118	ENSXETP00000005597	ENSGACP00000025329	ENSORLP00000009462	ENSDARP00000071352	ENSTRUP00000006105	ENSTNIP00000016855	ENSBTAP00000001939	ENSMUSP00000045856	FBpp0288558	ENSCSAVP00000010107	W02C12.1	ENSCINP00000003398
95	AS_rud_dec_c12091	0.1325478	3.87E-01	0.03690571	0.12907888	0.432609	32	0.007401361	0.013306122	0.026716553	6.877919646310030E-01	0.4069164	3.69085E-06	0.5930836	0.708601834	gene95	AS_rud_dec_c12091	spectrin beta chain		pediculus humanus corporis spectrin beta mrna	sptcb_drome ame: full=spectrin beta chain		sp|Q00963|SPTCB_DROME	ENSDARP00000113965	ENSP00000334156	ENSXETP00000005472	ENSGACP00000026308	ENSORLP00000025871	ENSDARP00000093138	ENSTRUP00000030658	ENSTNIP00000009968	ENSBTAP00000009208	ENSMUSP00000011877	FBpp0074228	ENSCSAVP00000019464	K11C4.3a	ENSCINP00000018190	ENSBTAT00000006213	2.00E-06	ENST00000496323	1.00E-09	ENSXETT00000005472	2.00E-18					ENSDART00000145147	2.00E-08
96	rud_dec_c25331	0.11598885	3.64E-01	0.038745698	0.7925713	0.5557255	32	0.007596372	0.04292517	0.032113379	2.031071543342470E-04	0.9886293	8.96716E-06	0.0113707	0.232109678	gene96	rud_dec_c25331																		ENSCSAVP00000019972
97	rud_dec_rep_c19018	0.3109695	5.71E-01	0.08332495	0.7713948	0.8857199	32	0.011219955	0.042145125	0.045455782	7.999176152679860E-04	0.9774366	8.86564E-06	0.0225634	0.096215226	gene97	rud_dec_rep_c19018			gasterosteus aculeatus clone vmrc28- complete sequence																				ENST00000375078	1.00E-09
98	rud_dec_c32247	0.47773284	6.92E-01	0.72459257	0.5569359	0.121979915	32	0.040444444	0.034294785	0.011337868	4.088152237720800E-01	0.5225715	4.73988E-06	0.4774285	0.603243278	gene98	rud_dec_c32247	zygote arrest 1			zar1_xenla ame: full=zygote arrest protein 1 ame: full=oocyte-specific maternal effect factor	C:cytoplasm, P:multicellular organismal development	sp|Q7T3U0|ZAR1_XENLA	ENSDARP00000022641	ENSP00000329803	ENSXETP00000021637	ENSGACP00000018707	ENSORLP00000000308	ENSDARP00000022641	ENSTRUP00000037446	ENSTNIP00000020817	ENSBTAP00000043902	ENSMUSP00000073221
99	AS_rud_dec_rep_c32610	0.22552365	4.94E-01	0.15833893	0.10328582	0.8750282	32	0.015945578	0.011482993	0.044943311	1.089827265786880E-03	0.9736646	8.83142E-06	0.0263354	0.075597686	gene99	AS_rud_dec_rep_c32610			venerupis decussatus partial srp54 gene for signal recognition particle 54-kda clone exons a-b
100	rud_dec_c45484	0.003078027	6.39E-02	0.000701145	0.021433117	0.26759246	32	0.001034014	0.004417234	0.01921542	1.589168833442040E-01	0.6901557	6.25992E-06	0.3098443	0.42724715	gene100	rud_dec_c45484	cytochrome c oxidase subunit iii		paphia euglypta complete genome	cox3_spofr ame: full=cytochrome c oxidase subunit 3 ame: full=cytochrome c oxidase polypeptide iii	P:oxidation reduction, C:membrane	sp|P26858|COX3_MARPO	ENSDARP00000087875	ENSP00000354982		ENSGACP00000027666		ENSDARP00000087875	ENSTRUP00000047835	ENSTNIP00000023047	ENSBTAP00000053157	ENSMUSP00000080997	FBpp0100180		MTCE.23
101	rud_dec_c41993	0.20492096	4.75E-01	0.07629291	0.6725249	0.5853423	32	0.010752834	0.038612245	0.033310658	6.569551424604460E-04	0.9795516	8.88482E-06	0.0204484	0.110006205	gene101	rud_dec_c41993			pediculus humanus corporis vesicle-trafficking protein mrna				ENSDARP00000011605		ENSXETP00000054708	ENSGACP00000016443	ENSORLP00000005146	ENSDARP00000011605	ENSTRUP00000045546	ENSTNIP00000009416	ENSBTAP00000010141	ENSMUSP00000113502	FBpp0070136														ENSDART00000003686	1.00E-06
103	newAS_rud_dec_c30675	0.13873167	3.94E-01	0.5530233	0.050262064	0.061996702	32	0.034494331	0.007455782	0.007546485	2.514026551484670E-01	0.6160892	5.58811E-06	0.3839108	0.508635667	gene103	newAS_rud_dec_c30675			ruditapes philippinarum srp54 intron isolate ai16
104	newAS_rud_dec_c13197	0.036231246	2.09E-01	0.28277087	0.008054891	0.03908507	32	0.022643991	0.002376417	0.005668934	1.686396766824310E+00	0.1940766	1.76033E-06	0.8059234	0.875413248	gene104	newAS_rud_dec_c13197			venerupis decussatus epic-pcr fragment clone 6d
107	rud_dec_rep_c23387	0.9694077	9.80E-01	0.703045	0.8941587	0.80200005	32	0.039814059	0.046399093	0.042027211	8.479665028175980E-04	0.976769	8.85958E-06	0.023231	0.0920803	gene107	rud_dec_rep_c23387			venerupis decussatus partial srp54 gene for signal recognition particle 54-kda clone exons a-b
108	AS_rud_dec_rep_c14714	0.030493759	1.94E-01	0.10579309	0.005233582	0.16377828	32	0.012789116	0.001868481	0.013786848	1.597657303793760E-01	0.6893723	6.25281E-06	0.3106277	0.428166705	gene108	AS_rud_dec_rep_c14714						sp|Q7Z8P9|NDK_ASPFU		ENSP00000312446	ENSXETP00000024764	ENSGACP00000020117	ENSORLP00000018429		ENSTRUP00000014521	ENSTNIP00000005730	ENSBTAP00000041066		FBpp0085223	ENSCSAVP00000014938		ENSCINP00000011619
110	rud_dec2_c2724	0.058401536	2.59E-01	0.16076203	0.23055208	0.08981472	32	0.016095238	0.019183673	0.009419501	2.268679053760820E-01	0.633856	5.74926E-06	0.366144	0.489094197	gene110	rud_dec2_c2724
112	AS_rud_dec_c33370	0.088894755	3.21E-01	0.27292362	0.53272927	0.013201288	32	0.022090703	0.033201814	0.002671202	9.607899019670180E-04	0.9752722	8.84601E-06	0.0247278	0.083688836	gene112	AS_rud_dec_c33370			spisula solidissima cnrna86 123 complete sequence
113	rud_dec2_c1476	0.8185022	8.93E-01	0.9747975	0.5251657	0.40699112	32	0.04922449	0.032852608	0.025678005	7.529773247370030E-04	0.9781085	8.87173E-06	0.0218915	0.100378538	gene113	rud_dec2_c1476			venerupis decussatus partial srp54 gene for signal recognition particle 54-kda clone exons a-b
114	AS_rud_dec_c22351	0.51651084	7.18E-01	0.17748244	0.56937903	0.9706988	32	0.017024943	0.034816327	0.048793651	1.580154110399680E-03	0.9682915	8.78269E-06	0.0317085	0.059130908	gene114	AS_rud_dec_c22351	unnamed protein product [Oikopleura dioica]						ENSDARP00000017613	ENSP00000421986		ENSGACP00000027466	ENSORLP00000018410	ENSDARP00000091892	ENSTRUP00000006929	ENSTNIP00000019280	ENSBTAP00000020278			ENSCSAVP00000016438	K09C8.5
115	AS_rud_dec2_rep_c3681	0.01363552	1.30E-01	0.019238172	0.17753324	0.21453393	32	0.005133787	0.016199546	0.016367347	3.159245917984200E-01	0.5740672	5.20696E-06	0.4259328	0.551516182	gene115	AS_rud_dec2_rep_c3681	complement component c3	C:extracellular space, C:extracellular region, F:protein binding, F:endopeptidase inhibitor activity
116	rud_dec2_c1379	0.20028526	4.70E-01	0.041539364	0.29004344	0.42494678	32	0.007827664	0.022272109	0.026453515	1.358691095958870E-03	0.9705963	8.80359E-06	0.0294037	0.064642398	gene116	rud_dec2_c1379	predicted protein [Nematostella vectensis]	F:nucleic acid binding, P:regulation of transcription, F:zinc ion binding, F:transcription regulator activity	tribolium castaneum 12 cg13418-pa mrna	rpa12_rat ame: full=dna-directed rna polymerase i subunit rpa12 ame: full=zinc ribbon domain-containing protein 1	F:metal ion binding, F:DNAdirected RNA polymerase activity, P:regulation of transcription, F:zinc ion binding, F:transcription regulator activity, C:nucleolus, C:nucleus	sp|Q6MFY5|RPA12_RAT	ENSDARP00000121696	ENSP00000395065		ENSGACP00000001903	ENSORLP00000013354	ENSDARP00000052357	ENSTRUP00000012545	ENSTNIP00000007670	ENSBTAP00000042491	ENSMUSP00000109299	FBpp0083564	ENSCSAVP00000014073	C15H11.8.2	ENSCINP00000027895							ENSGACT00000001906	3.00E-10
117	AS_rud_dec_c42696	0.4846246	6.96E-01	0.46008402	0.37612772	0.14146332	32	0.030721088	0.026426304	0.012494331	1.414820696822970E-03	0.9699954	8.79814E-06	0.0300046	0.063010232	gene117	AS_rud_dec_c42696			venerupis pullastra microsatellite locus 2-74
118	rud_dec_c24101	0.7999198	8.81E-01	0.39096582	0.5056024	0.6623884	32	0.027836735	0.032049887	0.036276644	1.484329385220910E-03	0.9692675	8.79154E-06	0.0307325	0.061448276	gene118	rud_dec_c24101																		ENSCSAVP00000011701
122	rud_dec_c7510	0.94412076	9.63E-01	0.71760845	0.7029615	0.5882812	32	0.040244898	0.039637188	0.033437642	3.286985271500950E-02	0.8561318	7.76537E-06	0.1438682	0.21762854	gene122	rud_dec_c7510			venerupis decussatus partial srp54 gene for signal recognition particle 54-kda clone exons a-b
124	AS_rud_dec_c19187	0.54571766	7.36E-01	0.39416352	0.47486115	0.4991983	32	0.02799093	0.030848073	0.02969161	1.208094838602840E-03	0.972273	8.8188E-06	0.027727	0.070067566	gene124	AS_rud_dec_c19187
125	rud_dec_c9481	0.75221294	8.52E-01	0.6114633	0.43976882	0.6881513	32	0.036698413	0.029192744	0.037274376	1.382596727239610E-03	0.9703389	8.80126E-06	0.0296611	0.063845793	gene125	rud_dec_c9481	histone h1	C:nucleosome, F:DNA binding, P:nucleosome assembly, C:nucleus	venerupis pullastra histone h1 complete cds	h1d_strpu ame: full=histone h1-delta	C:intracellular organelle	sp|P15870|H1D_STRPU	ENSDARP00000056285	ENSP00000344504	ENSXETP00000034845	ENSGACP00000011922	ENSORLP00000009575	ENSDARP00000097146	ENSTRUP00000044338	ENSTNIP00000015798	ENSBTAP00000049194	ENSMUSP00000060761	FBpp0091110		M163.3
126	rud_dec2_c1869	0.050211307	2.44E-01	0.009278283	0.55488706	0.93070614	32	0.003519274	0.034235828	0.047192744	1.074410552234890E-03	0.9738515	8.83312E-06	0.0261485	0.07673986	gene126	rud_dec2_c1869	PREDICTED: hypothetical protein LOC701581 [Macaca mulatta]			lip_staeq ame: full=lipase ame: full=glycerol ester hydrolase flags: precursor	F:hydrolase activity, C:membrane, P:lipid catabolic process, F:triglyceride lipase activity, C:extracellular region	sp|Q5HKP6|LIP_STAEQ	ENSDARP00000083057	ENSP00000416752	ENSXETP00000057883	ENSGACP00000023376	ENSORLP00000004974	ENSDARP00000083057	ENSTRUP00000030581	ENSTNIP00000000086	ENSBTAP00000020732	ENSMUSP00000068913	FBpp0291704	ENSCSAVP00000008502	ZC449.5.2	ENSCINP00000019619
127	rud_dec_c18679	0.20208117	4.72E-01	0.19615522	0.056696035	0.22801647	32	0.018045351	0.007927438	0.017106576	4.231278353256580E-02	0.8370247	7.59206E-06	0.1629753	0.243161442	gene127	rud_dec_c18679																		ENSCSAVP00000017522
129	rud_dec_c7619	0.93132067	9.57E-01	0.7366024	0.56911826	0.97871786	32	0.040897959	0.034798186	0.049156463	1.219738059489820E-03	0.9721397	8.81759E-06	0.0278603	0.069261183	gene129	rud_dec_c7619	unnamed protein product [Tetraodon nigroviridis]			sast_rat ame: full=s-acyl fatty acid synthase medium chain ame: full=oleoyl-acp hydrolase ame: full=thioesterase ii ame: full=thioesterase domain-containing protein 1	F:hydrolase activity. acting on ester bonds, P:fatty acid biosynthetic process	sp|P08635|SAST_RAT	ENSDARP00000075821	ENSP00000268379	ENSXETP00000032036	ENSGACP00000003197	ENSORLP00000011432	ENSDARP00000075821	ENSTRUP00000032168	ENSTNIP00000005190	ENSBTAP00000028853	ENSMUSP00000110739
131	AS_rud_dec_c20826	0.40370977	6.46E-01	0.28073764	0.15838705	0.841093	32	0.022526077	0.015052154	0.043614512	1.689627024802570E-03	0.9672121	8.7729E-06	0.0327879	0.057377524	gene131	AS_rud_dec_c20826	PREDICTED: hypothetical protein [Saccoglossus kowalevskii]								ENSXETP00000018035		ENSORLP00000024075		ENSTRUP00000015885	ENSTNIP00000018882
132	new_rud_dec_c24092	0.4109106	6.51E-01	0.6047377	0.14494681	0.8459113	32	0.036453515	0.014204082	0.043791383	1.617912801066260E-05	0.9967907	9.04119E-06	0.0032093	0.442201424	gene132	new_rud_dec_c24092
133	AS_rud_dec2_rep_c2848	0.87135535	9.21E-01	0.5081269	0.5617381	0.902715	32	0.032562358	0.03447619	0.046095238	4.622159212296420E-01	0.4965902	4.50422E-06	0.5034098	0.627866737	gene133	AS_rud_dec2_rep_c2848			venerupis decussatus partial srp54 gene for signal recognition particle 54-kda clone exons a-b
134	new_rud_dec_s32488	0.13671288	3.91E-01	0.075146414	0.24956682	0.04939088	32	0.010653061	0.020049887	0.006585034	5.560286339395470E-01	0.4558648	4.13483E-06	0.5441352	0.664672242	gene134	new_rud_dec_s32488			esox lucius clone eluc-evq-501-207 40s ribosomal protein s27 complete cds																		ENSBTAT00000057552	3.00E-08	ENST00000411926	6.00E-13	ENSXETT00000053425	2.00E-10			ENSORLT00000000731	3.00E-07	ENSDART00000134604	7.00E-06
136	rud_dec_c587	0.670536	8.06E-01	0.27075455	0.80633783	0.98022836	32	0.021995465	0.043351474	0.049238095	9.963042688241330E-04	0.9748195	8.8419E-06	0.0251805	0.081492851	gene136	rud_dec_c587
137	rud_dec2_c999	0.008096023	1.02E-01	0.122411884	0.4224979	0.000874703	32	0.013809524	0.02845805	0.00044898	1.252155921665680E-01	0.7234452	6.56186E-06	0.2765548	0.38764796	gene137	rud_dec2_c999			venerupis decussatus partial srp54 gene for signal recognition particle 54-kda clone exons a-b
138	rud_dec_c12598	0.6641567	8.02E-01	0.8706586	0.9802734	0.2444789	32	0.045736961	0.049310658	0.017968254	9.969996116865330E-04	0.9748107	8.84182E-06	0.0251893	0.08147349	gene138	rud_dec_c12598	nucleosome-remodeling factor subunit nurf301			bptf_human ame: full=nucleosome-remodeling factor subunit bptf ame: full=bromodomain and phd finger-containing transcription factor ame: full=fetal alz-50 clone 1 protein ame: full=fetal alzheimer antigen	F:transcription regulator activity, P:brain development, P:negative regulation of transcription from RNA polymerase II promoter, F:sequencespecific DNA binding, P:positive regulation of genespecific transcription, F:transcription factor binding, F:DNAdependent ATPase activity, P:chromatin remodeling, C:nucleus	sp|Q12830|BPTF_HUMAN	ENSDARP00000102656	ENSP00000315454	ENSXETP00000003356	ENSGACP00000009172	ENSORLP00000019077	ENSDARP00000099756	ENSTRUP00000004516	ENSTNIP00000009216	ENSBTAP00000019440	ENSMUSP00000102374	FBpp0072422		F26H11.2c
139	rud_dec_c18464	0.006873865	9.56E-02	0.24887352	0.013709978	0.001382107	32	0.020802721	0.003315193	0.00060771	9.378970117013520E-01	0.3328193	3.01877E-06	0.6671807	0.769603689	gene139	rud_dec_c18464																															ENSDART00000101107	4.00E-07
141	AS_rud_dec_c41244	0.17729396	4.44E-01	0.24928217	0.15123685	0.35610574	32	0.020825397	0.014630385	0.023247166	1.571292630751250E+00	0.2100194	1.90494E-06	0.7899806	0.864914199	gene141	AS_rud_dec_c41244	calponin-like protein
142	newAS_rud_dec_rep_c45517	0.95818526	9.73E-01	0.95635325	0.62364686	0.97175974	32	0.048643991	0.036834467	0.048848073	1.479462830843650E-03	0.9693179	8.792E-06	0.0306821	0.061593296	gene142	newAS_rud_dec_rep_c45517			oryza punctata clone: expressed in shoot apical meristem of bb genome																				ENST00000511141	3E-11	ENSXETT00000011074	2E-11	ENSGACT00000021016	0.000000008			ENSDART00000021976	0.00000006
143	rud_dec_c8496	0.2457491	5.14E-01	0.08201146	0.9561488	0.2062233	32	0.011133787	0.048566893	0.015922902	7.341697417701310E-01	0.3915349	3.55134E-06	0.6084651	0.720884651	gene143	rud_dec_c8496			venerupis decussatus partial srp54 gene for signal recognition particle 54-kda clone exons a-b
144	rud_dec_c18571	0.58363074	7.61E-01	0.3233085	0.51857495	0.7144495	32	0.024666667	0.032585034	0.038390023	1.152527200247270E-03	0.9729179	8.82465E-06	0.0270821	0.072387485	gene144	rud_dec_c18571	PREDICTED: similar to predicted protein [Ciona intestinalis]		ciona intestinalis protein mrna	f183a_human ame: full=protein fam183a		sp|A6NL82|F183A_HUMAN	ENSDARP00000110223	ENSP00000334415							ENSBTAP00000033194	ENSMUSP00000091708		ENSCSAVP00000007432		ENSCINP00000024583
146	rud_dec_c8173	0.07688212	2.98E-01	0.55994123	0.028619511	0.15696153	32	0.034743764	0.00523356	0.013356009	1.005335440639890E+00	0.3160229	2.86642E-06	0.6839771	0.782834552	gene146	rud_dec_c8173	tsga2 epididymal isoform	P:meiosis	saccoglossus kowalevskii radial spoke head 1-like mrna	rsph1_mouse ame: full=radial spoke head 1 homolog ame: full=male meiotic metaphase chromosome-associated acidic protein ame: full=meichroacidin ame: full=testis-specific gene a2 protein		sp|Q8VIG3|RSPH1_MOUSE	ENSDARP00000094167	ENSP00000381395	ENSXETP00000023084	ENSGACP00000002976	ENSORLP00000016385	ENSDARP00000094167	ENSTRUP00000009968	ENSTNIP00000003460	ENSBTAP00000041113	ENSMUSP00000094968		ENSCSAVP00000009743		ENSCINP00000012862	ENSBTAT00000043552	3.00E-08	ENST00000398352	3.00E-11							ENSDART00000103390	3.00E-11
147	rud_dec2_rep_c3659	0.8375241	9.02E-01	0.87466997	0.54254556	0.48754853	32	0.045868481	0.033687075	0.029120181	7.102886853544980E-04	0.9787379	8.87744E-06	0.0212621	0.10514676	gene147	rud_dec2_rep_c3659	aldose reductase. putative [Pediculus humanus corporis]		apis mellifera alcohol dehydrogenase a- transcript variant 1 mrna	didh_rat ame: full=3-alpha-hydroxysteroid dehydrogenase short=3-alpha-hsd ame: full=hydroxyprostaglandin dehydrogenase	P:steroid metabolic process, F:steroid dehydrogenase activity. acting on the CHOH group of donors. NAD or NADP as acceptor	sp|P23457|DIDH_RAT	ENSDARP00000051081	ENSP00000263126	ENSXETP00000050592	ENSGACP00000025090	ENSORLP00000014185	ENSDARP00000051081	ENSTRUP00000041932	ENSTNIP00000000491	ENSBTAP00000016703	ENSMUSP00000079232	FBpp0075870	ENSCSAVP00000011587	Y39G8B.1b	ENSCINP00000016253
148	AS_rud_dec_rep_c15420	0.33860344	5.92E-01	0.36572948	0.18101187	0.7013524	32	0.026734694	0.016403628	0.037845805	7.410908297060810E-04	0.9782819	8.87331E-06	0.0217181	0.101958525	gene148	AS_rud_dec_rep_c15420			capsicum chinense mrna for ethylene response protein (erp gene)
150	rud_dec_c2032	9.20E-04	3.37E-02	0.32717535	0.000621724	0.4437749	32	0.024852608	0.000512472	0.027188209	7.551456414341250E+00	0.005996159	5.43869E-08	0.994003841	0.997260794	gene150	rud_dec_c2032	cathepsin b	F:cysteinetype endopeptidase activity, P:proteolysis	meretrix meretrix cathepsin b complete cds	catb_rat ame: full=cathepsin b ame: full=cathepsin b1 ame: full=rsg-2 contains: ame: full=cathepsin b light chain contains: ame: full=cathepsin b heavy chain flags: precursor	P:regulation of catalytic activity, F:peptidase activity	sp|P00787|CATB_RAT	ENSDARP00000088034	ENSP00000415889	ENSXETP00000001470	ENSGACP00000021389	ENSORLP00000013899	ENSDARP00000088034	ENSTRUP00000023604	ENSTNIP00000020845	ENSBTAP00000036650	ENSMUSP00000006235	FBpp0073669	ENSCSAVP00000015292	C25B8.3b	ENSCINP00000016178	ENSBTAT00000036795	2.00E-24	ENST00000415599	2.00E-26	ENSXETT00000062707	8.00E-34	ENSGACT00000021430	2.00E-29	ENSORLT00000013900	9.00E-20	ENSDART00000097263	6.00E-26
151	rud_dec_c42587	0.27165926	5.39E-01	0.32697406	0.60425633	0.1826231	32	0.024843537	0.036136054	0.01477551	4.547805246488670E-04	0.9829859	8.91597E-06	0.0170141	0.145159771	gene151	rud_dec_c42587			Capsicum chinense mRNA for hypothetical protein (ORF1)
152	rud_dec2_c44	0.006628043	9.40E-02	0.2692229	0.36802846	0.003509842	32	0.021886621	0.026004535	0.00107483	1.466794005782840E+00	0.2258522	2.04855E-06	0.7741478	0.853087194	gene152	rud_dec2_c44	hoip-prov protein		Medicago truncatula clone MTYFD_FE_FF_FG1G-E-15 unknown mRNA	nh2l1_xentr ame: full=nhp2-like protein 1 ame: full=high mobility group-like nuclear protein 2 homolog 1 ame: full=u4 tri-snrnp kda protein	C:nucleolus, P:RNA splicing, C:spliceosomal complex, F:RNA binding, P:ribosome biogenesis, P:mRNA processing	sp|Q6P8E9|NH2L1_XENTR	ENSDARP00000087463	ENSP00000383989	ENSXETP00000055093	ENSGACP00000012630	ENSORLP00000004402	ENSDARP00000087463	ENSTRUP00000042915	ENSTNIP00000015849	ENSBTAP00000008022	ENSMUSP00000130867	FBpp0079443	ENSCSAVP00000017530	M28.5.2	ENSCINP00000027250	ENSBTAT00000008022	3.00E-33	ENST00000402458	1.00E-33	ENSXETT00000055093	2.00E-48	ENSGACT00000012654	6.00E-36	ENSORLT00000004403	3.00E-39	ENSDART00000029133	2.00E-39
153	rud_dec_c10815	0.2932199	5.59E-01	0.336472	0.2746945	0.45491347	32	0.025287982	0.021428571	0.027664399	4.184469249821630E-04	0.9836796	8.92226E-06	0.0163204	0.149294414	gene153	rud_dec_c10815	caspase 8			casp1_spofr ame: full=caspase-1 contains: ame: full=caspase-1 subunit p19 18 contains: ame: full=caspase-1 subunit p12 flags: precursor	P:apoptosis, P:proteolysis, F:hydrolase activity, F:cysteinetype peptidase activity, F:peptidase activity, F:cysteinetype endopeptidase activity	sp|P89116|CASP1_SPOFR	ENSDARP00000006831	ENSP00000398107	ENSXETP00000035938	ENSGACP00000022402	ENSORLP00000010098	ENSDARP00000006831	ENSTRUP00000040691	ENSTNIP00000009934	ENSBTAP00000006695	ENSMUSP00000026062	FBpp0084848	ENSCSAVP00000002970	C48D1.2a
154	rud_dec_c12620	0.007774392	1.00E-01	0.61001456	0.1045686	0.002254633	32	0.036630385	0.011564626	0.00078458	7.941271941263030E-04	0.9775184	8.86638E-06	0.0224816	0.096613909	gene154	rud_dec_c12620			venerupis decussatus partial srp54 gene for signal recognition particle 54-kda clone exons a-b
156	new_rud_dec_c3652	0.73038936	8.40E-01	0.76047516	0.4033028	0.7276835	32	0.041827664	0.027650794	0.038888889	3.084977173260760E-01	0.5786035	5.2481E-06	0.4213965	0.547442972	gene156	new_rud_dec_c3652
157	new_rud_dec_rep_c18714	0.015155867	1.37E-01	0.008722622	0.41216624	0.3374475	32	0.003424036	0.028049887	0.022371882	1.722634420389110E-04	0.9895281	8.97531E-06	0.0104719	0.251485302	gene157	new_rud_dec_rep_c18714																							ENST00000281156	6.00E-06
158	AS_rud_dec2_c257	0.92938554	9.55E-01	0.5405127	0.93644583	0.99654305	32	0.034022676	0.047814059	0.049854875	4.445824401955170E-04	0.9831778	8.91771E-06	0.0168222	0.146470072	gene158	AS_rud_dec2_c257	PREDICTED: lobe protein-like [Saccoglossus kowalevskii]			akts1_human ame: full=proline-rich akt1 substrate 1 ame: full=40 kda proline-rich akt substrate	P:regulation of cellular process, C:cytoplasm	sp|Q96B36|AKTS1_HUMAN	ENSDARP00000098444	ENSP00000375710	ENSXETP00000006310	ENSGACP00000017783		ENSDARP00000098444	ENSTRUP00000001286	ENSTNIP00000004226	ENSBTAP00000007575	ENSMUSP00000049764		ENSCSAVP00000006291		ENSCINP00000003614
159	rud_dec_c25099	0.32232526	5.81E-01	0.2086377	0.34298792	0.600702	32	0.018739229	0.02477551	0.033941043	1.171645849922240E-03	0.9726943	8.82262E-06	0.0273057	0.07130792	gene159	rud_dec_c25099
160	rud_dec_c25955	0.9709332	9.81E-01	0.82100487	0.82619405	0.7741505	32	0.044004535	0.043995465	0.040798186	1.777601971184590E-04	0.9893624	8.97381E-06	0.0106376	0.244798048	gene160	rud_dec_c25955	PREDICTED: similar to conserved hypothetical protein [Hydra magnipapillata]																	ENSCSAVP00000008352
161	rud_dec_c22780	0.15844972	4.20E-01	0.1758475	0.06175097	0.0961863	32	0.016911565	0.008385488	0.0098322	3.446398267783470E-04	0.9851885	8.93595E-06	0.0148115	0.172041269	gene161	rud_dec_c22780			venerupis decussatus partial srp54 gene for signal recognition particle 54-kda clone exons a-b
162	newAS_rud_dec_c9693	0.7871469	8.74E-01	0.50927234	0.6835635	0.6546034	32	0.032598639	0.039047619	0.035986395	2.088190880726870E-04	0.9884705	8.96572E-06	0.0115295	0.22735184	gene162	newAS_rud_dec_c9693			venerupis philippinarum tm-rudp mrna for complete cds
163	new_rud_dec_c18736	0.017285448	1.47E-01	0.36893538	0.37780294	0.001756666	32	0.026893424	0.026494331	0.000675737	1.399731278962460E+00	0.2367686	2.14756E-06	0.7632314	0.844095487	gene163	new_rud_dec_c18736			dictyostelium discoideum ax4 ras interacting protein complete cds																												ENSDART00000121904	5.00E-08
164	rud_dec_rep_c43361	0.34278867	5.96E-01	0.45342848	0.99445784	0.18464151	32	0.030426304	0.049814059	0.014861678	2.082087257804230E-04	0.9884874	8.96587E-06	0.0115126	0.228243507	gene164	rud_dec_rep_c43361	ubiquitin a-52 residue ribosomal protein fusion product 1	C:ribosome, P:translation	crassostrea hongkongensis ubiquitin complete cds	rl40_bovin ame: full=ubiquitin-60s ribosomal protein l40 ame: full=ubiquitin a-52 residue ribosomal protein fusion product 1 contains: ame: full=ubiquitin contains: ame: full=60s ribosomal protein l40 ame: full=cep52 flags: precursor	P:axon guidance, P:ERassociated protein catabolic process, C:nucleoplasm, F:transcription regulator activity, P:positive regulation of transcription, F:protein binding, P:regulation of synaptic plasticity, P:translational elongation, P:induction of apoptosis by extracellular signals, P:antiapoptosis, P:positive regulation of ubiquitinprotein ligase activity during mitotic cell cycle, F:structural…	sp|P0C276|RL40_SHEEP	ENSDARP00000060744	ENSP00000388107	ENSXETP00000050158	ENSGACP00000010640	ENSORLP00000010731	ENSDARP00000060744	ENSTRUP00000009801	ENSTNIP00000013085	ENSBTAP00000010176	ENSMUSP00000113804	FBpp0077159	ENSCSAVP00000003728	ZK1010.1.2		ENSBTAT00000010176	6.00E-63	ENST00000442744	6.00E-65	ENSXETT00000050158	1.00E-65	ENSGACT00000010662	1.00E-57	ENSORLT00000010732	2.00E-67	ENSDART00000060745	3.00E-56
166	rud_dec_c24139	0.53022355	7.28E-01	0.32026058	0.2220302	0.36292803	32	0.02447619	0.018648526	0.023564626	1.588131748462720E-03	0.9682116	8.78196E-06	0.0317884	0.058980564	gene166	rud_dec_c24139	spindle assembly 6 homolog			sas6_xenla ame: full=spindle assembly abnormal protein 6 homolog	C:intracellular part	sp|Q6NRG6|SAS6_XENLA	ENSDARP00000075634	ENSP00000287482	ENSXETP00000020157	ENSGACP00000002793	ENSORLP00000003086	ENSDARP00000075634	ENSTRUP00000015630	ENSTNIP00000006591	ENSBTAP00000020951	ENSMUSP00000125980	FBpp0084912	ENSCSAVP00000011124		ENSCINP00000018623
167	AS_rud_dec_c27897	0.78013927	8.70E-01	0.5140751	0.37123317	0.8126637	32	0.032848073	0.02614059	0.042471655	4.483849423536410E-03	0.9466123	8.58605E-06	0.0533877	0.085474599	gene167	AS_rud_dec_c27897			venerupis philippinarum mitochondrial complete female type
168	rud_dec2_c483	0.62313896	7.81E-01	0.43306965	0.49981827	0.64473754	32	0.02952381	0.031818594	0.035673469	1.097816527021670E-03	0.9735683	8.83055E-06	0.0264317	0.075247063	gene168	rud_dec2_c483	defensin [Ruditapes philippinarum]		venerupis philippinarum defensin complete cds	defi_mytga ame: full=defensin mgd-1 flags: precursor	P:defense response, C:extracellular region, P:defense response to bacterium	sp|P80571|DEFI_MYTGA
169	rud_dec_c38266	0.5398507	7.33E-01	0.9688925	0.17894712	0.43462744	32	0.049015873	0.01629932	0.026780045	4.994130101238730E-01	0.4797582	4.35155E-06	0.5202418	0.644050467	gene169	rud_dec_c38266
170	rud_dec_c24697	0.40969044	6.50E-01	0.5866606	0.12341607	0.2455659	32	0.035741497	0.012920635	0.018045351	8.081940601414310E-04	0.9773202	8.86458E-06	0.0226798	0.095602079	gene170	rud_dec_c24697	PREDICTED: predicted protein-like [Saccoglossus kowalevskii]			ro60_human ame: full=60 kda ss-a ro ribonucleoprotein short=60 kda ro protein short=60 kda ribonucleoprotein ro short= ame: full=ro 60 kda autoantigen ame: full=sjoegren syndrome antigen a2 ame: full=sjoegren syndrome type a antigen short=ss-a ame: full=trove domain family member 2	C:intracellular part, F:binding	sp|P10155|RO60_HUMAN	ENSDARP00000105539	ENSP00000383753	ENSXETP00000037511						ENSBTAP00000018350	ENSMUSP00000125623
171	rud_dec2_rep_c3449	0.6512647	7.96E-01	0.39306533	0.27765876	0.5178725	32	0.027936508	0.021609977	0.030585034	1.631521163801600E-03	0.9677805	8.77805E-06	0.0322195	0.05810791	gene171	rud_dec2_rep_c3449	aldose reductase. putative [Pediculus humanus corporis]		apis mellifera alcohol dehydrogenase a- transcript variant 1 mrna	didh_rat ame: full=3-alpha-hydroxysteroid dehydrogenase short=3-alpha-hsd ame: full=hydroxyprostaglandin dehydrogenase	P:steroid metabolic process, F:steroid dehydrogenase activity. acting on the CHOH group of donors. NAD or NADP as acceptor	sp|P23457|DIDH_RAT	ENSDARP00000051081	ENSP00000242375	ENSXETP00000050592	ENSGACP00000025090	ENSORLP00000014185	ENSDARP00000051081	ENSTRUP00000041932	ENSTNIP00000000491	ENSBTAP00000002172	ENSMUSP00000079232	FBpp0075869	ENSCSAVP00000011587	Y39G8B.1b	ENSCINP00000016253
173	rud_dec_c2411	0.006875904	9.55E-02	0.01648744	0.13256314	0.12871836	32	0.004721088	0.01353288	0.011746032	1.245983582459530E+00	0.264321	2.39747E-06	0.735679	0.823288286	gene173	rud_dec_c2411			venerupis decussatus partial srp54 gene for signal recognition particle 54-kda clone exons a-b
174	rud_dec2_c745	5.19E-04	2.60E-02	8.64928E-05	0.60409033	0.113679886	32	0.000376417	0.036126984	0.010866213	5.571448701595040E-01	0.4554129	4.13073E-06	0.5445871	0.665003169	gene174	rud_dec2_c745	microsomal glutathione s-transferase 3-like isoform 1			mgst3_mouse ame: full=microsomal glutathione s-transferase 3 short=microsomal gst-3 ame: full=microsomal gst-iii	C:cell part, F:catalytic activity	sp|Q9CPU4|MGST3_MOUSE	ENSDARP00000036226	ENSP00000356861	ENSXETP00000010309	ENSGACP00000021443	ENSORLP00000012767	ENSDARP00000036226	ENSTRUP00000001801	ENSTNIP00000010678	ENSBTAP00000013559	ENSMUSP00000028005				ENSCINP00000002062					ENSXETT00000010309	1.00E-06			ENSORLT00000021935	1.00E-07	ENSDART00000045329	2.00E-07
175	rud_dec_c12205	0.10761725	3.52E-01	0.23431838	0.14291088	0.33523765	32	0.01999093	0.014045351	0.022263039	1.885319034574870E-01	0.6641413	6.02396E-06	0.3358587	0.456945254	gene175	rud_dec_c12205	PREDICTED: similar to predicted protein [Ciona intestinalis]			y1101_syny3 ame: full=universal stress protein slr1101 short=usp slr1101	P:response to stress	sp|P72745|Y1101_SYNY3												ENSCSAVP00000002777		ENSCINP00000029286
177	newAS_rud_dec_c37124	0.11801977	3.65E-01	0.024296472	0.7923406	0.17245112	32	0.005777778	0.042920635	0.014267574	2.780760203420410E-01	0.597965	5.42372E-06	0.402035	0.527261369	gene177	newAS_rud_dec_c37124
178	rud_dec2_c2893	0.27397478	5.40E-01	0.7527178	0.7208943	0.05721086	32	0.041569161	0.040240363	0.007151927	3.174349805567540E-02	0.8585918	7.78768E-06	0.1414082	0.214289605	gene178	rud_dec2_c2893			crassostrea gigas clone complete sequence
179	rud_dec2_rep_c3315	0.41883346	6.55E-01	0.12941003	0.9211582	0.845363	32	0.014263039	0.04724263	0.043777778	8.085048294788060E-04	0.9773158	8.86454E-06	0.0226842	0.095547549	gene179	rud_dec2_rep_c3315	hypothetical protein BRAFLDRAFT_124447 [Branchiostoma floridae]	F:sequencespecific DNA binding	loa loa mbf-1 protein complete cds	edf1_chick ame: full=endothelial differentiation-related factor 1 homolog short=edf-1	P:positive regulation of DNA binding, P:regulation of transcription, F:sequencespecific DNA binding, F:transcription coactivator activity, C:transcription factor TFIID complex, C:cytoplasm	sp|Q5ZMC0|EDF1_CHICK	ENSDARP00000026769	ENSP00000224073	ENSXETP00000008592	ENSGACP00000021868		ENSDARP00000026769	ENSTRUP00000021920	ENSTNIP00000021911	ENSBTAP00000040410	ENSMUSP00000015236	FBpp0075151		H21P03.1	ENSCINP00000029469	ENSBTAT00000042787	2.00E-14	ENST00000371648	1.00E-19	ENSXETT00000008592	2.00E-13	ENSGACT00000021909	6.00E-14			ENSDART00000015940	1.00E-18
184	AS_rud_dec_c21597	0.63827014	7.89E-01	0.5039454	0.22660576	0.68813926	32	0.032399093	0.018929705	0.037269841	7.375871959993670E-04	0.9783333	8.87377E-06	0.0216667	0.102283526	gene184	AS_rud_dec_c21597	dag1 protein			dag1_human ame: full=dystroglycan ame: full=dystrophin-associated glycoprotein 1 contains: ame: full=alpha-dystroglycan short=alpha-dg contains: ame: full=beta-dystroglycan short=beta-dg flags: precursor	C:plasma membrane part, C:membrane fraction, P:multicellular organismal process, F:protein binding, C:proteinaceous extracellular matrix, C:intracellular part	sp|Q14118|DAG1_HUMAN	ENSDARP00000106371	ENSP00000312435		ENSGACP00000004010	ENSORLP00000013717	ENSDARP00000020759	ENSTRUP00000018146	ENSTNIP00000007942	ENSBTAP00000015385	ENSMUSP00000130626
185	AS_rud_dec_c13552	0.64720744	7.94E-01	0.95051134	0.7103292	0.32379895	32	0.04846712	0.039931973	0.021795918	3.178722330403610E-04	0.9857753	8.94127E-06	0.0142247	0.18403623	gene185	AS_rud_dec_c13552	scavenger receptor cysteine-rich protein precursor			dmbt1_pig ame: full=deleted in malignant brain tumors 1 protein ame: full=hensin flags: precursor	F:binding, C:membrane, C:cytoplasmic vesicle	sp|Q4A3R3|DMBT1_PIG	ENSDARP00000119536	ENSP00000343268	ENSXETP00000015487	ENSGACP00000014432	ENSORLP00000020584	ENSDARP00000019688	ENSTRUP00000028716	ENSTNIP00000006796	ENSBTAP00000052788	ENSMUSP00000006366	FBpp0076255	ENSCSAVP00000011339
186	rud_dec_c37072	0.08496092	3.14E-01	0.23738077	0.12692295	0.29011112	32	0.020154195	0.013133787	0.020154195	1.454305331507720E-01	0.7029409	6.37588E-06	0.2970591	0.412247571	gene186	rud_dec_c37072	hypothetical protein TcasGA2_TC010399 [Tribolium castaneum]		taeniopygia guttata transmembrane protein 164 mrna	tm164_bovin ame: full=transmembrane protein 164	C:membrane	sp|Q6PHN7|TM164_MOUSE	ENSDARP00000088433	ENSP00000361138	ENSXETP00000027171	ENSGACP00000026812	ENSORLP00000013064	ENSDARP00000088433	ENSTRUP00000005471		ENSBTAP00000043507	ENSMUSP00000108518	FBpp0085361	ENSCSAVP00000014446	C35C5.10a.2	ENSCINP00000008479	ENSBTAT00000046184	2.00E-09	ENST00000372068	8.00E-09	ENSXETT00000027170	2.00E-07					ENSDART00000097663	4.00E-07
187	rud_dec_c11731	0.89612216	9.35E-01	0.8012937	0.87927353	0.45077583	32	0.043310658	0.045868481	0.027505669	1.867016002393020E-03	0.9655349	8.75769E-06	0.0344651	0.056830037	gene187	rud_dec_c11731	asparaginase-like 1-like		caldivirga maquilingensis ic- complete genome	asgl1_xenla ame: full=l-asparaginase ame: full=asparaginase-like protein 1 ame: full=l-asparagine amidohydrolase	P:asparagine catabolic process via Laspartate, C:cytoplasm, F:N4(betaNacetylglucosaminyl)Lasparaginase activity	sp|Q6GM78|ASGL1_XENLA	ENSDARP00000033788	ENSP00000301776	ENSXETP00000004939	ENSGACP00000008046	ENSORLP00000012747	ENSDARP00000099443	ENSTRUP00000011826	ENSTNIP00000012777	ENSBTAP00000009073	ENSMUSP00000051709	FBpp0073861	ENSCSAVP00000007050		ENSCINP00000005461
188	rud_dec_c22392	0.1591077	4.21E-01	0.4055876	0.361311	0.17001262	32	0.02846712	0.025628118	0.014099773	1.851373212612030E+00	0.1736238	1.57482E-06	0.8263762	0.889564927	gene188	rud_dec_c22392
189	rud_dec2_c712	0.011802373	1.20E-01	0.00110945	0.4693603	0.3755824	32	0.001315193	0.030585034	0.024195011	1.005577973501200E-03	0.9747026	8.84084E-06	0.0252974	0.080733422	gene189	rud_dec2_c712	small nuclear ribonucleoprotein-associated protein b -like		saccoglossus kowalevskii small nuclear ribonucleoprotein polypeptide n-like mrna	rsmn_bovin ame: full=small nuclear ribonucleoprotein-associated protein n short=snrnp-n ame: full=sm protein n short=sm-n short=	C:nucleus, C:ribonucleoprotein complex, F:RNA binding	sp|P63164|RSMN_RAT	ENSDARP00000023337	ENSP00000336543	ENSXETP00000056980	ENSGACP00000004291	ENSORLP00000011741	ENSDARP00000023337	ENSTRUP00000003558	ENSTNIP00000005560	ENSBTAP00000010856	ENSMUSP00000055941	FBpp0079635	ENSCSAVP00000002805	W08E3.1.1	ENSCINP00000028022	ENSBTAT00000001379	2.00E-38	ENST00000303103	6.00E-34	ENSXETT00000056980	1.00E-40	ENSGACT00000004305	6.00E-25	ENSORLT00000011742	6.00E-31	ENSDART00000011663	7.00E-34
190	rud_dec_c32456	0.07962987	3.05E-01	0.024858557	0.5248488	0.055543065	32	0.005886621	0.032839002	0.007034014	1.534210246575180E-03	0.9687557	8.7869E-06	0.0312443	0.060074292	gene190	rud_dec_c32456	hypothetical protein DAPPUDRAFT_300886 [Daphnia pulex]			gipc2_rat ame: full=pdz domain-containing protein gipc2	C:cytoplasm, F:protein binding	sp|Q498D9|GIPC2_RAT	ENSDARP00000004582	ENSP00000341425	ENSXETP00000028795	ENSGACP00000021892	ENSORLP00000004472	ENSDARP00000004582	ENSTRUP00000009964	ENSTNIP00000013355	ENSBTAP00000001013	ENSMUSP00000037328	FBpp0087887
191	rud_dec_c10801	0.035023656	2.07E-01	0.7554007	0.005956124	0.95282334	32	0.041655329	0.001972789	0.048190476	1.174588605125500E+00	0.2784604	2.52572E-06	0.7215396	0.812330815	gene191	rud_dec_c10801
192	rud_dec2_c1755	0.07851751	3.03E-01	0.10035333	0.02556584	0.09497734	32	0.012358277	0.004943311	0.009741497	3.273435696655720E-04	0.985565	8.93937E-06	0.014435	0.179590299	gene192	rud_dec2_c1755	PREDICTED: Rpn12-like [Saccoglossus kowalevskii]		saccoglossus kowalevskii rpn12-like mrna	psmd8_ponab ame: full=26s proteasome non-atpase regulatory subunit 8 ame: full=26s proteasome regulatory subunit rpn12	C:proteasome regulatory particle, C:cytoplasm, P:proteolysis, C:nucleus, F:protein binding	sp|P48556|PSMD8_HUMAN	ENSDARP00000025160	ENSP00000215071	ENSXETP00000006128	ENSGACP00000017278	ENSORLP00000002834	ENSDARP00000025160	ENSTRUP00000025865	ENSTNIP00000019379	ENSBTAP00000007044	ENSMUSP00000051657	FBpp0075068		ZK20.5.2	ENSCINP00000024704	ENSBTAT00000007044	1.00E-42	ENST00000404323	2.00E-41	ENSXETT00000006128	6.00E-65	ENSGACT00000017329	1.00E-41	ENSORLT00000002835	2.00E-33	ENSDART00000005431	5.00E-57
193	AS_rud_dec_c39679	0.40492567	6.46E-01	0.3665334	0.3680593	0.37613362	32	0.02677551	0.026013605	0.024222222	2.706780592062610E-01	0.6028773	5.46827E-06	0.3971227	0.522559809	gene193	AS_rud_dec_c39679	pms1 protein	F:ATP binding, C:nucleus, P:mismatch repair, F:mismatched DNA binding	xenopus laevis pms1 postmeiotic segregation increased 1 mrna	pms1_human ame: full=pms1 protein homolog 1 ame: full=dna mismatch repair protein pms1	F:ATP binding, C:nucleus, P:mismatch repair, F:mismatched DNA binding	sp|P54277|PMS1_HUMAN	ENSDARP00000002039	ENSP00000396102	ENSXETP00000021769	ENSGACP00000003454	ENSORLP00000018914	ENSDARP00000002039	ENSTRUP00000032536	ENSTNIP00000018790	ENSBTAP00000025019	ENSMUSP00000115352	FBpp0086520	ENSCSAVP00000015755	H12C20.2a	ENSCINP00000007598	ENSBTAT00000025019	4.00E-14
196	rud_dec2_c423	0.83704835	9.02E-01	0.42949194	0.7852877	0.92048264	32	0.029360544	0.042639456	0.046829932	6.491428537174210E-04	0.9796735	8.88593E-06	0.0203265	0.111306016	gene196	rud_dec2_c423	sigma class glutathione-s-transferase	F:transferase activity		gst7_caeel ame: full=probable glutathione s-transferase 7 ame: full=gst class-sigma	F:protein binding	sp|P91253|GST7_CAEEL	ENSDARP00000032422	ENSP00000295256	ENSXETP00000041633	ENSGACP00000008615	ENSORLP00000012132	ENSDARP00000093681	ENSTRUP00000038134	ENSTNIP00000019657	ENSBTAP00000028674	ENSMUSP00000031982	FBpp0086157	ENSCSAVP00000018547	F11G11.2	ENSCINP00000025179
197	rud_dec2_c1896	0.004579817	7.95E-02	0.10642426	0.78827256	0.001214337	32	0.012834467	0.042743764	0.000566893	1.874091560023310E-02	0.8911118	8.08265E-06	0.1088882	0.168506897	gene197	rud_dec2_c1896			venerupis decussatus partial srp54 gene for signal recognition particle 54-kda clone exons a-b
199	rud_dec2_c472	0.005290268	8.43E-02	0.72624636	0.9329966	0.000902494	32	0.040489796	0.047673469	0.00045805	7.874306277885800E-01	0.3748782	3.40026E-06	0.6251218	0.734226702	gene199	rud_dec2_c472																															ENSDART00000137185	1.00E-06
200	rud_dec_c22225	0.9192475	9.49E-01	0.9846027	0.7268133	0.52368516	32	0.049537415	0.040517007	0.030807256	1.692831030709380E-03	0.9671811	8.77262E-06	0.0328189	0.05736802	gene200	rud_dec_c22225	polo kinase			stk10_mouse ame: full=serine threonine-protein kinase 10 ame: full=lymphocyte-oriented kinase	F:protein serine/threonine kinase activity	sp|O55098|STK10_MOUSE	ENSDARP00000039981	ENSP00000176763		ENSGACP00000012362	ENSORLP00000007685	ENSDARP00000039981		ENSTNIP00000004052	ENSBTAP00000023199	ENSMUSP00000099885	FBpp0072273	ENSCSAVP00000000489	C04A11.3
201	AS_rud_dec_c42534	0.33289236	5.89E-01	0.22197965	0.38313386	0.5570915	32	0.019401361	0.026743764	0.032190476	1.216594292486660E-03	0.9721757	8.81792E-06	0.0278243	0.069453637	gene201	AS_rud_dec_c42534	hypothetical protein DAPPUDRAFT_220992 [Daphnia pulex]																FBpp0075589			ENSCINP00000019573
202	rud_dec_c16494	0.08994324	3.23E-01	0.07681854	0.71721184	0.061151065	32	0.010802721	0.040131519	0.007487528	8.209780529568880E-04	0.9771416	8.86296E-06	0.0228584	0.094618154	gene202	rud_dec_c16494	fork-head box j2 3 transcription factor	F:DNA binding, P:regulation of transcription		foxj3_human ame: full=forkhead box protein j3	F:DNA binding	sp|Q8BUR3|FOXJ3_MOUSE	ENSDARP00000102208	ENSP00000354449	ENSXETP00000029487	ENSGACP00000009816	ENSORLP00000005811	ENSDARP00000102208	ENSTRUP00000037127	ENSTNIP00000017819	ENSBTAP00000053827	ENSMUSP00000101917		ENSCSAVP00000002491		ENSCINP00000002040	ENSBTAT00000060940	8.00E-07
204	rud_dec_rep_c10131	0.19265784	4.62E-01	0.75925016	0.06912204	0.18401615	32	0.041795918	0.0089161	0.014843537	6.370378184783470E-04	0.9798638	8.88765E-06	0.0201362	0.112613563	gene204	rud_dec_rep_c10131	rs18_brabe ame: full=40s ribosomal protein s18	C:ribosome, F:structural constituent of ribosome, P:translation, F:rRNA binding	crassostrea gigas mrna for ribosomal protein complete cds	rs18_brabe ame: full=40s ribosomal protein s18	C:ribosome, F:structural constituent of ribosome, P:translation, F:rRNA binding	sp|Q8ISP0|RS18_BRABE	ENSDARP00000005719	ENSP00000211372	ENSXETP00000044004	ENSGACP00000012973	ENSORLP00000001372	ENSDARP00000005719	ENSTRUP00000034159	ENSTNIP00000005526	ENSBTAP00000003431	ENSMUSP00000008812	FBpp0085586	ENSCSAVP00000008974	Y57G11C.16.2	ENSCINP00000027764	ENSBTAT00000003431	1.00E-66	ENST00000470852	3.00E-64	ENSXETT00000044004	5.00E-58	ENSGACT00000012997	2.00E-69	ENSORLT00000001373	3.00E-73	ENSDART00000017975	4.00E-76
205	AS_rud_dec_c7206	0.2182504	4.87E-01	0.30273604	0.6323212	0.19759524	32	0.023623583	0.037165533	0.015455782	1.306948962565000E-03	0.9711614	8.80872E-06	0.0288386	0.066185277	gene205	AS_rud_dec_c7206			venerupis decussatus partial srp54 gene for signal recognition particle 54-kda clone exons a-b
206	AS_rud_dec_c7408	0.6667812	8.04E-01	0.59191644	0.34902608	0.895349	32	0.035981859	0.025052154	0.045845805	4.915801691254270E-04	0.9823111	8.90985E-06	0.0176889	0.136448387	gene206	AS_rud_dec_c7408	ribosomal protein l3	C:ribosome, F:structural constituent of ribosome, P:translation	lonomia obliqua ribosomal protein 24 partial cds	rl3_drome ame: full=60s ribosomal protein l3		sp|O16797|RL3_DROME	ENSDARP00000003700	ENSP00000268661	ENSXETP00000015712	ENSGACP00000015734	ENSORLP00000001822	ENSDARP00000003700	ENSTRUP00000015753	ENSTNIP00000021172	ENSBTAP00000012541	ENSMUSP00000038326	FBpp0291741	ENSCSAVP00000001151	F13B10.2d.2		ENSBTAT00000004188	2.00E-12	ENST00000417615	6.00E-14	ENSXETT00000015712	4.00E-20	ENSGACT00000015765	2.00E-10			ENSDART00000011251	2.00E-08
207	AS_rud_dec_c20799	0.029806582	1.92E-01	0.0032553	0.3892204	0.36690357	32	0.002172336	0.027011338	0.023755102	9.773287683287890E-04	0.9750604	8.84409E-06	0.0249396	0.082530535	gene207	AS_rud_dec_c20799	protein kinase c beta 1	P:neuron migration, P:detection of mechanical stimulus involved in sensory perception of pain, P:regulation of cell shape, F:nonmembrane spanning protein tyrosine kinase activity, P:intracellular signaling pathway, P:cellular response to insulin stimulus, P:protein amino acid autophosphorylation, P:response to ethanol, P:forebrain development, F:phospholipid binding, P:activated T cell proliferat…	aplysia californica protein kinase c i mrna	kpc1_aplca ame: full=calcium-dependent protein kinase c ame: full=apl i	C:cytoplasm, P:protein amino acid phosphorylation, P:intracellular signaling pathway, F:protein kinase C activity, F:ATP binding, F:zinc ion binding	sp|Q16974|KPC1_APLCA	ENSDARP00000104985	ENSP00000318315	ENSXETP00000037655	ENSGACP00000022148	ENSORLP00000010930	ENSDARP00000038918	ENSTRUP00000024076	ENSTNIP00000008144	ENSBTAP00000040548	ENSMUSP00000064812	FBpp0086197	ENSCSAVP00000007940	E01H11.1d	ENSCINP00000017463			ENST00000321728	3.00E-17	ENSXETT00000037655	6.00E-18	ENSGACT00000022190	8.00E-10			ENSDART00000103886	9.00E-13
208	rud_dec2_rep_c3997	0.17621526	4.43E-01	0.03466523	0.32113093	0.5893576	32	0.007174603	0.02370068	0.033455782	1.886779280425790E-03	0.9653531	8.75604E-06	0.0346469	0.056942415	gene208	rud_dec2_rep_c3997	transport protein sec61 subunit beta		taeniopygia guttata sec61 beta subunit mrna	sc61b_canfa ame: full=protein transport protein sec61 subunit beta	P:ERassociated protein catabolic process, F:PPbondhydrolysisdriven protein transmembrane transporter activity, C:integral to membrane, P:protein import into nucleus. translocation, C:endoplasmic reticulum Sec complex, P:retrograde protein transport. ER to cytosol, F:epidermal growth factor binding	sp|Q5RB31|SC61B_PONAB	ENSDARP00000059012	ENSP00000223641	ENSXETP00000057092	ENSGACP00000011910	ENSORLP00000010951	ENSDARP00000059012	ENSTRUP00000028690	ENSTNIP00000021549	ENSBTAP00000003190	ENSMUSP00000126887	FBpp0086627	ENSCSAVP00000004330	Y38F2AR.9.2		ENSBTAT00000003190	2.00E-20	ENST00000223641	5.00E-18	ENSXETT00000057092	3.00E-24	ENSGACT00000011934	2.00E-15	ENSORLT00000010952	9.00E-24	ENSDART00000146936	1.00E-26
209	rud_dec_c17325	0.26864725	5.36E-01	0.7530191	0.5194289	0.05323209	32	0.041587302	0.03261678	0.006852608	1.151337279338800E-03	0.9729319	8.82478E-06	0.0270681	0.07245548	gene209	rud_dec_c17325	predicted protein [Nematostella vectensis]	P:auxin biosynthetic process, P:protein amino acid phosphorylation, F:ATP binding, F:protein serine/threonine kinase activity	acyrthosiphon pisum serine threonine-protein kinase 24-like mrna	stk25_mouse ame: full=serine threonine-protein kinase 25 ame: full=ste20-like kinase ame: full=sterile 20 oxidant stress-response kinase 1 short=sok-1 short=ste20 oxidant stress response kinase 1	P:auxin biosynthetic process, P:protein amino acid phosphorylation, F:metal ion binding, C:Golgi apparatus, F:ATP binding, F:protein serine/threonine kinase activity	sp|Q9Z2W1|STK25_MOUSE	ENSDARP00000056962	ENSP00000385687	ENSXETP00000050760	ENSGACP00000005673	ENSORLP00000022063	ENSDARP00000056962	ENSTRUP00000044567	ENSTNIP00000016990	ENSBTAP00000026195	ENSMUSP00000027498	FBpp0082840	ENSCSAVP00000012466	T19A5.2a	ENSCINP00000007311	ENSBTAT00000026189	1.00E-48	ENST00000370887	2.00E-52	ENSXETT00000011925	1.00E-52	ENSGACT00000005689	7.00E-50	ENSORLT00000022068	2.00E-38	ENSDART00000090316	6.00E-48
210	rud_dec_c14760	0.216337	4.86E-01	0.11574693	0.12432703	0.14607845	32	0.013428571	0.012975057	0.012793651	9.353141767860500E-04	0.9756022	8.849E-06	0.0243978	0.084945341	gene210	rud_dec_c14760	n-alpha-acetyltransferase auxiliary subunit-like		saccoglossus kowalevskii nmda receptor regulated 1-like mrna	naa16_mouse ame: full=n-alpha-acetyltransferase auxiliary subunit ame: full=nmda receptor-regulated 1-like protein short=narg1-like protein	F:molecular_function, F:binding, C:cellular_component	sp|Q5R4J9|NAA15_PONAB	ENSDARP00000015464	ENSP00000381920	ENSXETP00000036812	ENSGACP00000025944	ENSORLP00000002577	ENSDARP00000015464	ENSTRUP00000009343	ENSTNIP00000015310	ENSBTAP00000045426	ENSMUSP00000029303	FBpp0074480	ENSCSAVP00000001321	Y50D7A.4.2	ENSCINP00000010968	ENSBTAT00000048374	9.00E-55	ENST00000497727	1.00E-68	ENSXETT00000036814	3.00E-67	ENSGACT00000024474	2.00E-44	ENSORLT00000002578	1.00E-45	ENSDART00000017785	7.00E-53
213	rud_dec_c13371	0.049849134	2.43E-01	0.15595317	0.013436451	0.85642576	32	0.01584127	0.003269841	0.04414059	1.335622203334310E-01	0.7147668	6.48315E-06	0.2852332	0.398394015	gene213	rud_dec_c13371																			C33G8.2
215	rud_dec2_c2509	0.5636653	7.48E-01	0.19966874	0.97625035	0.42111787	32	0.018226757	0.049206349	0.026281179	2.484283364863690E-01	0.6181839	5.60711E-06	0.3818161	0.506408239	gene215	rud_dec2_c2509	hypothetical protein BRAFLDRAFT_125647 [Branchiostoma floridae]						ENSDARP00000108129	ENSP00000432606	ENSXETP00000008817	ENSGACP00000027326	ENSORLP00000007877				ENSBTAP00000023418	ENSMUSP00000083341
216	newAS_rud_dec_c29584	0.8593352	9.15E-01	0.46028465	0.8287897	0.75737065	32	0.030734694	0.044086168	0.040081633	1.573536397302170E-03	0.968358	8.78329E-06	0.031642	0.059237392	gene216	newAS_rud_dec_c29584
217	rud_dec_c20954	0.82011795	8.94E-01	0.42105266	0.85058254	0.8645752	32	0.029052154	0.044780045	0.044471655	1.218997635021420E-03	0.9721482	8.81767E-06	0.0278518	0.069396562	gene217	rud_dec_c20954
219	new_rud_dec2_c1577	0.74938196	8.51E-01	0.32156825	0.87517107	0.9797698	32	0.024566893	0.045696145	0.049219955	1.117337749121810E-03	0.9733344	8.82843E-06	0.0266656	0.074113694	gene219	new_rud_dec2_c1577			paphia euglypta complete genome
221	rud_dec_c24835	0.88545966	9.30E-01	0.59041286	0.68185645	0.48235384	32	0.035904762	0.038952381	0.028902494	7.498593006971530E-04	0.9781538	8.87214E-06	0.0218462	0.101011184	gene221	rud_dec_c24835	sarco endoplasmic reticulum calcium atpase isoform c	F:calciumtransporting ATPase activity, P:auxin biosynthetic process, C:integral to membrane, P:ATP biosynthetic process, F:ATP binding, P:calcium ion transport	pinctada fucata sarco endoplasmic reticulum calcium atpase isoform c complete alternatively spliced	atc_artsf ame: full=calcium-transporting atpase sarcoplasmic endoplasmic reticulum type ame: full=calcium pump	F:calciumtransporting ATPase activity, C:integral to membrane, P:ATP biosynthetic process, F:ATP binding, P:calcium ion transport, C:sarcoplasmic reticulum membrane	sp|P35316|ATC_ARTSF	ENSDARP00000113858	ENSP00000378872	ENSXETP00000045259	ENSGACP00000017760	ENSORLP00000019901	ENSDARP00000047200	ENSTRUP00000039923	ENSTNIP00000014393	ENSBTAP00000001838	ENSMUSP00000031423	FBpp0072126	ENSCSAVP00000018403	K11D9.2a.3	ENSCINP00000017038	ENSBTAT00000001838	2.00E-06					ENSGACT00000017795	2.00E-06
223	rud_dec_c17814	0.84715754	9.08E-01	0.65531397	0.51906717	0.973651	32	0.038172336	0.032603175	0.048929705	1.394442240439270E-03	0.9702121	8.80011E-06	0.0297879	0.063449666	gene223	rud_dec_c17814	glycogen debranching enzyme			gde_horse ame: full=glycogen debranching enzyme ame: full=glycogen debrancher includes: ame: full=4-alpha-glucanotransferase ame: full=oligo- - -glucantransferase includes: ame: full=amylo-alpha- -glucosidase short=amylo- -glucosidase ame: full=dextrin 6-alpha-d-glucosidase	P:carbohydrate metabolic process, F:protein binding, F:glycogen debranching enzyme activity, F:transferase activity, C:intracellular part	sp|A8BQB4|GDE_HORSE	ENSDARP00000096519	ENSP00000294724		ENSGACP00000019293	ENSORLP00000006843	ENSDARP00000099042	ENSTRUP00000032246	ENSTNIP00000021317	ENSBTAP00000008518	ENSMUSP00000044012	FBpp0289623	ENSCSAVP00000018522	R06A4.8	ENSCINP00000015173					ENSXETT00000028868	6.00E-07
224	rud_dec_c32689	0.7173491	8.32E-01	0.48495603	0.70018214	0.59812295	32	0.031668934	0.039555556	0.033836735	8.102254927280220E-04	0.9772917	8.86432E-06	0.0227083	0.095430267	gene224	rud_dec_c32689			salmo salar centromere protein m mrna
225	AS_rud_dec_c14481	0.39229596	6.37E-01	0.1361738	0.31312498	0.83432305	32	0.014671202	0.023369615	0.043365079	1.220016968090930E-03	0.9721366	8.81757E-06	0.0278634	0.069253271	gene225	AS_rud_dec_c14481	PREDICTED: hypothetical protein [Strongylocentrotus purpuratus]		danio rerio hypothetical loc570359 mrna	fa63a_danre ame: full=protein fam63a		sp|A3KQS4|FA63A_DANRE	ENSDARP00000004845	ENSP00000326194	ENSXETP00000017776	ENSGACP00000020869	ENSORLP00000010257	ENSDARP00000013233	ENSTRUP00000045581	ENSTNIP00000012201	ENSBTAP00000016444	ENSMUSP00000037035		ENSCSAVP00000009200			ENSBTAT00000033792	6.00E-07	ENST00000316848	2.00E-07	ENSXETT00000023734	2.00E-06					ENSDART00000027466	2.00E-09
226	newAS_rud_dec_c37865	0.6382904	7.89E-01	0.45974645	0.61430424	0.5557515	32	0.030712018	0.036517007	0.032117914	4.826721894346510E-04	0.982472	8.91131E-06	0.017528	0.138701467	gene226	newAS_rud_dec_c37865			candidatus phytoplasma mali strain at complete chromosome
229	rud_dec_c28522	0.03153648	1.97E-01	0.0155623	0.112687014	0.78005403	32	0.004553288	0.012077098	0.041043084	1.143483886494320E-03	0.9730243	8.82562E-06	0.0269757	0.072916415	gene229	rud_dec_c28522	serine threonine-protein kinase genghis khan-like isoform 2		platynereis dumerilii est ib0aaa26ch11em1	mrcka_mouse ame: full=serine threonine-protein kinase mrck alpha ame: full=cdc42-binding protein kinase alpha		sp|O54874|MRCKA_RAT	ENSDARP00000099367	ENSP00000335341	ENSXETP00000027888	ENSGACP00000006209	ENSORLP00000015950	ENSDARP00000076092	ENSTRUP00000017957	ENSTNIP00000004396	ENSBTAP00000012838	ENSMUSP00000106746	FBpp0072194		K08B12.5.1	ENSCINP00000016035	ENSBTAT00000021879	7.00E-09	ENST00000361246	5.00E-07
230	rud_dec_c24020	0.8224558	8.95E-01	0.53610086	0.68190247	0.7040836	32	0.033818594	0.038956916	0.037968254	3.527871425603730E-04	0.9850145	8.93437E-06	0.0149855	0.170469728	gene230	rud_dec_c24020	hypothetical protein BRAFLDRAFT_129914 [Branchiostoma floridae]		Branchiostoma floridae hypothetical protein. mRNA				ENSDARP00000099916
231	AS_rud_dec_c5777	0.5419007	7.34E-01	0.20852637	0.7434577	0.8820533	32	0.018721088	0.041179138	0.045315193	7.396052462240730E-04	0.9783037	8.8735E-06	0.0216963	0.102029998	gene231	AS_rud_dec_c5777			venerupis decussatus partial srp54 gene for signal recognition particle 54-kda clone exons a-b
232	rud_dec_c1094	0.2371669	5.06E-01	0.14400537	0.28284645	0.7904764	32	0.015170068	0.021882086	0.041528345	1.557632370826240E-01	0.6930875	6.28651E-06	0.3069125	0.424053207	gene232	rud_dec_c1094	gelsolin [Hirudo medicinalis]	F:actin binding		gels2_lumte ame: full=gelsolin-like protein 2 ame: full=actin-modulator short=ewam-p2	C:cytoplasm, C:cytoskeleton, F:actin binding, P:actin filament capping	sp|Q8MPM1|GELS2_LUMTE	ENSDARP00000044077	ENSP00000375962	ENSXETP00000042888	ENSGACP00000020663	ENSORLP00000015457	ENSDARP00000044077	ENSTRUP00000014841	ENSTNIP00000009768	ENSBTAP00000024683	ENSMUSP00000108639			K06A4.3						ENSXETT00000042888	3.00E-06
234	rud_dec2_c641	0.72225916	8.36E-01	0.53394574	0.9748875	0.4717052	32	0.03370068	0.049165533	0.028435374	4.589104968317760E-04	0.9829089	8.91527E-06	0.0170911	0.143922991	gene234	rud_dec2_c641	mam domain-containing protein 1	F:polysaccharide binding, F:scavenger receptor activity, C:membrane, P:immune response		mdga1_rat ame: full=mam domain-containing glycosylphosphatidylinositol anchor protein 1 ame: full=ig6m flags: precursor	P:central nervous system development, P:cell differentiation, C:plasma membrane	sp|P85171|MDGA1_RAT		ENSP00000422042							ENSBTAP00000044710	ENSMUSP00000126529		ENSCSAVP00000013619		ENSCINP00000026095
235	rud_dec_c32888	0.3191442	5.77E-01	0.7954704	0.40394226	0.101055965	32	0.043070295	0.027673469	0.010126984	7.595576487346980E-04	0.978013	8.87087E-06	0.021987	0.09969671	gene235	rud_dec_c32888			mus musculus bac clone rp24-281c21 from chromosome complete sequence
236	rud_dec2_c2187	0.40698326	6.48E-01	0.2820876	0.5712824	0.39388612	32	0.022589569	0.034920635	0.0250839	1.377059764308790E-03	0.9703983	8.8018E-06	0.0296017	0.064068239	gene236	rud_dec2_c2187			spisula solidissima gene for zinc finger protein sso- complete cds
237	rud_dec_c5639	0.7146475	8.30E-01	0.88723093	0.3126908	0.5211848	32	0.046272109	0.023342404	0.030707483	5.665319372383230E-05	0.9939945	9.01582E-06	0.0060055	0.387126471	gene237	rud_dec_c5639	hypothetical protein alr0750 [Nostoc sp. PCC 7120]	P:response to stress																ENSCSAVP00000002811		ENSCINP00000019364
238	newAS_rud_dec_c36986	0.53969496	7.33E-01	0.68950677	0.20280498	0.6820522	32	0.039365079	0.017596372	0.037056689	1.063752815696260E-03	0.9739814	8.8343E-06	0.0260186	0.077242938	gene238	newAS_rud_dec_c36986
239	rud_dec_c40149	0.7214313	8.35E-01	0.9414166	0.49157366	0.54041946	32	0.04814059	0.031492063	0.031519274	1.115719994686510E-04	0.9915723	8.99385E-06	0.0084277	0.300642515	gene239	rud_dec_c40149
240	newAS_rud_dec_c42733	0.14026697	3.96E-01	0.4812969	0.8808631	0.06724005	32	0.031537415	0.045904762	0.007913832	1.940625045989170E+00	0.1636007	1.48391E-06	0.8363993	0.896763883	gene240	newAS_rud_dec_c42733			venerupis decussatus partial srp54 gene for signal recognition particle 54-kda clone exons a-b
242	AS_rud_dec_c8695	0.22224027	4.90E-01	0.04630847	0.9709079	0.39274576	32	0.008258503	0.049029478	0.025020408	1.425905290318490E-03	0.9698781	8.79708E-06	0.0301219	0.062707026	gene242	AS_rud_dec_c8695	hypothetical protein. conserved in P. knowlesi [Plasmodium knowlesi strain H]			cylc2_bovin ame: full=cylicin-2 ame: full=cylicin ii ame: full=multiple-band polypeptide ii	P:cell differentiation, C:cytoplasm, C:cytoskeleton, P:multicellular organismal development, C:cytoskeletal calyx, P:spermatogenesis	sp|A2VD23|STM_DANRE	ENSDARP00000051767	ENSP00000416752	ENSXETP00000017487	ENSGACP00000010463	ENSORLP00000021486	ENSDARP00000051767	ENSTRUP00000030583	ENSTNIP00000000086	ENSBTAP00000020732	ENSMUSP00000068053	FBpp0291704	ENSCSAVP00000008499	F36H12.3	ENSCINP00000008026
244	rud_dec_c42728	0.446484	6.72E-01	0.5886976	0.6664589	0.19374204	32	0.035836735	0.038367347	0.015283447	2.060380974488480E+00	0.1511724	1.37118E-06	0.8488276	0.905246385	gene244	rud_dec_c42728	unnamed protein product [Tetraodon nigroviridis]		tetraodon nigroviridis full-length cdna	txn4b_human ame: full=thioredoxin-like protein 4b ame: full=dim1-like protein	P:RNA splicing, C:spliceosomal complex, P:mitosis, P:mRNA processing	sp|Q9NX01|TXN4B_HUMAN	ENSDARP00000076383	ENSP00000408130	ENSXETP00000046201	ENSGACP00000011212	ENSORLP00000006301	ENSDARP00000100887	ENSTRUP00000044137	ENSTNIP00000012311	ENSBTAP00000008329	ENSMUSP00000034159	FBpp0077125	ENSCSAVP00000004082			ENSBTAT00000008329	1.00E-74	ENST00000423037	1.00E-81	ENSXETT00000046201	2.00E-83			ENSORLT00000006302	1.00E-135	ENSDART00000081945	2.00E-87
245	AS_rud_dec_c27425	0.25422332	5.22E-01	0.06763906	0.6499482	0.1899263	32	0.010145125	0.037782313	0.015115646	8.725448730046990E-04	0.9764348	8.85655E-06	0.0235652	0.089664895	gene245	AS_rud_dec_c27425	hypothetical protein BRAFLDRAFT_287353 [Branchiostoma floridae]	F:oxidoreductase activity, P:oxidation reduction	Branchiostoma floridae hypothetical protein. mRNA	a16a1_bovin ame: full=aldehyde dehydrogenase family 16 member a1	F:oxidoreductase activity, P:oxidation reduction	sp|Q3T1L0|A16A1_RAT	ENSDARP00000111827	ENSP00000410142	ENSXETP00000007379	ENSGACP00000007887	ENSORLP00000020967	ENSDARP00000055282	ENSTRUP00000036635	ENSTNIP00000014080	ENSBTAP00000040728	ENSMUSP00000007977									ENSXETT00000007379	3.00E-10
246	rud_dec_c29902	0.2316834	5.00E-01	0.8327846	0.04391892	0.38454932	32	0.044453515	0.006834467	0.024603175	9.027768940052280E-02	0.7638244	6.92811E-06	0.2361756	0.338538835	gene246	rud_dec_c29902			calyptogena soyoae hb-ii gene for hemoglobin complete cds
247	new_rud_dec2_c2496	0.12266263	3.73E-01	0.84843224	0.11758216	0.22313216	32	0.045029478	0.012480726	0.016811791	3.464385371318030E-01	0.5561361	5.04432E-06	0.4438639	0.570113233	gene247	new_rud_dec2_c2496
248	AS_rud_dec_rep_c28895	0.07241416	2.89E-01	0.1440298	0.03769638	0.03292838	32	0.015174603	0.006263039	0.005011338	1.218137211935750E-04	0.991194	8.99042E-06	0.008806	0.288894458	gene248	AS_rud_dec_rep_c28895	hn1l protein	P:biological_process, C:cellular_component					ENSDARP00000103863			ENSGACP00000017210	ENSORLP00000014575	ENSDARP00000055779	ENSTRUP00000009113	ENSTNIP00000008147			FBpp0081149
249	AS_rud_dec_rep_c43455	0.003677449	7.11E-02	0.003265285	0.1168196	0.002044369	32	0.002190476	0.012417234	0.000725624	1.343431956115630E-03	0.9707618	8.8051E-06	0.0292382	0.065096481	gene249	AS_rud_dec_rep_c43455
250	rud_dec_c22162	0.003088306	6.39E-02	0.002442962	0.17783913	0.12937419	32	0.001882086	0.016222222	0.011800454	1.079134846346270E+00	0.2988912	2.71103E-06	0.7011088	0.797227388	gene250	rud_dec_c22162	mgc64596 protein			p2rx7_rat ame: full=p2x purinoceptor 7 short=p2x7 ame: full=atp receptor ame: full=p2z receptor ame: full=purinergic receptor	P:organelle organization, P:regulation of cell death, P:cellular component assembly, P:metal ion transport, P:signaling pathway, P:signal transmission, P:response to organic substance, P:positive regulation of protein secretion, P:positive regulation of cytokine production, C:plasma membrane, C:membrane part, P:cellular ion homeostasis, P:cellular protein metabolic process, P:cell communication, …	sp|Q64663|P2RX7_RAT	ENSDARP00000103963	ENSP00000261826				ENSDARP00000103963	ENSTRUP00000022167	ENSTNIP00000019842	ENSBTAP00000011779	ENSMUSP00000098303
251	AS_rud_dec_c1966	0.11194995	3.57E-01	0.04784508	0.48831284	0.26324865	32	0.008394558	0.031324263	0.018965986	2.967026551988280E-01	0.585957	5.3148E-06	0.414043	0.539734625	gene251	AS_rud_dec_c1966	arginine kinase	F:kinase activity	paphia undulata arginine kinase complete cds	karg_norma ame: full=arginine kinase short=ak	F:kinase activity, F:nucleotide binding	sp|P51544|KARG_HALMK	ENSDARP00000024900	ENSP00000410289	ENSXETP00000041410	ENSGACP00000006298	ENSORLP00000022417	ENSDARP00000024900	ENSTRUP00000018332	ENSTNIP00000002562	ENSBTAP00000001330	ENSMUSP00000022122	FBpp0076270	ENSCSAVP00000008611	ZC434.8.1	ENSCINP00000017993
252	rud_dec_c5547	0.13034065	3.85E-01	0.922798	0.035831966	0.76360077	32	0.047424036	0.006077098	0.040362812	2.041209886928070E+00	0.1530878	1.38855E-06	0.8469122	0.903728285	gene252	rud_dec_c5547	lim and sh3 domain protein		Caenorhabditis briggsae Hypothetical protein CBG18124 (CBG18124) mRNA. complete cds	lasp1_caeel ame: full=lim and sh3 domain protein	F:molecular_function, P:biological_process, C:cellular_component	sp|P34416|LASP1_CAEEL	ENSDARP00000051806	ENSP00000392853	ENSXETP00000036218	ENSGACP00000012390	ENSORLP00000003673	ENSDARP00000051806	ENSTRUP00000042277	ENSTNIP00000005587	ENSBTAP00000040793	ENSMUSP00000042123	FBpp0099495	ENSCSAVP00000004800	F42H10.3	ENSCINP00000004156	ENSBTAT00000043205	3.00E-20	ENST00000443937	1.00E-20			ENSGACT00000012414	3.00E-25	ENSORLT00000003674	5.00E-28	ENSDART00000032502	1.00E-20
253	rud_dec_c10553	0.37187567	6.20E-01	0.17246982	0.1734845	0.36457098	32	0.016730159	0.015941043	0.023655329	1.517857345447730E-03	0.9689225	8.78841E-06	0.0310775	0.060545649	gene253	rud_dec_c10553	translocase of inner mitochondrial membrane 10 homolog		saccoglossus kowalevskii translocase of inner mitochondrial membrane 10 homolog mrna	tim10_human ame: full=mitochondrial import inner membrane translocase subunit tim10	P:transmembrane transport, F:zinc ion binding, C:mitochondrial inner membrane presequence translocase complex, P:protein import into mitochondrial inner membrane, C:mitochondrial intermembrane space protein transporter complex, F:protein binding, P:sensory perception of sound	sp|P62074|TIM10_RAT	ENSDARP00000091094	ENSP00000433627	ENSXETP00000056930	ENSGACP00000024393	ENSORLP00000013699	ENSDARP00000091094	ENSTRUP00000037783	ENSTNIP00000002709	ENSBTAP00000034279	ENSMUSP00000107258	FBpp0071594	ENSCSAVP00000004262	Y66D12A.22.1		ENSBTAT00000034384	1.00E-09			ENSXETT00000056932	1.00E-20	ENSGACT00000024442	2.00E-11	ENSORLT00000013700	5.00E-06	ENSDART00000100321	8.00E-14
254	rud_dec2_c2427	0.2877495	5.53E-01	0.25917354	0.58964926	0.17456548	32	0.021342404	0.035632653	0.014349206	3.886524350150460E-03	0.9502905	8.61941E-06	0.0497095	0.079759508	gene254	rud_dec2_c2427			venerupis decussatus partial srp54 gene for signal recognition particle 54-kda clone exons a-b
256	rud_dec_c4408	0.3178458	5.77E-01	0.834061	0.091200255	0.8816425	32	0.044507937	0.010598639	0.045297052	9.361236530139640E-03	0.9229222	8.37118E-06	0.0770778	0.121845488	gene256	rud_dec_c4408			acyrthosiphon pisum f-box-like wd repeat-containing protein ebi-like mrna														FBpp0077715	ENSCSAVP00000015761			ENSBTAT00000029211	1.00E-06			ENSXETT00000066355	1.00E-07
258	rud_dec_c22578	0.01892896	1.54E-01	0.9792726	0.007080566	0.023700418	32	0.049351474	0.002195011	0.004018141	3.319560907015320E+00	0.06846011	6.20953E-07	0.93153989	0.959570527	gene258	rud_dec_c22578	lps-induced tnf-a factor		ruditapes philippinarum lps-induced tnf-a factor complete cds	litaf_chick ame: full=lipopolysaccharide-induced tumor necrosis factor-alpha factor homolog short=lps-induced tnf-alpha factor homolog ame: full=small integral membrane protein of lysosome late endosome	C:cytoplasm, P:regulation of transcription	sp|Q8QGW7|LITAF_CHICK	ENSDARP00000069049	ENSP00000384800	ENSXETP00000053520	ENSGACP00000018452	ENSORLP00000014581	ENSDARP00000069049	ENSTRUP00000029802	ENSTNIP00000017085	ENSBTAP00000007391	ENSMUSP00000112667	FBpp0072896		F36G3.3	ENSCINP00000027788
259	new_rud_dec_rep_c41009	0.70653456	8.27E-01	0.5820733	0.6258963	0.54528	32	0.035619048	0.036911565	0.031750567	4.579589113404830E-04	0.9829266	8.91543E-06	0.0170734	0.144104202	gene259	new_rud_dec_rep_c41009
260	newAS_rud_dec_c25336	0.018703636	1.53E-01	0.003740738	0.063790984	0.1200359	32	0.002340136	0.008512472	0.011238095	1.696788637417510E-03	0.9671428	8.77227E-06	0.0328572	0.057334956	gene260	newAS_rud_dec_c25336
261	new_rud_dec_c42971	0.30355734	5.65E-01	0.09902698	0.99887246	0.23861277	32	0.012217687	0.049950113	0.017650794	1.622425717414440E-03	0.9678704	8.77887E-06	0.0321296	0.058298696	gene261	new_rud_dec_c42971																			F52H3.3
262	rud_dec_c17286	0.48683774	6.98E-01	0.28859982	0.5066847	0.611499	32	0.022920635	0.032126984	0.034326531	1.168052330683620E-03	0.9727362	8.823E-06	0.0272638	0.071554492	gene262	rud_dec_c17286	hypothetical protein BRAFLDRAFT_122376 [Branchiostoma floridae]	F:NAD+ ADPribosyltransferase activity, C:intracellular							ENSXETP00000054966						ENSBTAP00000042099					ENSCINP00000008967
263	AS_rud_dec_c13723	0.14830543	4.07E-01	0.13218786	0.046535306	0.5528667	32	0.014403628	0.007147392	0.032004535	1.467433767157890E-01	0.7016671	6.36433E-06	0.2983329	0.413806915	gene263	AS_rud_dec_c13723	tubby homolog		schistosoma mansoni tubby-like complete cds	tub_mouse ame: full=tubby protein	F:Gprotein coupled photoreceptor activity, P:phagocytosis, P:sensory perception of sound, C:plasma membrane, P:phototransduction, F:protein binding, C:extracellular region, C:nucleus, C:cytosol	sp|O88808|TUB_RAT	ENSDARP00000087668	ENSP00000299506	ENSXETP00000042621	ENSGACP00000020640	ENSORLP00000020183	ENSDARP00000087668	ENSTRUP00000044538	ENSTNIP00000004681	ENSBTAP00000006391	ENSMUSP00000113580	FBpp0088556	ENSCSAVP00000011200	F10B5.4	ENSCINP00000013143											ENSDART00000089574	2.00E-09
264	rud_dec_c6467	0.23673238	5.05E-01	0.39985165	0.19263488	0.05555302	32	0.028222222	0.01706576	0.007043084	1.210198055105130E-03	0.9722489	8.81858E-06	0.0277511	0.069952064	gene264	rud_dec_c6467			venerupis decussatus epic-pcr fragment clone 6d
266	rud_dec_c9099	0.2500202	5.18E-01	0.8639621	0.20831642	0.066805415	32	0.045528345	0.017891156	0.007891156	1.518998563483360E-04	0.9901665	8.9811E-06	0.0098335	0.265023644	gene266	rud_dec_c9099										ENSGACP00000026861	ENSORLP00000012070		ENSTRUP00000030185	ENSTNIP00000014785
267	AS_rud_dec2_c212	0.11680532	3.65E-01	0.07762523	0.057946097	0.69200766	32	0.010861678	0.008040816	0.037410431	7.237374353508130E-05	0.9932123	9.00873E-06	0.0067877	0.349629986	gene267	AS_rud_dec2_c212	prefoldin 5		bos taurus prefoldin subunit mrna (cdna clone mgc:127075 image:7943026) complete cds	pfd5_ponab ame: full=prefoldin subunit 5	C:intracellular part	sp|Q5RAY0|PFD5_PONAB	ENSDARP00000049721	ENSP00000334188	ENSXETP00000027719	ENSGACP00000000883	ENSORLP00000002213	ENSDARP00000049721	ENSTRUP00000017575	ENSTNIP00000003531	ENSBTAP00000011762	ENSMUSP00000129178	FBpp0083650		R151.9.1		ENSBTAT00000011762	3.00E-29	ENST00000334478	1.00E-23	ENSXETT00000027719	3.00E-09			ENSORLT00000002214	1.00E-26	ENSDART00000049722	2.00E-27
270	rud_dec_rep_c34096	0.02235098	1.66E-01	0.021688046	0.16881227	0.3951163	32	0.005460317	0.015650794	0.025120181	6.094510543232440E-02	0.8050084	7.30166E-06	0.1949916	0.286356569	gene270	rud_dec_rep_c34096	sialic acid-binding lectin	F:sugar binding	venerupis philippinarum sialic acid-binding lectin complete cds
271	rud_dec_c12085	0.531531	7.28E-01	0.45549485	0.4034941	0.5255067	32	0.030526077	0.027659864	0.030902494	1.763059276527200E-04	0.989406	8.9742E-06	0.010594	0.247410301	gene271	rud_dec_c12085	thioredoxin-like protein		monodelphis domestica thioredoxin-like protein 1-like mrna	txnl1_mouse ame: full=thioredoxin-like protein 1 ame: full=32 kda thioredoxin-related protein		sp|Q8CDN6|TXNL1_MOUSE	ENSDARP00000023934	ENSP00000217515	ENSXETP00000045160	ENSGACP00000000829	ENSORLP00000018808	ENSDARP00000023934	ENSTRUP00000000329	ENSTNIP00000005087	ENSBTAP00000020880	ENSMUSP00000025476	FBpp0076804	ENSCSAVP00000017134	Y54E10A.3	ENSCINP00000025508	ENSBTAT00000020880	5.00E-18	ENST00000217515	2.00E-24
272	AS_rud_dec_c1212	0.56702876	7.50E-01	0.25928587	0.40106025	0.98190874	32	0.021351474	0.02753288	0.049301587	1.943151180346940E-01	0.6593492	5.98049E-06	0.3406508	0.462153079	gene272	AS_rud_dec_c1212	PREDICTED: hypothetical protein [Strongylocentrotus purpuratus]		pediculus humanus corporis transmembrane mrna	tmm11_danre ame: full=transmembrane protein mitochondrial	F:molecular_function, C:integral to membrane, C:membrane	sp|Q6NWH5|TMM11_DANRE	ENSDARP00000095170	ENSP00000319992	ENSXETP00000013332	ENSGACP00000017169	ENSORLP00000014429	ENSDARP00000095170	ENSTRUP00000021311	ENSTNIP00000014573	ENSBTAP00000013971	ENSMUSP00000128654	FBpp0289217	ENSCSAVP00000014633		ENSCINP00000004008
273	newAS_rud_dec_rep_c31962	0.11439464	3.61E-01	0.035772875	0.4555393	0.070617825	32	0.007274376	0.029927438	0.008204082	3.240385802882880E-05	0.9954581	9.0291E-06	0.0045419	0.397344156	gene273	newAS_rud_dec_rep_c31962			venerupis decussata satellite vde023m sequence
275	AS_rud_dec_c40253	0.63018125	7.84E-01	0.32071415	0.54745334	0.85080284	32	0.024507937	0.033918367	0.043954649	1.143077389144760E-03	0.9730291	8.82566E-06	0.0269709	0.07297502	gene275	AS_rud_dec_c40253			venerupis decussatus epic-pcr fragment clone c7
279	AS_rud_dec_c11502	0.0434051	2.27E-01	0.75224125	0.019921537	0.023506872	32	0.041555556	0.004244898	0.004004535	8.245701336534230E-03	0.9276469	8.41403E-06	0.0723531	0.114656156	gene279	AS_rud_dec_c11502	hypothetical protein BRAFLDRAFT_117283 [Branchiostoma floridae]	P:cellcell signaling, P:multicellular organismal development
280	AS_rud_dec_c10654	0.052418347	2.47E-01	0.00637587	0.4388495	0.29509696	32	0.002947846	0.029156463	0.020390023	8.987307154484360E-04	0.9760839	8.85337E-06	0.0239161	0.087758712	gene280	AS_rud_dec_c10654			venerupis decussatus partial srp54 gene for signal recognition particle 54-kda clone exons a-b
281	rud_dec_c7268	0.7180321	8.33E-01	0.6108655	0.68221015	0.42209217	32	0.036675737	0.038984127	0.026321995	1.148096654787870E-03	0.97297	8.82512E-06	0.02703	0.072600314	gene281	rud_dec_c7268	sjchgc05919 protein	F:rRNA (adenineN6.N6)dimethyltransferase activity, P:rRNA modification, F:rRNA methyltransferase activity	Plasmodium falciparum 3D7 conserved Plasmodium protein. unknown function (PF14_0458) mRNA. complete cds	tfb1m_xenla ame: full=dimethyladenosine transferase mitochondrial ame: full=mitochondrial 12s rrna dimethylase 1 ame: full=mitochondrial transcription factor b1 short=mttfb1 ame: full=s-adenosylmethionine-6-n n -adenosyl dimethyltransferase 1 flags: precursor	P:cellular macromolecule metabolic process, P:gene expression, P:nucleic acid metabolic process, F:methyltransferase activity	sp|Q7T0W5|TFB1M_XENLA	ENSDARP00000124704		ENSXETP00000017166		ENSORLP00000021673		ENSTRUP00000024475		ENSBTAP00000042644
282	rud_dec2_c349	0.2877155	5.53E-01	0.8030706	0.15027568	0.15547481	32	0.043378685	0.014548753	0.013283447	1.073478052944660E-03	0.9738628	8.83322E-06	0.0261372	0.076788474	gene282	rud_dec2_c349	mgc84052 protein		xenopus laevis proteasome ( macropain) 26s non- 7 mrna	psd7_human ame: full=26s proteasome non-atpase regulatory subunit 7 ame: full=26s proteasome regulatory subunit rpn8 ame: full=26s proteasome regulatory subunit s12 ame: full=mov34 protein homolog ame: full=proteasome subunit p40	P:negative regulation of ubiquitinprotein ligase activity during mitotic cell cycle, C:proteasome regulatory particle, P:anaphasepromoting complexdependent proteasomal ubiquitindependent protein catabolic process, P:positive regulation of ubiquitinprotein ligase activity during mitotic cell cycle, F:protein binding	sp|P51665|PSD7_HUMAN	ENSDARP00000089001	ENSP00000219313	ENSXETP00000038770	ENSGACP00000016105	ENSORLP00000013054	ENSDARP00000089001	ENSTRUP00000027262	ENSTNIP00000015074	ENSBTAP00000024515	ENSMUSP00000041968	FBpp0072197	ENSCSAVP00000008625	R12E2.3.1	ENSCINP00000022547	ENSBTAT00000024515	2.00E-143	ENST00000219313	7.00E-133	ENSXETT00000038770	2.00E-150	ENSGACT00000016136	1.00E-108	ENSORLT00000013055	2.00E-122	ENSDART00000098229	8.00E-120
283	new_rud_dec_c27637	0.6073679	7.74E-01	0.3878178	0.25294697	0.41433492	32	0.027687075	0.020217687	0.025959184	1.373822990728960E-03	0.9704331	8.80211E-06	0.0295669	0.064194591	gene283	new_rud_dec_c27637																		ENSCSAVP00000014097
285	rud_dec_c17187	0.3110535	5.70E-01	0.93971646	0.11737748	0.65624493	32	0.048058957	0.01246712	0.036045351	9.000052386909370E-05	0.9924307	9.00164E-06	0.0075693	0.322148239	gene285	rud_dec_c17187	hypothetical protein DAPPUDRAFT_63727 [Daphnia pulex]			klkb1_rat ame: full=plasma kallikrein ame: full=fletcher factor ame: full=kininogenin ame: full=plasma prekallikrein contains: ame: full=plasma kallikrein heavy chain contains: ame: full=plasma kallikrein light chain flags: precursor	C:cytoplasm, C:extracellular space, P:plasminogen activation, P:positive regulation of fibrinolysis	sp|P14272|KLKB1_RAT	ENSDARP00000085529	ENSP00000426629	ENSXETP00000013769	ENSGACP00000004011	ENSORLP00000010944	ENSDARP00000085529	ENSTRUP00000021509	ENSTNIP00000003911	ENSBTAP00000048355	ENSMUSP00000026907	FBpp0112081	ENSCSAVP00000001468	C07G1.1
286	rud_dec_rep_c20119	0.7877374	8.74E-01	0.42996028	0.981789	0.7095407	32	0.02939229	0.04939229	0.038199546	1.005862330316630E-03	0.9746991	8.84081E-06	0.0253009	0.080721222	gene286	rud_dec_rep_c20119	predicted protein [Thalassiosira pseudonana CCMP1335]
289	AS_rud_dec_c2409	0.24681556	5.15E-01	0.09820522	0.8788852	0.53573406	32	0.012145125	0.045845805	0.031278912	9.602051354704590E-04	0.9752798	8.84608E-06	0.0247202	0.08376599	gene289	AS_rud_dec_c2409	hypothetical protein DAPPUDRAFT_304977 [Daphnia pulex]			tdrd1_mouse ame: full=tudor domain-containing protein 1		sp|Q99MV1|TDRD1_MOUSE	ENSDARP00000112868	ENSP00000355924	ENSXETP00000054512	ENSGACP00000010894	ENSORLP00000020927	ENSDARP00000006141	ENSTRUP00000034771	ENSTNIP00000014598	ENSBTAP00000009002	ENSMUSP00000107231	FBpp0075628	ENSCSAVP00000002800	R06F6.4.1	ENSCINP00000003840
290	rud_dec_c167	0.88229287	9.28E-01	0.5604243	0.70667434	0.4884416	32	0.03476644	0.039804989	0.029165533	1.806108351956930E-03	0.9661014	8.76282E-06	0.0338986	0.05685701	gene290	rud_dec_c167	epsilon subunit of atp synthetase	F:hydrogen ion transmembrane transporter activity		atp5e_bovin ame: full=atp synthase subunit mitochondrial short=atpase subunit epsilon	F:hydrogen ion transmembrane transporter activity, C:mitochondrial inner membrane, P:proton transport	sp|P05632|ATP5E_BOVIN	ENSDARP00000124085	ENSP00000379019							ENSBTAP00000051455	ENSMUSP00000016396	FBpp0073963		F32D1.2.1	ENSCINP00000023193
291	AS_rud_dec_c33714	0.03101044	1.96E-01	0.5668555	0.008505506	0.15595518	32	0.0350839	0.00244898	0.013315193	1.953200940264480E+00	0.1622423	1.47159E-06	0.8377577	0.897434706	gene291	AS_rud_dec_c33714	hypothetical protein BRAFLDRAFT_66495 [Branchiostoma floridae]	F:GTP binding, F:GTPase binding, F:guanylnucleotide exchange factor activity		dock3_mouse ame: full=dedicator of cytokinesis protein 3 ame: full=modifier of cell adhesion ame: full=presenilin-binding protein short=pbp	F:protein binding, C:cell part	sp|Q8CIQ7|DOCK3_MOUSE	ENSDARP00000123474	ENSP00000266037	ENSXETP00000011369	ENSGACP00000000019	ENSORLP00000012502	ENSDARP00000021649	ENSTRUP00000019278	ENSTNIP00000021047	ENSBTAP00000032659	ENSMUSP00000047652	FBpp0288435	ENSCSAVP00000001882		ENSCINP00000015199
293	rud_dec_c38820	0.007826731	1.00E-01	0.001182755	0.083188474	0.06506872	32	0.001351474	0.010022676	0.007764172	1.465487762004610E-03	0.9694631	8.79332E-06	0.0305369	0.061729002	gene293	rud_dec_c38820	unnamed protein product [Tetraodon nigroviridis]		oncorhynchus mykiss udp-n-acetylglucosamine transferase subunit alg13 mrna	alg13_rat ame: full=udp-n-acetylglucosamine transferase subunit alg13 homolog ame: full=glycosyltransferase 28 domain-containing protein 1	P:lipid glycosylation, F:carbohydrate binding, P:carbohydrate metabolic process, C:endoplasmic reticulum, F:transferase activity. transferring hexosyl groups	sp|Q5I0K7|ALG13_RAT	ENSDARP00000017010	ENSP00000361047	ENSXETP00000050588	ENSGACP00000022480		ENSDARP00000017010	ENSTRUP00000031926	ENSTNIP00000019928	ENSBTAP00000006020	ENSMUSP00000033643	FBpp0084782	ENSCSAVP00000015498	R10D12.12	ENSCINP00000026833							ENSGACT00000022522	5.00E-08
294	AS_rud_dec_rep_c12885	0.52648216	7.25E-01	0.30062667	0.9257828	0.21945618	32	0.023519274	0.04739229	0.01662585	8.245436987408530E-04	0.977092	8.86251E-06	0.022908	0.094398087	gene294	AS_rud_dec_rep_c12885
295	rud_dec_c17647	0.87089837	9.21E-01	0.6594278	0.5983815	0.8077651	32	0.038331066	0.035927438	0.042258503	1.352751192257520E-03	0.9706606	8.80418E-06	0.0293394	0.064941407	gene295	rud_dec_c17647
296	rud_dec2_c618	0.15334068	4.13E-01	0.8068335	0.164678	0.053399567	32	0.04352381	0.015464853	0.006879819	1.099422819947900E-03	0.973549	8.83038E-06	0.026451	0.07510803	gene296	rud_dec2_c618	probable l-asparaginase ga20639-like		gasterosteus aculeatus clone cnb11-d03 mrna sequence	asgx_pyrho ame: full= l-asparaginase ame: full=l-asparagine amidohydrolase contains: ame: full= l-asparaginase subunit alpha contains: ame: full= l-asparaginase subunit beta flags: precursor	F:asparaginase activity, F:peptidase activity	sp|O57971|ASGX_PYRHO	ENSDARP00000051885	ENSP00000301776	ENSXETP00000020772	ENSGACP00000008046	ENSORLP00000012747	ENSDARP00000033788	ENSTRUP00000040336	ENSTNIP00000000285	ENSBTAP00000009073	ENSMUSP00000051709	FBpp0073861	ENSCSAVP00000013817	R04B3.2	ENSCINP00000004442							ENSGACT00000008081	4.00E-13
297	newAS_rud_dec_c16121	0.109362796	3.54E-01	0.45594376	0.18634517	0.017600698	32	0.030548753	0.016730159	0.003287982	2.440831810872620E-04	0.987535	8.95723E-06	0.012465	0.205999543	gene297	newAS_rud_dec_c16121			spisula solidissima gene for zinc finger protein sso- complete cds
298	rud_dec_c8508	0.40957654	6.50E-01	0.20785788	0.48604372	0.65209603	32	0.018666667	0.031219955	0.035913832	1.516786150773440E-03	0.9689335	8.78851E-06	0.0310665	0.060599191	gene298	rud_dec_c8508	beta-ig-h3 fasciclin			y1483_syny3 ame: full=uncharacterized protein sll1483 flags: precursor	C:outer membranebounded periplasmic space	sp|P74615|Y1483_SYNY3	ENSDARP00000120855	ENSP00000258495	ENSXETP00000032971	ENSGACP00000027192	ENSORLP00000022910	ENSDARP00000018627	ENSTRUP00000008509	ENSTNIP00000003990	ENSBTAP00000012519	ENSMUSP00000103617	FBpp0080174
299	rud_dec_c721	0.6461762	7.94E-01	0.36563417	0.28427675	0.60784924	32	0.026725624	0.021963719	0.034199546	1.398623744307760E-03	0.9701675	8.79971E-06	0.0298325	0.063373222	gene299	rud_dec_c721	c1q domain containing protein 1q70			emil2_mouse ame: full=emilin-2 ame: full=basilin ame: full=elastin microfibril interface-located protein 2 short=elastin microfibril interfacer 2 flags: precursor	C:proteinaceous extracellular matrix, C:extracellular region	sp|B2RPV6|MMRN1_MOUSE	ENSDARP00000123232	ENSP00000378432	ENSXETP00000024449	ENSGACP00000011804	ENSORLP00000002057	ENSDARP00000016790	ENSTRUP00000034386	ENSTNIP00000001156	ENSBTAP00000013581	ENSMUSP00000119609
300	rud_dec_c20286	0.33233634	5.88E-01	0.36590418	0.8692204	0.20725612	32	0.026739229	0.045451247	0.01600907	1.233484202430190E-03	0.9719833	8.81618E-06	0.0280167	0.068521874	gene300	rud_dec_c20286	hypothetical protein SINV_08633 [Solenopsis invicta]
301	rud_dec_c7059	0.09200464	3.27E-01	0.70336705	0.07938837	0.049671914	32	0.039823129	0.009777778	0.00660771	1.743963152095480E-01	0.6762339	6.13364E-06	0.3237661	0.443448524	gene301	rud_dec_c7059	tpa_inf: hn1-like protein						ENSDARP00000103863	ENSP00000372157		ENSGACP00000017210	ENSORLP00000014575	ENSDARP00000055779	ENSTRUP00000009113	ENSTNIP00000008147		ENSMUSP00000021083	FBpp0081149
302	rud_dec_c14508	0.20395914	4.74E-01	0.91622657	0.7545516	0.049008198	32	0.04724263	0.041564626	0.006544218	5.972303248995550E-04	0.980503	8.89345E-06	0.019497	0.119132722	gene302	rud_dec_c14508			venerupis decussatus partial srp54 gene for signal recognition particle 54-kda clone exons a-b
303	AS_rud_dec_c21619	0.80164397	8.83E-01	0.49620816	0.47151324	0.9994478	32	0.03214966	0.030698413	0.049972789	1.012584165209770E-03	0.9746147	8.84004E-06	0.0253853	0.08008648	gene303	AS_rud_dec_c21619							ENSDARP00000099464		ENSXETP00000024409		ENSORLP00000006535	ENSDARP00000099464	ENSTRUP00000039680	ENSTNIP00000016001			FBpp0081767	ENSCSAVP00000007418		ENSCINP00000021871
304	AS_rud_dec2_rep_c3305	2.55E-04	1.73E-02	0.000556366	0.003469817	0.000427102	32	0.0009161	0.001460317	0.000303855	1.322631785910740E-03	0.9709889	8.80716E-06	0.0290111	0.065759686	gene304	AS_rud_dec2_rep_c3305	sodium-calcium exchanger	F:lipid binding, F:binding, P:transport, F:transporter activity		fabp4_cerel ame: full=fatty acid-binding adipocyte ame: full=adipocyte-type fatty acid-binding protein short=a-fabp short=afabp ame: full=fatty acid-binding protein 4	F:lipid binding, F:binding, C:cytoplasm, P:transport, C:nucleus, F:transporter activity	sp|P11404|FABPH_MOUSE	ENSDARP00000018865	ENSP00000256104	ENSXETP00000050332	ENSGACP00000013437	ENSORLP00000013510	ENSDARP00000018865	ENSTRUP00000037842	ENSTNIP00000020354	ENSBTAP00000022375	ENSMUSP00000070709	FBpp0099726	ENSCSAVP00000005960	W02D3.5.1	ENSCINP00000026694
306	rud_dec_rep_c44295	0.6465345	7.93E-01	0.34456554	0.3754499	0.35095072	32	0.025678005	0.026394558	0.023029478	1.386402180401090E-03	0.9702981	8.80089E-06	0.0297019	0.063660129	gene306	rud_dec_rep_c44295			macaca mulatta 60s ribosomal protein l7-like miscrna			sp|P05426|RL7_RAT	ENSDARP00000018980	ENSP00000379733	ENSXETP00000054267	ENSGACP00000003638	ENSORLP00000009997	ENSDARP00000018980	ENSTRUP00000003523	ENSTNIP00000011009	ENSBTAP00000025959	ENSMUSP00000118695	FBpp0079536	ENSCSAVP00000004215	F53G12.10.3	ENSCINP00000014795	ENSBTAT00000025959	1.00E-11	ENST00000396470	7.00E-16					ENSORLT00000009998	2.00E-07	ENSDART00000019149	6.00E-11
308	rud_dec_c11777	0.48946887	7.00E-01	0.31592563	0.6452722	0.4954012	32	0.024285714	0.037632653	0.029496599	1.603751070717860E-03	0.9680558	8.78055E-06	0.0319442	0.058628191	gene308	rud_dec_c11777	sphingomyelin phosphodiesterase. putative [Pediculus humanus corporis]		pediculus humanus corporis sphingomyelin mrna	asm_human ame: full=sphingomyelin phosphodiesterase ame: full=acid sphingomyelinase short=asmase flags: precursor	P:sphingomyelin metabolic process, P:nervous system development, P:signal transduction	sp|P17405|ASM_HUMAN	ENSDARP00000124101	ENSP00000349203	ENSXETP00000050330	ENSGACP00000027235	ENSORLP00000005827	ENSDARP00000100095	ENSTRUP00000027470	ENSTNIP00000012850	ENSBTAP00000020758	ENSMUSP00000042187	FBpp0072173	ENSCSAVP00000004491	ZK455.4.1	ENSCINP00000006326
310	rud_dec_c12822	0.16706958	4.31E-01	0.4018106	0.27828196	0.102649115	32	0.028326531	0.021637188	0.010226757	1.238914276029840E-03	0.9719217	8.81562E-06	0.0280783	0.068369141	gene310	rud_dec_c12822	conserved unknown protein [Ectocarpus siliculosus]			ymso_caeel ame: full=upf0046 protein flags: precursor		sp|Q21268|YMSO_CAEEL	ENSDARP00000110297	ENSP00000390379	ENSXETP00000046227	ENSGACP00000025541	ENSORLP00000014683	ENSDARP00000050477	ENSTRUP00000023826	ENSTNIP00000008415	ENSBTAP00000047581	ENSMUSP00000131679	FBpp0076121	ENSCSAVP00000002470	K07C11.7a	ENSCINP00000001287
311	rud_dec_c24807	0.34817103	6.01E-01	0.8841134	0.18686412	0.47965539	32	0.0461678	0.016752834	0.028780045	3.018860116316090E-01	0.5827025	5.28528E-06	0.4172975	0.543206228	gene311	rud_dec_c24807			anolis carolinensis ubiquitin carboxyl-terminal hydrolase 4-like mrna			sp|Q8R5H1|UBP15_MOUSE	ENSDARP00000039867	ENSP00000280377	ENSXETP00000013039	ENSGACP00000025112	ENSORLP00000001238	ENSDARP00000039867	ENSTRUP00000012031	ENSTNIP00000017645	ENSBTAP00000037402	ENSMUSP00000020334									ENSXETT00000013039	2.00E-14
312	AS_rud_dec_c19652	0.009625399	1.10E-01	0.9677643	0.011153019	0.16428693	32	0.048975057	0.002947846	0.013823129	2.687001098239980E+00	0.1011701	9.17643E-07	0.8988299	0.939039142	gene312	AS_rud_dec_c19652	coiled-coil domain containing 89-like			ccd89_bovin ame: full=coiled-coil domain-containing protein 89	C:nucleus, F:protein binding, C:cytoplasm	sp|Q8N998|CCD89_HUMAN	ENSDARP00000058247	ENSP00000320649	ENSXETP00000009629	ENSGACP00000006914	ENSORLP00000021440	ENSDARP00000058247			ENSBTAP00000000582	ENSMUSP00000060309
314	rud_dec_c12896	0.5538519	7.42E-01	0.30097944	0.51232684	0.70525384	32	0.023537415	0.032321995	0.038018141	1.556800099479000E-03	0.9685266	8.78482E-06	0.0314734	0.059620431	gene314	rud_dec_c12896	AF468016_1alpha-amylase [Corbicula fluminea]	F:hydrolase activity. acting on glycosyl bonds, P:carbohydrate metabolic process, F:cation binding	corbicula fluminea alpha-amylase complete cds	amy_pseha ame: full=alpha-amylase ame: full= -alpha-d-glucan glucanohydrolase flags: precursor	F:catalytic activity	sp|P29957|AMY_PSEHA													C50B6.7
315	rud_dec_c7038	0.010970812	1.16E-01	0.026945693	0.037271008	0.60737586	32	0.00615873	0.006222222	0.034176871	3.495055486589300E+00	0.06155235	5.58298E-07	0.93844765	0.963444952	gene315	rud_dec_c7038																							ENST00000519259	1.00E-10	ENSXETT00000049555	8.00E-10
316	rud_dec2_rep_c2623	0.14829755	4.07E-01	0.26937112	0.64654785	0.10409912	32	0.021895692	0.037673469	0.010331066	1.759192296942160E-01	0.6749039	6.12158E-06	0.3250961	0.444993705	gene316	rud_dec2_rep_c2623	PREDICTED: predicted protein-like. partial [Saccoglossus kowalevskii]		venerupis decussatus partial srp54 gene for signal recognition particle 54-kda clone exons a-b	hsp13_bovin ame: full=heat shock 70 kda protein 13 ame: full=stress-70 protein chaperone microsome-associated 60 kda protein flags: precursor	F:ATP binding, F:nucleotide binding, C:endoplasmic reticulum, C:microsome	sp|Q5R8D9|HSP13_PONAB	ENSDARP00000060048	ENSP00000285667	ENSXETP00000012873	ENSGACP00000008388	ENSORLP00000017832	ENSDARP00000060048	ENSTRUP00000020642	ENSTNIP00000008928	ENSBTAP00000017155	ENSMUSP00000048817	FBpp0073448	ENSCSAVP00000010978	F54C9.2	ENSCINP00000019500
318	new_rud_dec_c31472	0.26799822	5.36E-01	0.063328564	0.84649503	0.8208008	32	0.009768707	0.04462585	0.042825397	6.085797681976140E-04	0.9803187	8.89178E-06	0.0196813	0.117395546	gene318	new_rud_dec_c31472			apis mellifera very long-chain specific acyl- mitochondrial-like mrna
319	AS_rud_dec_c8847	0.004663425	8.00E-02	0.00168192	0.8698243	0.3922707	32	0.001605442	0.045469388	0.024975057	1.300757119321360E-02	0.9091976	8.24669E-06	0.0908024	0.142276454	gene319	AS_rud_dec_c8847						sp|P46940|IQGA1_HUMAN	ENSDARP00000098704	ENSP00000268182		ENSGACP00000023048	ENSORLP00000000201	ENSDARP00000078504	ENSTRUP00000034912		ENSBTAP00000017366	ENSMUSP00000032751
320	AS_rud_dec_c22786	7.65E-05	9.37E-03	0.000705974	7.25811E-05	0.001957648	32	0.001038549	0.00014966	0.000721088	7.926891249859400E-01	0.3732882	3.38583E-06	0.6267118	0.735545589	gene320	AS_rud_dec_c22786																															ENSDART00000105284	9.00E-07
321	AS_rud_dec_c32884	0.657484	7.99E-01	0.52488434	0.5448576	0.5742234	32	0.033337868	0.033786848	0.032829932	8.012431711108540E-04	0.9774179	8.86547E-06	0.0225821	0.096109069	gene321	AS_rud_dec_c32884	stress-induced-phosphoprotein 1 (hsc70 hsp90-organizing protein)			stip1_macfa ame: full=stress-induced-phosphoprotein 1 short=sti1 ame: full=hsc70 hsp90-organizing protein short=hop	F:binding, C:cytoplasm, C:nucleus	sp|Q4R8N7|STIP1_MACFA	ENSDARP00000100503	ENSP00000351646	ENSXETP00000015637	ENSGACP00000026788	ENSORLP00000013613	ENSDARP00000041440	ENSTRUP00000007479	ENSTNIP00000012798	ENSBTAP00000020809	ENSMUSP00000025918	FBpp0076382	ENSCSAVP00000003169	R05F9.10
322	rud_dec_c2726	0.13565493	3.90E-01	0.023763042	0.38614503	0.6695118	32	0.005736961	0.026857143	0.036562358	6.486727140782020E-04	0.9796808	8.88599E-06	0.0203192	0.111321343	gene322	rud_dec_c2726	non-erythrocytic 1 (alpha-fodrin)			spta2_chick ame: full=spectrin alpha brain ame: full=fodrin alpha chain ame: full= non-erythroid alpha chain	F:calmodulin binding, C:cytoskeleton, F:calcium ion binding, C:cell cortex, F:actin binding, P:actin filament capping	sp|P07751|SPTA2_CHICK	ENSDARP00000093029	ENSP00000350882		ENSGACP00000024350	ENSORLP00000016059	ENSDARP00000093032	ENSTRUP00000036003	ENSTNIP00000005711	ENSBTAP00000020395	ENSMUSP00000109348	FBpp0072672	ENSCSAVP00000009339
323	AS_rud_dec_c40874	0.9656494	9.78E-01	0.6110229	0.8963771	0.839597	32	0.036684807	0.046462585	0.043564626	1.566677560779850E+00	0.2106902	1.91102E-06	0.7893098	0.864351473	gene323	AS_rud_dec_c40874	hypothetical protein BRAFLDRAFT_92063 [Branchiostoma floridae]		Branchiostoma floridae hypothetical protein. mRNA	ccd93_xentr ame: full=coiled-coil domain-containing protein 93		sp|Q640U7|CCD93_XENTR	ENSDARP00000059573	ENSP00000324135		ENSGACP00000001928	ENSORLP00000025796	ENSDARP00000059573	ENSTRUP00000036120	ENSTNIP00000008657	ENSBTAP00000050750	ENSMUSP00000108240	FBpp0086329			ENSCINP00000011459	ENSBTAT00000054031	4.00E-21	ENST00000437999	8.00E-20			ENSGACT00000001931	2.00E-37	ENSORLT00000025797	1.00E-26
325	rud_dec_c731	0.22144392	4.90E-01	0.2235548	0.16704497	0.65437853	32	0.019478458	0.015569161	0.035972789	9.131483243615430E-01	0.3392805	3.07737E-06	0.6607195	0.76406956	gene325	rud_dec_c731									ENSXETP00000039602								FBpp0099481
326	rud_dec_c11560	0.45552838	6.79E-01	0.28634015	0.99668455	0.18497878	32	0.022761905	0.049873016	0.014888889	6.402861553382870E-04	0.9798126	8.88719E-06	0.0201874	0.112047185	gene326	rud_dec_c11560	AGAP007803-PA [Anopheles gambiae str. PEST]	F:binding		tnr6a_mouse ame: full=trinucleotide repeat-containing gene 6a protein	F:nucleic acid binding, P:maintenance of protein location in cell, F:protein complex scaffold, C:cytoplasmic mRNA processing body, P:cellular response to starvation, C:perinuclear region of cytoplasm	sp|Q3UHK8|TNR6A_MOUSE	ENSDARP00000100679	ENSP00000338965	ENSXETP00000037671	ENSGACP00000018912	ENSORLP00000016025	ENSDARP00000100679	ENSTRUP00000024724	ENSTNIP00000006799	ENSBTAP00000023950	ENSMUSP00000131809	FBpp0099519
327	rud_dec_c27561	0.60114956	7.72E-01	0.5058641	0.5114754	0.5369068	32	0.032503401	0.03229932	0.031351474	2.225106202899950E-04	0.9880986	8.96235E-06	0.0119014	0.21756075	gene327	rud_dec_c27561											ENSORLP00000000123	ENSDARP00000081597		ENSTNIP00000015960	ENSBTAP00000032279
328	rud_dec_rep_c24500	0.019400999	1.56E-01	0.6245071	0.002956166	0.057467543	32	0.037179138	0.001315193	0.007174603	1.117867402193150E+00	0.2903781	2.63381E-06	0.7096219	0.803096735	gene328	rud_dec_rep_c24500	ribosomal protein rpl36a	C:ribosome, F:structural constituent of ribosome, P:translation	oncorhynchus mykiss 60s ribosomal protein l36a mrna	rl44_copci ame: full=60s ribosomal protein l44 ame: full=60s ribosomal protein l41	C:ribosome, F:structural constituent of ribosome, P:translation	sp|Q9UWE4|RL44_COPCI	ENSDARP00000075363	ENSP00000386655	ENSXETP00000039360	ENSGACP00000023095	ENSORLP00000001035	ENSDARP00000075363	ENSTRUP00000030602	ENSTNIP00000018827	ENSBTAP00000020267	ENSMUSP00000059766	FBpp0079168	ENSCSAVP00000012378	C09H10.2.2	ENSCINP00000026138	ENSBTAT00000010166	2.00E-24	ENST00000413334	1.00E-21	ENSXETT00000039360	5.00E-24	ENSGACT00000023139	3.00E-27	ENSORLT00000001036	1.00E-24	ENSDART00000080919	1.00E-28
331	AS_rud_dec2_c69	0.9747004	9.83E-01	0.986637	0.67116743	0.9869329	32	0.049591837	0.038557823	0.049473923	1.220741101747080E-03	0.9721283	8.81749E-06	0.0278717	0.069227073	gene331	AS_rud_dec2_c69	NADH-dehydrogenase. putative [Ixodes scapularis]	P:oxidation reduction, C:mitochondrion, F:oxidoreductase activity, F:NADH dehydrogenase (ubiquinone) activity		ndub3_mouse ame: full=nadh dehydrogenase 1 beta subcomplex subunit 3 ame: full=complex i-b12 short=ci-b12 ame: full=nadh-ubiquinone oxidoreductase b12 subunit	C:membrane, C:mitochondrion	sp|Q9CQZ6|NDUB3_MOUSE	ENSDARP00000100071	ENSP00000407336	ENSXETP00000057357	ENSGACP00000016453	ENSORLP00000014305	ENSDARP00000100071		ENSTNIP00000010728	ENSBTAP00000016957	ENSMUSP00000027193	FBpp0112014	ENSCSAVP00000000783	C18E9.4	ENSCINP00000027411
332	rud_dec_c40697	0.026174482	1.80E-01	0.52387893	0.025750875	0.23099276	32	0.033292517	0.004970522	0.017265306	2.472409813781320E+00	0.1158602	1.05089E-06	0.8841398	0.929594908	gene332	rud_dec_c40697	ankyrin repeat domain 5			ankr5_human ame: full=ankyrin repeat domain-containing protein 5	F:calcium ion binding	sp|Q9NU02|ANKR5_HUMAN	ENSDARP00000004412	ENSP00000392839	ENSXETP00000033025	ENSGACP00000010707	ENSORLP00000020199	ENSDARP00000004412	ENSTRUP00000040109	ENSTNIP00000022373	ENSBTAP00000026288	ENSMUSP00000113881	FBpp0084688	ENSCSAVP00000004615	Y71A12B.4
333	rud_dec2_c612	0.62602866	7.82E-01	0.36432028	0.28214672	0.7830622	32	0.026671202	0.02185941	0.041210884	9.099705667949820E-04	0.9759349	8.85202E-06	0.0240651	0.086945132	gene333	rud_dec2_c612	mitochondrial nadh:ubiquinone oxidoreductase esss			ndubb_ponpy ame: full=nadh dehydrogenase 1 beta subcomplex subunit mitochondrial ame: full=complex i-esss short=ci-esss ame: full=nadh-ubiquinone oxidoreductase esss subunit flags: precursor	C:cell part	sp|Q0MQJ3|NDUBB_PONPY	ENSDARP00000063816	ENSP00000410055			ENSORLP00000024024	ENSDARP00000063816	ENSTRUP00000024160			ENSMUSP00000112320	FBpp0083126	ENSCSAVP00000000903	F42G8.10a	ENSCINP00000002772
335	AS_rud_dec2_c3891	0.43839765	6.67E-01	0.5724979	0.2613192	0.54873717	32	0.035287982	0.020707483	0.031868481	3.994388454663060E-01	0.5273792	4.78348E-06	0.4726208	0.598197161	gene335	AS_rud_dec2_c3891	mysp_mytga ame: full=paramyosin	C:myofibril, C:myosin filament, F:motor activity	haliotis discus discus hald2 mrna for complete cds	mysp_mytga ame: full=paramyosin	C:myofibril, C:myosin filament, F:motor activity	sp|O96064|MYSP_MYTGA	ENSDARP00000108536	ENSP00000347507	ENSXETP00000016276	ENSGACP00000019743	ENSORLP00000007660	ENSDARP00000022798	ENSTRUP00000037733	ENSTNIP00000009781	ENSBTAP00000053217	ENSMUSP00000019625	FBpp0080457	ENSCSAVP00000004661	F58G4.1	ENSCINP00000002389
336	rud_dec_c42746	0.4842524	6.96E-01	0.7302028	0.17463489	0.5119836	32	0.040643991	0.016013605	0.03031746	7.089036005254450E-04	0.9787586	8.87763E-06	0.0212414	0.105233237	gene336	rud_dec_c42746	agap006755-pa isoform 1					sp|Q66II8|RU17_XENTR	ENSDARP00000107350	ENSP00000385077	ENSXETP00000049555	ENSGACP00000000580	ENSORLP00000021468	ENSDARP00000055278	ENSTRUP00000023151	ENSTNIP00000017198	ENSBTAP00000002587	ENSMUSP00000065824	FBpp0078983
337	rud_dec_c37527	0.10260434	3.45E-01	0.13801531	0.5223318	0.14169918	32	0.014811791	0.032712018	0.012507937	1.176639896129920E-04	0.9913453	8.99179E-06	0.0086547	0.295358384	gene337	rud_dec_c37527			human dna sequence from clone rp4-680n4 on chromosome 20 contains the 3 end of the cds2 gene for cdp-diacylglycerol synthase (phosphatidate cytidylyltransferase) a ubiquitin-conjugating enzyme e2d 3 (ubc4 5 yeast) the gpr73l1 gene for g protein-coupled receptor 73-like 1 (prokineticin receptor gpr73b) and a complete sequence			sp|Q91XU8|CDS2_RAT	ENSDARP00000003167	ENSP00000368352	ENSXETP00000013751	ENSGACP00000017538	ENSORLP00000021160	ENSDARP00000003167	ENSTRUP00000038196	ENSTNIP00000014372	ENSBTAP00000007970	ENSMUSP00000086886	FBpp0076411	ENSCSAVP00000013376	C33H5.18b	ENSCINP00000027048	ENSBTAT00000007970	4.00E-14	ENST00000379062	4.00E-16			ENSGACT00000017572	2.00E-10	ENSORLT00000019418	9.00E-14	ENSDART00000028087	1.00E-10
338	rud_dec_c8331	0.6228333	7.81E-01	0.51420575	0.8271035	0.410562	32	0.032852608	0.044013605	0.025818594	1.126229035889990E-03	0.9732285	8.82747E-06	0.0267715	0.073591582	gene338	rud_dec_c8331	oligosaccharyltransferase 48kda subunit		drosophila willistoni gk25161 (dwil\gk25161) mrna	ost48_drome ame: full=dolichyl-diphosphooligosaccharide--protein glycosyltransferase 48 kda subunit short=ddost 48 kda subunit short=oligosaccharyl transferase 48 kda subunit ame: full= 50 short= ame: full=ost5op flags: precursor		sp|Q24319|OST48_DROME	ENSDARP00000054289	ENSP00000399457	ENSXETP00000042918	ENSGACP00000006972	ENSORLP00000024050	ENSDARP00000054289	ENSTRUP00000008652	ENSTNIP00000013831	ENSBTAP00000040330	ENSMUSP00000030538	FBpp0071279	ENSCSAVP00000006130	T09A5.11.1	ENSCINP00000010399					ENSXETT00000042918	1.00E-15					ENSDART00000054290	1.00E-19
339	rud_dec_c3153	0.1585099	4.20E-01	0.8976218	0.3577805	0.036433548	32	0.046630385	0.025433107	0.005405896	7.419202719347590E-04	0.9782697	8.87319E-06	0.0217303	0.101885622	gene339	rud_dec_c3153	hypothetical protein BRAFLDRAFT_86892 [Branchiostoma floridae]	F:metal ion binding, F:zinc ion binding, F:protein binding, C:intracellular										ENSDARP00000101925		ENSTNIP00000005679
340	rud_dec_c33464	0.14538297	4.03E-01	0.5972144	0.17476285	0.22357138	32	0.036190476	0.016027211	0.016852608	4.352522886287030E-01	0.5094229	4.62062E-06	0.4905771	0.614713126	gene340	rud_dec_c33464
341	AS_rud_dec_c21721	0.12050929	3.69E-01	0.3894856	0.043048725	0.69226855	32	0.027777778	0.006752834	0.037414966	2.856016966156850E-01	0.593053	5.37917E-06	0.406947	0.532373223	gene341	AS_rud_dec_c21721	PREDICTED: hypothetical protein [Saccoglossus kowalevskii]		strongylocentrotus purpuratus hypothetical loc589708 mrna	iqub_rat ame: full=iq and ubiquitin-like domain-containing protein ame: full=protein trs4		sp|Q8CDK3|IQUB_MOUSE	ENSDARP00000083250	ENSP00000324882	ENSXETP00000057634	ENSGACP00000011457	ENSORLP00000000651	ENSDARP00000083250	ENSTRUP00000041789	ENSTNIP00000013318	ENSBTAP00000005778	ENSMUSP00000051177	FBpp0083620	ENSCSAVP00000004546			ENSBTAT00000005778	2.00E-11	ENST00000469057	4.00E-10							ENSDART00000088817	2.00E-07
343	AS_rud_dec_c41151	0.29323396	5.59E-01	0.84460515	0.8845034	0.10030012	32	0.044902494	0.046031746	0.010058957	1.272977502651420E-02	0.9101683	8.25549E-06	0.0898317	0.140835561	gene343	AS_rud_dec_c41151							ENSDARP00000097788			ENSGACP00000010483	ENSORLP00000009317	ENSDARP00000097788	ENSTRUP00000033804	ENSTNIP00000011515	ENSBTAP00000049908	ENSMUSP00000101083											ENSGACT00000010505	1.00E-07
344	newAS_rud_dec_c33520	0.124645524	3.76E-01	0.0949494	0.20104101	0.55641776	32	0.011959184	0.017510204	0.032154195	1.492436639978220E-03	0.9691837	8.79078E-06	0.0308163	0.06123816	gene344	newAS_rud_dec_c33520			oryzias latipes 6 gene for guanylyl cyclase complete cds
345	rud_dec_c25775	0.53561157	7.31E-01	0.65160245	0.2283577	0.7796841	32	0.038081633	0.019043084	0.041029478	1.251849056973810E-01	0.7234777	6.56216E-06	0.2765223	0.387651699	gene345	rud_dec_c25775	eukaryotic translation initiation factor 4e-binding protein 1	C:cellular_component, P:negative regulation of translational initiation	Trichoplax adhaerens hypothetical protein. mRNA	4ebp1_mouse ame: full=eukaryotic translation initiation factor 4e-binding protein 1 short=4e-bp1 short=eif4e-binding protein 1 ame: full=phosphorylated heat- and acid-stable protein regulated by insulin 1 short=phas-i		sp|Q60876|4EBP1_MOUSE	ENSDARP00000064031	ENSP00000362314	ENSXETP00000014034	ENSGACP00000024460	ENSORLP00000014110	ENSDARP00000064031	ENSTRUP00000005657	ENSTNIP00000018870	ENSBTAP00000025454	ENSMUSP00000033880	FBpp0077213	ENSCSAVP00000013070		ENSCINP00000020143
346	newAS_rud_dec_rep_c39455	0.40793213	6.49E-01	0.33851686	0.39799258	0.39837018	32	0.02537415	0.02738322	0.025251701	4.107305744582840E-04	0.9838308	8.92364E-06	0.0161692	0.15194637	gene346	newAS_rud_dec_rep_c39455			cyclina sinensis clone cs39 microsatellite sequence
347	rud_dec_c10495	0.38602144	6.32E-01	0.12132143	0.9315479	0.8211846	32	0.013732426	0.047605442	0.042843537	1.632330962877400E-03	0.9677725	8.77798E-06	0.0322275	0.058103326	gene347	rud_dec_c10495	hypothetical protein AaeL_AAEL007367 [Aedes aegypti]	C:mitochondrion		acn9_mouse ame: full=protein acn9 mitochondrial flags: precursor	F:molecular_function, C:mitochondrial intermembrane space, P:biological_process	sp|Q8BQU3|ACN9_MOUSE	ENSDARP00000052395	ENSP00000414066		ENSGACP00000000113		ENSDARP00000052395	ENSTRUP00000014561	ENSTNIP00000021331	ENSBTAP00000021172	ENSMUSP00000040935	FBpp0082759		F25H9.7
350	rud_dec_c29453	0.8777606	9.26E-01	0.67542887	0.7170693	0.63718337	32	0.03892517	0.040117914	0.035342404	1.435733734354010E-03	0.9697745	8.79614E-06	0.0302255	0.062462633	gene350	rud_dec_c29453	molybdenum cofactor-like protein	P:molybdopterin cofactor biosynthetic process, P:Momolybdopterin cofactor biosynthetic process					ENSDARP00000122234			ENSGACP00000011251	ENSORLP00000022659	ENSDARP00000082385	ENSTRUP00000045964	ENSTNIP00000015192
351	rud_dec_c15342	0.5873252	7.63E-01	0.17549026	0.9003079	0.6622754	32	0.016875283	0.046580499	0.036267574	1.551829353843450E-03	0.9685768	8.78528E-06	0.0314232	0.059638074	gene351	rud_dec_c15342	PREDICTED: hypothetical protein [Strongylocentrotus purpuratus]													ENSTNIP00000021103
352	rud_dec_rep_c45167	0.020424565	1.59E-01	0.45214766	0.6261958	0.005906525	32	0.030358277	0.036938776	0.001528345	1.144629947038650E+00	0.2846761	2.5821E-06	0.7153239	0.807229254	gene352	rud_dec_rep_c45167	28s ribosomal protein mitochondrial	F:structural constituent of ribosome, P:translation, C:ribosome, C:intracellular		rt18a_human ame: full=28s ribosomal protein mitochondrial short=mrp-s18-a short=mrps18a short=s18mt-a ame: full=28s ribosomal protein s18- mitochondrial short=mrp-s18-3 flags: precursor	C:mitochondrial small ribosomal subunit	sp|Q9NVS2|RT18A_HUMAN	ENSDARP00000037794	ENSP00000361206	ENSXETP00000007098	ENSGACP00000017668	ENSORLP00000021129	ENSDARP00000037794	ENSTRUP00000038877	ENSTNIP00000019396	ENSBTAP00000051782	ENSMUSP00000122433	FBpp0081380	ENSCSAVP00000016217	ZC262.8.2
353	rud_dec2_c2374	0.62910247	7.83E-01	0.35909984	0.88139415	0.54226846	32	0.026367347	0.045918367	0.031596372	1.141840587933980E-03	0.9730437	8.82579E-06	0.0269563	0.073007198	gene353	rud_dec2_c2374			venerupis decussatus partial srp54 gene for signal recognition particle 54-kda clone exons a-b
354	AS_rud_dec_rep_c41619	0.8331262	9.00E-01	0.9192812	0.66138417	0.37556654	32	0.047306122	0.038181406	0.024190476	1.194913120457380E-03	0.9724246	8.82018E-06	0.0275754	0.070590719	gene354	AS_rud_dec_rep_c41619	conserved hypothetical protein [Ixodes scapularis]		apis mellifera reactive oxygen species modulator 1- transcript variant 3 mrna	romo1_xentr ame: full=reactive oxygen species modulator 1 short=ros modulator 1 ame: full=protein mgr2 homolog	C:cell part, P:cellular process	sp|A4QNF3|ROMO1_XENTR	ENSDARP00000055509	ENSP00000380561	ENSXETP00000054288	ENSGACP00000004717	ENSORLP00000025448	ENSDARP00000055509			ENSBTAP00000039044	ENSMUSP00000113943	FBpp0075396		F15D4.3										ENSORLT00000025449	2.00E-06
356	AS_rud_dec_c8113	0.21714808	4.86E-01	0.43992683	0.05016488	0.17925473	32	0.029795918	0.007446712	0.01462585	5.519177416317680E-04	0.9812571	8.90029E-06	0.0187429	0.12613125	gene356	AS_rud_dec_c8113	phosphorylase kinase gamma	P:auxin biosynthetic process, P:protein amino acid phosphorylation, F:ATP binding, F:protein serine/threonine kinase activity	apis mellifera pak- transcript variant 1 mrna	pak2_rat ame: full=serine threonine-protein kinase pak 2 ame: full=gamma-pak ame: full=p21-activated kinase 2 short=pak-2 contains: ame: full=pak-2p27 contains: ame: full=pak-2p34	F:identical protein binding, F:ATP binding, C:membrane, C:nucleus, C:cytosol, P:protein amino acid autophosphorylation, F:protein serine/threonine kinase activity, C:perinuclear region of cytoplasm	sp|Q64303|PAK2_RAT	ENSDARP00000104638	ENSP00000314067	ENSXETP00000025827	ENSGACP00000014225	ENSORLP00000001935	ENSDARP00000046677	ENSTRUP00000041502	ENSTNIP00000020774	ENSBTAP00000013448	ENSMUSP00000023467	FBpp0081213	ENSCSAVP00000014848	C09B8.7a.1	ENSCINP00000014463	ENSBTAT00000013448	7.00E-21	ENST00000412721	4.00E-26	ENSXETT00000025827	5.00E-29	ENSGACT00000014250	3.00E-12	ENSORLT00000001936	7.00E-20	ENSDART00000123730	5.00E-20
357	AS_rud_dec_c5502	0.9414039	9.62E-01	0.70243144	0.58485276	0.87814575	32	0.039795918	0.035473923	0.045133787	1.168011659046890E-03	0.9727367	8.82301E-06	0.0272633	0.071570221	gene357	AS_rud_dec_c5502	PREDICTED: cerebellin-2-like [Danio rerio]						ENSDARP00000112281	ENSP00000362267	ENSXETP00000012721	ENSGACP00000013516	ENSORLP00000012453	ENSDARP00000040785	ENSTRUP00000028710	ENSTNIP00000020359	ENSBTAP00000014103	ENSMUSP00000127798
359	rud_dec2_c117	0.073879436	2.92E-01	0.18642874	0.068777524	0.54696125	32	0.017473923	0.008893424	0.031814059	1.358341924894430E+00	0.243825	2.21156E-06	0.756175	0.837888724	gene359	rud_dec2_c117	hypothetical protein DAPPUDRAFT_302243 [Daphnia pulex]			tom20_xenla ame: full=mitochondrial import receptor subunit tom20 homolog ame: full=mitochondrial 20 kda outer membrane protein ame: full=outer mitochondrial membrane receptor tom20	C:cell part	sp|Q8AVY0|TOM20_XENLA	ENSDARP00000028306	ENSP00000355566	ENSXETP00000053107	ENSGACP00000026049	ENSORLP00000015599	ENSDARP00000028306	ENSTRUP00000008906	ENSTNIP00000019761	ENSBTAP00000053556	ENSMUSP00000077864	FBpp0074672		F23H12.2.2	ENSCINP00000000602
362	AS_rud_dec_c26753	0.85518134	9.13E-01	0.8557462	0.5603358	0.7081755	32	0.045278912	0.034417234	0.038117914	1.147329042282760E-03	0.972979	8.82521E-06	0.027021	0.072700142	gene362	AS_rud_dec_c26753	hypothetical protein TGME49_099240 [Toxoplasma gondii ME49]			tri44_rat ame: full=tripartite motif-containing protein 44 ame: full=protein dipb	F:binding	sp|Q6QA27|TRI44_RAT	ENSDARP00000083057	ENSP00000416752		ENSGACP00000010463	ENSORLP00000007133	ENSDARP00000083057	ENSTRUP00000030583	ENSTNIP00000000086	ENSBTAP00000000273	ENSMUSP00000099633	FBpp0086054		Y54G2A.11a
363	AS_rud_dec_rep_c46296	0.65458757	7.97E-01	0.8586609	0.5725737	0.2680961	32	0.045356009	0.034943311	0.019256236	4.919331647371330E-01	0.4830662	4.38155E-06	0.5169338	0.640890932	gene363	AS_rud_dec_rep_c46296	briggsae cbr-cpn-1 protein			mp20_drome ame: full=muscle-specific protein 20		sp|P14318|MP20_DROME	ENSDARP00000049899	ENSP00000252456	ENSXETP00000056922	ENSGACP00000020505	ENSORLP00000007022	ENSDARP00000049899	ENSTRUP00000004542	ENSTNIP00000014001	ENSBTAP00000014883	ENSMUSP00000106859	FBpp0086858	ENSCSAVP00000010633	F43G9.9.2	ENSCINP00000025754
365	rud_dec_c19580	0.10939935	3.54E-01	0.07439033	0.44726437	0.032179095	32	0.01061678	0.029514739	0.00492517	7.673379187735910E-04	0.9779007	8.86985E-06	0.0220993	0.09942881	gene365	rud_dec_c19580													ENSTRUP00000033561
366	rud_dec_rep_c45415	0.23385222	5.03E-01	0.1078893	0.758901	0.18990557	32	0.012943311	0.041709751	0.015106576	3.727867838279050E-04	0.9845957	8.93057E-06	0.0154043	0.163901157	gene366	rud_dec_rep_c45415	chitobiase [Xenorhabdus bovienii SS-2004]	P:carbohydrate metabolic process, F:polysaccharide binding, F:betaNacetylhexosaminidase activity, F:cation binding		hex_vibvu ame: full=beta-hexosaminidase ame: full=beta-n-acetylhexosaminidase ame: full=chitobiase ame: full=n-acetyl-beta-glucosaminidase	F:hydrolase activity. hydrolyzing Oglycosyl compounds, F:carbohydrate binding, P:polysaccharide catabolic process	sp|Q04786|HEX_VIBVU									ENSBTAP00000044382			ENSCSAVP00000017366		ENSCINP00000008969
367	rud_dec_rep_c23449	0.79147094	8.76E-01	0.6138523	0.8152651	0.49847084	32	0.036789116	0.043668934	0.029641723	9.745769197593290E-04	0.9750955	8.8444E-06	0.0249045	0.082712354	gene367	rud_dec_rep_c23449			venerupis decussatus partial srp54 gene for signal recognition particle 54-kda clone exons a-b
368	rud_dec2_c265	0.19393304	4.63E-01	0.3166807	0.102186985	0.89767784	32	0.024303855	0.011414966	0.045936508	5.652364256366120E-02	0.8120773	7.36578E-06	0.1879227	0.276934749	gene368	rud_dec2_c265			PREDICTED: Saccoglossus kowalevskii hypothetical protein LOC100376952 (LOC100376952). mRNA																		ENSBTAT00000048868	5.00E-27	ENST00000248566	3.00E-26	ENSXETT00000036137	8.00E-24	ENSGACT00000008987	2.00E-18	ENSORLT00000005694	4.00E-20	ENSDART00000038038	7.00E-22
369	rud_dec_c4356	0.17800672	4.45E-01	0.04987405	0.57093436	0.7791333	32	0.00862585	0.034897959	0.041006803	5.139262486864020E-05	0.9942801	9.01841E-06	0.0057199	0.389200356	gene369	rud_dec_c4356	aldehyde dehydrogenase family member (alh-1)	F:oxidoreductase activity, P:oxidation reduction	saccoglossus kowalevskii mitochondrial aldehyde dehydrogenase 2-like mrna	aldh2_horse ame: full=aldehyde mitochondrial ame: full=aldh class 2 ame: full=aldh-e2 ame: full=aldhi	F:aldehyde dehydrogenase (NAD) activity, C:mitochondrial matrix, P:oxidation reduction	sp|P12762|ALDH2_HORSE	ENSDARP00000023429	ENSP00000403349	ENSXETP00000045235	ENSGACP00000005476	ENSORLP00000005184	ENSDARP00000088019	ENSTRUP00000036052	ENSTNIP00000009232	ENSBTAP00000011521	ENSMUSP00000031411	FBpp0079406	ENSCSAVP00000002853	F54D8.3a.1	ENSCINP00000016067	ENSBTAT00000010661	4.00E-07			ENSXETT00000045235	2.00E-15	ENSGACT00000005492	2.00E-15			ENSDART00000055593	1.00E-08
371	new_rud_dec_c22988	0.52110595	7.21E-01	0.3247079	0.37446678	0.7530837	32	0.02475737	0.026349206	0.039909297	5.077638246007150E-04	0.9820223	8.90723E-06	0.0179777	0.133536514	gene371	new_rud_dec_c22988
372	AS_rud_dec_rep_c43994	0.572071	7.53E-01	0.7629768	0.20509498	0.8085991	32	0.041922902	0.01769161	0.04231746	7.152047932925140E-02	0.7891357	7.15769E-06	0.2108643	0.306845832	gene372	AS_rud_dec_rep_c43994	unknown protein 25 [Haliotis diversicolor]
373	AS_rud_dec2_c698	0.111049496	3.56E-01	0.46203712	0.03382125	0.74375135	32	0.030780045	0.005918367	0.039514739	9.953103537880560E-01	0.3184479	2.88842E-06	0.6815521	0.780464242	gene373	AS_rud_dec2_c698	camp-dependent protein kinase catalytic		anolis carolinensis fibroblast growth factor receptor 2-like mrna	fgfr3_chick ame: full=fibroblast growth factor receptor 3 short=fgfr-3 ame: full=tyrosine kinase receptor cek2 flags: precursor	C:cell part, P:organ development, P:positive regulation of cellular process	sp|P18460|FGFR3_CHICK	ENSDARP00000050956	ENSP00000339824	ENSXETP00000001352	ENSGACP00000009293	ENSORLP00000022509	ENSDARP00000003321	ENSTRUP00000028192	ENSTNIP00000012512	ENSBTAP00000009427	ENSMUSP00000133064	FBpp0084248	ENSCSAVP00000012876	B0302.1a.1	ENSCINP00000007167					ENSXETT00000018407	7.00E-06
374	rud_dec_c12698	0.05138716	2.46E-01	0.075302124	0.13140859	0.30426723	32	0.010671202	0.013437642	0.020852608	1.220669416609660E+00	0.2692293	2.44199E-06	0.7307707	0.819959836	gene374	rud_dec_c12698	hypothetical protein BRAFLDRAFT_123225 [Branchiostoma floridae]
375	rud_dec_c2274	0.10447922	3.47E-01	0.628473	0.20847549	0.1332737	32	0.037319728	0.017904762	0.012036281	3.093699699406320E-01	0.5780671	5.24324E-06	0.4219329	0.547817003	gene375	rud_dec_c2274			venerupis pullastra microsatellite locus 1-35
377	rud_dec_c5863	0.16529113	4.28E-01	0.4852938	0.062483754	0.34556952	32	0.031687075	0.008408163	0.02275737	8.525226277311040E-01	0.3558397	3.22757E-06	0.6441603	0.75035179	gene377	rud_dec_c5863			venerupis decussatus partial srp54 gene for signal recognition particle 54-kda clone exons a-b
378	AS_rud_dec_c27302	0.4090494	6.49E-01	0.56224066	0.4944683	0.09496882	32	0.034861678	0.031605442	0.009736961	1.498691799781680E-03	0.9691193	8.7902E-06	0.0308807	0.061057929	gene378	AS_rud_dec_c27302			venerupis decussatus partial srp54 gene for signal recognition particle 54-kda clone exons a-b
379	newAS_rud_dec_c11397	0.1662285	4.30E-01	0.12763608	0.25708663	0.04570907	32	0.01414966	0.020489796	0.006258503	1.351428528721490E-03	0.9706749	8.80431E-06	0.0293251	0.064988053	gene379	newAS_rud_dec_c11397			ashbya gossypii atcc 10895 agl062cp complete cds																												ENSDART00000076840	0.000006
380	rud_dec_c11097	0.003356272	6.74E-02	0.040317647	0.007308567	0.36767346	32	0.007746032	0.002226757	0.023795918	2.171062633333910E+00	0.140629	1.27555E-06	0.859371	0.911902824	gene380	rud_dec_c11097	hypothetical protein M23134_02792 [Microscilla marina ATCC 23134]
381	rud_dec2_rep_c3432	0.8746165	9.23E-01	0.7722358	0.9558998	0.43295032	32	0.042240363	0.048548753	0.026739229	1.309509897964740E-03	0.9711331	8.80846E-06	0.0288669	0.066071395	gene381	rud_dec2_rep_c3432				ndus5_bovin ame: full=nadh dehydrogenase iron-sulfur protein 5 ame: full=complex i-15 kda short=ci-15 kda ame: full=nadh-ubiquinone oxidoreductase 15 kda subunit	C:cell part	sp|Q02379|NDUS5_BOVIN		ENSP00000362058		ENSGACP00000002598	ENSORLP00000009207		ENSTRUP00000016604	ENSTNIP00000009729	ENSBTAP00000013507		FBpp0077776
383	rud_dec_c25181	0.01793719	1.50E-01	0.005700311	0.03363805	0.3672403	32	0.00278458	0.005895692	0.023759637	8.521223514068190E-01	0.3559526	3.2286E-06	0.6440474	0.75037887	gene383	rud_dec_c25181	phospholipid scramblase 3 (pl scramblase 3) (ca(2+)-dependent phospholipid scramblase 3)			pls3_human ame: full=phospholipid scramblase 3 short=pl scramblase 3 ame: full=ca(2+)-dependent phospholipid scramblase 3	F:calciumdependent protein binding, C:membrane	sp|Q9NRY6|PLS3_HUMAN	ENSDARP00000112020	ENSP00000316021	ENSXETP00000033851	ENSGACP00000004839	ENSORLP00000007695	ENSDARP00000091831	ENSTRUP00000045563	ENSTNIP00000015734	ENSBTAP00000049510	ENSMUSP00000104273	FBpp0076031	ENSCSAVP00000005488	T22H2.5a.1	ENSCINP00000010166
384	AS_rud_dec_rep_c44068	0.004897515	8.18E-02	0.52414614	0.006574048	0.1622194	32	0.033297052	0.002081633	0.013687075	3.810210589787060E+00	0.05094105	4.6205E-07	0.94905895	0.97027238	gene384	AS_rud_dec_rep_c44068	glutathione s-transferase c	F:transferase activity	venerupis philippinarum glutathione s-transferase c complete cds	gsta_plepl ame: full=glutathione s-transferase a short=gst-a ame: full=gst class-theta	C:cytoplasm, F:transferase activity, F:glutathione transferase activity	sp|P30568|GSTA_PLEPL	ENSDARP00000062517	ENSP00000385765	ENSXETP00000048368	ENSGACP00000010000	ENSORLP00000017200	ENSDARP00000062517	ENSTRUP00000037869	ENSTNIP00000012096	ENSBTAP00000041580	ENSMUSP00000125604	FBpp0082078	ENSCSAVP00000011456	Y71F9AL.5	ENSCINP00000004297
385	rud_dec_c3172	2.60E-04	1.74E-02	0.00028597	0.06555505	0.20442	32	0.000675737	0.008648526	0.015823129	1.328644654931050E+00	0.2490465	2.25893E-06	0.7509535	0.834199378	gene385	rud_dec_c3172	predicted protein [Nematostella vectensis]	F:metal ion binding, F:zinc ion binding, F:protein binding, C:intracellular		tri66_human ame: full=tripartite motif-containing protein 66	F:metal ion binding, F:zinc ion binding, F:protein binding, C:nucleus, C:intracellular	sp|O15016|TRI66_HUMAN	ENSDARP00000094478	ENSP00000299550	ENSXETP00000018248	ENSGACP00000026062	ENSORLP00000022211	ENSDARP00000094478	ENSTRUP00000018726	ENSTNIP00000021802	ENSBTAP00000027831	ENSMUSP00000033339
386	rud_dec_c18846	0.06297198	2.70E-01	0.14763011	0.4665098	0.042726986	32	0.015405896	0.030480726	0.006058957	2.341319358503140E-01	0.6284768	5.70047E-06	0.3715232	0.495259431	gene386	rud_dec_c18846			venus verrucosa satellite vve238d sequence
387	AS_rud_dec_c28418	0.53068817	7.28E-01	0.4958133	0.38828853	0.40764615	32	0.032126984	0.026956916	0.02570068	1.217172159878140E-01	0.7271794	6.59573E-06	0.2728206	0.383388765	gene387	AS_rud_dec_c28418								ENSP00000403447			ENSORLP00000015014				ENSBTAP00000007116	ENSMUSP00000015612
388	new_rud_dec_c25024	0.001415483	4.22E-02	0.000135881	0.6788322	0.075530216	32	0.00044898	0.038839002	0.008539683	1.064291065972610E-03	0.9739749	8.83424E-06	0.0260251	0.077241432	gene388	new_rud_dec_c25024
389	AS_rud_dec_c6439	0.009129868	1.07E-01	0.001226361	0.16096097	0.58088505	32	0.001360544	0.015247166	0.033115646	1.223575812446140E-03	0.972096	8.8172E-06	0.027904	0.069011845	gene389	AS_rud_dec_c6439	peptidase C56. PfpI [Desulfovibrio desulfuricans subsp. desulfuricans str. G20]	F:hydrolase activity. acting on glycosyl bonds	saccoglossus kowalevskii bac cugi_sk_ba 001b6 (saccoglossus kowalevskii bac library) complete sequence	y1413_staeq ame: full=uncharacterized protein serp1413	F:hydrolase activity. acting on glycosyl bonds	sp|Q8CRV8|Y1560_STAES
390	AS_rud_dec2_c1257	0.84659547	9.08E-01	0.39009717	0.98490566	0.7873447	32	0.027804989	0.04952381	0.041410431	1.693030826231730E-03	0.9671791	8.7726E-06	0.0328209	0.05736242	gene390	AS_rud_dec2_c1257	fructose- 6-bisphosphate aldolase			alf2_caeel ame: full=fructose-bisphosphate aldolase 2 ame: full=aldolase ce-2 short=ce2	F:identical protein binding, P:oviposition, P:positive regulation of growth rate, P:locomotion, P:embryonic development ending in birth or egg hatching	sp|P46563|ALF2_CAEEL	ENSDARP00000024492	ENSP00000400452	ENSXETP00000041915	ENSGACP00000027273	ENSORLP00000006739	ENSDARP00000024492	ENSTRUP00000023935	ENSTNIP00000018264	ENSBTAP00000017177	ENSMUSP00000077687	FBpp0084372	ENSCSAVP00000018223	F01F1.12a	ENSCINP00000016705
391	AS_rud_dec_c29588	0.00561703	8.77E-02	0.32372433	0.100494206	0.011741821	32	0.024689342	0.011260771	0.002462585	1.535307302928110E+00	0.2153177	1.953E-06	0.7846823	0.860909027	gene391	AS_rud_dec_c29588
392	new_rud_dec_c30357	0.06556182	2.75E-01	0.326229	0.026203062	0.42706636	32	0.024811791	0.005006803	0.026526077	1.936982018274700E+00	0.1639966	1.4875E-06	0.8360034	0.896601039	gene392	new_rud_dec_c30357
395	rud_dec_c14340	0.06957524	2.84E-01	0.024959864	0.30637798	0.68540776	32	0.005909297	0.023047619	0.037165533	6.777860612382930E-01	0.4103501	3.722E-06	0.5896499	0.706183273	gene395	rud_dec_c14340	splicing factor 3b subunit 1		nasonia vitripennis u2 small nuclear mrna	sf3b1_human ame: full=splicing factor 3b subunit 1 ame: full=pre-mrna-splicing factor sf3b 155 kda subunit short=sf3b155 ame: full=spliceosome-associated protein 155 short=sap 155	C:spliceosomal complex, F:chromatin binding, F:protein binding, C:nuclear speck, P:anterior/posterior pattern formation, P:nuclear mRNA splicing. via spliceosome	sp|Q99NB9|SF3B1_MOUSE	ENSDARP00000109529	ENSP00000335321	ENSXETP00000029260	ENSGACP00000011676		ENSDARP00000073029	ENSTRUP00000039721		ENSBTAP00000011734	ENSMUSP00000027127	FBpp0077728	ENSCSAVP00000004321	T08A11.2	ENSCINP00000005223	ENSBTAT00000011734	2.00E-24	ENST00000335508	2.00E-25			ENSGACT00000011700	7.00E-22			ENSDART00000129140	5.00E-15
396	AS_rud_dec_c17983	0.5678803	7.50E-01	0.6624853	0.7109795	0.25525522	32	0.038439909	0.039968254	0.018539683	1.548837461004660E-01	0.6939113	6.29398E-06	0.3060887	0.422968001	gene396	AS_rud_dec_c17983			salmo salar butyrate response factor 2 mrna
397	new_rud_dec_c16964	0.050344992	2.44E-01	0.13095663	0.44219565	0.037090153	32	0.014335601	0.029324263	0.005482993	8.036496098425230E-01	0.3700044	3.35605E-06	0.6299956	0.738142166	gene397	new_rud_dec_c16964			borrelia burgdorferi complete genome
398	rud_dec_c12106	0.09631433	3.35E-01	0.015450729	0.9832418	0.51075846	32	0.004526077	0.049473923	0.030263039	4.661988276666300E-04	0.9827737	8.91405E-06	0.0172263	0.142556685	gene398	rud_dec_c12106	PREDICTED: hypothetical protein [Saccoglossus kowalevskii]		ciona intestinalis protein mrna	ectd_borbr ame: full=ectoine hydroxylase	P:oxidation reduction, F:oxidoreductase activity, F:oxidoreductase activity. acting on CH or CH2 groups	sp|Q7W977|ECTD_BORPA	ENSDARP00000015072		ENSXETP00000009752		ENSORLP00000007780	ENSDARP00000015072	ENSTRUP00000026222			ENSMUSP00000027975	FBpp0112127	ENSCSAVP00000013978
399	rud_dec2_c2889	0.002656013	5.99E-02	0.010332667	0.05790015	0.12634084	32	0.003718821	0.008031746	0.011596372	1.852965711207160E-01	0.6668604	6.04862E-06	0.3331396	0.453974263	gene399	rud_dec2_c2889	red protein	C:nucleus	crassostrea gigas ik cytokine partial cds	red_human ame: full=protein red ame: full=cytokine ik ame: full=ik factor ame: full=protein rer	P:immune response, C:extracellular space, P:cellcell signaling, C:soluble fraction	sp|Q66HG8|RED_RAT	ENSDARP00000009186	ENSP00000261812	ENSXETP00000036010	ENSGACP00000027648	ENSORLP00000016299	ENSDARP00000009186	ENSTRUP00000015321	ENSTNIP00000007026	ENSBTAP00000020011	ENSMUSP00000007042	FBpp0081475	ENSCSAVP00000012560	Y49F6B.4	ENSCINP00000011595					ENSXETT00000036010	6.00E-19			ENSORLT00000016300	8.00E-17	ENSDART00000012396	8.00E-15
401	rud_dec_c39062	0.50624186	7.11E-01	0.9642684	0.17658752	0.3595319	32	0.048848073	0.016131519	0.02338322	2.088095535214050E-03	0.9635528	8.73971E-06	0.0364472	0.059317509	gene401	rud_dec_c39062
404	AS_rud_dec_c8895	0.09960277	3.41E-01	0.050716426	0.7221918	0.04594933	32	0.008684807	0.040340136	0.006281179	1.884312143261010E-04	0.9890478	8.97096E-06	0.0109522	0.237649804	gene404	AS_rud_dec_c8895			spisula solidissima complete sequence
405	AS_rud_dec_c4528	0.31113437	5.70E-01	0.38276348	0.17350382	0.75464123	32	0.027510204	0.015945578	0.039977324	7.031027657308180E-02	0.7908856	7.17357E-06	0.2091144	0.304661384	gene405	AS_rud_dec_c4528	PREDICTED: hypothetical protein [Strongylocentrotus purpuratus]		saccoglossus kowalevskii radial spoke 3 homolog mrna	rsh3a_mouse ame: full=radial spoke head protein 3 homolog a ame: full=radial spoke head-like protein 2a	F:molecular_function, P:biological_process	sp|Q3UFY4|RSH3A_MOUSE	ENSDARP00000094171	ENSP00000252655	ENSXETP00000021540	ENSGACP00000013213	ENSORLP00000022452	ENSDARP00000094171	ENSTRUP00000045997	ENSTNIP00000013672	ENSBTAP00000007814	ENSMUSP00000024572	FBpp0076657			ENSCINP00000010310	ENSBTAT00000007814	4.00E-58	ENST00000252655	5.00E-78	ENSXETT00000021540	3.00E-78	ENSGACT00000013238	2.00E-12	ENSORLT00000022453	2.00E-11	ENSDART00000103394	1.00E-35
406	AS_rud_dec_c10794	0.17783444	4.44E-01	0.4366684	0.12808463	0.4189081	32	0.029678005	0.01322449	0.026195011	5.188538781735580E-01	0.471331	4.27511E-06	0.528669	0.650973904	gene406	AS_rud_dec_c10794	PREDICTED: hypothetical protein [Saccoglossus kowalevskii]			gltd1_mouse ame: full=glycolipid transfer protein domain-containing protein 1	F:molecular_function, F:glycolipid transporter activity, P:biological_process, F:glycolipid binding, C:cellular_component, P:glycolipid transport	sp|Q8BS40|GLTD1_MOUSE	ENSDARP00000068896	ENSP00000343890	ENSXETP00000024361	ENSGACP00000014911	ENSORLP00000019949	ENSDARP00000068896	ENSTRUP00000014411	ENSTNIP00000015386	ENSBTAP00000010025	ENSMUSP00000030950	FBpp0071544	ENSCSAVP00000013443	F49D11.9	ENSCINP00000007561
407	rud_dec_c40525	0.10704975	3.51E-01	0.79858965	0.01999652	0.16015628	32	0.04321542	0.004253968	0.013560091	2.122036884036440E+00	0.1451933	1.31695E-06	0.8548067	0.909423246	gene407	rud_dec_c40525	hypothetical protein DAPPUDRAFT_67133 [Daphnia pulex]										ENSORLP00000010742							ENSCSAVP00000011552		ENSCINP00000028903
408	rud_dec_c25728	0.39778987	6.41E-01	0.79119205	0.68159986	0.18583998	32	0.0429161	0.038943311	0.0149161	2.086571644531430E-01	0.6478219	5.87594E-06	0.3521781	0.474521354	gene408	rud_dec_c25728	PREDICTED: predicted protein-like [Saccoglossus kowalevskii]		strongylocentrotus purpuratus tubulin--tyrosine ligase-like protein 4 partial mrna	ttll4_human ame: full=tubulin polyglutamylase ttll4 ame: full=tubulin--tyrosine ligase-like protein 4	C:cell part	sp|Q14679|TTLL4_HUMAN	ENSDARP00000098039	ENSP00000258398	ENSXETP00000030386	ENSGACP00000011092	ENSORLP00000022806	ENSDARP00000103885	ENSTRUP00000019749	ENSTNIP00000018722	ENSBTAP00000024502	ENSMUSP00000109308	FBpp0289629		ZK1128.6b.3	ENSCINP00000013692
409	AS_rud_dec_c20887	0.006732396	9.48E-02	0.58804727	0.05899035	0.029249737	32	0.035823129	0.008126984	0.004639456	3.396580444955980E+00	0.06533173	5.92578E-07	0.93466827	0.961176261	gene409	AS_rud_dec_c20887	zinc dhhc-type containing 6-like		saccoglossus kowalevskii zinc dhhc-type containing 6-like mrna	zdh16_bovin ame: full=probable palmitoyltransferase zdhhc16 ame: full=zinc finger dhhc domain-containing protein 16 short=dhhc-16	F:metal ion binding, F:transferase activity, C:endoplasmic reticulum, C:membrane part	sp|Q58CU4|ZDH16_BOVIN	ENSDARP00000099898	ENSP00000377357	ENSXETP00000007439	ENSGACP00000009599	ENSORLP00000010785	ENSDARP00000027047	ENSTRUP00000043810	ENSTNIP00000007352	ENSBTAP00000016883	ENSMUSP00000026154	FBpp0084478	ENSCSAVP00000003300	C17D12.1a		ENSBTAT00000008119	4.00E-13	ENST00000411421	2.00E-12	ENSXETT00000007439	6.00E-16	ENSGACT00000006544	7.00E-15	ENSORLT00000025206	2.00E-08	ENSDART00000020233	2.00E-06
412	rud_dec_c9453	0.39331016	6.37E-01	0.44465977	0.3379541	0.29552922	32	0.030022676	0.024498866	0.020426304	2.985409430493740E-04	0.9862146	8.94526E-06	0.0137854	0.187369253	gene412	rud_dec_c9453	zinc finger	F:nucleic acid binding, F:zinc ion binding, C:intracellular	sus scrofa zinc finger protein 235 mrna	zg8_xenla ame: full=gastrula zinc finger protein	F:binding	sp|Q6ZNA1|ZN836_HUMAN	ENSDARP00000101300	ENSP00000408965	ENSXETP00000033111	ENSGACP00000005897	ENSORLP00000024112	ENSDARP00000101511	ENSTRUP00000008102	ENSTNIP00000022172	ENSBTAP00000016857	ENSMUSP00000097048	FBpp0078004	ENSCSAVP00000015123	Y38H8A.5	ENSCINP00000001930							ENSGACT00000013747	4.00E-07
414	rud_dec_c15142	0.17607412	4.42E-01	0.029448975	0.53311384	0.5921591	32	0.006512472	0.03321542	0.033578231	3.148174818647930E-04	0.9858438	8.94189E-06	0.0141562	0.184448927	gene414	rud_dec_c15142	glycosyl hydrolase	P:lysosome organization, P:sphingolipid metabolic process, C:lysosome, F:glucosylceramidase activity, F:hydrolase activity, P:carbohydrate metabolic process, F:cation binding, F:catalytic activity		gun16_triha ame: full=endo- -beta-d-glucanase ame: full=beta- -glucanase ame: full=glucan endo- -beta-glucosidase flags: precursor	F:hydrolase activity. acting on glycosyl bonds, P:primary metabolic process	sp|Q8J0I9|GUN16_TRIHA	ENSDARP00000098103	ENSP00000357358		ENSGACP00000015683	ENSORLP00000012639	ENSDARP00000098103		ENSTNIP00000021480	ENSBTAP00000019765	ENSMUSP00000130660	FBpp0112317	ENSCSAVP00000006475	C33C12.8
415	rud_dec_c24032	0.71772474	8.32E-01	0.76802003	0.50369334	0.53215617	32	0.042068027	0.031959184	0.031179138	8.918084951119450E-04	0.9761762	8.85421E-06	0.0238238	0.088391029	gene415	rud_dec_c24032	tyrosine hydroxylase			ph4h_bovin ame: full=phenylalanine-4-hydroxylase short=pah ame: full=phe-4-monooxygenase	F:binding, P:metabolic process	sp|P04177|TY3H_RAT	ENSDARP00000103556	ENSP00000328814	ENSXETP00000042488	ENSGACP00000026480	ENSORLP00000020640	ENSDARP00000103556	ENSTRUP00000036997	ENSTNIP00000015640	ENSBTAP00000016999	ENSMUSP00000101549	FBpp0076665	ENSCSAVP00000010761	B0432.5b	ENSCINP00000013415
416	rud_dec_c603	0.4626772	6.83E-01	0.90681624	0.11807343	0.6394569	32	0.046879819	0.012512472	0.035469388	1.122154898433790E-01	0.7376358	6.69057E-06	0.2623642	0.370774433	gene416	rud_dec_c603	hypothetical protein DDB_G0293562 [Dictyostelium discoideum AX4]			ypf05_plaf7 ame: full=uncharacterized protein pf11_0207	F:molecular_function, P:symbiosis. encompassing mutualism through parasitism, C:cellular_component	sp|Q8IIG7|YPF05_PLAF7	ENSDARP00000099476	ENSP00000296755		ENSGACP00000020378	ENSORLP00000007162	ENSDARP00000064808	ENSTRUP00000022599			ENSMUSP00000120285	FBpp0086409		F36H12.3
417	rud_dec2_c2805	0.045643523	2.32E-01	0.7620499	0.33810407	0.026785603	32	0.041877551	0.024507937	0.004376417	1.339774392282940E+00	0.2470738	2.24103E-06	0.7529262	0.835885336	gene417	rud_dec2_c2805			nucula al-2008 satellite nuc005 sequence
419	rud_dec_c12987	0.23186605	5.00E-01	0.190364	0.22718918	0.5917101	32	0.017727891	0.018979592	0.033560091	1.445609326841570E-01	0.7037883	6.38357E-06	0.2962117	0.411330508	gene419	rud_dec_c12987				nicn1_canfa ame: full=nicolin-1 ame: full=tubulin polyglutamylase complex subunit 5 short=pgs5	C:intracellular organelle	sp|Q9CQM0|NICN1_MOUSE		ENSP00000273598	ENSXETP00000013068	ENSGACP00000004000	ENSORLP00000013675		ENSTRUP00000002607		ENSBTAP00000000498	ENSMUSP00000035227				ENSCINP00000026793
420	rud_dec_rep_c28339	0.20349096	4.74E-01	0.84058344	0.06670421	0.11804397	32	0.04475737	0.008739229	0.011115646	2.730343859411730E-04	0.9868166	8.95072E-06	0.0131834	0.196379214	gene420	rud_dec_rep_c28339
421	rud_dec_c7341	0.003655495	7.08E-02	0.003933504	0.003541487	0.0327049	32	0.002371882	0.001473923	0.004993197	1.831270052918390E+00	0.1759776	1.59617E-06	0.8240224	0.888245542	gene421	rud_dec_c7341	big defensin 3					sp|P80957|BDEF_TACTR
422	rud_dec_c14010	7.73E-04	3.04E-02	0.02647614	0.6435093	0.000370679	32	0.006099773	0.037555556	0.000272109	3.494881736042080E+00	0.0615588	5.58356E-07	0.9384412	0.963528069	gene422	rud_dec_c14010	unnamed protein product [Tetraodon nigroviridis]		monodelphis domestica s-methyl-5 -thioadenosine phosphorylase-like mrna	mtap_mouse ame: full=s-methyl-5 -thioadenosine phosphorylase ame: full=5 -methylthioadenosine phosphorylase short=mta phosphorylase short=mtapase	F:Smethyl5thioadenosine phosphorylase activity, P:nucleoside metabolic process	sp|Q9CQ65|MTAP_MOUSE	ENSDARP00000054207	ENSP00000410131	ENSXETP00000012027	ENSGACP00000023218		ENSDARP00000054207	ENSTRUP00000009294	ENSTNIP00000021204	ENSBTAP00000045533	ENSMUSP00000061092	FBpp0086072	ENSCSAVP00000008704	B0228.7.1	ENSCINP00000005182	ENSBTAT00000048509	5.00E-38	ENST00000355696	1.00E-34	ENSXETT00000012027	3.00E-34	ENSGACT00000023263	2.00E-31			ENSDART00000054208	6.00E-40
423	rud_dec_rep_c43471	0.08733918	3.18E-01	0.018938899	0.6578048	0.52050227	32	0.00506576	0.038049887	0.030689342	2.539500958391720E-04	0.9872856	8.95497E-06	0.0127144	0.201946443	gene423	rud_dec_rep_c43471			venerupis decussatus partial srp54 gene for signal recognition particle 54-kda clone exons a-b
425	AS_rud_dec_c36432	0.013044958	1.27E-01	0.060586225	0.005181341	0.015402841	32	0.009560091	0.001863946	0.002979592	5.582471636671470E-04	0.9811499	8.89932E-06	0.0188501	0.125096118	gene425	AS_rud_dec_c36432	predicted protein [Nematostella vectensis]			sarm1_caeel ame: full=sterile alpha and tir motif-containing protein tir-1 ame: full=neuronal symmetry protein 2 ame: full=sarm1 homolog	F:identical protein binding, P:nematode larval development, P:defense response, P:positive regulation of growth rate, P:reproduction, P:embryonic development ending in birth or egg hatching, P:receptormediated endocytosis	sp|Q86DA5|SARM1_CAEEL								ENSTNIP00000011606		ENSMUSP00000062231			F13B10.1e.2
426	rud_dec_c33974	0.19858605	4.68E-01	0.42148477	0.581037	0.03487647	32	0.029070295	0.035315193	0.005206349	1.835824246541050E-03	0.9658239	8.76031E-06	0.0341761	0.056872456	gene426	rud_dec_c33974	histocompatibility 28-like						ENSDARP00000009521			ENSGACP00000016609	ENSORLP00000010797	ENSDARP00000009521	ENSTRUP00000005150	ENSTNIP00000013083				ENSCSAVP00000018909		ENSCINP00000019144
429	new_rud_dec_c16688	0.20367813	4.74E-01	0.051928066	0.68510836	0.5861766	32	0.008829932	0.039097506	0.033342404	1.209161447093260E-03	0.9722608	8.81869E-06	0.0277392	0.069986084	gene429	new_rud_dec_c16688			dicentrarchus labrax chromosome sequence corresponding to linkage group complete sequence
430	newAS_rud_dec_c37573	0.372153	6.20E-01	0.57483935	0.58631	0.15761574	32	0.035369615	0.035514739	0.013396825	1.163339653192110E+00	0.280774	2.5467E-06	0.719226	0.810057035	gene430	newAS_rud_dec_c37573			venerupis decussatus partial srp54 gene for signal recognition particle 54-kda clone exons a-b
431	rud_dec_c37716	0.3078929	5.68E-01	0.12782252	0.59393764	0.6698072	32	0.014176871	0.035768707	0.036575964	1.461483997843510E-03	0.9695048	8.79369E-06	0.0304952	0.061871634	gene431	rud_dec_c37716			venerupis decussatus partial srp54 gene for signal recognition particle 54-kda clone exons a-b
432	rud_dec_c2036	0.043290164	2.27E-01	0.014036446	0.105261214	0.87085855	32	0.004362812	0.011614512	0.044743764	5.488373353728090E-04	0.9813094	8.90077E-06	0.0186906	0.126319119	gene432	rud_dec_c2036			digitalis lanata mrna for peptidyl-prolyl cis-trans isomerase			sp|Q94G00|PIN1_MALDO
434	rud_dec_c10948	0.21537256	4.85E-01	0.35732645	0.09779756	0.6659841	32	0.02631746	0.011079365	0.036417234	1.534616319531770E-04	0.9901161	8.98064E-06	0.0098839	0.263802009	gene434	rud_dec_c10948	serine protease	F:peptidase activity		dfp3_antmy ame: full= defense protein 3 short=dfp-3 flags: precursor	F:molecular_function, P:defense response to protozoan, C:extracellular region, P:innate immune response, P:defense response to bacterium	sp|Q0Q028|DFP3_ANTMY	ENSDARP00000122083	ENSP00000393884	ENSXETP00000028877		ENSORLP00000006931	ENSDARP00000088049	ENSTRUP00000015780	ENSTNIP00000021318	ENSBTAP00000004475	ENSMUSP00000039487	FBpp0080212	ENSCSAVP00000017052		ENSCINP00000003502
435	rud_dec2_c2124	0.5362429	7.31E-01	0.39042506	0.65408534	0.16779314	32	0.027814059	0.037918367	0.014031746	1.575816548552210E-03	0.968335	8.78308E-06	0.031665	0.059230154	gene435	rud_dec2_c2124			plasmodium falciparum 3d7 transcription factor with ap2 domain complete cds
436	rud_dec_c29459	0.7020843	8.25E-01	0.91214675	0.44503534	0.28939	32	0.047097506	0.029460317	0.020136054	1.375189852012680E-03	0.9704184	8.80198E-06	0.0295816	0.064125462	gene436	rud_dec_c29459	PREDICTED: CG3301-like [Saccoglossus kowalevskii]			dhr11_chick ame: full=dehydrogenase reductase sdr family member 11 flags: precursor	P:oxidation reduction, F:binding, F:oxidoreductase activity, C:extracellular region	sp|Q71R50|DHR11_CHICK	ENSDARP00000090869	ENSP00000377962	ENSXETP00000054621	ENSGACP00000026754	ENSORLP00000014244	ENSDARP00000090869	ENSTRUP00000015175	ENSTNIP00000019327	ENSBTAP00000013600	ENSMUSP00000043467	FBpp0291423	ENSCSAVP00000017409		ENSCINP00000009603
437	new_rud_dec_c34543	0.6023816	7.73E-01	0.943442	0.8181102	0.19765231	32	0.048217687	0.043768707	0.015464853	8.694223576526380E-04	0.976477	8.85693E-06	0.023523	0.090095215	gene437	new_rud_dec_c34543
438	rud_dec_c16370	0.109104596	3.54E-01	0.022298388	0.7115166	0.9099049	32	0.005564626	0.039977324	0.046430839	4.151113750708640E-02	0.8385545	7.60594E-06	0.1614455	0.241074742	gene438	rud_dec_c16370
439	rud_dec_rep_c21946	0.5653011	7.49E-01	0.38030747	0.54832053	0.57661724	32	0.027387755	0.033968254	0.032929705	2.515676064263060E-04	0.9873454	8.95551E-06	0.0126546	0.2027495	gene439	rud_dec_rep_c21946	dlp12 prophage integrase	F:prophage integrase activity, F:DNA binding, P:DNA integration, P:DNA recombination	escherichia coli dh1 complete genome	intd_ecoli ame: full=prophage dlp12 integrase ame: full=prophage qsr integrase		sp|P24218|INTD_ECOLI
440	rud_dec_rep_c21544	0.20474689	4.75E-01	0.05163297	0.20680453	0.38626984	32	0.008807256	0.017800454	0.024684807	1.291641572152000E-03	0.9713307	8.81026E-06	0.0286693	0.06648889	gene440	rud_dec_rep_c21544	hypothetical protein TcasGA2_TC030690 [Tribolium castaneum]			ndubb_ponpy ame: full=nadh dehydrogenase 1 beta subcomplex subunit mitochondrial ame: full=complex i-esss short=ci-esss ame: full=nadh-ubiquinone oxidoreductase esss subunit flags: precursor	C:cell part	sp|Q0MQJ3|NDUBB_PONPY	ENSDARP00000063816	ENSP00000410055			ENSORLP00000024024	ENSDARP00000063816	ENSTRUP00000024160			ENSMUSP00000074190	FBpp0083126	ENSCSAVP00000000903	F42G8.10a	ENSCINP00000002772
441	rud_dec_c32118	0.013808695	1.30E-01	0.17555763	0.024442473	0.23246036	32	0.016879819	0.004793651	0.017328798	7.009770518882300E-01	0.4024556	3.65039E-06	0.5975444	0.712849775	gene441	rud_dec_c32118	wd repeat-containing protein 65			wdr65_mouse ame: full=wd repeat-containing protein 65		sp|Q9D180|WDR65_MOUSE	ENSDARP00000072017		ENSXETP00000013236		ENSORLP00000006894		ENSTRUP00000033406	ENSTNIP00000019866	ENSBTAP00000035421	ENSMUSP00000080592		ENSCSAVP00000018044		ENSCINP00000004140
443	AS_rud_dec_c17034	0.58030367	7.59E-01	0.2096025	0.98232335	0.43078902	32	0.01878458	0.049428571	0.026648526	1.701279029362010E-03	0.9670993	8.77188E-06	0.0329007	0.057292957	gene443	AS_rud_dec_c17034	hypothetical protein DAPPUDRAFT_200622 [Daphnia pulex]			sesn3_mouse ame: full=sestrin-3	F:molecular_function, P:biological_process, C:cellular_component, C:nucleus	sp|Q9CYP7|SESN3_MOUSE	ENSDARP00000093160	ENSP00000407008	ENSXETP00000046035	ENSGACP00000007604	ENSORLP00000016911	ENSDARP00000093160	ENSTRUP00000002816	ENSTNIP00000015244	ENSBTAP00000005267	ENSMUSP00000034507	FBpp0071996	ENSCSAVP00000018066		ENSCINP00000015713
444	AS_rud_dec2_rep_c2624	0.19067048	4.59E-01	0.26493847	0.05094411	0.1567805	32	0.021664399	0.007510204	0.013342404	7.244784669637730E-04	0.9785266	8.87552E-06	0.0214734	0.103589185	gene444	AS_rud_dec2_rep_c2624	hypothetical protein BRAFLDRAFT_269053 [Branchiostoma floridae]		taeniopygia guttata sec61 beta subunit mrna	sc61b_canfa ame: full=protein transport protein sec61 subunit beta	P:transmembrane transport, P:ERassociated protein catabolic process, F:PPbondhydrolysisdriven protein transmembrane transporter activity, C:integral to membrane, P:protein import into nucleus. translocation, C:endoplasmic reticulum Sec complex, P:retrograde protein transport. ER to cytosol, F:epidermal growth factor binding	sp|Q5RB31|SC61B_PONAB	ENSDARP00000059012	ENSP00000223641	ENSXETP00000057092	ENSGACP00000011910	ENSORLP00000010951	ENSDARP00000059012	ENSTRUP00000028690	ENSTNIP00000021549	ENSBTAP00000003190	ENSMUSP00000126887	FBpp0086627	ENSCSAVP00000004330	Y38F2AR.9.2		ENSBTAT00000003190	3.00E-20	ENST00000223641	6.00E-18	ENSXETT00000057092	4.00E-24	ENSGACT00000011934	2.00E-15	ENSORLT00000010952	1.00E-23	ENSDART00000146936	1.00E-26
446	newAS_rud_dec_rep_c29932	0.74876094	8.51E-01	0.43481272	0.3648861	0.5935155	32	0.029587302	0.025800454	0.033619048	1.094469770407610E-03	0.9736086	8.83092E-06	0.0263914	0.075424527	gene446	newAS_rud_dec_rep_c29932			venerupis decussatus partial srp54 gene for signal recognition particle 54-kda clone exons a-b
447	rud_dec_c8516	0.7600998	8.57E-01	0.47282282	0.8420753	0.34322718	32	0.031188209	0.04446712	0.022662132	4.135954769255930E-01	0.5201502	4.71792E-06	0.4798498	0.605331237	gene447	rud_dec_c8516	disulfide-isomerase a3 precursor-like protein	P:positive regulation of apoptosis, F:protein binding, P:cell redox homeostasis, F:isomerase activity, C:endoplasmic reticulum	rattus norvegicus tl0aea13yd22 mrna sequence	erp60_schma ame: full=probable protein disulfide-isomerase er-60 ame: full=erp60 flags: precursor	C:endoplasmic reticulum lumen, P:cell redox homeostasis, F:protein disulfide isomerase activity	sp|P38658|ERP60_SCHMA	ENSDARP00000026546	ENSP00000300289	ENSXETP00000010101	ENSGACP00000009330	ENSORLP00000001825	ENSDARP00000026546	ENSTRUP00000039832	ENSTNIP00000013295	ENSBTAP00000022854	ENSMUSP00000028683	FBpp0087164	ENSCSAVP00000015886	H06O01.1.2		ENSBTAT00000022854	3.00E-13	ENST00000434494	1.00E-13	ENSXETT00000010101	2.00E-15			ENSORLT00000001826	1.00E-10	ENSDART00000049020	2.00E-12
448	rud_dec_rep_c18563	0.12002395	3.68E-01	0.2466111	0.0746079	0.036390662	32	0.020689342	0.009360544	0.005387755	8.422930392839580E-04	0.9768468	8.86029E-06	0.0231532	0.092638012	gene448	rud_dec_rep_c18563
449	rud_dec_rep_c46248	0.24571112	5.14E-01	0.412721	0.97964776	0.06327187	32	0.028761905	0.049297052	0.007650794	7.836940082484030E-04	0.9776665	8.86772E-06	0.0223335	0.09784665	gene449	rud_dec_rep_c46248	ubiquinol-cytochrome c reductase complex 11 kda		pediculus humanus corporis ubiquinol-cytochrome c reductase complex 11 kda mrna	qcr6_human ame: full=cytochrome b-c1 complex subunit mitochondrial ame: full=complex iii subunit 6 ame: full=complex iii subunit viii ame: full=cytochrome c1 non-heme 11 kda protein ame: full=mitochondrial hinge protein ame: full=ubiquinol-cytochrome c reductase complex 11 kda protein flags: precursor	C:mitochondrial respiratory chain, P:oxidation reduction, P:aerobic respiration, P:oxidative phosphorylation	sp|P07919|QCR6_HUMAN	ENSDARP00000076588	ENSP00000309565	ENSXETP00000009508	ENSGACP00000015679	ENSORLP00000010741	ENSDARP00000076588	ENSTRUP00000045332	ENSTNIP00000009406	ENSBTAP00000012635	ENSMUSP00000077744	FBpp0290998		T27E9.2.1
450	rud_dec_c1949	0.17651114	4.43E-01	0.05629276	0.50324386	0.94677925	32	0.00923356	0.031936508	0.047963719	5.677678999518320E-04	0.9809899	8.89787E-06	0.0190101	0.123700314	gene450	rud_dec_c1949	unnamed protein product [Mus musculus]	F:molecular_function, P:response to unfolded protein, C:integral to membrane, C:endoplasmic reticulum, P:biological_process, C:cellular_component, C:nucleus	sus scrofa clone: expressed in ovary	ubxn4_bovin ame: full=ubx domain-containing protein 4 ame: full=ubx domain-containing protein 2	C:cell part	sp|Q3ZBU9|UBXN4_BOVIN		ENSP00000272638	ENSXETP00000053672	ENSGACP00000001992			ENSTRUP00000038224	ENSTNIP00000009489	ENSBTAP00000043008	ENSMUSP00000027592		ENSCSAVP00000011761					ENST00000470687	3.00E-06
451	rud_dec_c5560	0.37152076	6.20E-01	0.13264555	0.7745379	0.3762269	32	0.014439909	0.042294785	0.024231293	1.390145793152440E-03	0.970258	8.80053E-06	0.029742	0.06357302	gene451	rud_dec_c5560	proteasome 26s non-atpase subunit 13-like		saccoglossus kowalevskii proteasome 26s non-atpase subunit 13-like mrna	psd13_chick ame: full=26s proteasome non-atpase regulatory subunit 13 ame: full=26s proteasome regulatory subunit rpn9 ame: full=26s proteasome regulatory subunit s11 ame: full=26s proteasome regulatory subunit	C:proteasome complex	sp|P84169|PSD13_CHICK	ENSDARP00000095348	ENSP00000436186	ENSXETP00000019396	ENSGACP00000020753	ENSORLP00000000101	ENSDARP00000009605	ENSTRUP00000031115	ENSTNIP00000007690	ENSBTAP00000002650	ENSMUSP00000026560	FBpp0083861	ENSCSAVP00000003935	T06D8.8.2	ENSCINP00000013974	ENSBTAT00000002650	2.00E-12	ENST00000382671	2.00E-15	ENSXETT00000019396	5.00E-13	ENSGACT00000020796	4.00E-08
453	AS_rud_dec_rep_c27062	0.44860834	6.73E-01	0.28339127	0.3379274	0.96234626	32	0.022662132	0.024494331	0.048535147	1.397624632713410E+00	0.2371217	2.15076E-06	0.7628783	0.843789635	gene453	AS_rud_dec_rep_c27062			ruditapes philippinarum srp54 intron isolate ai16
455	rud_dec_c12488	0.95120776	9.68E-01	0.5931974	0.9147028	0.71696186	32	0.036049887	0.047043084	0.038494331	2.854293133412960E-02	0.8658387	7.85341E-06	0.1341613	0.204403595	gene455	rud_dec_c12488	inhibitor of growth protein 2	F:zinc ion binding, F:protein binding	taeniopygia guttata inhibitor of growth member 1 mrna	ing1_mouse ame: full=inhibitor of growth protein 1	P:positive regulation of transcription, F:protein binding, P:cell cycle, F:transcription activator activity, F:zinc ion binding	sp|Q9QXV3|ING1_MOUSE	ENSDARP00000102740	ENSP00000364932	ENSXETP00000041302	ENSGACP00000001097	ENSORLP00000015380	ENSDARP00000102740	ENSTRUP00000035350	ENSTNIP00000000290	ENSBTAP00000035217	ENSMUSP00000112193	FBpp0080103	ENSCSAVP00000000652	Y51H1A.4		ENSBTAT00000021725	2.00E-13	ENST00000434682	2.00E-21	ENSXETT00000006501	5.00E-25	ENSGACT00000001097	1.00E-14	ENSORLT00000022618	3.00E-21	ENSDART00000145266	7.00E-27
456	rud_dec_c27504	0.051932275	2.47E-01	0.10214728	0.26119217	0.19399521	32	0.012507937	0.020693878	0.015297052	5.937987666428050E-03	0.9385771	8.51317E-06	0.0614229	0.097869995	gene456	rud_dec_c27504	src kinase associated phosphoprotein 2	F:kinase activity
457	rud_dec_c25641	0.70227265	8.25E-01	0.29759926	0.8955327	0.43921718	32	0.023396825	0.046426304	0.026997732	1.620188910749220E-03	0.9678926	8.77907E-06	0.0321074	0.058354472	gene457	rud_dec_c25641	hypothetical protein [Homo sapiens]			gd1l1_human ame: full=ganglioside-induced differentiation-associated protein 1-like 1 short=gdap1-l1		sp|Q96MZ0|GD1L1_HUMAN	ENSDARP00000047081	ENSP00000362037	ENSXETP00000057082	ENSGACP00000015225	ENSORLP00000020553	ENSDARP00000047081	ENSTRUP00000024606	ENSTNIP00000015405	ENSBTAP00000003358	ENSMUSP00000105047
458	rud_dec_c18537	0.011478094	1.19E-01	0.100825615	0.016139802	0.18300265	32	0.012394558	0.00369161	0.014798186	3.895732841685790E+00	0.04840892	4.39083E-07	0.95159108	0.97168953	gene458	rud_dec_c18537	fucosyltransferase. putative [Ixodes scapularis]	F:transferase activity, C:Golgi cisterna membrane, C:integral to membrane, C:membrane, F:transferase activity. transferring glycosyl groups, C:Golgi apparatus, F:fucosyltransferase activity, P:protein amino acid glycosylation, F:glycoprotein 3alphaLfucosyltransferase activity		fucta_drome ame: full=glycoprotein 3-alpha-l-fucosyltransferase a ame: full=core alpha-( )-fucosyltransferase		sp|Q9VUL9|FUCTA_DROME	ENSDARP00000062554	ENSP00000302599	ENSXETP00000033136	ENSGACP00000026200	ENSORLP00000016790	ENSDARP00000062554	ENSTRUP00000005881	ENSTNIP00000022578	ENSBTAP00000010501	ENSMUSP00000127065	FBpp0075394	ENSCSAVP00000015696		ENSCINP00000001701
459	newAS_rud_dec_c38541	0.3146707	5.74E-01	0.33824414	0.28699863	0.32868826	32	0.025356009	0.022108844	0.021986395	3.770107085974240E-01	0.5392074	4.89077E-06	0.4607926	0.586593929	gene459	newAS_rud_dec_c38541			venerupis decussatus epic-pcr fragment clone c11
462	rud_dec2_c431	0.06800042	2.81E-01	0.8094401	0.054244168	0.035364732	32	0.043641723	0.007777778	0.005265306	7.245967094604560E-04	0.9785249	8.87551E-06	0.0214751	0.103506789	gene462	rud_dec2_c431	secreted protein			sprc_caeel ame: full=sparc ame: full=basement-membrane protein 40 short=bm-40 ame: full=osteonectin short=on ame: full=secreted protein acidic and rich in cysteine flags: precursor	P:nematode larval development, P:gamete generation, P:positive regulation of multicellular organism growth, P:meiosis, P:positive regulation of growth rate, P:embryonic development ending in birth or egg hatching	sp|P34714|SPRC_CAEEL	ENSDARP00000078028	ENSP00000414856	ENSXETP00000023428	ENSGACP00000022248	ENSORLP00000014240	ENSDARP00000039659	ENSTRUP00000036729	ENSTNIP00000015932	ENSBTAP00000005348	ENSMUSP00000031249	FBpp0084464	ENSCSAVP00000015617	C44B12.2	ENSCINP00000012043
463	rud_dec_c7862	0.81852716	8.93E-01	0.6237154	0.38933668	0.8922479	32	0.037156463	0.027015873	0.045687075	1.376600742673870E-03	0.9704032	8.80184E-06	0.0295968	0.064107983	gene463	rud_dec_c7862
466	new_rud_dec_c40020	0.14370234	4.01E-01	0.02213997	0.69616956	0.545539	32	0.00552381	0.039437642	0.031773243	1.180348030516140E-04	0.9913316	8.99167E-06	0.0086684	0.293103599	gene466	new_rud_dec_c40020			ruditapes philippinarum srp54 intron isolate ai16
467	AS_rud_dec2_c2032	0.20187557	4.72E-01	0.54528624	0.03621144	0.3004138	32	0.034204082	0.006108844	0.020666667	4.128864189738120E-03	0.9487662	8.60559E-06	0.0512338	0.08214548	gene467	AS_rud_dec2_c2032	memory related protein-2	F:protein binding, F:NAD binding, F:leucine binding, F:glutamate dehydrogenase [NAD(P)+] activity, C:mitochondrial matrix, F:ADP binding, F:GTP binding, C:mitochondrial inner membrane, P:glutamate biosynthetic process, P:negative regulation of insulin secretion, P:longterm memory, F:glutamate dehydrogenase activity, P:glutamate deamidation, P:oxidation reduction, F:ATP binding, P:positive regulat…	danio rerio glutamate mitochondrial-like mrna	dhe3_human ame: full=glutamate dehydrogenase mitochondrial short=gdh 1 flags: precursor	F:NAD binding, F:glutamate dehydrogenase activity, F:ADP binding, P:glutamate deamidation, F:glutamate dehydrogenase [NAD(P)+] activity, P:oxidation reduction, F:leucine binding, P:glutamate biosynthetic process, F:identical protein binding, F:ATP binding, C:mitochondrial matrix, F:GTP binding, P:positive regulation of insulin secretion	sp|P00367|DHE3_HUMAN	ENSDARP00000008646	ENSP00000377937	ENSXETP00000017882	ENSGACP00000003729	ENSORLP00000013071	ENSDARP00000091816	ENSTRUP00000009100	ENSTNIP00000008014	ENSBTAP00000009923	ENSMUSP00000022322	FBpp0088990	ENSCSAVP00000014453	ZK829.4.3	ENSCINP00000014974	ENSBTAT00000016393	1.00E-54	ENST00000394415	6.00E-66	ENSXETT00000017882	1.00E-79	ENSGACT00000003741	1.00E-59	ENSORLT00000013072	1.00E-65	ENSDART00000145078	1.00E-81
468	AS_rud_dec_c27720	0.19848387	4.68E-01	0.13296388	0.83209634	0.31444174	32	0.01447619	0.044181406	0.021360544	1.894572691563950E+00	0.1686871	1.53004E-06	0.8313129	0.892699668	gene468	AS_rud_dec_c27720	mitochondrial inner membrane protease atp23 homolog			atp23_human ame: full=mitochondrial inner membrane protease atp23 homolog ame: full=ku70-binding protein 3 ame: full=xrcc6-binding protein 1	P:doublestrand break repair via nonhomologous end joining, F:DNAdependent protein kinase activity	sp|Q9Y6H3|ATP23_HUMAN	ENSDARP00000087721	ENSP00000300145	ENSXETP00000032154	ENSGACP00000025273	ENSORLP00000011401	ENSDARP00000087721	ENSTRUP00000020682	ENSTNIP00000009706	ENSBTAP00000042356	ENSMUSP00000128382	FBpp0080537
469	AS_rud_dec_c179	0.8290908	8.99E-01	0.94964284	0.74937564	0.4794998	32	0.048435374	0.04137415	0.02876644	3.154649331122520E-03	0.9552094	8.66403E-06	0.0447906	0.07204535	gene469	AS_rud_dec_c179	PREDICTED: hypothetical protein [Strongylocentrotus purpuratus]		monodelphis domestica suppressor of g2 allele of skp1 homolog mrna	sugt1_bovin ame: full=suppressor of g2 allele of skp1 homolog	F:binding	sp|Q2KIK0|SUGT1_BOVIN	ENSDARP00000102557	ENSP00000308067	ENSXETP00000040966	ENSGACP00000017034	ENSORLP00000013910	ENSDARP00000005163	ENSTRUP00000023170	ENSTNIP00000010719	ENSBTAP00000002770	ENSMUSP00000052942	FBpp0081351	ENSCSAVP00000010367	D1054.3.2	ENSCINP00000002703	ENSBTAT00000002771	8.00E-27	ENST00000310528	2.00E-18							ENSDART00000135432	3.00E-10
470	rud_dec_c41114	0.6549673	7.97E-01	0.93815273	0.2897936	0.35226247	32	0.047995465	0.022253968	0.023079365	1.322144083189860E-03	0.9709943	8.8072E-06	0.0290057	0.065801571	gene470	rud_dec_c41114	hypothetical protein BRAFLDRAFT_88413 [Branchiostoma floridae]	P:oxidation reduction, F:binding, F:oxidoreductase activity, P:metabolic process, P:pentosephosphate shunt, F:catalytic activity, F:phosphogluconate dehydrogenase (decarboxylating) activity, F:coenzyme binding		aff3_human ame: full=af4 fmr2 family member 3 ame: full=lymphoid nuclear protein related to af4 short=protein laf-4	P:multicellular organismal development, P:regulation of transcription, C:nucleus, F:DNA binding	sp|P51826|AFF3_HUMAN	ENSDARP00000068559	ENSP00000317421	ENSXETP00000042503	ENSGACP00000024782	ENSORLP00000001684	ENSDARP00000068559	ENSTRUP00000020165	ENSTNIP00000021367	ENSBTAP00000024607	ENSMUSP00000130578	FBpp0288477
471	rud_dec_c17828	0.04089852	2.21E-01	0.027710054	0.1883321	0.6820007	32	0.006249433	0.016811791	0.037052154	5.396620098291000E-01	0.4625728	4.19567E-06	0.5374272	0.658961071	gene471	rud_dec_c17828
472	new_rud_dec_c4456	0.20399936	4.74E-01	0.5877642	0.057815626	0.67437613	32	0.035814059	0.008027211	0.036761905	3.142437852429790E-01	0.5750876	5.21621E-06	0.4249124	0.55071245	gene472	new_rud_dec_c4456
474	rud_dec_c4265	0.06189774	2.67E-01	0.9822245	0.011544358	0.9223217	32	0.049442177	0.002993197	0.046907029	2.396072937732690E+00	0.1216403	1.10331E-06	0.8783597	0.92537121	gene474	rud_dec_c4265	a+u-rich rna-binding protein	P:mRNA stabilization, F:nucleic acid binding, F:protein binding, C:intracellular organelle, C:cytosol	saccoglossus kowalevskii heterogeneous nuclear ribonucleoprotein d-like mrna	hnrdl_chick ame: full=heterogeneous nuclear ribonucleoprotein d-like short=hnrnp d-like short=hnrnp dl	F:RNA binding, C:cytoplasm, F:nucleotide binding, P:regulation of transcription, C:nucleus, F:DNA binding	sp|Q5ZI72|HNRDL_CHICK	ENSDARP00000111731	ENSP00000307544	ENSXETP00000027493	ENSGACP00000020676	ENSORLP00000002285	ENSDARP00000092188	ENSTRUP00000047234	ENSTNIP00000010410	ENSBTAP00000019699	ENSMUSP00000072533	FBpp0082320	ENSCSAVP00000016637	R10E9.1.1		ENSBTAT00000019699	9.00E-12	ENST00000515432	2.00E-08	ENSXETT00000008339	2.00E-06
475	AS_rud_dec_c33478	0.25770316	5.25E-01	0.050054405	0.747655	0.7382585	32	0.008648526	0.041306122	0.039269841	4.617076685349270E-04	0.9828569	8.9148E-06	0.0171431	0.143593003	gene475	AS_rud_dec_c33478			venerupis decussatus partial srp54 gene for signal recognition particle 54-kda clone exons a-b
476	rud_dec_c27738	0.008321695	1.03E-01	0.838914	0.000851028	0.34012812	32	0.044684807	0.00062585	0.022489796	3.454067022562070E+00	0.06309633	5.72302E-07	0.93690367	0.962307972	gene476	rud_dec_c27738			dicentrarchus labrax guanine nucleotide binding protein beta polypeptide 1-like partial cds			sp|P54313|GBB2_RAT	ENSDARP00000111963	ENSP00000416870	ENSXETP00000042401	ENSGACP00000007206	ENSORLP00000004503	ENSDARP00000079424	ENSTRUP00000030674	ENSTNIP00000013841	ENSBTAP00000008508	ENSMUSP00000030940	FBpp0073921	ENSCSAVP00000015142	F13D12.7a.3	ENSCINP00000007802	ENSBTAT00000000259	2.00E-27	ENST00000378606	2.00E-30	ENSXETT00000061345	2.00E-28	ENSGACT00000007224	2.00E-111	ENSORLT00000004504	2.00E-20	ENSDART00000015309	2.00E-43
477	AS_rud_dec_c10477	0.65136236	7.96E-01	0.2643107	0.7415476	0.9400975	32	0.021623583	0.041106576	0.047623583	4.271934981829870E-04	0.98351	8.92073E-06	0.01649	0.148504306	gene477	AS_rud_dec_c10477	PREDICTED: similar to ENSANGP00000019124 [Nasonia vitripennis]		nematostella vectensis protein partial mrna	capzb_rat ame: full=f-actin-capping protein subunit beta ame: full= beta	C:cortical cytoskeleton, P:lamellipodium assembly, C:WASH complex, F:actin binding, C:Factin capping protein complex, C:lamellipodium, P:actin filament capping, C:membrane	sp|Q5XI32|CAPZB_RAT	ENSDARP00000067634	ENSP00000364287	ENSXETP00000038232	ENSGACP00000001394	ENSORLP00000000185	ENSDARP00000067634	ENSTRUP00000024810	ENSTNIP00000017681	ENSBTAP00000005983	ENSMUSP00000038011	FBpp0077549	ENSCSAVP00000015430	M106.5.2		ENSBTAT00000005983	1.00E-76	ENST00000264202	6.00E-94	ENSXETT00000038232	1.00E-42	ENSGACT00000001395	4.00E-75	ENSORLT00000000187	2.00E-70	ENSDART00000067635	9.00E-74
478	AS_rud_dec_c23422	0.5044988	7.10E-01	0.25281677	0.84998596	0.55824924	32	0.021024943	0.04475737	0.032240363	7.956086684544060E-04	0.9774974	8.86619E-06	0.0225026	0.096516015	gene478	AS_rud_dec_c23422	hypotheticial protein		schistosoma mansoni genome sequence supercontig smp_scaff000038
479	rud_dec_c8430	0.07477898	2.95E-01	0.010012486	0.75143886	0.40027094	32	0.003655329	0.041464853	0.025328798	3.343083516824660E-04	0.9854122	8.93798E-06	0.0145878	0.176704747	gene479	rud_dec_c8430	PREDICTED: titin-like [Saccoglossus kowalevskii]			titin_human ame: full=titin ame: full=connectin ame: full=rhabdomyosarcoma antigen mu-rms-	P:cardiac muscle fiber development, F:alphaactinin binding, P:regulation of protein kinase activity, P:cardiac myofibril assembly, P:skeletal muscle thick filament assembly, F:protein selfassociation, F:telethonin binding, P:mitotic chromosome condensation, P:response to calcium ion, P:sarcomere organization, F:calcium ion binding, P:muscle contraction, C:striated muscle thin filament, C:extracel…	sp|Q8WZ42|TITIN_HUMAN	ENSDARP00000019957	ENSP00000340554	ENSXETP00000032875	ENSGACP00000000362	ENSORLP00000022735	ENSDARP00000019957	ENSTRUP00000001459	ENSTNIP00000022587	ENSBTAP00000053669	ENSMUSP00000070975	FBpp0290555	ENSCSAVP00000004028	ZK617.1d	ENSCINP00000013688
480	AS_rud_dec_c9697	0.2255925	4.94E-01	0.06707019	0.19436668	0.26059812	32	0.010090703	0.017160998	0.018829932	7.556827027883620E-04	0.9780692	8.87138E-06	0.0219308	0.100225211	gene480	AS_rud_dec_c9697																															ENSDART00000136654	3.00E-19
482	AS_rud_dec_rep_c45043	0.4566644	6.79E-01	0.29635686	0.28862187	0.17904067	32	0.023333333	0.022185941	0.014612245	1.756119624531030E-03	0.9665736	8.76711E-06	0.0334264	0.056975291	gene482	AS_rud_dec_rep_c45043	predicted protein [Nematostella vectensis]		meleagris gallopavo small nuclear ribonucleoprotein f-like partial mrna	ruxf_xenla ame: full=small nuclear ribonucleoprotein f short=snrnp-f ame: full=sm protein f short=sm-f short=	C:U7 snRNP, C:nucleoplasm, P:spliceosomal snRNP assembly, C:spliceosomal complex, F:RNA binding, F:protein binding, C:cytosol	sp|P62321|RUXF_XENLA	ENSDARP00000053128	ENSP00000266735	ENSXETP00000046743	ENSGACP00000026497	ENSORLP00000020796	ENSDARP00000053772	ENSTRUP00000038228	ENSTNIP00000015646	ENSBTAP00000021643	ENSMUSP00000020203	FBpp0087118	ENSCSAVP00000012767	ZK652.1.1		ENSBTAT00000021643	2.00E-38	ENST00000266735	1.00E-36					ENSORLT00000020797	1.00E-32	ENSDART00000053129	7.00E-34
483	rud_dec_c15004	0.027062343	1.82E-01	0.01003071	0.3073984	0.5843908	32	0.003659864	0.023124717	0.033274376	1.313762547283650E-04	0.9908549	8.98735E-06	0.0091451	0.278470821	gene483	rud_dec_c15004	unnamed protein product [Macaca fascicularis]		ciona intestinalis procollagen- 2-oxoglutarate 4-dioxygenase (proline 4-hydroxylase) alpha 1 polypeptide mrna	p4ha1_rat ame: full=prolyl 4-hydroxylase subunit alpha-1 short=4-ph alpha-1 ame: full=procollagen- -oxoglutarate-4-dioxygenase subunit alpha-1 flags: precursor		sp|P54001|P4HA1_RAT	ENSDARP00000048492	ENSP00000263556	ENSXETP00000015233	ENSGACP00000013525	ENSORLP00000018691	ENSDARP00000095644	ENSTRUP00000009678	ENSTNIP00000020147	ENSBTAP00000044089	ENSMUSP00000101106	FBpp0085012	ENSCSAVP00000018638	Y47D3B.10	ENSCINP00000014408	ENSBTAT00000056188	2.00E-10	ENST00000263556	4.00E-08			ENSGACT00000013550	6.00E-09			ENSDART00000104874	5.00E-07
484	new_rud_dec_rep_c27239	0.43783894	6.67E-01	0.98490417	0.16316071	0.2633752	32	0.049546485	0.015410431	0.018979592	1.104737682112490E-03	0.9734851	8.8298E-06	0.0265149	0.074788573	gene484	new_rud_dec_rep_c27239
485	AS_rud_dec_c21364	0.35151795	6.03E-01	0.6869786	0.122188866	0.40207267	32	0.039256236	0.01277551	0.025460317	6.827862665659260E-05	0.9934071	9.0105E-06	0.0065929	0.359769984	gene485	AS_rud_dec_c21364
486	rud_dec2_c680	0.009006563	1.07E-01	0.012999103	0.005404787	0.03318327	32	0.004226757	0.001891156	0.005034014	9.032778538085040E-04	0.9760235	8.85282E-06	0.0239765	0.087485256	gene486	rud_dec2_c680	translation factor sui1		ixodes scapularis translation factor mrna	sui1_drome ame: full=protein translation factor sui1 homolog	P:translational initiation, F:translation initiation factor activity	sp|Q9VZS3|SUI1_DROME	ENSDARP00000048967	ENSP00000419449	ENSXETP00000000752	ENSGACP00000019653	ENSORLP00000001506	ENSDARP00000048967	ENSTRUP00000005895	ENSTNIP00000014245	ENSBTAP00000002948	ENSMUSP00000041538	FBpp0072908	ENSCSAVP00000014406	T27F7.3.2	ENSCINP00000017246	ENSBTAT00000025437	1.00E-26	ENST00000487151	7.00E-25	ENSXETT00000053756	1.00E-25	ENSGACT00000019691	4.00E-19	ENSORLT00000001507	2.00E-21
487	rud_dec_c15343	0.18577571	4.55E-01	0.82582873	0.20795362	0.21466468	32	0.044185941	0.017873016	0.016371882	1.226745997432030E+00	0.2680408	2.43121E-06	0.7319592	0.820792092	gene487	rud_dec_c15343			venerupis decussatus epic-pcr fragment clone c11
488	AS_rud_dec_c35690	0.9808208	9.87E-01	0.7267546	0.7932815	0.784717	32	0.040498866	0.042952381	0.041292517	1.562416373815260E-03	0.9684699	8.78431E-06	0.0315301	0.059482508	gene488	AS_rud_dec_c35690	galactose mutarotase	F:carbohydrate binding, P:carbohydrate metabolic process, F:catalytic activity, P:hexose metabolic process, F:isomerase activity		galm_human ame: full=aldose 1-epimerase ame: full=galactose mutarotase	C:cytoplasm, F:aldose 1epimerase activity, F:carbohydrate binding, P:carbohydrate metabolic process, P:hexose metabolic process, F:isomerase activity	sp|Q96C23|GALM_HUMAN	ENSDARP00000074789	ENSP00000399473	ENSXETP00000019772	ENSGACP00000003268	ENSORLP00000023979	ENSDARP00000101115			ENSBTAP00000028111	ENSMUSP00000120018	FBpp0078079	ENSCSAVP00000014870
490	rud_dec_c18745	0.5041788	7.10E-01	0.21911654	0.65191036	0.7094663	32	0.019283447	0.037873016	0.038195011	1.677075703298660E-03	0.9673341	8.77401E-06	0.0326659	0.057593765	gene490	rud_dec_c18745	c1q domain containing protein 1q54			c1ql4_mouse ame: full=complement c1q-like protein 4 ame: full=c1q and tumor necrosis factor-related protein 11 short=c1qtnf11 flags: precursor	F:molecular_function, P:biological_process, C:cellular_component	sp|Q4ZJM9|C1QL4_MOUSE	ENSDARP00000067062	ENSP00000335285	ENSXETP00000024449	ENSGACP00000011804	ENSORLP00000009336	ENSDARP00000067062	ENSTRUP00000034386	ENSTNIP00000018134	ENSBTAP00000043534	ENSMUSP00000068402
491	rud_dec_c21724	0.00620143	9.09E-02	0.011590531	0.20470192	0.16662401	32	0.003972789	0.017678005	0.013977324	2.072461607588130E-02	0.8855317	8.03203E-06	0.1144683	0.176547372	gene491	rud_dec_c21724	unknown [Lymnaea stagnalis]			hssr_staes ame: full=heme response regulator hssr	P:regulation of transcription. DNAdependent, P:twocomponent signal transduction system (phosphorelay), C:cytoplasm, F:twocomponent response regulator activity, P:transcription, P:regulation of transcription, P:pathogenesis, F:DNA binding	sp|Q8CN92|HSSR_STAES
492	AS_rud_dec_c2826	0.24526756	5.14E-01	0.288466	0.056988455	0.34925574	32	0.022911565	0.007941043	0.022938776	3.421456002570260E-04	0.9852422	8.93644E-06	0.0147578	0.173243056	gene492	AS_rud_dec_c2826	riken cdna 1810030o07-like						ENSDARP00000111320	ENSP00000330488			ENSORLP00000013968		ENSTRUP00000024117			ENSMUSP00000059095
493	rud_dec_c17707	0.27903473	5.44E-01	0.30785915	0.34020445	0.26569274	32	0.023904762	0.024634921	0.019111111	3.427233945103580E-04	0.9852298	8.93632E-06	0.0147702	0.172653144	gene493	rud_dec_c17707										ENSGACP00000024474				ENSTNIP00000018867				ENSCSAVP00000018829		ENSCINP00000002256
495	AS_rud_dec_c34865	0.23902592	5.07E-01	0.21577774	0.45732096	0.20877928	32	0.019115646	0.030027211	0.016099773	5.404552692880310E-04	0.9814527	8.90207E-06	0.0185473	0.128099554	gene495	AS_rud_dec_c34865	calpain [Anopheles gambiae]	P:proteolysis, F:calciumdependent cysteinetype endopeptidase activity, C:intracellular	saccoglossus kowalevskii calpain-b-like miscrna	cana_drome ame: full=calpain-a ame: full=calcium-activated neutral proteinase a short=canp a contains: ame: full=calpain-a catalytic subunit		sp|Q9VT65|CANB_DROME	ENSDARP00000016353	ENSP00000355626	ENSXETP00000050369	ENSGACP00000026126	ENSORLP00000024513	ENSDARP00000016353	ENSTRUP00000006132	ENSTNIP00000009062	ENSBTAP00000042182	ENSMUSP00000090717	FBpp0076072	ENSCSAVP00000009310	C06G4.2b.2						ENSXETT00000050369	3.00E-08			ENSORLT00000024514	5.00E-10
496	rud_dec_c13339	0.5980371	7.70E-01	0.4253412	0.22230592	0.72784126	32	0.02924263	0.018662132	0.038897959	1.106103145332320E-03	0.9734687	8.82965E-06	0.0265313	0.074624782	gene496	rud_dec_c13339	Tropomyosin [Lepeophtheirus salmonis]						ENSDARP00000056764		ENSXETP00000001437		ENSORLP00000016568	ENSDARP00000056764	ENSTRUP00000043085		ENSBTAP00000005124				W06H8.8e.1	ENSCINP00000026210
497	rud_dec2_rep_c2666	1.86E-04	1.45E-02	2.27391E-05	0.3424766	0.007489795	32	0.000235828	0.024743764	0.0018322	8.975296492508270E-04	0.9760999	8.85351E-06	0.0239001	0.087846216	gene497	rud_dec2_rep_c2666	cytochrome c oxidase subunit iv	F:cytochromec oxidase activity	tribolium castaneum cytochrome c oxidase subunit iv mrna	cox41_gorgo ame: full=cytochrome c oxidase subunit 4 isoform mitochondrial ame: full=cytochrome c oxidase polypeptide iv ame: full=cytochrome c oxidase subunit iv isoform 1 short=cox iv-1	C:mitochondrion, F:cytochromec oxidase activity, C:membrane, C:mitochondrial inner membrane	sp|O46578|COX41_GORGO	ENSDARP00000007446	ENSP00000253452	ENSXETP00000009703	ENSGACP00000021065	ENSORLP00000011893	ENSDARP00000007446	ENSTRUP00000046689	ENSTNIP00000004066	ENSBTAP00000021525	ENSMUSP00000034276	FBpp0080836		W09C5.8.2
499	rud_dec_c18286	0.28566343	5.52E-01	0.6370388	0.12998372	0.24774428	32	0.037614512	0.013365079	0.018136054	2.375901804043670E-04	0.9877019	8.95875E-06	0.0122981	0.20920055	gene499	rud_dec_c18286
500	new_rud_dec_c18953	0.7668068	8.62E-01	0.7812229	0.36086592	0.6950296	32	0.042535147	0.025600907	0.037555556	9.269279235297740E-04	0.9757118	8.84999E-06	0.0242882	0.085481746	gene500	new_rud_dec_c18953			anoplopoma fimbria clone afim-evh-013-129 signal recognition particle 9 kda protein complete cds
501	rud_dec_c23190	0.94903255	9.66E-01	0.63473535	0.7859745	0.6407571	32	0.03752381	0.042675737	0.035510204	9.353061509500540E-04	0.9756023	8.849E-06	0.0243977	0.084971832	gene501	rud_dec_c23190	dna ligase	F:ligase activity, C:intracellular		sp110_yeas1 ame: full=spindle pole body component 110 ame: full=extragenic suppressor of cmd1-1 mutant protein 1 ame: full=nuclear filament-related protein 1 ame: full=spindle pole body spacer protein spc110		sp|P11048|LMNA_XENLA	ENSDARP00000109183	ENSP00000414457	ENSXETP00000052129	ENSGACP00000004848	ENSORLP00000019711	ENSDARP00000065501	ENSTRUP00000033997	ENSTNIP00000002917	ENSBTAP00000020593	ENSMUSP00000061493	FBpp0112314	ENSCSAVP00000011512	F11C3.3.1	ENSCINP00000005991
502	AS_rud_dec2_rep_c2864	0.004387737	7.76E-02	0.19978648	0.002832108	0.431302	32	0.018235828	0.001274376	0.026675737	2.933038463565250E+00	0.08678402	7.87157E-07	0.91321598	0.948763407	gene502	AS_rud_dec2_rep_c2864	glutathione s-transferase c	F:transferase activity	venerupis philippinarum glutathione s-transferase c complete cds	gsta_plepl ame: full=glutathione s-transferase a short=gst-a ame: full=gst class-theta	C:cytoplasm, F:transferase activity, F:glutathione transferase activity	sp|P30568|GSTA_PLEPL	ENSDARP00000062517	ENSP00000385765	ENSXETP00000048368	ENSGACP00000010000	ENSORLP00000017200	ENSDARP00000062517	ENSTRUP00000037869	ENSTNIP00000012096	ENSBTAP00000041580	ENSMUSP00000125604	FBpp0072341	ENSCSAVP00000011456	Y71F9AL.5	ENSCINP00000004297
503	rud_dec_c1762	0.45900133	6.81E-01	0.81246823	0.120885156	0.8242837	32	0.043750567	0.012684807	0.042984127	6.561236654647470E-04	0.9795645	8.88494E-06	0.0204355	0.110205732	gene503	rud_dec_c1762	mgc84466 protein	F:structural constituent of ribosome, P:translation, C:ribosome, C:intracellular	schistosoma mansoni mitochondrial ribosomal protein partial cds	rm02_bovin ame: full=39s ribosomal protein mitochondrial short=l2mt short=mrp-l2 flags: precursor	C:cytoplasm	sp|Q2TA12|RM02_BOVIN	ENSDARP00000085077	ENSP00000373404		ENSGACP00000005403	ENSORLP00000016135	ENSDARP00000085077	ENSTRUP00000002152	ENSTNIP00000016419	ENSBTAP00000016951	ENSMUSP00000109057	FBpp0075941	ENSCSAVP00000009726	F56B3.8	ENSCINP00000010033
504	rud_dec_c25776	0.002929748	6.25E-02	0.029219786	0.002041495	0.003112653	32	0.00647619	0.00106576	0.000979592	7.504759962307610E-02	0.7841245	7.11224E-06	0.2158755	0.313228332	gene504	rud_dec_c25776	predicted protein [Nematostella vectensis]	F:calcium ion binding, F:calciumdependent phospholipid binding							ENSXETP00000026301		ENSORLP00000012431			ENSTNIP00000001451	ENSBTAP00000053744	ENSMUSP00000130957		ENSCSAVP00000012021
505	AS_rud_dec2_c1015	0.48022982	6.93E-01	0.15733854	0.81871295	0.9654256	32	0.015913832	0.043777778	0.048630385	1.431902922377040E-03	0.9698149	8.79651E-06	0.0301851	0.062555059	gene505	AS_rud_dec2_c1015	vitelline membrane outer layer protein 1 homolog precursor	P:vitelline membrane formation, F:structural constituent of vitelline membrane		vmo1_human ame: full=vitelline membrane outer layer protein 1 homolog flags: precursor	P:vitelline membrane formation, F:structural constituent of vitelline membrane, C:extracellular region	sp|Q7Z5L0|VMO1_HUMAN	ENSDARP00000066620	ENSP00000328397	ENSXETP00000045494	ENSGACP00000017236	ENSORLP00000020454	ENSDARP00000066620	ENSTRUP00000008571	ENSTNIP00000014617		ENSMUSP00000021179			Y38H6C.19
506	AS_rud_dec_c31902	0.010329638	1.12E-01	0.002071513	0.73679996	0.88508564	32	0.001764172	0.040947846	0.045451247	3.944786312786160E-04	0.9841539	8.92657E-06	0.0158461	0.157503661	gene506	AS_rud_dec_c31902	CG42255 [Drosophila melanogaster]			gp126_human ame: full=g-protein coupled receptor 126 ame: full=developmentally regulated g-protein-coupled receptor ame: full=vascular inducible g protein-coupled receptor flags: precursor	P:Gprotein coupled receptor protein signaling pathway	sp|Q86SQ4|GP126_HUMAN	ENSDARP00000073925	ENSP00000230173	ENSXETP00000037103	ENSGACP00000025525	ENSORLP00000012895	ENSDARP00000073925	ENSTRUP00000036705	ENSTNIP00000010002	ENSBTAP00000037559	ENSMUSP00000043055	FBpp0288820	ENSCSAVP00000017153	F38E9.2	ENSCINP00000007795
511	rud_dec_c10836	0.14081444	3.96E-01	0.45229706	0.11392682	0.33845553	32	0.030367347	0.012222222	0.022421769	8.465341201018640E-01	0.3575347	3.24295E-06	0.6424653	0.749565517	gene511	rud_dec_c10836	u3 small nucleolar homolog			utp15_chick ame: full=u3 small nucleolar rna-associated protein 15 homolog	C:intracellular part	sp|Q5F3D7|UTP15_CHICK	ENSDARP00000124648	ENSP00000424609	ENSXETP00000036673	ENSGACP00000005765	ENSORLP00000002610	ENSDARP00000011720	ENSTRUP00000033616	ENSTNIP00000018453	ENSBTAP00000036690	ENSMUSP00000048204			Y23H5B.5
513	rud_dec_s38989	0.33336496	5.89E-01	0.10058121	0.34480527	0.8587513	32	0.012385488	0.024848073	0.044217687	1.734158481212940E-03	0.9667831	8.76901E-06	0.0332169	0.057157335	gene513	rud_dec_s38989	hypothetical protein TRIADDRAFT_22290 [Trichoplax adhaerens]	P:electron transport chain, F:oxidoreductase activity. acting on NADH or NADPH, C:mitochondrial inner membrane		ndus4_ponab ame: full=nadh dehydrogenase iron-sulfur protein mitochondrial ame: full=complex i-18 kda short=ci-18 kda ame: full=nadh-ubiquinone oxidoreductase 18 kda subunit flags: precursor	P:positive regulation of fibroblast proliferation, P:oxygen and reactive oxygen species metabolic process, F:NADH dehydrogenase (ubiquinone) activity, C:mitochondrial respiratory chain complex I, P:brain development, P:cellular respiration, P:cAMPmediated signaling, P:mitochondrial respiratory chain complex I assembly, P:response to cAMP	sp|P0CB96|NDUS4_PONPY	ENSDARP00000051054	ENSP00000296684	ENSXETP00000050528	ENSGACP00000006096		ENSDARP00000051054	ENSTRUP00000042611	ENSTNIP00000019027	ENSBTAP00000044670	ENSMUSP00000022286	FBpp0074481		ZK973.10.2
514	rud_dec_c21441	0.10014254	3.41E-01	0.32933682	0.06477328	0.47427672	32	0.024947846	0.008594104	0.028548753	3.074048693959520E-01	0.579277	5.25421E-06	0.420723	0.546890286	gene514	rud_dec_c21441	unnamed protein product [Tetraodon nigroviridis]			tlr13_mouse ame: full=toll-like receptor 13 flags: precursor	P:inflammatory response, F:transmembrane receptor activity, C:integral to membrane, F:molecular_function, C:intrinsic to membrane, P:signal transduction, C:cellular_component, F:receptor activity, F:protein binding, P:innate immune response, P:biological_process	sp|Q6R5N8|TLR13_MOUSE	ENSDARP00000083002	ENSP00000378550	ENSXETP00000036753	ENSGACP00000022548	ENSORLP00000017101	ENSDARP00000083002	ENSTRUP00000028589	ENSTNIP00000007824	ENSBTAP00000007913	ENSMUSP00000043101	FBpp0085182	ENSCSAVP00000010026
515	rud_dec2_c338	0.001036407	3.64E-02	0.000283479	0.01105029	0.30174103	32	0.000671202	0.002920635	0.020712018	1.544870008371730E+00	0.2138944	1.94009E-06	0.7861056	0.861784389	gene515	rud_dec2_c338	rs19_myaar ame: full=40s ribosomal protein s19	C:ribosome, F:structural constituent of ribosome, P:translation	mau63092mya arenaria ribosomal protein s19 complete cds	rs19_myaar ame: full=40s ribosomal protein s19	C:ribosome, F:structural constituent of ribosome, P:translation	sp|Q94613|RS19_MYAAR	ENSDARP00000120183	ENSP00000221975	ENSXETP00000033057	ENSGACP00000004563	ENSORLP00000017642	ENSDARP00000048598	ENSTRUP00000029689	ENSTNIP00000008508	ENSBTAP00000015875	ENSMUSP00000116311	FBpp0074086		T05F1.3.1	ENSCINP00000028979			ENST00000398663	7.00E-08	ENSXETT00000033057	7.00E-18	ENSGACT00000004580	7.00E-18	ENSORLT00000017645	5.00E-06	ENSDART00000136205	1.00E-12
516	rud_dec_c32066	0.31480157	5.74E-01	0.38746807	0.2751661	0.28292558	32	0.027678005	0.021451247	0.019877551	2.055741369101720E+00	0.1516334	1.37536E-06	0.8483666	0.904842287	gene516	rud_dec_c32066	hypothetical protein MELLADRAFT_48766 [Melampsora larici-populina 98AG31]		syntrophothermus lipocalidus dsm complete genome	pdx1_cernc ame: full=pyridoxine biosynthesis protein pdx1 ame: full=singlet oxygen resistance protein 1	P:metabolic process, F:catalytic activity, P:pyridoxine biosynthetic process	sp|O59905|PDX1_CERNC												ENSCSAVP00000018443		ENSCINP00000013057
517	rud_dec_c655	0.5205964	7.21E-01	0.25710696	0.7899274	0.22023141	32	0.021256236	0.042816327	0.016662132	6.134010861866270E-01	0.4335101	3.93206E-06	0.5664899	0.684920277	gene517	rud_dec_c655	twitchin [Mytilus galloprovincialis]	F:ATP binding, F:protein kinase activity, F:nucleotide binding, P:protein amino acid phosphorylation, P:auxin biosynthetic process, F:protein serine/threonine kinase activity		titin_human ame: full=titin ame: full=connectin ame: full=rhabdomyosarcoma antigen mu-rms-	F:transferase activity, P:myofibril assembly, F:cytoskeletal protein binding, P:cardiac muscle tissue development, C:intracellular organelle, P:biological regulation, C:sarcomere	sp|Q8WZ42|TITIN_HUMAN	ENSDARP00000001468	ENSP00000348444	ENSXETP00000030420	ENSGACP00000000362	ENSORLP00000022735	ENSDARP00000001468	ENSTRUP00000001463	ENSTNIP00000001906	ENSBTAP00000011830	ENSMUSP00000107477	FBpp0290554	ENSCSAVP00000004784	C09D1.1g
518	AS_rud_dec_c7460	2.29E-04	1.63E-02	0.19210002	1.55815E-05	0.033677984	32	0.017814059	6.80272E-05	0.005079365	4.651002170533380E+00	0.03103542	2.815E-07	0.96896458	0.983145855	gene518	AS_rud_dec_c7460	achain solution structure of the kh-qua2 region of the xenopus star-gsg quaking	C:cytoplasm, P:cell differentiation, P:RNA splicing, F:RNA binding, P:multicellular organismal development, P:mRNA transport, P:mRNA processing, P:regulation of translation, C:nucleus	equus caballus quaking kh domain rna binding mrna	qkib_danre ame: full=protein quaking-b ame: full=quaking-related protein		sp|Q32NN2|QKIA_XENLA	ENSDARP00000110005	ENSP00000375973	ENSXETP00000034249	ENSGACP00000012756	ENSORLP00000015716	ENSDARP00000020217	ENSTRUP00000030595	ENSTNIP00000020397	ENSBTAP00000048511	ENSMUSP00000046740	FBpp0099954	ENSCSAVP00000018226	T21G5.5d	ENSCINP00000027850	ENSBTAT00000054202	4.00E-17	ENST00000392127	1.00E-26			ENSGACT00000004218	1.00E-10
519	rud_dec_s45798	0.23108618	5.00E-01	0.38360673	0.67787397	0.1664235	32	0.027537415	0.038798186	0.013959184	3.189781248423740E-01	0.5722224	5.19023E-06	0.4277776	0.553384871	gene519	rud_dec_s45798	serine threonine-protein phosphatase 2a 56 kda regulatory subunit alpha isoform-like isoform 2		Loa loa hypothetical protein (LOAG_03069) mRNA. complete cds	2a5a_mouse ame: full=serine threonine-protein phosphatase 2a 56 kda regulatory subunit alpha isoform ame: full=pp2a b subunit isoform b -alpha ame: full=pp2a b subunit isoform b56-alpha ame: full=pp2a b subunit isoform pr61-alpha short=pr61alpha ame: full=pp2a b subunit isoform r5-alpha	F:protein phosphatase type 2A regulator activity, C:protein phosphatase type 2A complex, P:signal transduction, C:nucleus, C:chromosome. centromeric region	sp|Q6PD03|2A5A_MOUSE	ENSDARP00000071683	ENSP00000261461	ENSXETP00000007740	ENSGACP00000026173	ENSORLP00000006988	ENSDARP00000071683	ENSTRUP00000013749	ENSTNIP00000016835	ENSBTAP00000038304	ENSMUSP00000070726	FBpp0084577	ENSCSAVP00000012789	W08G11.4	ENSCINP00000011513	ENSBTAT00000009284	5.00E-07	ENST00000527441	3.00E-06	ENSXETT00000003474	8.00E-10	ENSGACT00000026224	1.00E-07	ENSORLT00000006989	2.00E-11	ENSDART00000025644	6.00E-09
521	AS_rud_dec_c23922	0.1911486	4.60E-01	0.60906637	0.068309315	0.7888294	32	0.036585034	0.008879819	0.041460317	1.302855343034700E+00	0.2536923	2.30106E-06	0.7463077	0.830880697	gene521	AS_rud_dec_c23922			venerupis decussatus epic-pcr fragment clone 6d
523	rud_dec_c23761	0.903821	9.40E-01	0.62788707	0.8116721	0.7216577	32	0.037283447	0.04353288	0.038666667	1.411955418291190E-03	0.9700257	8.79842E-06	0.0299743	0.063054715	gene523	rud_dec_c23761	nif3l1bp1-prov protein			thoc7_xentr ame: full=tho complex subunit 7 homolog	F:RNA binding, C:cytoplasm, P:mRNA transport, P:RNA splicing, P:mRNA processing, P:transport, C:nucleus	sp|Q6P643|THOC7_XENTR	ENSDARP00000022217	ENSP00000377956		ENSGACP00000012184	ENSORLP00000010288	ENSDARP00000022217	ENSTRUP00000024120	ENSTNIP00000009459	ENSBTAP00000043944	ENSMUSP00000065819		ENSCSAVP00000018140
524	rud_dec_c1557	0.63154256	7.85E-01	0.6254581	0.4792115	0.37418923	32	0.037229025	0.030993197	0.024117914	1.662464741343680E-03	0.9674766	8.7753E-06	0.0325234	0.057748943	gene524	rud_dec_c1557	AGAP007952-PA [Anopheles gambiae str. PEST]	P:regulation of protein metabolic process, F:small conjugating protein ligase activity, P:posttranslational protein modification	aedes aegypti ubiquitin-conjugating enzyme e2 partial mrna	ubcd2_drome ame: full=ubiquitin-conjugating enzyme e2-24 kda ame: full=ubiquitin carrier protein ame: full=ubiquitin-protein ligase	F:ubiquitinprotein ligase activity, P:regulation of protein metabolic process, P:posttranslational protein modification	sp|P52485|UBCD2_DROME	ENSDARP00000105375	ENSP00000303709	ENSXETP00000015658	ENSGACP00000017153	ENSORLP00000020581	ENSDARP00000010840	ENSTRUP00000022675	ENSTNIP00000012687	ENSBTAP00000053293	ENSMUSP00000022296	FBpp0079704	ENSCSAVP00000010594	M7.1.2	ENSCINP00000014090	ENSBTAT00000061641	2.00E-65	ENST00000449994	1.00E-70	ENSXETT00000015658	7.00E-71	ENSGACT00000017187	6.00E-59	ENSORLT00000020582	2.00E-58	ENSDART00000049375	2.00E-69
525	rud_dec_c11754	0.53366464	7.29E-01	0.5995207	0.17172153	0.918242	32	0.036272109	0.015804989	0.046743764	5.569066564703460E-04	0.9811726	8.89952E-06	0.0188274	0.125322724	gene525	rud_dec_c11754	hypothetical protein BRAFLDRAFT_219640 [Branchiostoma floridae]								ENSXETP00000037338	ENSGACP00000026768		ENSDARP00000030819			ENSBTAP00000010176
527	rud_dec_c17765	0.23072898	4.99E-01	0.14357758	0.299535	0.59095055	32	0.015151927	0.022657596	0.03352381	1.739147103449680E+00	0.1872469	1.69838E-06	0.8127531	0.880748862	gene527	rud_dec_c17765			venerupis decussatus partial srp54 gene for signal recognition particle 54-kda clone exons a-b
528	rud_dec_c13572	0.17923333	4.46E-01	0.23677477	0.09767868	0.063596115	32	0.020122449	0.01106576	0.00769161	1.458084745650010E-03	0.9695403	8.79402E-06	0.0304597	0.061947836	gene528	rud_dec_c13572	hypothetical protein DAPPUDRAFT_308414 [Daphnia pulex]		equus caballus eukaryotic translation initiation factor 2 subunit 2- transcript variant 1 mrna	if2b_bovin ame: full=eukaryotic translation initiation factor 2 subunit 2 ame: full=eukaryotic translation initiation factor 2 subunit beta short=eif-2-beta	F:metal ion binding, F:protein binding, P:translational initiation, F:translation initiation factor activity	sp|Q5E9D0|IF2B_BOVIN	ENSDARP00000069494	ENSP00000364119	ENSXETP00000042239	ENSGACP00000008099	ENSORLP00000004417	ENSDARP00000069494	ENSTRUP00000006244	ENSTNIP00000014974	ENSBTAP00000007832	ENSMUSP00000128257	FBpp0075700	ENSCSAVP00000019940	K04G2.1.2		ENSBTAT00000007832	5.00E-71	ENST00000374980	3.00E-70	ENSXETT00000042239	2.00E-57	ENSGACT00000008118	8.00E-24	ENSORLT00000004420	1.00E-39	ENSDART00000075009	1.00E-55
530	rud_dec2_c604	0.11881868	3.67E-01	0.07491703	0.4945884	0.16467077	32	0.010634921	0.031619048	0.01385034	1.254316237691450E-02	0.9108264	8.26146E-06	0.0891736	0.139903301	gene530	rud_dec2_c604	glutamine synthetase	F:glutamateammonia ligase activity, F:ATP binding, P:glutamine biosynthetic process	portunus trituberculatus glutamine synthetase partial cds	glna2_drome ame: full=glutamine synthetase 2 cytoplasmic ame: full=glutamate--ammonia ligase 2		sp|P20478|GLNA2_DROME	ENSDARP00000024433	ENSP00000307900	ENSXETP00000000816	ENSGACP00000017768	ENSORLP00000020875	ENSDARP00000024433	ENSTRUP00000002875	ENSTNIP00000018292	ENSBTAP00000041778	ENSMUSP00000083375	FBpp0073345	ENSCSAVP00000000401	Y105C5B.28b	ENSCINP00000012035	ENSBTAT00000044271	1.00E-60	ENST00000435013	2.00E-66	ENSXETT00000000816	5.00E-58	ENSGACT00000023976	4.00E-65	ENSORLT00000020876	2.00E-67	ENSDART00000100170	1.00E-63
531	rud_dec_c6857	0.012933928	1.27E-01	0.00496412	0.46410215	0.11770665	32	0.00262585	0.030353741	0.011102041	4.519105651752390E-04	0.9830397	8.91646E-06	0.0169603	0.145262927	gene531	rud_dec_c6857	calmodulin [Branchiostoma lanceolatum]	F:calcium ion binding	saccoglossus kowalevskii calmodulin mrna	calm_strpu ame: full=calmodulin short=	F:calcium ion binding	sp|Q8STF0|CALM_STRIE	ENSDARP00000065391	ENSP00000387065	ENSXETP00000000663	ENSGACP00000016676	ENSORLP00000022187	ENSDARP00000050307	ENSTRUP00000029442	ENSTNIP00000020232	ENSBTAP00000019411	ENSMUSP00000001204	FBpp0087110	ENSCSAVP00000019974	T21H3.3.2	ENSCINP00000017574	ENSBTAT00000002055	1.00E-21	ENST00000409563	5.00E-22	ENSXETT00000000664	3.00E-22					ENSDART00000034580	1.00E-18
536	rud_dec_rep_c27390	6.55E-04	2.83E-02	0.001600161	0.03426494	0.24124925	32	0.001560091	0.005941043	0.017795918	3.439187694341510E+00	0.06366699	5.77478E-07	0.93633301	0.961990751	gene536	rud_dec_rep_c27390			homo sapiens bac clone rp11-648p3 from complete sequence
537	AS_rud_dec2_c1288	0.35119432	6.03E-01	0.122789145	0.49768743	0.83175755	32	0.013845805	0.031727891	0.043247166	5.543564291201610E-04	0.9812157	8.89992E-06	0.0187843	0.125948503	gene537	AS_rud_dec2_c1288	hypothetical protein BRAFLDRAFT_265353 [Branchiostoma floridae]	F:protein binding	danio rerio membrane palmitoylated 6a (maguk p55 subfamily member 6) transcript variant 1 mrna	mpp6_human ame: full=maguk p55 subfamily member 6 ame: full=veli-associated maguk 1 short=vam-1	F:protein binding	sp|Q9NZW5|MPP6_HUMAN	ENSDARP00000107029	ENSP00000428182	ENSXETP00000007334	ENSGACP00000011141	ENSORLP00000009875	ENSDARP00000073930	ENSTRUP00000038042	ENSTNIP00000021591	ENSBTAP00000020351	ENSMUSP00000039314	FBpp0088884	ENSCSAVP00000017936	F17E5.1b	ENSCINP00000004802					ENSXETT00000007334	8.00E-08			ENSORLT00000023363	1.00E-05	ENSDART00000131159	1.00E-09
538	rud_dec_c10576	0.6235904	7.81E-01	0.80472255	0.33732462	0.24954121	32	0.043460317	0.02445805	0.018208617	1.154010692744120E-03	0.9729005	8.82449E-06	0.0270995	0.072311254	gene538	rud_dec_c10576	epidermal growth factor receptor	F:ATP binding, P:transmembrane receptor protein tyrosine kinase signaling pathway, F:receptor activity, F:transmembrane receptor protein tyrosine kinase activity, C:membrane, P:protein amino acid phosphorylation, F:protein binding		egfr_drome ame: full=epidermal growth factor receptor short=egfr ame: full=drosophila relative of erbb ame: full=gurken receptor ame: full=protein torpedo flags: precursor		sp|P04412|EGFR_DROME	ENSDARP00000105384	ENSP00000378880	ENSXETP00000000932	ENSGACP00000012087	ENSORLP00000009628	ENSDARP00000049892	ENSTRUP00000025976	ENSTNIP00000018114	ENSBTAP00000015445	ENSMUSP00000099948	FBpp0071571	ENSCSAVP00000009061		ENSCINP00000002277
540	rud_dec2_c1941	0.84994775	9.10E-01	0.50283724	0.4958898	0.61202097	32	0.032340136	0.031659864	0.034340136	1.088792787868440E-03	0.9736771	8.83154E-06	0.0263229	0.075680054	gene540	rud_dec2_c1941	cop9 (constitutive photomorphogenic) subunit 6 (arabidopsis thaliana) isoform cra_a	F:protein binding, C:signalosome	monodelphis domestica cop9 signalosome complex subunit 6-like mrna	csn6_pig ame: full=cop9 signalosome complex subunit 6 short=sgn6 short=signalosome subunit 6	C:cytoplasm, C:signalosome	sp|Q5REY0|CSN6_PONAB		ENSP00000400617	ENSXETP00000019969	ENSGACP00000021647	ENSORLP00000000681	ENSDARP00000017850	ENSTRUP00000037066	ENSTNIP00000018803	ENSBTAP00000003725	ENSMUSP00000106576	FBpp0083658	ENSCSAVP00000014320		ENSCINP00000001153			ENST00000426712	2.00E-17	ENSXETT00000019969	9.00E-13	ENSGACT00000021688	9.00E-07	ENSORLT00000000681	3.00E-06
542	AS_rud_dec_c29492	0.41696078	6.54E-01	0.8394884	0.61948836	0.1027435	32	0.044698413	0.036666667	0.010244898	3.763054737646590E-04	0.9845231	8.92991E-06	0.0154769	0.162943523	gene542	AS_rud_dec_c29492
543	rud_dec_c26445	0.15947324	4.21E-01	0.030285869	0.2868914	0.3415635	32	0.006634921	0.022099773	0.022580499	1.644917949988660E-03	0.9676486	8.77686E-06	0.0323514	0.057881753	gene543	rud_dec_c26445				sptb2_mouse ame: full=spectrin beta brain 1 ame: full=beta-ii spectrin ame: full=embryonic liver fodrin ame: full=fodrin beta chain ame: full= non-erythroid beta chain 1		sp|Q62261|SPTB2_MOUSE		ENSP00000349259			ENSORLP00000006839				ENSBTAP00000009208	ENSMUSP00000011877
544	new_rud_dec_c15146	0.3749175	6.23E-01	0.99292827	0.12700504	0.7857043	32	0.049786848	0.013142857	0.041337868	7.804882921095660E-02	0.7799592	7.07446E-06	0.2200408	0.318391932	gene544	new_rud_dec_c15146			ruditapes philippinarum srp54 intron isolate ai16
548	AS_rud_dec_c25420	0.24911775	5.17E-01	0.084720075	0.32019132	0.94607586	32	0.011306122	0.023659864	0.047931973	8.326548022409950E-03	0.927294	8.41083E-06	0.072706	0.115165719	gene548	AS_rud_dec_c25420	copper chaperone for superoxide dismutase			ccs_human ame: full=copper chaperone for superoxide dismutase ame: full=superoxide dismutase copper chaperone	C:cytoplasm, C:soluble fraction, F:copper ion binding, F:protein binding, C:nucleus, P:intracellular copper ion transport, F:copper ion transmembrane transporter activity	sp|O14618|CCS_HUMAN	ENSDARP00000120216	ENSP00000433609		ENSGACP00000025152	ENSORLP00000010088	ENSDARP00000093518	ENSTRUP00000013501	ENSTNIP00000009636	ENSBTAP00000005683	ENSMUSP00000035486				ENSCINP00000008786
549	newAS_rud_dec_c20008	0.11158404	3.57E-01	0.25868198	0.09717293	0.0262911	32	0.021301587	0.011034014	0.00429932	3.426984896464090E-04	0.9852303	8.93633E-06	0.0147697	0.172830577	gene549	newAS_rud_dec_c20008
550	newAS_rud_dec_c30026	0.5210836	7.21E-01	0.73992664	0.8921483	0.15272489	32	0.040993197	0.046331066	0.013124717	1.263596029048130E-03	0.9716435	8.81309E-06	0.0283565	0.067539693	gene550	newAS_rud_dec_c30026																															ENSDART00000067596	0.00001
552	AS_rud_dec_c31172	0.12127488	3.71E-01	0.13815264	0.22400476	0.38857484	32	0.014825397	0.018816327	0.024798186	2.467826493557360E-05	0.9960363	9.03434E-06	0.0039637	0.432592724	gene552	AS_rud_dec_c31172	hypothetical protein BRAFLDRAFT_264576 [Branchiostoma floridae]	F:phosphoprotein phosphatase activity	saccoglossus kowalevskii protein phosphatase catalytic subunit-like mrna	pp4c_xenla ame: full=serine threonine-protein phosphatase 4 catalytic subunit short=pp4c short=pp4	C:microtubule organizing center, F:phosphoprotein phosphatase activity, F:metal ion binding, C:nucleus	sp|Q6P861|PP4C_XENTR	ENSDARP00000103385	ENSP00000279387	ENSXETP00000044675	ENSGACP00000007237	ENSORLP00000021689	ENSDARP00000103385	ENSTRUP00000029041	ENSTNIP00000001063	ENSBTAP00000017178	ENSMUSP00000032936	FBpp0077017	ENSCSAVP00000007140	Y75B8A.30		ENSBTAT00000017178	6.00E-27	ENST00000279387	3.00E-27	ENSXETT00000044675	2.00E-33	ENSGACT00000007255	1.00E-29	ENSORLT00000021690	4.00E-34	ENSDART00000103741	4.00E-32
553	AS_rud_dec_c25241	0.20365971	4.74E-01	0.05790121	0.22305861	0.19511643	32	0.00937415	0.018721088	0.015360544	1.325543818666110E-03	0.970957	8.80687E-06	0.029043	0.065723874	gene553	AS_rud_dec_c25241													ENSTRUP00000019099	ENSTNIP00000004854
554	rud_dec_c20647	0.34992358	6.02E-01	0.80387026	0.12291156	0.7397897	32	0.043419501	0.012870748	0.039342404	4.317599137380050E-04	0.9834221	8.91993E-06	0.0165779	0.148688521	gene554	rud_dec_c20647
555	new_rud_dec_c15181	0.006352775	9.20E-02	0.001140777	0.052378204	0.054966558	32	0.001324263	0.007623583	0.006997732	1.824881327479480E-03	0.9659258	8.76123E-06	0.0340742	0.056874607	gene555	new_rud_dec_c15181	c1q domain containing protein 1q75
556	rud_dec2_c1263	0.08199718	3.10E-01	0.024762124	0.81667686	0.61604464	32	0.00585941	0.04370068	0.034530612	4.540668056957880E-01	0.50041	4.53887E-06	0.49959	0.623808402	gene556	rud_dec2_c1263	inhibitor of apoptosis protein			birc7_human ame: full=baculoviral iap repeat-containing protein 7 ame: full=kidney inhibitor of apoptosis protein short=kiap ame: full=livin ame: full=melanoma inhibitor of apoptosis protein short=ml-iap ame: full=ring finger protein 50	F:metal ion binding, P:antiapoptosis, F:enzyme binding, P:activation of JUN kinase activity, P:DNA fragmentation involved in apoptosis, C:intracellular part	sp|Q96CA5|BIRC7_HUMAN	ENSDARP00000111684	ENSP00000359352	ENSXETP00000029187	ENSGACP00000003419	ENSORLP00000012199	ENSDARP00000075338	ENSTRUP00000011959	ENSTNIP00000012883	ENSBTAP00000006463	ENSMUSP00000104503	FBpp0075255	ENSCSAVP00000018681		ENSCINP00000002256
558	rud_dec_c11469	0.05584275	2.54E-01	0.109218955	0.4927595	0.09039702	32	0.012988662	0.031519274	0.009464853	5.506076687993290E-04	0.9812793	8.90049E-06	0.0187207	0.126135866	gene558	rud_dec_c11469	vacuolar protein sorting 26 homolog b-like		danio rerio vacuolar protein sorting 26 homolog like mrna	vp26b_xentr ame: full=vacuolar protein sorting-associated protein 26b ame: full=vesicle protein sorting 26b	C:retromer complex, P:protein transport, C:cytoplasm, P:vacuolar transport	sp|Q5BKM4|VP26B_XENTR	ENSDARP00000072251	ENSP00000434162	ENSXETP00000018272	ENSGACP00000026658	ENSORLP00000006560	ENSDARP00000072251	ENSTRUP00000007554	ENSTNIP00000003550	ENSBTAP00000019761	ENSMUSP00000034470	FBpp0070298	ENSCSAVP00000019866	T20D3.7b	ENSCINP00000023323	ENSBTAT00000022455	1.00E-58	ENST00000263559	9.00E-57	ENSXETT00000019433	6.00E-63	ENSGACT00000026710	2.00E-56	ENSORLT00000006561	6.00E-68	ENSDART00000077785	7.00E-84
559	newAS_rud_dec_rep_c45910	0.006320287	9.17E-02	0.029077541	0.028675415	0.001502294	32	0.00645805	0.00524263	0.000630385	1.930019660052770E+00	0.1647563	1.49439E-06	0.8352437	0.896047816	gene559	newAS_rud_dec_rep_c45910			venerupis philippinarum clone replacement histone complete cds
560	rud_dec_c19484	0.14824495	4.07E-01	0.14119555	0.1508379	0.8759714	32	0.014997732	0.014585034	0.045002268	3.244606849984670E+00	0.07165888	6.49967E-07	0.92834112	0.958066114	gene560	rud_dec_c19484	PREDICTED: LOW QUALITY PROTEIN: hypothetical protein LOC551259 [Apis mellifera]			titin_human ame: full=titin ame: full=connectin ame: full=rhabdomyosarcoma antigen mu-rms-	P:cardiac muscle fiber development, P:striated muscle contraction, F:alphaactinin binding, P:regulation of protein kinase activity, P:cardiac myofibril assembly, P:skeletal muscle thick filament assembly, F:protein selfassociation, F:telethonin binding, P:mitotic chromosome condensation, P:response to calcium ion, P:sarcomere organization, F:calcium ion binding, C:striated muscle thin filament, C…	sp|A2ASS6|TITIN_MOUSE	ENSDARP00000019103	ENSP00000286104	ENSXETP00000032923	ENSGACP00000011269	ENSORLP00000024981	ENSDARP00000000769	ENSTRUP00000045338	ENSTNIP00000005577	ENSBTAP00000011830	ENSMUSP00000107477	FBpp0072728	ENSCSAVP00000004783	F54E2.3d
563	newAS_rud_dec2_c639	0.037704222	2.12E-01	0.049548507	0.011556409	0.31303748	32	0.008580499	0.002997732	0.021274376	2.394005748556080E-04	0.9876552	8.95832E-06	0.0123448	0.209027236	gene563	newAS_rud_dec2_c639
566	AS_rud_dec_c21922	0.23696516	5.06E-01	0.7643682	0.16070816	0.36497948	32	0.041968254	0.015206349	0.023673469	4.757100140409420E-02	0.8273451	7.50426E-06	0.1726549	0.256561737	gene566	AS_rud_dec_c21922
567	rud_dec_c9864	0.036512718	2.09E-01	0.13382414	0.5379064	0.019273875	32	0.014535147	0.033455782	0.003560091	7.363795674200440E-02	0.7861117	7.13026E-06	0.2138883	0.310590269	gene567	rud_dec_c9864	proteasome subunit alpha	C:cytoplasm, C:proteasome core complex. alphasubunit complex, P:ubiquitindependent protein catabolic process, C:nucleus, F:threoninetype endopeptidase activity	anolis carolinensis proteasome subunit alpha type-5-like mrna	psa5_mouse ame: full=proteasome subunit alpha type-5 ame: full=macropain zeta chain ame: full=multicatalytic endopeptidase complex zeta chain ame: full=proteasome zeta chain	P:negative regulation of ubiquitinprotein ligase activity during mitotic cell cycle, F:threoninetype endopeptidase activity, P:anaphasepromoting complexdependent proteasomal ubiquitindependent protein catabolic process, P:positive regulation of ubiquitinprotein ligase activity during mitotic cell cycle, F:protein binding, C:proteasome core complex. alphasubunit complex, C:cytoplasm, C:nucleus	sp|Q9Z2U1|PSA5_MOUSE	ENSDARP00000113355	ENSP00000271308	ENSXETP00000054631	ENSGACP00000000426	ENSORLP00000019982	ENSDARP00000009133	ENSTRUP00000004433	ENSTNIP00000010079	ENSBTAP00000027507	ENSMUSP00000088057	FBpp0086066	ENSCSAVP00000014927	F25H2.9.2	ENSCINP00000018974	ENSBTAT00000027507	2.00E-35	ENST00000484563	4.00E-34	ENSXETT00000054631	1.00E-38	ENSGACT00000000426	5.00E-30	ENSORLT00000019983	9.00E-39	ENSDART00000012859	8.00E-06
568	rud_dec_c2872	0.029368097	1.91E-01	0.06921049	0.08338561	0.22537749	32	0.010272109	0.010040816	0.016975057	6.336806575291120E-05	0.9936486	9.01269E-06	0.0063514	0.370431123	gene568	rud_dec_c2872	CYP356A1 [Crassostrea gigas]	F:metal ion binding		cp2u1_mouse ame: full=cytochrome p450 2u1		sp|Q4V8D1|CP2U1_RAT	ENSDARP00000048280	ENSP00000358903	ENSXETP00000033323	ENSGACP00000023107	ENSORLP00000002785	ENSDARP00000048280	ENSTRUP00000026527	ENSTNIP00000021190	ENSBTAP00000045676	ENSMUSP00000101944	FBpp0074381	ENSCSAVP00000001677	C12D5.7	ENSCINP00000024395
570	AS_rud_dec_c29785	0.124895364	3.76E-01	0.089947365	0.045963943	0.20101108	32	0.011668934	0.007079365	0.015646259	4.660492647303720E-04	0.9827765	8.91407E-06	0.0172235	0.142640601	gene570	AS_rud_dec_c29785	endonuclease reverse transcriptase
571	rud_dec_c35304	0.103268184	3.45E-01	0.16560961	0.112585865	0.5173362	32	0.016335601	0.012072562	0.030553288	2.990379872293820E-01	0.5844861	5.30146E-06	0.4155139	0.541267989	gene571	rud_dec_c35304	CYP356A1 [Crassostrea gigas]	F:metal ion binding, P:oxidation reduction, F:heme binding, F:oxidoreductase activity, F:electron carrier activity, F:iron ion binding, F:monooxygenase activity		cp1a1_spaau ame: full=cytochrome p450 1a1 ame: full=cypia1	F:heme binding, F:iron ion binding, C:membrane, F:electron carrier activity, P:oxidation reduction, F:aromatase activity, C:microsome, F:oxidoreductase activity, C:endoplasmic reticulum membrane, F:metal ion binding, C:endoplasmic reticulum, F:monooxygenase activity, F:oxidoreductase activity. acting on paired donors. with incorporation or reduction of molecular oxygen. reduced flavin or flavopro…	sp|O42457|CP1A1_SPAAU	ENSDARP00000033498	ENSP00000378488	ENSXETP00000045704	ENSGACP00000019391	ENSORLP00000018073	ENSDARP00000033498	ENSTRUP00000002327	ENSTNIP00000014891	ENSBTAP00000053212	ENSMUSP00000034865		ENSCSAVP00000002588	C45H4.17	ENSCINP00000022528
572	AS_rud_dec_c12020	0.7529491	8.53E-01	0.6095104	0.5948531	0.6150928	32	0.036598639	0.035818594	0.034485261	8.038735150535100E-04	0.9773809	8.86513E-06	0.0226191	0.095859415	gene572	AS_rud_dec_c12020	nip7_tetng ame: full=60s ribosome subunit biogenesis protein nip7 homolog	C:nucleolus, F:RNA binding, F:protein binding, P:ribosome assembly	tetraodon nigroviridis full-length cdna	nip7_tetng ame: full=60s ribosome subunit biogenesis protein nip7 homolog	C:nucleolus, F:RNA binding, F:protein binding, P:ribosome assembly	sp|Q4T2X8|NIP7_TETNG	ENSDARP00000076524	ENSP00000254940	ENSXETP00000038700	ENSGACP00000021515	ENSORLP00000014708	ENSDARP00000076524	ENSTRUP00000000555	ENSTNIP00000007313	ENSBTAP00000002182	ENSMUSP00000034392	FBpp0084082	ENSCSAVP00000015591	C43E11.9.1		ENSBTAT00000002182	2.00E-60	ENST00000254940	2.00E-45	ENSXETT00000038700	3.00E-51	ENSGACT00000021556	3.00E-96	ENSORLT00000014709	3.00E-83	ENSDART00000082087	9.00E-43
573	rud_dec_c36683	0.10573424	3.49E-01	0.76372147	0.054036397	0.41864747	32	0.041931973	0.007759637	0.026176871	9.435319265094220E-05	0.9922498	9E-06	0.0077502	0.321167123	gene573	rud_dec_c36683	breast cancer anti-estrogen resistance 1-like						ENSDARP00000106517		ENSXETP00000010204	ENSGACP00000003049	ENSORLP00000023236	ENSDARP00000058771	ENSTRUP00000021127		ENSBTAP00000015922		FBpp0072376	ENSCSAVP00000019765
574	rud_dec_c13958	0.9741595	9.83E-01	0.6859406	0.76375395	0.8935385	32	0.039210884	0.041891156	0.045764172	3.445488987181980E+00	0.06342465	5.7528E-07	0.93657535	0.962150054	gene574	rud_dec_c13958	eukaryotic translation initiation factor 3 subunit c		Branchiostoma floridae hypothetical protein. mRNA	eif3c_xentr ame: full=eukaryotic translation initiation factor 3 subunit c short=eif3c ame: full=eukaryotic translation initiation factor 3 subunit 8	C:eukaryotic translation initiation factor 3 complex, P:translational initiation, F:translation initiation factor activity	sp|Q6P1V4|EIF3C_XENTR	ENSDARP00000111179	ENSP00000378950	ENSXETP00000006431	ENSGACP00000010152	ENSORLP00000007942	ENSDARP00000011344	ENSTRUP00000022502	ENSTNIP00000018267	ENSBTAP00000023384	ENSMUSP00000032992	FBpp0086013	ENSCSAVP00000011519	T23D8.4.2						ENSXETT00000056875	4.00E-07	ENSGACT00000010174	4.00E-07
577	AS_rud_dec_c16946	0.77047473	8.64E-01	0.40364206	0.5037701	0.9705154	32	0.028399093	0.031972789	0.048789116	1.880227546735110E-03	0.9654133	8.75658E-06	0.0345867	0.056894373	gene577	AS_rud_dec_c16946	hypothetical protein [Plasmodium yoelii yoelii str. 17XNL]						ENSDARP00000021727				ENSORLP00000006707	ENSDARP00000021727
578	rud_dec_rep_c10901	0.28283718	5.49E-01	0.21187685	0.9465945	0.29660997	32	0.018907029	0.048185941	0.020462585	6.107648450210940E-04	0.9802834	8.89146E-06	0.0197166	0.116910211	gene578	rud_dec_rep_c10901			venerupis decussatus partial srp54 gene for signal recognition particle 54-kda clone exons a-b
579	rud_dec_rep_c45819	0.4469452	6.73E-01	0.67767864	0.11229991	0.43090928	32	0.039006803	0.012049887	0.026657596	1.093331998384880E-02	0.916723	8.31495E-06	0.083277	0.13121246	gene579	rud_dec_rep_c45819									ENSXETP00000038005					ENSTNIP00000017112
580	rud_dec_c5068	0.9619521	9.75E-01	0.678161	0.72137237	0.9728153	32	0.039020408	0.040294785	0.048884354	1.467205037954490E-03	0.9694452	8.79315E-06	0.0305548	0.0616973	gene580	rud_dec_c5068			venerupis decussatus partial srp54 gene for signal recognition particle 54-kda clone exons a-b
581	rud_dec_rep_c18210	0.008442284	1.04E-01	0.2291085	0.000838747	0.10523071	32	0.019741497	0.000621315	0.010399093	2.329490120145800E+00	0.1269435	1.15141E-06	0.8730565	0.921898822	gene581	rud_dec_rep_c18210			venerupis decussatus partial srp54 gene for signal recognition particle 54-kda clone exons a-b
582	rud_dec_c1899	0.91783214	9.48E-01	0.97243166	0.5240722	0.6978192	32	0.049151927	0.032807256	0.037678005	7.278079913817230E-04	0.9784773	8.87508E-06	0.0215227	0.103329583	gene582	rud_dec_c1899	predicted protein [Nematostella vectensis]	F:transposase activity, P:transposition. DNAmediated, F:DNA binding					ENSDARP00000120409					ENSDARP00000103020
583	rud_dec2_rep_c2685	0.54529905	7.36E-01	0.9435295	0.19858822	0.38704872	32	0.048226757	0.017387755	0.024730159	1.137070785262030E-04	0.991492	8.99312E-06	0.008508	0.298674153	gene583	rud_dec2_rep_c2685	hypothetical protein BRAFLDRAFT_131258 [Branchiostoma floridae]		macaca mulatta transcription factor btf3 homolog 4-like mrna	bt3l4_danre ame: full=transcription factor btf3 homolog 4 ame: full=basic transcription factor 3-like 4	F:molecular_function, C:cellular_component	sp|Q6PC91|BT3L4_DANRE	ENSDARP00000099767	ENSP00000385967	ENSXETP00000017657	ENSGACP00000015811	ENSORLP00000004053	ENSDARP00000075664	ENSTRUP00000045213	ENSTNIP00000009399	ENSBTAP00000014646	ENSMUSP00000099800	FBpp0086895	ENSCSAVP00000016406	C56C10.8.2	ENSCINP00000024140	ENSBTAT00000014646	6.00E-60	ENST00000371599	6.00E-62	ENSXETT00000065992	1.00E-49	ENSGACT00000015851	1.00E-43	ENSORLT00000004054	4.00E-36	ENSDART00000112558	9.00E-48
585	rud_dec_c23236	0.07997594	3.06E-01	0.22581531	0.578928	0.06167109	32	0.019582766	0.03524263	0.007519274	6.471416753583980E-04	0.9797048	8.88621E-06	0.0202952	0.111466861	gene585	rud_dec_c23236	proline-rich protein bca3		tetraodon nigroviridis full-length cdna	bca3_human ame: full=proline-rich protein bca3 ame: full=akip1 ame: full=breast cancer-associated gene 3 protein ame: full=pka-interacting protein	F:protein binding	sp|Q9NQ31|BCA3_HUMAN	ENSDARP00000090899	ENSP00000431602			ENSORLP00000001401	ENSDARP00000090899		ENSTNIP00000005014	ENSBTAP00000002500	ENSMUSP00000033335											ENSGACT00000008638	1.00E-06	ENSORLT00000001402	4.00E-18
589	newAS_rud_dec_c19954	0.5186141	7.19E-01	0.26096988	0.4721895	0.8803148	32	0.021460317	0.030716553	0.045238095	5.060616515208940E-04	0.9820525	8.90751E-06	0.0179475	0.134216616	gene589	newAS_rud_dec_c19954			zebrafish dna sequence from clone ch211-119c17 in linkage group complete sequence
592	rud_dec_c1730	0.022811951	1.67E-01	0.004098101	0.84652776	0.8590794	32	0.002421769	0.044630385	0.044235828	2.016931001776350E-03	0.9641788	8.74539E-06	0.0358212	0.05836764	gene592	rud_dec_c1730	hypothetical protein DAPPUDRAFT_305933 [Daphnia pulex]
593	rud_dec_c16809	0.05788412	2.58E-01	0.36935988	0.21774682	0.061596572	32	0.026902494	0.018412698	0.007510204	4.396971330052110E-01	0.5072687	4.60108E-06	0.4927313	0.616851462	gene593	rud_dec_c16809	conserved hypothetical protein [Butyrivibrio crossotus DSM 2876]
594	rud_dec_c40685	0.31453824	5.73E-01	0.66602796	0.065943465	0.37794524	32	0.038557823	0.008684807	0.024321995	4.181495287980390E-04	0.9836854	8.92232E-06	0.0163146	0.149365312	gene594	rud_dec_c40685							ENSDARP00000000069		ENSXETP00000014969		ENSORLP00000015246	ENSDARP00000000069	ENSTRUP00000033380	ENSTNIP00000014537	ENSBTAP00000034568
595	AS_rud_dec2_c2229	0.7103415	8.28E-01	0.43991953	0.58417755	0.7137466	32	0.029791383	0.035428571	0.038367347	1.471066466820040E-03	0.9694051	8.79279E-06	0.0305949	0.061676588	gene595	AS_rud_dec2_c2229	PREDICTED: similar to predicted protein [Ciona intestinalis]			hpca_rat ame: full=neuron-specific calcium-binding protein hippocalcin ame: full=p23k	F:binding	sp|Q8WN03|KCIP2_MUSPF	ENSDARP00000105265	ENSP00000286993	ENSXETP00000002188	ENSGACP00000009780	ENSORLP00000010443	ENSDARP00000045915	ENSTRUP00000007023	ENSTNIP00000013696	ENSBTAP00000021742	ENSMUSP00000030572	FBpp0291979	ENSCSAVP00000006439		ENSCINP00000022812
597	rud_dec2_c2396	0.64559436	7.93E-01	0.86239856	0.9621931	0.24139528	32	0.045482993	0.048752834	0.017804989	1.387481367260070E-03	0.9702865	8.80078E-06	0.0297135	0.063623137	gene597	rud_dec2_c2396	hypothetical protein [Simulium vittatum]			myo3_schpo ame: full=myosin type-2 heavy chain 2 ame: full=myosin type ii heavy chain 2	F:protein binding, P:cytokinesis, C:cytoplasmic part, C:cytoskeletal part, C:actin cytoskeleton	sp|O14157|MYO3_SCHPO	ENSDARP00000084927	ENSP00000411665	ENSXETP00000029410	ENSGACP00000021369	ENSORLP00000016415	ENSDARP00000099841	ENSTRUP00000034473	ENSTNIP00000013183	ENSBTAP00000039875	ENSMUSP00000045239	FBpp0072899	ENSCSAVP00000013839	F52B10.1	ENSCINP00000016484
599	rud_dec_c15211	0.7973472	8.80E-01	0.8729289	0.47980314	0.46097422	32	0.045782313	0.031015873	0.027972789	1.037533420117140E-03	0.974304	8.83722E-06	0.025696	0.07872346	gene599	rud_dec_c15211	protein muted homolog			muted_pig ame: full=protein muted homolog	P:vesiclemediated transport, P:developmental pigmentation, P:otolith morphogenesis, F:protein binding	sp|A5A777|MUTED_PIG	ENSDARP00000075956	ENSP00000380598				ENSDARP00000075956			ENSBTAP00000025619	ENSMUSP00000036614
600	AS_rud_dec_c12295	0.009733437	1.10E-01	0.001062097	0.18408564	0.37186283	32	0.001297052	0.01662585	0.024018141	1.070729411480890E-04	0.991744	8.99541E-06	0.008256	0.307452324	gene600	AS_rud_dec_c12295	strombine dehydrogenase	F:oxidoreductase activity, F:coenzyme binding, P:metabolic process	nematostella vectensis protein complete cds	y4xo_rhisn ame: full=uncharacterized protein y4xo	P:oxidation reduction, F:binding, F:oxidoreductase activity, P:metabolic process, F:catalytic activity, F:coenzyme binding	sp|P55707|Y4XO_RHISN
601	rud_dec_c3541	0.32734895	5.85E-01	0.12405645	0.53660965	0.61899966	32	0.013909297	0.033360544	0.03460771	5.195503298409670E-04	0.9818149	8.90535E-06	0.0181851	0.131531731	gene601	rud_dec_c3541			haliotis discus hannai clone co119 microsatellite sequences															ENSCSAVP00000002815		ENSCINP00000019364
602	rud_dec2_c2943	0.33592144	5.90E-01	0.7415017	0.53781193	0.19023551	32	0.041092971	0.033442177	0.015120181	3.132611671741180E-01	0.5756859	5.22164E-06	0.4243141	0.550131066	gene602	rud_dec2_c2943	unnamed protein product [Mus musculus]	P:biological regulation, F:receptor activity, F:peptide binding, P:Gprotein coupled receptor protein signaling pathway		ox2r_mouse ame: full=orexin receptor type 2 short=ox-2-r short=ox2-r short=ox2r ame: full=hypocretin receptor type 2		sp|P56719|OX2R_RAT	ENSDARP00000108604	ENSP00000359899	ENSXETP00000003414	ENSGACP00000003313	ENSORLP00000025664		ENSTRUP00000039173	ENSTNIP00000022261	ENSBTAP00000015561	ENSMUSP00000058230
603	rud_dec_c23443	0.2600133	5.27E-01	0.060417682	0.8775174	0.8636755	32	0.00955102	0.045773243	0.044430839	1.197873487285500E-03	0.9723905	8.81987E-06	0.0276095	0.070465274	gene603	rud_dec_c23443	PREDICTED: CG8568-like [Saccoglossus kowalevskii]																FBpp0074210		C09D4.2
605	AS_rud_dec2_c737	0.06546159	2.75E-01	0.0440363	0.1020739	0.7758021	32	0.008031746	0.011405896	0.040861678	6.596301577599200E-02	0.797308	7.23182E-06	0.202692	0.296362106	gene605	AS_rud_dec2_c737	ribosomal protein s12	C:ribosome, F:structural constituent of ribosome, P:translation	pinctada maxima ribosomal protein s12 complete cds	rs12_chick ame: full=40s ribosomal protein s12	C:ribosome, F:structural constituent of ribosome, P:translation	sp|P84175|RS12_CHICK	ENSDARP00000053541	ENSP00000230050	ENSXETP00000000210	ENSGACP00000014458	ENSORLP00000020609	ENSDARP00000053541	ENSTRUP00000011645	ENSTNIP00000019422	ENSBTAP00000001791	ENSMUSP00000073581	FBpp0075612	ENSCSAVP00000009335	F54E7.2.1	ENSCINP00000014372	ENSBTAT00000001791	4.00E-73	ENST00000230050	2.00E-78	ENSXETT00000000210	7.00E-57	ENSGACT00000014484	4.00E-54	ENSORLT00000020610	4.00E-47	ENSDART00000053542	6.00E-42
608	rud_dec_c9363	0.39738515	6.41E-01	0.44176552	0.10438349	0.67816055	32	0.029891156	0.011560091	0.036920635	9.009128722254890E-04	0.9760549	8.85311E-06	0.0239451	0.087602668	gene608	rud_dec_c9363
609	rud_dec_c5710	0.119466394	3.68E-01	0.05680151	0.5325924	0.47525522	32	0.009269841	0.033197279	0.028585034	8.923131421170180E-04	0.9761694	8.85414E-06	0.0238306	0.088297379	gene609	rud_dec_c5710	hypothetical protein BRAFLDRAFT_99090 [Branchiostoma floridae]	P:proteolysis, F:cysteinetype peptidase activity, F:cysteinetype endopeptidase activity		crust_panbo ame: full=crustapain ame: full= ys flags: precursor	P:collagen catabolic process, F:cysteinetype peptidase activity	sp|Q86GF7|CRUST_PANBO	ENSDARP00000053637	ENSP00000227266	ENSXETP00000055303	ENSGACP00000012726	ENSORLP00000015673	ENSDARP00000053637	ENSTRUP00000001340	ENSTNIP00000020399	ENSBTAP00000014735	ENSMUSP00000036801	FBpp0086719	ENSCSAVP00000017815	T03E6.7.2	ENSCINP00000019058
610	rud_dec_c8497	0.035712328	2.08E-01	0.2120236	0.13023652	0.13539255	32	0.018911565	0.013378685	0.01215873	7.568640681221260E-01	0.3843117	3.48582E-06	0.6156883	0.726864317	gene610	rud_dec_c8497	myosin heavy chain	C:myosin filament, F:motor activity	af039187schistosoma japonicum myosin partial cds	mys_aeqir ame: full=myosin heavy striated muscle	C:myosin filament, F:actin binding, F:ATP binding, C:myofibril, F:motor activity, F:calmodulin binding	sp|P24733|MYS_AEQIR	ENSDARP00000099772		ENSXETP00000026213	ENSGACP00000018205	ENSORLP00000007919	ENSDARP00000099772	ENSTRUP00000012029	ENSTNIP00000009781	ENSBTAP00000035421		FBpp0080457	ENSCSAVP00000019360	T18D3.4
611	rud_dec_c2283	0.3058336	5.67E-01	0.10419975	0.7494103	0.68861365	32	0.012698413	0.041378685	0.037287982	1.826959576760600E-03	0.9659064	8.76106E-06	0.0340936	0.056863936	gene611	rud_dec_c2283	PREDICTED: hypothetical protein LOC100608363 [Pan troglodytes]						ENSDARP00000110743	ENSP00000415308	ENSXETP00000001452		ENSORLP00000023193	ENSDARP00000067827	ENSTRUP00000025259		ENSBTAP00000039696			ENSCSAVP00000000881		ENSCINP00000001207
612	AS_rud_dec_c17303	0.44261783	6.70E-01	0.40967277	0.9245628	0.13558714	32	0.028666667	0.047360544	0.012176871	5.592895625454730E-04	0.9811323	8.89916E-06	0.0188677	0.124912106	gene612	AS_rud_dec_c17303	predicted protein [Nematostella vectensis]	P:response to stress		uspal_arath ame: full=universal stress protein a-like protein		sp|Q8LGG8|USPAL_ARATH												ENSCSAVP00000002779		ENSCINP00000019364
613	AS_rud_dec_c11019	0.2944003	5.59E-01	0.95157444	0.4051644	0.070017025	32	0.048498866	0.027723356	0.008145125	8.378565871680620E-05	0.9926967	9.00405E-06	0.0073033	0.328588881	gene613	AS_rud_dec_c11019	ap partial		pediculus humanus corporis recombination repair mrna	apex1_danre ame: full=dna-(apurinic or apyrimidinic site) lyase ame: full=apex nuclease short=apen ame: full=apurinic-apyrimidinic endonuclease 1 short=ap endonuclease 1 short=zap1		sp|A0MTA1|APEX1_DANRE	ENSDARP00000110718	ENSP00000400658	ENSXETP00000045430	ENSGACP00000025771	ENSORLP00000015494	ENSDARP00000067373	ENSTRUP00000010124	ENSTNIP00000008494	ENSBTAP00000003559	ENSMUSP00000126858	FBpp0288680	ENSCSAVP00000012148	R09B3.1a.3	ENSCINP00000016620	ENSBTAT00000003559	1.00E-10			ENSXETT00000045430	4.00E-28			ENSORLT00000015495	2.00E-06
615	rud_dec_c2623	0.079851024	3.06E-01	0.01602805	0.15579696	0.20827207	32	0.004634921	0.014902494	0.016072562	1.512796104975670E-03	0.9689744	8.78888E-06	0.0310256	0.060734361	gene615	rud_dec_c2623	GH24043 [Drosophila grimshawi]	F:isomerase activity	saccoglossus kowalevskii protein (peptidyl-prolyl cis trans isomerase) nima-interacting 1-like mrna	dod_drome ame: full=protein dodo		sp|P54353|DOD_DROME	ENSDARP00000105519	ENSP00000247970	ENSXETP00000012881	ENSGACP00000021900	ENSORLP00000011706	ENSDARP00000023444	ENSTRUP00000034770	ENSTNIP00000008317	ENSBTAP00000022592	ENSMUSP00000034689	FBpp0076894	ENSCSAVP00000004481	Y110A2AL.13	ENSCINP00000023570	ENSBTAT00000022592	3.00E-11	ENST00000247970	1.00E-06	ENSXETT00000012881	6.00E-08	ENSGACT00000021941	5.00E-28	ENSORLT00000011707	3.00E-16
617	rud_dec_c38551	0.037417293	2.12E-01	0.031607606	0.03730801	0.029827744	32	0.006811791	0.006226757	0.004689342	1.165653363017320E-03	0.9727642	8.82326E-06	0.0272358	0.071788671	gene617	rud_dec_c38551			candidatus phytoplasma mali strain at complete chromosome			sp|Q6YPW8|PLSX_ONYPE
618	AS_rud_dec2_c2573	0.13656843	3.91E-01	0.03901695	0.88388157	0.12957667	32	0.007619048	0.046004535	0.011809524	1.288211177211450E-03	0.9713687	8.8106E-06	0.0286313	0.066610979	gene618	AS_rud_dec2_c2573	reelin [Lacerta viridis]		taeniopygia guttata reelin mrna	reln_chick ame: full=reelin	P:cell migration, P:brain development, P:phosphorylation, P:regulation of cellular process, C:cell part, F:catalytic activity, P:generation of neurons, C:extracellular region part, P:cell morphogenesis involved in differentiation	sp|O93574|RELN_CHICK	ENSDARP00000010687	ENSP00000392339	ENSXETP00000050071	ENSGACP00000013192	ENSORLP00000005849	ENSDARP00000010687	ENSTRUP00000043631	ENSTNIP00000019125	ENSBTAP00000004768	ENSMUSP00000110805		ENSCSAVP00000001508		ENSCINP00000023017			ENST00000448171	6.00E-06
619	newAS_rud_dec_c4775	0.43765125	6.67E-01	0.9966227	0.32310206	0.14547282	32	0.049882086	0.023750567	0.01275737	5.419919207423610E-02	0.8159111	7.40055E-06	0.1840889	0.271902981	gene619	newAS_rud_dec_c4775			gibbula cineraria clone gcin52 microsatellite sequence
620	newAS_rud_dec_c18362	0.6432458	7.92E-01	0.5283897	0.8891411	0.40807936	32	0.033451247	0.046195011	0.025723356	1.585101526870850E-04	0.9899548	8.97918E-06	0.0100452	0.261768888	gene620	newAS_rud_dec_c18362			dosinia exoleta satellite dex265d sequence
621	rud_dec2_rep_c3228	0.43628526	6.66E-01	0.28994527	0.3479814	0.7254877	32	0.023015873	0.025006803	0.038807256	7.096752780552150E-01	0.3995516	3.62405E-06	0.6004484	0.714612688	gene621	rud_dec2_rep_c3228	mysp_mytga ame: full=paramyosin	C:myofibril, C:myosin filament, F:motor activity	haliotis discus discus hald2 mrna for complete cds	mysp_mytga ame: full=paramyosin	C:myofibril, C:myosin filament, F:motor activity	sp|O96064|MYSP_MYTGA	ENSDARP00000108536	ENSP00000347507	ENSXETP00000051650	ENSGACP00000018205	ENSORLP00000019711	ENSDARP00000088086	ENSTRUP00000012029	ENSTNIP00000010114	ENSBTAP00000053217	ENSMUSP00000126840	FBpp0080457	ENSCSAVP00000004661	F58G4.1	ENSCINP00000019346
622	rud_dec_rep_c31086	0.49822724	7.06E-01	0.25875148	0.5192916	0.6802212	32	0.021306122	0.03260771	0.036997732	2.511629684710210E-01	0.6162574	5.58964E-06	0.3837426	0.508473937	gene622	rud_dec_rep_c31086	small nuclear ribonucleoprotein g		xenopus tropicalis small nuclear ribonucleoprotein polypeptide g mrna	ruxg_drome ame: full=probable small nuclear ribonucleoprotein g short=snrnp-g ame: full=sm protein g short=sm-g short=	P:nucleartranscribed mRNA catabolic process. nonsensemediated decay, P:negative regulation of translation, P:RNA interference, F:translation repressor activity. nucleic acid binding, F:mRNA 3'UTR binding, P:mitotic spindle organization, P:establishment of RNA localization, F:protein kinase activity, C:precatalytic spliceosome, F:SUMO binding, C:small nuclear ribonucleoprotein complex, P:phosphory…	sp|Q9VXE0|RUXG_DROME	ENSDARP00000097927	ENSP00000272348	ENSXETP00000018638	ENSGACP00000017453	ENSORLP00000002669	ENSDARP00000097927	ENSTRUP00000009580	ENSTNIP00000006094	ENSBTAP00000051461	ENSMUSP00000086987	FBpp0074151		Y71F9B.4.2	ENSCINP00000024810	ENSBTAT00000056122	4.00E-23	ENST00000418788	1.00E-19	ENSXETT00000018638	7.00E-32	ENSGACT00000017487	2.00E-13	ENSORLT00000002670	6.00E-19	ENSDART00000108986	7.00E-23
623	rud_dec_c30390	0.61235446	7.76E-01	0.21140778	0.48533243	0.6898769	32	0.018870748	0.031210884	0.037337868	1.095727912456820E-04	0.9916481	8.99454E-06	0.0083519	0.30484435	gene623	rud_dec_c30390
624	rud_dec2_rep_c3456	0.117390595	3.65E-01	0.03238048	0.13404907	0.18084218	32	0.006902494	0.013591837	0.014698413	2.002107623627580E-02	0.8874782	8.04969E-06	0.1125218	0.173788399	gene624	rud_dec2_rep_c3456	cathepsin l2 cysteine protease	F:cysteinetype peptidase activity	hydra magnipapillata cathepsin l mrna	catl1_cerae ame: full=cathepsin l1 ame: full=major excreted protein short=mep contains: ame: full=cathepsin l1 heavy chain contains: ame: full=cathepsin l1 light chain flags: precursor	F:peptidase activity	sp|Q9GKL8|CATL1_CERAE	ENSDARP00000007127	ENSP00000259470	ENSXETP00000057468	ENSGACP00000019249	ENSORLP00000025760	ENSDARP00000007127	ENSTRUP00000040431	ENSTNIP00000020399	ENSBTAP00000000962	ENSMUSP00000021933	FBpp0086719	ENSCSAVP00000017955	T03E6.7.2	ENSCINP00000015732	ENSBTAT00000000962	8.00E-22	ENST00000259470	8.00E-18	ENSXETT00000057468	1.00E-25	ENSGACT00000012750	1.00E-37	ENSORLT00000015674	6.00E-29	ENSDART00000017756	3.00E-30
626	rud_dec_c34955	0.014188484	1.32E-01	0.019831894	0.16224001	0.26837412	32	0.005210884	0.015360544	0.019265306	1.035209673329970E-02	0.9189589	8.33523E-06	0.0810411	0.127963909	gene626	rud_dec_c34955
627	AS_rud_dec_c19533	0.15206936	4.12E-01	0.030983876	0.93848187	0.2685445	32	0.006725624	0.047918367	0.019283447	1.404355742465660E-03	0.9701065	8.79915E-06	0.0298935	0.063258985	gene627	AS_rud_dec_c19533	novel protein (zgc:77421)		osmerus mordax clone omor-eva-520-152 probable uracil phosphoribosyltransferase 1 complete cds	upp_danre ame: full=uracil phosphoribosyltransferase homolog		sp|Q6NYU7|UPP_DANRE	ENSDARP00000051528	ENSP00000362477	ENSXETP00000009952	ENSGACP00000024101	ENSORLP00000007680	ENSDARP00000051528	ENSTRUP00000021995	ENSTNIP00000011808	ENSBTAP00000005978	ENSMUSP00000085175	FBpp0076818	ENSCSAVP00000015740	C47B2.2b.1		ENSBTAT00000005978	5.00E-18	ENST00000456799	5.00E-20	ENSXETT00000009952	1.00E-24	ENSGACT00000024148	2.00E-21	ENSORLT00000007681	5.00E-29	ENSDART00000051529	1.00E-21
628	rud_dec_c42440	0.00776527	1.00E-01	0.14801213	0.75769395	0.008001625	32	0.015424036	0.041678005	0.001904762	8.011826353383690E+00	0.004647284	4.21522E-08	0.995352716	0.99770601	gene628	rud_dec_c42440	type ii phosphatidylinositol-4-phosphate 5-kinase 53k		sus scrofa phosphatidylinositol-5-phosphate 4-kinase type-2 alpha-like mrna	pi42a_chick ame: full=phosphatidylinositol-5-phosphate 4-kinase type-2 alpha ame: full=1-phosphatidylinositol-5-phosphate 4-kinase 2-alpha ame: full=diphosphoinositide kinase 2-alpha ame: full=phosphatidylinositol-5-phosphate 4-kinase type ii alpha short=pi p 4-kinase type ii alpha short=pip4kii-alpha ame: full= ns p-4-kinase isoform 2-alpha	F:transferase activity	sp|Q5F356|PI42A_CHICK	ENSDARP00000003352	ENSP00000365757	ENSXETP00000051185	ENSGACP00000023976	ENSORLP00000009006	ENSDARP00000003352	ENSTRUP00000005623	ENSTNIP00000021404	ENSBTAP00000024007	ENSMUSP00000006912	FBpp0099993	ENSCSAVP00000019581	Y48G9A.8	ENSCINP00000013399	ENSBTAT00000024007	1.00E-08			ENSXETT00000051185	4.00E-13	ENSGACT00000024023	4.00E-14	ENSORLT00000009007	1.00E-07	ENSDART00000109568	2.00E-08
629	rud_dec2_c2564	0.3533315	6.05E-01	0.203778	0.8910767	0.17470007	32	0.01844898	0.046290249	0.014358277	8.315500608091490E-04	0.9769949	8.86163E-06	0.0230051	0.093746846	gene629	rud_dec2_c2564	vacuolar protein sorting-associated protein 29		hydra magnipapillata protein mrna	vps29_ponab ame: full=vacuolar protein sorting-associated protein 29 ame: full=vesicle protein sorting 29	F:metal ion binding, C:endosome membrane, F:phosphoserine phosphatase activity, P:protein transport	sp|Q3T0M0|VPS29_BOVIN	ENSDARP00000092020	ENSP00000353786	ENSXETP00000052892	ENSGACP00000006222	ENSORLP00000022447	ENSDARP00000092020	ENSTRUP00000015929	ENSTNIP00000015363	ENSBTAP00000011076	ENSMUSP00000113525	FBpp0077625	ENSCSAVP00000010074	ZK1128.8b	ENSCINP00000009651	ENSBTAT00000011076	5.00E-85	ENST00000447578	3.00E-84	ENSXETT00000052892	2.00E-70					ENSDART00000101246	3.00E-71
630	rud_dec_c35667	0.5142814	7.17E-01	0.8441917	0.15578644	0.3810472	32	0.044884354	0.014897959	0.024439909	1.017719933940950E-03	0.9745504	8.83946E-06	0.0254496	0.079718937	gene630	rud_dec_c35667				trak2_human ame: full=trafficking kinesin-binding protein 2 ame: full=amyotrophic lateral sclerosis 2 chromosomal region candidate gene 3 protein	F:receptor binding, C:cytoplasm	sp|O60296|TRAK2_HUMAN		ENSP00000328875	ENSXETP00000030329	ENSGACP00000018699					ENSBTAP00000019878	ENSMUSP00000027186
631	rud_dec_c13041	0.78519297	8.73E-01	0.47144768	0.9597362	0.640913	32	0.031147392	0.048680272	0.03552381	1.713878617351830E-03	0.9669778	8.77077E-06	0.0330222	0.057260297	gene631	rud_dec_c13041	dynein light chain axonemal	C:microtubule associated complex, F:microtubule motor activity, P:microtubulebased process	nematostella vectensis protein partial mrna	dnal4_human ame: full=dynein light chain axonemal	P:microtubulebased movement, C:plasma membrane, C:axonemal dynein complex, C:centrosome, F:ATPase activity. coupled, F:microtubule motor activity, C:microtubule	sp|A4F4L4|DNAL4_PIG	ENSDARP00000108969	ENSP00000413154	ENSXETP00000015096	ENSGACP00000026228	ENSORLP00000013174	ENSDARP00000041075	ENSTRUP00000008556	ENSTNIP00000022025	ENSBTAP00000037496	ENSMUSP00000023055	FBpp0290349	ENSCSAVP00000013998	T26A5.9.3		ENSBTAT00000037671	9.00E-11	ENST00000437501	2.00E-27	ENSXETT00000015096	1.00E-52	ENSGACT00000026279	3.00E-22	ENSORLT00000013175	9.00E-16	ENSDART00000129305	2.00E-40
632	rud_dec_c13072	0.2759794	5.41E-01	0.6260506	0.08626915	0.9295875	32	0.03724263	0.010235828	0.047170068	2.576141025544980E-01	0.6117641	5.54888E-06	0.3882359	0.512640672	gene632	rud_dec_c13072														ENSTNIP00000007082
634	AS_rud_dec_c20671	0.6443857	7.93E-01	0.3399201	0.6077194	0.7292118	32	0.025451247	0.036321995	0.03892517	1.417199733111820E-03	0.9699702	8.79792E-06	0.0300298	0.062931271	gene634	AS_rud_dec_c20671
635	newAS_rud_dec_c9396	0.073160596	2.91E-01	0.46296743	0.009677398	0.44503444	32	0.030825397	0.002657596	0.027274376	7.345471942112450E-01	0.3914132	3.55023E-06	0.6085868	0.720873877	gene635	newAS_rud_dec_c9396			venerupis philippinarum tm-rudp mrna for complete cds
637	rud_dec_c38995	0.9453753	9.64E-01	0.7484845	0.57338035	0.7591801	32	0.041405896	0.034975057	0.040163265	1.442441449569280E-03	0.969704	8.7955E-06	0.030296	0.062304628	gene637	rud_dec_c38995	carnitine isoform cra_a	C:peroxisome, P:fatty acid metabolic process, C:endoplasmic reticulum, C:mitochondrion		cacp_rat ame: full=carnitine o-acetyltransferase short=carnitine acetylase ame: full=carnitine acetyltransferase short=cat short=	C:peroxisome, P:fatty acid metabolic process, C:endoplasmic reticulum, C:mitochondrion	sp|Q704S8|CACP_RAT	ENSDARP00000089338	ENSP00000277468	ENSXETP00000041147	ENSGACP00000016066	ENSORLP00000016903	ENSDARP00000089338	ENSTRUP00000016658	ENSTNIP00000010009	ENSBTAP00000002513	ENSMUSP00000028207	FBpp0082848	ENSCSAVP00000014663	T20B3.1	ENSCINP00000025604
638	AS_rud_dec_c16440	0.9548263	9.70E-01	0.9249553	0.6213542	0.7767863	32	0.04753288	0.036730159	0.0409161	1.527517830311350E-03	0.9688238	8.78752E-06	0.0311762	0.060226998	gene638	AS_rud_dec_c16440	hypothetical protein BRAFLDRAFT_221898 [Branchiostoma floridae]			rpgr1_bovin ame: full=x-linked retinitis pigmentosa gtpase regulator-interacting protein 1 short=rpgr-interacting protein 1	P:visual perception, C:axoneme, C:cilium, P:response to stimulus, P:eye photoreceptor cell development, F:protein binding	sp|Q9GLM3|RPGR1_BOVIN	ENSDARP00000107329	ENSP00000309721		ENSGACP00000026288	ENSORLP00000004960	ENSDARP00000101765	ENSTRUP00000032783	ENSTNIP00000009824	ENSBTAP00000050597	ENSMUSP00000107226
639	rud_dec_c8615	0.095584214	3.34E-01	0.019472383	0.16089818	0.30958125	32	0.005170068	0.01523356	0.021079365	1.270178811410000E-03	0.9715698	8.81242E-06	0.0284302	0.067250235	gene639	rud_dec_c8615	plcl_mytga ame: full=perlucin-like protein flags: precursor			plcl_mytga ame: full=perlucin-like protein flags: precursor		sp|P86854|PLCL_MYTGA	ENSDARP00000026455	ENSP00000351954	ENSXETP00000001423	ENSGACP00000005387	ENSORLP00000013829	ENSDARP00000026455	ENSTRUP00000016822	ENSTNIP00000002763	ENSBTAP00000016163	ENSMUSP00000126070	FBpp0072553	ENSCSAVP00000005872	ZK1193.2	ENSCINP00000004176
640	rud_dec_c10882	0.08617444	3.17E-01	0.50150526	0.011579477	0.30553776	32	0.032290249	0.003006803	0.020888889	1.199705417068450E+00	0.2733806	2.47964E-06	0.7266194	0.816382188	gene640	rud_dec_c10882	PREDICTED: hypothetical protein [Saccoglossus kowalevskii]		PREDICTED: Saccoglossus kowalevskii hypothetical protein LOC100375473 (LOC100375473). mRNA	iqub_macfa ame: full=iq and ubiquitin-like domain-containing protein		sp|Q4R6T7|IQUB_MACFA	ENSDARP00000083250	ENSP00000388498	ENSXETP00000047878	ENSGACP00000011457	ENSORLP00000000651	ENSDARP00000083250	ENSTRUP00000041789	ENSTNIP00000013318	ENSBTAP00000046917	ENSMUSP00000051177	FBpp0083620	ENSCSAVP00000004546		ENSCINP00000010559	ENSBTAT00000050172	2.00E-07			ENSXETT00000047878	2.00E-33					ENSDART00000088817	2.00E-18
641	AS_rud_dec_c27547	0.7338989	8.42E-01	0.9125955	0.2686132	0.73115474	32	0.047120181	0.0210839	0.039038549	1.231068402773870E-03	0.9720107	8.81642E-06	0.0279893	0.068561345	gene641	AS_rud_dec_c27547	AGAP009139-PA [Anopheles gambiae str. PEST]						ENSDARP00000109169	ENSP00000416250	ENSXETP00000029186				ENSTRUP00000025259					ENSCSAVP00000002084		ENSCINP00000027185
642	rud_dec_c7926	0.8909885	9.33E-01	0.82729	0.6748621	0.64892906	32	0.044240363	0.038680272	0.035814059	4.628475807066930E-04	0.9828357	8.91461E-06	0.0171643	0.143334908	gene642	rud_dec_c7926	l-xylulose reductase	F:catalytic activity, P:metabolic process		der_chick ame: full=d-erythrulose reductase ame: full=probable l-xylulose reductase short=xr	P:oxidation reduction, F:erythrulose reductase activity, F:binding, F:oxidoreductase activity, C:cytoplasm	sp|Q8JIS3|DER_CHICK	ENSDARP00000119944	ENSP00000303356	ENSXETP00000010078	ENSGACP00000020297	ENSORLP00000003314	ENSDARP00000019859	ENSTRUP00000015175	ENSTNIP00000006174	ENSBTAP00000000813	ENSMUSP00000026148	FBpp0074425	ENSCSAVP00000019908	R11D1.11	ENSCINP00000019987
645	rud_dec_c18149	0.44824266	6.73E-01	0.39981574	0.32282624	0.5945066	32	0.028217687	0.023736961	0.033664399	6.284952658575090E-04	0.9799993	8.88888E-06	0.0200007	0.11405469	gene645	rud_dec_c18149
647	AS_rud_dec_c8136	0.25603184	5.24E-01	0.67231244	0.062824845	0.1936744	32	0.038793651	0.008444444	0.015278912	4.172677260498850E-04	0.9837026	8.92247E-06	0.0162974	0.1497052	gene647	AS_rud_dec_c8136	hypothetical protein DAPPUDRAFT_305161 [Daphnia pulex]		taeniopygia guttata eukaryotic translation initiation factor 3 subunit 3 gamma-like mrna	eif3h_taegu ame: full=eukaryotic translation initiation factor 3 subunit h short=eif3h ame: full=eukaryotic translation initiation factor 3 subunit 3 ame: full=eif-3-gamma ame: full=eif3 p40 subunit	P:translational initiation, P:translation, C:cytoplasm, F:translation initiation factor activity, C:eukaryotic translation initiation factor 3 complex, F:protein binding	sp|B5FY35|EIF3H_TAEGU	ENSDARP00000104169	ENSP00000394044	ENSXETP00000016127	ENSGACP00000008328	ENSORLP00000006901	ENSDARP00000052433	ENSTRUP00000018353	ENSTNIP00000022305	ENSBTAP00000018645	ENSMUSP00000022925	FBpp0078667	ENSCSAVP00000005998					ENST00000411422	2.00E-32	ENSXETT00000016127	5.00E-13	ENSGACT00000008347	2.00E-18	ENSORLT00000006904	5.00E-18	ENSDART00000044634	2.00E-26
648	newAS_rud_dec_rep_c40399	0.7184367	8.33E-01	0.7914949	0.53687817	0.26690874	32	0.042929705	0.03339229	0.019197279	4.050013678806860E-04	0.9839439	8.92466E-06	0.0160561	0.153634019	gene648	newAS_rud_dec_rep_c40399			ruditapes philippinarum srp54 intron isolate ai16
649	AS_rud_dec_c11411	6.23E-04	2.78E-02	0.002068792	0.40551394	0.002850894	32	0.001759637	0.027755102	0.000907029	5.498283911301760E-01	0.4583878	4.15771E-06	0.5416122	0.662765462	gene649	AS_rud_dec_c11411	hypothetical protein BRAFLDRAFT_261238 [Branchiostoma floridae]	F:binding		no40_macfa ame: full=nucleolar protein of 40 kda short=pno40 ame: full= s1 rna-binding domain protein short=ps1d protein ame: full=zinc finger cchc domain-containing protein 17	F:metal ion binding, F:nucleic acid binding, C:ribonucleoprotein complex, F:zinc ion binding, C:nucleolus, C:nucleus	sp|Q9ESX4|NO40_MOUSE	ENSDARP00000109401	ENSP00000362819	ENSXETP00000028271	ENSGACP00000007458	ENSORLP00000014487	ENSDARP00000088874	ENSTRUP00000033728	ENSTNIP00000020103	ENSBTAP00000022373	ENSMUSP00000101617
650	new_rud_dec2_c1724	0.009661595	1.10E-01	0.011344508	0.9186206	0.12456869	32	0.003927438	0.047170068	0.011478458	5.762876899218550E-01	0.4477711	4.06142E-06	0.5522289	0.672026845	gene650	new_rud_dec2_c1724			venerupis decussatus epic-pcr fragment clone c11
651	rud_dec_c34480	0.2811163	5.46E-01	0.31297243	0.8591796	0.21483536	32	0.02414059	0.045106576	0.016394558	7.447232530921610E-05	0.9931146	9.00784E-06	0.0068854	0.343428797	gene651	rud_dec_c34480	e lysozyme			lys_bpt4 ame: full=lysozyme ame: full=endolysin ame: full=lysis protein ame: full=muramidase	F:hydrolase activity, P:cell wall macromolecule catabolic process, P:cytolysis, F:catalytic activity, P:defense response to bacterium, P:peptidoglycan catabolic process, P:metabolic process, F:lysozyme activity, F:hydrolase activity. acting on glycosyl bonds	sp|P00720|LYS_BPT4
652	rud_dec_c13953	0.65757596	7.99E-01	0.8627103	0.94886845	0.284589	32	0.045492063	0.048276644	0.019931973	5.110830700800760E-04	0.9819636	8.9067E-06	0.0180364	0.132897886	gene652	rud_dec_c13953			cyclina sinensis clone cs39 microsatellite sequence
654	AS_rud_dec2_rep_c3441	6.98E-04	2.90E-02	0.04963215	6.90074E-05	0.06957123	32	0.008594104	0.000136054	0.008104308	3.906846702959680E+00	0.04808975	4.36188E-07	0.95191025	0.971745387	gene654	AS_rud_dec2_rep_c3441	h3 family 3a	C:nucleosome, F:DNA binding, P:nucleosome assembly, C:nucleus	venerupis philippinarum clone replacement histone complete cds	h331_caeel ame: full=histone type 1		sp|Q6P823|H33_XENTR	ENSDARP00000047268	ENSP00000355778	ENSXETP00000027509	ENSGACP00000011861	ENSORLP00000010883	ENSDARP00000047268	ENSTRUP00000039814	ENSTNIP00000014465	ENSBTAP00000034581	ENSMUSP00000125104	FBpp0071281	ENSCSAVP00000015809	F45E1.6.1	ENSCINP00000005615	ENSBTAT00000034695	3.00E-56	ENST00000254810	7.00E-60	ENSXETT00000027509	4.00E-67	ENSGACT00000011885	5.00E-66	ENSORLT00000009630	4.00E-59	ENSDART00000145937	7.00E-61
655	newAS_rud_dec_c25960	0.28859118	5.54E-01	0.989102	0.15990226	0.112696305	32	0.04968254	0.015151927	0.010820862	9.891650892086540E-04	0.9749099	8.84272E-06	0.0250901	0.081776515	gene655	newAS_rud_dec_c25960			venerupis decussatus epic-pcr fragment clone c11
656	AS_rud_dec_c30590	0.7260643	8.38E-01	0.98705316	0.33382973	0.42854348	32	0.049609977	0.024303855	0.026566893	5.843721924065900E-04	0.980714	8.89537E-06	0.019286	0.121271864	gene656	AS_rud_dec_c30590	hypothetical protein DAPPUDRAFT_314347 [Daphnia pulex]		ciona intestinalis trehalase mrna	trea_mouse ame: full=trehalase ame: full= -trehalase ame: full= -trehalose glucohydrolase flags: precursor	C:membrane, F:hydrolase activity, P:organ morphogenesis	sp|Q9JLT2|TREA_MOUSE	ENSDARP00000098710	ENSP00000381020		ENSGACP00000016206	ENSORLP00000003131	ENSDARP00000098710	ENSTRUP00000030386	ENSTNIP00000019390	ENSBTAP00000021565	ENSMUSP00000120671	FBpp0071469	ENSCSAVP00000013973	T05A12.2	ENSCINP00000004352
658	newAS_rud_dec_c37803	0.9728067	9.82E-01	0.8117198	0.7377755	0.89779466	32	0.043709751	0.040984127	0.045945578	1.038417814925190E-03	0.974293	8.83712E-06	0.025707	0.078647866	gene658	newAS_rud_dec_c37803
659	new_rud_dec_c28501	0.37345824	6.22E-01	0.5384134	0.17236528	0.7609011	32	0.033931973	0.01585034	0.040226757	2.107647285907880E-02	0.8845708	8.02332E-06	0.1154292	0.177904932	gene659	new_rud_dec_c28501			takifugu rubripes clone complete sequence																				ENST00000438471	1.00E-13	ENSXETT00000019608	5.00E-10					ENSDART00000136333	5.00E-07
660	AS_rud_dec_c1917	0.036547616	2.09E-01	0.023743205	0.5393599	0.0728591	32	0.005727891	0.033505669	0.008344671	1.485594743354730E+00	0.2229012	2.02178E-06	0.7770988	0.855398449	gene660	AS_rud_dec_c1917	hypothetical protein DAPPUDRAFT_306977 [Daphnia pulex]		Branchiostoma floridae hypothetical protein. mRNA	bup1_human ame: full=beta-ureidopropionase ame: full=bup-1 ame: full=beta-alanine synthase ame: full=n-carbamoyl-beta-alanine amidohydrolase	P:nitrogen compound metabolic process, C:cytosol, F:metal ion binding, F:betaureidopropionase activity	sp|Q9UBR1|BUP1_HUMAN	ENSDARP00000002199	ENSP00000406057	ENSXETP00000009191	ENSGACP00000017716	ENSORLP00000019749	ENSDARP00000002199	ENSTRUP00000039274	ENSTNIP00000014387	ENSBTAP00000001749	ENSMUSP00000049342	FBpp0081276	ENSCSAVP00000017091	F13H8.7.2	ENSCINP00000011774	ENSBTAT00000001749	4.00E-35			ENSXETT00000009191	3.00E-36	ENSGACT00000017751	4.00E-48	ENSORLT00000019750	8.00E-62	ENSDART00000133989	1.00E-44
661	newAS_rud_dec_c37449	0.29621997	5.60E-01	0.7434385	0.09369244	0.9072121	32	0.041151927	0.01078458	0.04630839	2.556762017355820E-01	0.6131063	5.56105E-06	0.3868937	0.511174548	gene661	newAS_rud_dec_c37449			af108927mercenaria mercenaria microsatellite mme299 sequence
663	rud_dec2_c238	0.7271854	8.39E-01	0.8826433	0.39046997	0.70297605	32	0.046104308	0.027052154	0.037927438	9.125078586862400E-04	0.9759014	8.85171E-06	0.0240986	0.086583725	gene663	rud_dec2_c238	pancreatic lipase-related protein	P:lipid metabolic process, F:hydrolase activity, F:catalytic activity, F:triglyceride lipase activity		lipr3_human ame: full=pancreatic lipase-related protein 3 short=pl-rp3 flags: precursor	F:hydrolase activity, F:triglyceride lipase activity, P:lipid catabolic process, C:extracellular region	sp|Q17RR3|LIPR3_HUMAN	ENSDARP00000089620	ENSP00000358232	ENSXETP00000002006	ENSGACP00000006145	ENSORLP00000010801	ENSDARP00000089620	ENSTRUP00000042661	ENSTNIP00000012199	ENSBTAP00000001012	ENSMUSP00000045465	FBpp0070831	ENSCSAVP00000013094		ENSCINP00000014633
665	rud_dec_c3592	0.2166321	4.86E-01	0.11639251	0.096142836	0.5874851	32	0.013455782	0.010947846	0.033405896	1.147832863807700E-03	0.9729731	8.82515E-06	0.0270269	0.072645091	gene665	rud_dec_c3592	headcase protein homolog			hdc_human ame: full=headcase protein homolog short=hhdc	P:respiratory tube development	sp|Q9UBI9|HDC_HUMAN	ENSDARP00000062934	ENSP00000356630	ENSXETP00000025526	ENSGACP00000010039	ENSORLP00000022207	ENSDARP00000062934	ENSTRUP00000034034	ENSTNIP00000001659	ENSBTAP00000034160	ENSMUSP00000040707	FBpp0084983	ENSCSAVP00000006633
666	newAS_rud_dec_c32806	0.6663737	8.03E-01	0.96724397	0.275509	0.40659374	32	0.048952381	0.021469388	0.025664399	3.255412150417660E-02	0.8568169	7.77158E-06	0.1431831	0.216800455	gene666	newAS_rud_dec_c32806			crassostrea gigas clone complete sequence
667	AS_rud_dec_c15625	0.14254123	3.99E-01	0.9612492	0.110101454	0.28184733	32	0.048752834	0.011909297	0.01984127	7.115755631819520E-01	0.3989213	3.61833E-06	0.6010787	0.715208388	gene667	AS_rud_dec_c15625	rna terminal phosphate cyclase-like 1		apis mellifera probable rna 3 -terminal phosphate cyclase-like mrna	rcl1_mouse ame: full=rna 3 -terminal phosphate cyclase-like protein	C:nucleolus, P:rRNA processing, F:RNA3'phosphate cyclase activity	sp|Q9JJT0|RCL1_MOUSE	ENSDARP00000055877	ENSP00000371169	ENSXETP00000001308	ENSGACP00000023096	ENSORLP00000013085	ENSDARP00000055877	ENSTRUP00000026468	ENSTNIP00000016197	ENSBTAP00000024840	ENSMUSP00000067579	FBpp0073651		ZK1127.5.2		ENSBTAT00000024840	2.00E-10	ENST00000381750	1.00E-15	ENSXETT00000001308	5.00E-18			ENSORLT00000013086	2.00E-15
668	rud_dec_c10547	0.8746005	9.23E-01	0.51764566	0.93772286	0.5254471	32	0.033043084	0.04785941	0.030897959	1.284363484273850E-03	0.9714115	8.81099E-06	0.0285885	0.066793352	gene668	rud_dec_c10547	hypothetical protein NECHADRAFT_37407 [Nectria haematococca mpVI 77-13-4]	F:oxidoreductase activity, F:catalytic activity, F:FAD binding		y8969_dicdi ame: full=fad-linked oxidoreductase ddb_g0289697		sp|P93479|RETO_PAPSO
669	rud_dec_rep_c41662	0.3318427	5.88E-01	0.6297801	0.5426558	0.15648289	32	0.03738322	0.03369161	0.013333333	5.533710387339850E-04	0.9812324	8.90007E-06	0.0187676	0.126066578	gene669	rud_dec_rep_c41662	histone variant	C:nucleosome, F:DNA binding, P:nucleosome assembly, C:nucleus	Trichoplax adhaerens conserved hypothetical protein. mRNA	h2av_strpu ame: full=histone ame: full= z	C:nucleosome, F:DNA binding, P:nucleosome assembly, C:nucleus	sp|P08991|H2AV_STRPU	ENSDARP00000062323	ENSP00000296417	ENSXETP00000002709	ENSGACP00000001130	ENSORLP00000015256	ENSDARP00000090434	ENSTRUP00000003936	ENSTNIP00000005766	ENSBTAP00000022576	ENSMUSP00000036907	FBpp0084434	ENSCSAVP00000015497	R08C7.3.3		ENSBTAT00000022576	8.00E-33	ENST00000421098	5.00E-31	ENSXETT00000002709	1.00E-30	ENSGACT00000019337	9.00E-32	ENSORLT00000015257	8.00E-19	ENSDART00000099660	7.00E-43
670	rud_dec_c40877	0.533309	7.29E-01	0.82866085	0.50234556	0.31605873	32	0.04430839	0.031891156	0.021401361	2.143010784720900E-04	0.9883202	8.96436E-06	0.0116798	0.223518117	gene670	rud_dec_c40877
672	AS_rud_dec_c21658	0.45905337	6.81E-01	0.45924652	0.2631414	0.5078149	32	0.030689342	0.020811791	0.030090703	3.934664613882430E-02	0.8427635	7.64411E-06	0.1572365	0.235619622	gene672	AS_rud_dec_c21658	rhodopsin kinase	P:biological regulation, P:phosphorylation, F:protein serine/threonine kinase activity, F:nucleotide binding	meleagris gallopavo beta-adrenergic receptor kinase 2-like mrna	gprk1_drome ame: full=g protein-coupled receptor kinase 1		sp|P32865|GPRK1_DROME	ENSDARP00000007164	ENSP00000434126	ENSXETP00000001073	ENSGACP00000017727	ENSORLP00000020234	ENSDARP00000007164	ENSTRUP00000047668	ENSTNIP00000016581	ENSBTAP00000050806	ENSMUSP00000126930	FBpp0110413	ENSCSAVP00000003176	W02B3.2		ENSBTAT00000000005	7.00E-35	ENST00000455558	8.00E-37	ENSXETT00000065716	9.00E-46	ENSGACT00000013407	2.00E-15	ENSORLT00000008184	3.00E-13	ENSDART00000022369	3.00E-30
673	rud_dec_c11065	0.24352193	5.13E-01	0.19226892	0.20850691	0.9316167	32	0.017823129	0.017909297	0.047210884	1.666441124825720E-04	0.9897003	8.97687E-06	0.0102997	0.252858782	gene673	rud_dec_c11065	predicted protein [Nematostella vectensis]		saccoglossus kowalevskii miscrna	cc146_rat ame: full=coiled-coil domain-containing protein 146		sp|Q66H60|CC146_RAT	ENSDARP00000109536	ENSP00000285871	ENSXETP00000028426	ENSGACP00000024915	ENSORLP00000022741	ENSDARP00000007809	ENSTRUP00000042785	ENSTNIP00000021669	ENSBTAP00000044467	ENSMUSP00000110900		ENSCSAVP00000013793							ENSXETT00000042726	4.00E-10
674	AS_rud_dec_c32624	0.63635755	7.87E-01	0.99272984	0.24917547	0.88994724	32	0.049773243	0.020022676	0.045578231	8.931501864140040E-04	0.9761583	8.85404E-06	0.0238417	0.088219892	gene674	AS_rud_dec_c32624	hypothetical protein BRAFLDRAFT_121069 [Branchiostoma floridae]			pkhm2_mouse ame: full=pleckstrin homology domain-containing family m member 2 short=ph domain-containing family m member 2		sp|Q80TQ5|PKHM2_MOUSE	ENSDARP00000098756	ENSP00000407163	ENSXETP00000029372	ENSGACP00000006955		ENSDARP00000098756	ENSTRUP00000009884	ENSTNIP00000013830	ENSBTAP00000024919	ENSMUSP00000081221
675	rud_dec_c17966	0.4600994	6.81E-01	0.8589805	0.48235574	0.2658153	32	0.045378685	0.031079365	0.019115646	6.326599045110010E-04	0.9799331	8.88828E-06	0.0200669	0.113376442	gene675	rud_dec_c17966	beta 6	P:cellmatrix adhesion, P:integrinmediated signaling pathway, F:binding, F:receptor activity, C:integral to membrane, P:cell adhesion, C:membrane, C:integrin complex		itb6_bovin ame: full=integrin beta-6 flags: precursor	P:inflammatory response, P:integrinmediated signaling pathway, C:integral to membrane, C:membrane, P:interspecies interaction between organisms, F:integrin binding, F:receptor activity, P:cellmatrix adhesion, C:integrin complex, P:cell adhesion, F:binding	sp|Q8SQB8|ITB6_BOVIN	ENSDARP00000074455	ENSP00000386367	ENSXETP00000027724	ENSGACP00000001991	ENSORLP00000025782	ENSDARP00000092532	ENSTRUP00000038446	ENSTNIP00000009492	ENSBTAP00000011972	ENSMUSP00000117815	FBpp0080990	ENSCSAVP00000005943	ZK1058.2	ENSCINP00000013142
676	rud_dec_c10860	0.80176693	8.83E-01	0.42968795	0.8256412	0.7755801	32	0.029378685	0.043981859	0.040852608	1.766420936121440E-03	0.9664757	8.76622E-06	0.0335243	0.056922113	gene676	rud_dec_c10860	c1q domain containing protein 1q7
680	rud_dec_c19906	0.73050904	8.40E-01	0.5613934	0.4480985	0.6953409	32	0.034820862	0.029555556	0.037569161	1.325620413012980E-03	0.9709562	8.80686E-06	0.0290438	0.065712194	gene680	rud_dec_c19906	loc797088 protein		Xenopus tropicalis hypothetical protein LOC100135276. mRNA (cDNA clone IMAGE:7876115). partial cds	psmd4_mouse ame: full=26s proteasome non-atpase regulatory subunit 4 ame: full=26s proteasome regulatory subunit rpn10 ame: full=26s proteasome regulatory subunit s5a ame: full=multiubiquitin chain-binding protein	C:cytoplasm	sp|O35226|PSMD4_MOUSE	ENSDARP00000094838	ENSP00000414499	ENSXETP00000043319	ENSGACP00000016175	ENSORLP00000000389	ENSDARP00000003266	ENSTRUP00000004856	ENSTNIP00000021511	ENSBTAP00000043651	ENSMUSP00000113554	FBpp0078024	ENSCSAVP00000007894	B0205.3.1	ENSCINP00000021833							ENSGACT00000016206	1.00E-16	ENSORLT00000011955	4.00E-15	ENSDART00000104063	5.00E-24
681	AS_rud_dec_c8865	1.70E-05	4.82E-03	1.3845E-06	0.95251644	0.28747168	32	6.80272E-05	0.048421769	0.020054422	3.563993977735430E-02	0.850261	7.71212E-06	0.149739	0.225611399	gene681	AS_rud_dec_c8865	PREDICTED: predicted protein-like [Saccoglossus kowalevskii]			rg9d3_bovin ame: full=rna (guanine-9-)-methyltransferase domain-containing protein 3	F:methyltransferase activity, F:transferase activity	sp|Q08DP1|RG9D3_BOVIN	ENSDARP00000078938	ENSP00000297994	ENSXETP00000020205	ENSGACP00000025226	ENSORLP00000009856	ENSDARP00000078938	ENSTRUP00000046305	ENSTNIP00000005833	ENSBTAP00000025180	ENSMUSP00000103429	FBpp0077043	ENSCSAVP00000001271	F25H8.1b	ENSCINP00000014945
682	rud_dec_c24671	0.6454896	7.93E-01	0.5360577	0.5476022	0.5474096	32	0.033809524	0.033922902	0.0318322	3.925833109974510E-04	0.984192	8.92691E-06	0.015808	0.157693741	gene682	rud_dec_c24671			takifugu rubripes claudin 29a complete cds				ENSDARP00000025766			ENSGACP00000027111	ENSORLP00000003653		ENSTRUP00000024787	ENSTNIP00000019203													ENSGACT00000027163	2.00E-28	ENSORLT00000003654	7.00E-20
684	rud_dec_c14447	0.44157124	6.69E-01	0.37305602	0.16070205	0.9140103	32	0.02706576	0.015201814	0.046575964	1.063509677692300E-03	0.9739844	8.83433E-06	0.0260156	0.077254838	gene684	rud_dec_c14447	sdccag1 protein		strongylocentrotus purpuratus serologically defined colon cancer antigen 1 mrna	nemf_human ame: full=nuclear export mediator factor nemf ame: full=antigen ny-co-1 ame: full=serologically defined colon cancer antigen 1	C:nucleus, C:cytoplasm	sp|O60524|SDCG1_HUMAN		ENSP00000371570	ENSXETP00000057721	ENSGACP00000014034			ENSTRUP00000033041	ENSTNIP00000020388	ENSBTAP00000006491	ENSMUSP00000021368	FBpp0290493	ENSCSAVP00000002022	Y82E9BR.18.1	ENSCINP00000001692	ENSBTAT00000006491	3.00E-10	ENST00000382135	2.00E-08	ENSXETT00000020018	3.00E-16	ENSGACT00000014059	4.00E-08
685	rud_dec_rep_c20073	0.3961123	6.40E-01	0.5626899	0.14905538	0.6710302	32	0.034879819	0.01445805	0.03662585	9.845299608256250E-01	0.321083	2.91232E-06	0.678917	0.778255209	gene685	rud_dec_rep_c20073			spisula solidissima gene for zinc finger protein sso- complete cds
687	rud_dec_c15807	0.3017373	5.63E-01	0.532112	0.4651021	0.16991441	32	0.033641723	0.030403628	0.014095238	1.944996630350030E-01	0.6591977	5.97912E-06	0.3408023	0.462301717	gene687	rud_dec_c15807	hypothetical protein BRAFLDRAFT_120046 [Branchiostoma floridae]		ciona intestinalis protein mrna	fa47e_human ame: full=protein fam47e		sp|Q6ZV65|FA47E_HUMAN	ENSDARP00000088270	ENSP00000409423		ENSGACP00000010463		ENSDARP00000088270	ENSTRUP00000040342		ENSBTAP00000048938	ENSMUSP00000097534		ENSCSAVP00000017753		ENSCINP00000021898					ENSXETT00000062373	9.00E-08
688	AS_rud_dec2_c250	0.42565665	6.60E-01	0.3685172	0.9602547	0.14850095	32	0.026866213	0.048702948	0.01293424	2.940377444247130E-04	0.9863189	8.9462E-06	0.0136811	0.188744387	gene688	AS_rud_dec2_c250	unnamed protein product [Homo sapiens]	C:cytosol, F:protein binding, C:plasma membrane		flnc_human ame: full=filamin-c short=fln-c short=flnc ame: full=abp-280-like protein ame: full=abp-l ame: full=actin-binding-like protein ame: full=filamin-2 ame: full=gamma-filamin	C:cytosol, F:protein binding, C:plasma membrane	sp|Q8VHX6|FLNC_MOUSE	ENSDARP00000117334	ENSP00000344002	ENSXETP00000032779	ENSGACP00000000834	ENSORLP00000002469	ENSDARP00000024947	ENSTRUP00000004609	ENSTNIP00000008895	ENSBTAP00000008207	ENSMUSP00000087958	FBpp0088478	ENSCSAVP00000017580	Y66H1B.2c.1	ENSCINP00000006748
689	rud_dec_c41645	0.08675209	3.17E-01	0.04245402	0.08232288	0.07259973	32	0.007882086	0.009941043	0.008331066	1.055669527659110E-03	0.9740804	8.8352E-06	0.0259196	0.077681281	gene689	rud_dec_c41645	member of ras oncogene family-like 4						ENSDARP00000053179					ENSDARP00000053179	ENSTRUP00000000038		ENSBTAP00000037810			ENSCSAVP00000006254
691	rud_dec_c16666	0.19541328	4.65E-01	0.08891544	0.85615045	0.09646675	32	0.011605442	0.045011338	0.00985941	7.138981538901130E-05	0.9932586	9.00915E-06	0.0067414	0.353859296	gene691	rud_dec_c16666	hypothetical protein CHGG_10233 [Chaetomium globosum CBS 148.51]	F:actin binding, C:intracellular		actp_acaca ame: full=actophorin	C:cytoplasm, F:actin binding, C:intracellular	sp|P37167|ACTP_ACACA	ENSDARP00000006420	ENSP00000309629	ENSXETP00000026893	ENSGACP00000022501	ENSORLP00000012943	ENSDARP00000006420	ENSTRUP00000031388	ENSTNIP00000019932	ENSBTAP00000020036	ENSMUSP00000112259	FBpp0072097		C38C3.5c.2
692	rud_dec_c40638	0.34614828	5.99E-01	0.33770925	0.1310909	0.981254	32	0.025333333	0.013414966	0.049283447	1.726381526916610E-01	0.6777778	6.14764E-06	0.3222222	0.441663182	gene692	rud_dec_c40638	calcium calmodulin-dependent serine protein kinase membrane-associated guanylate	F:kinase activity	ornithorhynchus anatinus calcium calmodulin-dependent serine protein kinase (maguk family) mrna	cskp_mouse ame: full=peripheral plasma membrane protein cask ame: full=calcium calmodulin-dependent serine protein kinase		sp|O70589|CSKP_MOUSE	ENSDARP00000040842	ENSP00000354641	ENSXETP00000010527	ENSGACP00000010886	ENSORLP00000017137	ENSDARP00000040842	ENSTRUP00000029463	ENSTNIP00000017568	ENSBTAP00000026825	ENSMUSP00000111091	FBpp0290542	ENSCSAVP00000017938	F17E5.1b	ENSCINP00000004802			ENST00000361962	4.00E-27	ENSXETT00000034012	4.00E-06	ENSGACT00000010909	2.00E-22	ENSORLT00000017138	1.00E-37	ENSDART00000138844	3.00E-30
693	rud_dec_c17762	0.08524175	3.15E-01	0.13196863	0.10337274	0.41454884	32	0.014390023	0.011496599	0.025972789	4.049695185351870E+00	0.04417932	4.00719E-07	0.95582068	0.974473858	gene693	rud_dec_c17762	hypothetical protein BRAFLDRAFT_81994 [Branchiostoma floridae]	P:rRNA processing, C:ribonucleoprotein complex, C:nucleus		mpp10_human ame: full=u3 small nucleolar ribonucleoprotein protein mpp10 ame: full=m phase phosphoprotein 10	C:nucleolus, P:RNA splicing, F:protein binding	sp|O00566|MPP10_HUMAN		ENSP00000393034	ENSXETP00000035981	ENSGACP00000020423	ENSORLP00000007347		ENSTRUP00000044231		ENSBTAP00000047872	ENSMUSP00000095995
697	AS_rud_dec_c18046	0.7539283	8.53E-01	0.72051966	0.89771456	0.38911164	32	0.040321995	0.046512472	0.024825397	1.760124449390330E-03	0.9665355	8.76676E-06	0.0334645	0.056960961	gene697	AS_rud_dec_c18046
698	AS_rud_dec_c13133	0.10941292	3.54E-01	0.042211633	0.07826642	0.18766887	32	0.007854875	0.009655329	0.015006803	7.298596592590910E-04	0.978447	8.8748E-06	0.021553	0.103071028	gene698	AS_rud_dec_c13133	hypothetical protein BRAFLDRAFT_94659 [Branchiostoma floridae]
699	rud_dec_c37157	0.101825364	3.44E-01	0.51758564	0.15284301	0.1884988	32	0.033038549	0.014712018	0.015034014	1.071675846975490E-02	0.9175489	8.32244E-06	0.0824511	0.130022672	gene699	rud_dec_c37157	hypothetical protein BRAFLDRAFT_70294 [Branchiostoma floridae]	F:receptor activity, C:integral to membrane, P:multicellular organismal development, C:membrane, P:signal transduction, C:intracellular							ENSXETP00000016825
700	rud_dec_c17965	0.2200821	4.89E-01	0.1728798	0.27611166	0.46778533	32	0.01675737	0.021496599	0.028244898	9.655929369496330E-01	0.3257818	2.95494E-06	0.6742182	0.774721903	gene700	rud_dec_c17965	octopine dehydrogenase	P:metabolic process, F:binding, F:catalytic activity	pseudocardium sachalinensis odh mrna for octopine complete cds	y4xo_rhisn ame: full=uncharacterized protein y4xo	P:oxidation reduction, F:binding, F:oxidoreductase activity, P:metabolic process, F:catalytic activity, F:coenzyme binding	sp|P55707|Y4XO_RHISN
701	rud_dec_c1689	0.54409355	7.35E-01	0.24960811	0.50382215	0.8141205	32	0.020843537	0.031981859	0.042548753	1.653101612532730E-03	0.9675683	8.77613E-06	0.0324317	0.05780961	gene701	rud_dec_c1689	hypothetical protein BRAFLDRAFT_67947 [Branchiostoma floridae]	F:receptor activity, C:integral to membrane, F:Gprotein coupled receptor activity, F:signal transducer activity, P:signal transduction, F:protein binding, P:Gprotein coupled receptor protein signaling pathway		cln5a_dicdi ame: full=cln5-like protein 1 flags: precursor		sp|Q86JG6|CLN5A_DICDI	ENSDARP00000018076					ENSDARP00000018076						ENSCSAVP00000013925		ENSCINP00000018912
703	AS_rud_dec_c19668	0.6845019	8.15E-01	0.6477392	0.3134544	0.8721995	32	0.037981859	0.023396825	0.044820862	1.285634541545730E-03	0.9713974	8.81086E-06	0.0286026	0.066727293	gene703	AS_rud_dec_c19668	MyD88 [Chlamys farreri]	F:transmembrane receptor activity, P:signal transduction, F:protein binding, P:innate immune response, C:intrinsic to membrane
705	AS_rud_dec_c21400	0.036518596	2.09E-01	0.113548696	0.11362536	0.005997431	32	0.013306122	0.012195011	0.001537415	1.180728437642520E-01	0.7311341	6.6316E-06	0.2688659	0.378410217	gene705	AS_rud_dec_c21400	3-phosphoshikimate 1-carboxyvinyltransferase	C:cytoplasm, F:3phosphoshikimate 1carboxyvinyltransferase activity, P:aromatic amino acid family biosynthetic process	halorhodospira halophila complete genome	aroa_alheh ame: full=3-phosphoshikimate 1-carboxyvinyltransferase ame: full=5-enolpyruvylshikimate-3-phosphate synthase short=epsp synthase short=epsps	C:cytoplasm, F:3phosphoshikimate 1carboxyvinyltransferase activity, P:aromatic amino acid family biosynthetic process	sp|Q0AA54|AROA_ALHEH											FBpp0084084
706	rud_dec_c18478	0.77654946	8.68E-01	0.5851037	0.33912686	0.8169437	32	0.03569161	0.024575964	0.042639456	1.529215434970860E-03	0.9688065	8.78736E-06	0.0311935	0.06017605	gene706	rud_dec_c18478	wd repeat domain 52- partial		saccoglossus kowalevskii wd repeat domain 52-like partial mrna				ENSDARP00000106411		ENSXETP00000038551						ENSBTAP00000018490	ENSMUSP00000097331		ENSCSAVP00000016290		ENSCINP00000000685
707	rud_dec_c7461	4.19E-06	1.85E-03	1.66335E-06	0.004602192	0.000105744	32	7.70975E-05	0.001727891	9.52381E-05	1.755917379455240E-03	0.9665755	8.76712E-06	0.0334245	0.056980864	gene707	rud_dec_c7461	c1q domain containing protein 1q15			c1ql4_mouse ame: full=complement c1q-like protein 4 ame: full=c1q and tumor necrosis factor-related protein 11 short=c1qtnf11 flags: precursor	F:molecular_function, P:biological_process, C:cellular_component	sp|Q4ZJM9|C1QL4_MOUSE	ENSDARP00000120475	ENSP00000335285	ENSXETP00000006914	ENSGACP00000011804	ENSORLP00000009336	ENSDARP00000096302	ENSTRUP00000003096	ENSTNIP00000002540	ENSBTAP00000043534	ENSMUSP00000068402		ENSCSAVP00000004436		ENSCINP00000026022
709	rud_dec_c11386	0.002911086	6.22E-02	0.011445595	0.9503933	0.001623006	32	0.003954649	0.048353741	0.000639456	3.300661161131300E-02	0.855836	7.76268E-06	0.144164	0.218016157	gene709	rud_dec_c11386	viral a-type inclusion protein			gogc4_arath ame: full=golgin candidate 4 short= 4	F:molecular_function, C:Golgi apparatus, P:Golgi organization	sp|Q8VYU6|GOGC4_ARATH		ENSP00000355922	ENSXETP00000023785	ENSGACP00000013414					ENSBTAP00000033816	ENSMUSP00000046956
710	AS_rud_dec_rep_c13439	0.17463358	4.41E-01	0.8678253	0.26035327	0.047113474	32	0.045673469	0.020657596	0.006371882	5.027562204199730E+00	0.02494699	2.26277E-07	0.97505301	0.986598984	gene710	AS_rud_dec_rep_c13439
711	rud_dec_c7269	0.10812132	3.52E-01	0.30443567	0.084236264	0.026299298	32	0.02369161	0.010099773	0.00430839	2.039654543029880E-01	0.6515389	5.90965E-06	0.3484611	0.470317951	gene711	rud_dec_c7269											ENSORLP00000023444
712	AS_rud_dec_c17600	0.7098764	8.28E-01	0.5801751	0.29785356	0.42979804	32	0.03554195	0.022562358	0.02660771	1.059679391914860E-03	0.9740313	8.83475E-06	0.0259687	0.07753331	gene712	AS_rud_dec_c17600	hypothetical protein [Plasmodium berghei strain ANKA]	P:regulation of transcription. DNAdependent, P:transcription initiation, F:zinc ion binding, F:transcription regulator activity		ddx54_dicdi ame: full=atp-dependent rna helicase ddx54 ame: full=atp-dependent rna helicase hela ame: full=dead box protein 54		sp|Q54CD8|DDX54_DICDI		ENSP00000216832	ENSXETP00000050022						ENSBTAP00000038454		FBpp0291704			ENSCINP00000008105
713	rud_dec2_c3110	0.2375584	5.06E-01	0.5877553	0.0721734	0.54166275	32	0.035809524	0.009138322	0.031578231	2.498376417180450E-01	0.6171894	5.59809E-06	0.3828106	0.507421987	gene713	rud_dec2_c3110	conserved hypothetical protein [Talaromyces stipitatus ATCC 10500]
714	AS_rud_dec_rep_c44744	0.5405113	7.33E-01	0.5118407	0.7063793	0.36594564	32	0.032748299	0.039777778	0.023705215	3.046763399860870E-01	0.5809655	5.26953E-06	0.4190345	0.545081106	gene714	AS_rud_dec_rep_c44744	calm_metse ame: full=calmodulin short=	F:calcium ion binding	latrodectus hesperus clone cv131 calmodulin partial cds	calm_metse ame: full=calmodulin short=	F:calcium ion binding	sp|Q95NR9|CALM_METSE	ENSDARP00000065391	ENSP00000272298	ENSXETP00000000663	ENSGACP00000016673	ENSORLP00000022187	ENSDARP00000053797	ENSTRUP00000029442	ENSTNIP00000012587	ENSBTAP00000019411	ENSMUSP00000105709	FBpp0087110	ENSCSAVP00000019974	T21H3.3.2	ENSCINP00000017574	ENSBTAT00000002055	6.00E-111	ENST00000356978	2.00E-118	ENSXETT00000000663	2.00E-115	ENSGACT00000003428	5.00E-105	ENSORLT00000022188	9.00E-101	ENSDART00000014868	1.00E-109
715	rud_dec_c4087	0.5317433	7.28E-01	0.52714634	0.1561077	0.66133356	32	0.033410431	0.0149161	0.036217687	3.959534939588130E-02	0.8422739	7.63967E-06	0.1577261	0.236160663	gene715	rud_dec_c4087
716	rud_dec2_c1259	0.1513903	4.11E-01	0.58697695	0.07993296	0.46251643	32	0.035764172	0.009823129	0.028036281	4.156467098041500E-01	0.5191173	4.70855E-06	0.4808827	0.606217978	gene716	rud_dec2_c1259	PREDICTED: similar to predicted protein [Tribolium castaneum]		saccoglossus kowalevskii proteasome beta 9 subunit isoform 1 pro transcript variant 1 mrna	psb6_bovin ame: full=proteasome subunit beta type-6 flags: precursor	C:cytoplasm, C:proteasome core complex, C:nucleus, F:threoninetype endopeptidase activity, P:proteolysis involved in cellular protein catabolic process	sp|Q3MHN0|PSB6_BOVIN	ENSDARP00000025226	ENSP00000270586	ENSXETP00000055097	ENSGACP00000001492	ENSORLP00000003446	ENSDARP00000025226	ENSTRUP00000003687	ENSTNIP00000021348	ENSBTAP00000017816	ENSMUSP00000018430	FBpp0086400	ENSCSAVP00000016602	K08D12.1.2	ENSCINP00000009362	ENSBTAT00000017816	4.00E-12	ENST00000270586	7.00E-17			ENSGACT00000001493	1.00E-11			ENSDART00000024082	3.00E-22
717	rud_dec_rep_c24261	0.037314683	2.11E-01	0.034485906	0.30579242	0.010462065	32	0.007151927	0.023002268	0.002285714	1.386530931085870E-03	0.9702967	8.80088E-06	0.0297033	0.063650753	gene717	rud_dec_rep_c24261	activating transcription factor 4	F:DNA binding		atfc_bommo ame: full=activating transcription factor of chaperone	F:binding	sp|Q9GPH3|ATFC_BOMMO	ENSDARP00000055608	ENSP00000379912	ENSXETP00000050104	ENSGACP00000010811	ENSORLP00000013351	ENSDARP00000055608	ENSTRUP00000004366	ENSTNIP00000014442	ENSBTAP00000023213	ENSMUSP00000105234	FBpp0081041	ENSCSAVP00000013910	T04C10.4	ENSCINP00000022333
718	rud_dec_c2022	0.36337256	6.14E-01	0.7495525	0.8883363	0.10848121	32	0.041451247	0.04615873	0.010575964	8.141145364106700E-04	0.9772373	8.86383E-06	0.0227627	0.095151021	gene718	rud_dec_c2022	PREDICTED: hypothetical protein [Saccoglossus kowalevskii]			f161a_xenla ame: full=protein fam161a		sp|Q66KE9|F161A_XENLA			ENSXETP00000004758		ENSORLP00000001893				ENSBTAP00000012239
719	rud_dec2_c575	0.30673972	5.67E-01	0.10873543	0.82350636	0.17760698	32	0.012965986	0.043909297	0.014557823	9.079808795604540E-04	0.9759612	8.85226E-06	0.0240388	0.087135709	gene719	rud_dec2_c575	hypothetical protein BRAFLDRAFT_124448 [Branchiostoma floridae]	C:cytoplasm, C:proteasome core complex, C:nucleus, F:threoninetype endopeptidase activity, P:proteolysis involved in cellular protein catabolic process	taeniopygia guttata clone 0058p0039c10 proteasome subunit beta type 1 complete cds	psb1b_carau ame: full=proteasome subunit beta type-1-b ame: full=20s proteasome beta-6 subunit b short=b6-b	C:cytoplasm, C:proteasome core complex, C:nucleus, F:threoninetype endopeptidase activity, P:proteolysis involved in cellular protein catabolic process	sp|Q9IB83|PSB1B_CARAU	ENSDARP00000011778	ENSP00000262193	ENSXETP00000018726	ENSGACP00000021315	ENSORLP00000013552	ENSDARP00000011778	ENSTRUP00000018371	ENSTNIP00000020833	ENSBTAP00000010108	ENSMUSP00000014913	FBpp0075119	ENSCSAVP00000016602	C02F5.9.1	ENSCINP00000019473	ENSBTAT00000010108	2.00E-54	ENST00000462957	2.00E-49	ENSXETT00000018726	3.00E-33	ENSGACT00000021356	8.00E-59	ENSORLT00000013553	3.00E-63	ENSDART00000007231	7.00E-38
720	new_rud_dec_rep_c20437	0.16451351	4.27E-01	0.17647807	0.08115313	0.8996794	32	0.016943311	0.009868481	0.04600907	1.154117495627810E-02	0.914448	8.29431E-06	0.085552	0.134566167	gene720	new_rud_dec_rep_c20437			ruditapes philippinarum srp54 intron isolate ai16
721	rud_dec_c9266	0.2505832	5.18E-01	0.47651777	0.060189996	0.88058686	32	0.031324263	0.008226757	0.045256236	3.205586484682490E-04	0.9857153	8.94073E-06	0.0142847	0.182456834	gene721	rud_dec_c9266	trna aspartic acid methyltransferase 1		rattus norvegicus trna aspartic acid methyltransferase 1 mrna	trdmt_human ame: full=trna (cytosine -c )-methyltransferase ame: full=dna (cytosine-5)-methyltransferase-like protein 2 short=dnmt2 ame: full=dna methyltransferase homolog short=dna mtase homolog short= ame: full= et	F:methyltransferase activity	sp|O14717|TRDMT_HUMAN	ENSDARP00000048632	ENSP00000419625	ENSXETP00000057609	ENSGACP00000019517	ENSORLP00000024161	ENSDARP00000048632		ENSTNIP00000002735	ENSBTAP00000027378	ENSMUSP00000114572	FBpp0110211				ENSBTAT00000027380	1.00E-06
724	rud_dec_c18236	0.21643855	4.86E-01	0.056176227	0.22106099	0.29152396	32	0.009219955	0.018594104	0.020213152	1.371443705596100E-01	0.7111366	6.45022E-06	0.2888634	0.402749969	gene724	rud_dec_c18236			strongylocentrotus purpuratus aconitase 1 mrna			sp|Q23500|ACOC_CAEEL	ENSDARP00000045252	ENSP00000369255	ENSXETP00000020189	ENSGACP00000002197	ENSORLP00000025589	ENSDARP00000013136	ENSTRUP00000016904	ENSTNIP00000007967	ENSBTAP00000000731	ENSMUSP00000030112	FBpp0083720	ENSCSAVP00000019947	ZK455.1.1		ENSBTAT00000000731	3.00E-14	ENST00000432017	5.00E-07	ENSXETT00000020189	7.00E-22	ENSGACT00000002203	2.00E-15	ENSORLT00000025591	1.00E-12	ENSDART00000045253	4.00E-16
725	rud_dec2_c879	0.3344729	5.89E-01	0.67380804	0.7821838	0.15040815	32	0.038852608	0.042544218	0.013020408	1.261095027871300E-03	0.9716716	8.81335E-06	0.0283284	0.067604233	gene725	rud_dec2_c879			strongylocentrotus purpuratus nad transhydrogenase mrna			sp|Q61941|NNTM_MOUSE	ENSDARP00000032730	ENSP00000426343	ENSXETP00000036191	ENSGACP00000022224	ENSORLP00000003023	ENSDARP00000032730	ENSTRUP00000043319	ENSTNIP00000012408	ENSBTAP00000015769	ENSMUSP00000104828		ENSCSAVP00000017492		ENSCINP00000016569	ENSBTAT00000015769	2.00E-08					ENSGACT00000022888	3.00E-07	ENSORLT00000012279	9.00E-06	ENSDART00000037664	5.00E-07
726	rud_dec_c4427	0.625176	7.82E-01	0.99702466	0.22348441	0.9993866	32	0.049891156	0.018761905	0.049963719	9.691213364249050E-05	0.9921454	8.99905E-06	0.0078546	0.320671318	gene726	rud_dec_c4427
727	rud_dec_rep_c24055	0.6507093	7.96E-01	0.44691175	0.53994006	0.5593807	32	0.03014059	0.03353288	0.032290249	4.994197928454010E-04	0.9821706	8.90858E-06	0.0178294	0.134889139	gene727	rud_dec_rep_c24055			venerupis decussatus partial srp54 gene for signal recognition particle 54-kda clone exons a-b
728	rud_dec2_c1144	0.6218742	7.81E-01	0.38089082	0.5283632	0.6518252	32	0.027414966	0.032984127	0.035904762	8.677880013010500E-04	0.9764991	8.85713E-06	0.0235009	0.090261471	gene728	rud_dec2_c1144	dna repair protein xrcc2-like			xrcc2_mouse ame: full=dna repair protein xrcc2 ame: full=x-ray repair cross-complementing protein 2	P:response to gamma radiation, P:response to Xray, P:positive regulation of neurogenesis, P:doublestrand break repair via homologous recombination, P:in utero embryonic development, P:negative regulation of neuron apoptosis	sp|Q9CX47|XRCC2_MOUSE	ENSDARP00000019152	ENSP00000352271	ENSXETP00000021470	ENSGACP00000001518		ENSDARP00000019152	ENSTRUP00000044830	ENSTNIP00000009727	ENSBTAP00000041269	ENSMUSP00000030773
729	AS_rud_dec_c35281	0.3637231	6.14E-01	0.5121024	0.21421787	0.10798212	32	0.032770975	0.018226757	0.010507937	8.942748149820540E-04	0.9761433	8.85391E-06	0.0238567	0.088068454	gene729	AS_rud_dec_c35281			anoplopoma fimbria clone afim-evh-533-373 nadh dehydrogenase 1 alpha subcomplex subunit 4 complete cds																								ENSGACT00000012791	8.00E-44	ENSORLT00000003133	2.00E-13
730	rud_dec_c8624	0.39080164	6.36E-01	0.12673019	0.2781444	0.40327564	32	0.014095238	0.021632653	0.025505669	1.174295021883150E-03	0.9726635	8.82234E-06	0.0273365	0.071253308	gene730	rud_dec_c8624	PREDICTED: twitchin-like [Saccoglossus kowalevskii]		saccoglossus kowalevskii twitchin-like mrna				ENSDARP00000091646			ENSGACP00000012035	ENSORLP00000009448	ENSDARP00000091646	ENSTRUP00000037784	ENSTNIP00000001531	ENSBTAP00000053586		FBpp0086495	ENSCSAVP00000003817			ENSBTAT00000061320	8.00E-06
731	rud_dec_c10549	0.9207826	9.50E-01	0.78869873	0.50578755	0.8915084	32	0.042811791	0.032068027	0.045650794	1.495606543073790E-03	0.969151	8.79049E-06	0.030849	0.061159807	gene731	rud_dec_c10549	bchain crystal structure of yeast -cop subcomplex of the copi vesicular coat		saccoglossus kowalevskii coatomer protein complex subunit alpha- transcript variant 2 mrna	copa_human ame: full=coatomer subunit alpha ame: full=alpha-coat protein short=alpha-cop ame: full=hep-cop short=hepcop contains: ame: full=xenin ame: full=xenopsin-related peptide contains: ame: full=proxenin	P:pancreatic juice secretion, C:COPI vesicle coat, C:cytosol, C:soluble fraction, F:calcium ion binding, P:protein folding, P:retrograde vesiclemediated transport. Golgi to ER, C:extracellular space, C:microsome, P:COPI coating of Golgi vesicle, F:unfolded protein binding, P:intracellular protein transport, F:structural molecule activity, F:hormone activity, C:endoplasmic reticulum	sp|P53621|COPA_HUMAN	ENSDARP00000106765	ENSP00000241704	ENSXETP00000012848	ENSGACP00000023466	ENSORLP00000003574	ENSDARP00000104416	ENSTRUP00000025682	ENSTNIP00000007241	ENSBTAP00000005672	ENSMUSP00000073785	FBpp0072693	ENSCSAVP00000009689	Y71F9AL.17	ENSCINP00000022767	ENSBTAT00000005672	6.00E-47	ENST00000241704	1.00E-70	ENSXETT00000066185	6.00E-52	ENSGACT00000023512	1.00E-23	ENSORLT00000003575	6.00E-39	ENSDART00000130098	9.00E-54
732	rud_dec_c29759	0.6646751	8.02E-01	0.2195079	0.765068	0.60646343	32	0.019297052	0.041954649	0.034145125	1.525396504348460E-03	0.9688455	8.78771E-06	0.0311545	0.060333108	gene732	rud_dec_c29759	caveolin [Crassostrea gigas]					sp|Q8BNL5|KCTD6_MOUSE	ENSDARP00000063273	ENSP00000347188	ENSXETP00000019002	ENSGACP00000020160	ENSORLP00000012875	ENSDARP00000063273	ENSTRUP00000027788	ENSTNIP00000021060	ENSBTAP00000030686	ENSMUSP00000129059	FBpp0085430	ENSCSAVP00000005902		ENSCINP00000012994
733	rud_dec_rep_c37087	0.0165756	1.44E-01	0.032864004	0.5240115	0.003969437	32	0.006970522	0.032798186	0.001179138	4.667674436021790E-01	0.4944781	4.48506E-06	0.5055219	0.63014451	gene733	rud_dec_rep_c37087																											ENSGACT00000010922	1.00E-05
734	rud_dec_c26119	0.4944948	7.03E-01	0.1769987	0.38863564	0.85606	32	0.016970522	0.026970522	0.044122449	1.479790052144380E-03	0.9693145	8.79197E-06	0.0306855	0.061544081	gene734	rud_dec_c26119	si:ch211- protein			if44l_human ame: full=interferon-induced protein 44-like	C:cytoplasm, P:immune response	sp|Q53G44|IF44L_HUMAN	ENSDARP00000125020	ENSP00000342833		ENSGACP00000010553	ENSORLP00000010797	ENSDARP00000073096	ENSTRUP00000041124	ENSTNIP00000000999	ENSBTAP00000041329	ENSMUSP00000029671		ENSCSAVP00000018910
735	rud_dec_c35199	0.8494883	9.09E-01	0.43603766	0.62169284	0.9162433	32	0.029641723	0.036752834	0.046666667	1.651311108503250E-03	0.9675858	8.77629E-06	0.0324142	0.057843893	gene735	rud_dec_c35199	hypothetical protein BATDEDRAFT_9100 [Batrachochytrium dendrobatidis JAM81]			sywm_yeast ame: full=tryptophanyl-trna mitochondrial ame: full=tryptophan--trna ligase short=		sp|P04803|SYWM_YEAST											FBpp0074907	ENSCSAVP00000005463		ENSCINP00000027497
736	AS_rud_dec_c24372	0.6332535	7.86E-01	0.39848974	0.853669	0.517872	32	0.0281678	0.044907029	0.030580499	1.410896813467840E-03	0.970037	8.79852E-06	0.029963	0.063091146	gene736	AS_rud_dec_c24372	predicted protein [Nematostella vectensis]	F:calcium ion binding	gallus gallus calcyphosine- transcript variant 2 mrna	capsl_human ame: full=calcyphosin-like protein	C:cytoplasm, F:calcium ion binding	sp|Q8WWF8|CAPSL_HUMAN	ENSDARP00000043785	ENSP00000421018	ENSXETP00000040510	ENSGACP00000017818	ENSORLP00000024385	ENSDARP00000043785	ENSTRUP00000008508	ENSTNIP00000013287	ENSBTAP00000016852	ENSMUSP00000035663	FBpp0082155	ENSCSAVP00000018812	T07G12.1c		ENSBTAT00000016852	5.00E-25	ENST00000397366	3.00E-29	ENSXETT00000040510	9.00E-34					ENSDART00000043786	3.00E-23
738	rud_dec_c2186	0.36986697	6.19E-01	0.26915774	0.767858	0.18270954	32	0.021882086	0.042040816	0.014780045	1.059834079114800E-03	0.9740294	8.83473E-06	0.0259706	0.077517986	gene738	rud_dec_c2186	yeast sec homolog family member (sec- )-like		saccoglossus kowalevskii yeast sec homolog family member (sec- )-like mrna	sc24c_human ame: full=protein transport protein sec24c ame: full=sec24-related protein c	P:cellular membrane organization, F:protein binding, C:COPII vesicle coat, P:ER to Golgi vesiclemediated transport	sp|P53992|SC24C_HUMAN	ENSDARP00000079911	ENSP00000343405	ENSXETP00000022051	ENSGACP00000003772	ENSORLP00000013239	ENSDARP00000103835	ENSTRUP00000020301	ENSTNIP00000009158	ENSBTAP00000003616	ENSMUSP00000045955	FBpp0077487	ENSCSAVP00000015148	F12F6.6						ENSXETT00000022051	3.00E-20	ENSGACT00000003785	7.00E-09
739	AS_rud_dec_c16917	0.46600655	6.86E-01	0.49564847	0.25561783	0.7160406	32	0.032122449	0.020380952	0.03845805	5.407126011220950E-04	0.9814483	8.90203E-06	0.0185517	0.12796958	gene739	AS_rud_dec_c16917			dicentrarchus labrax chromosome sequence corresponding to linkage group top complete sequence
741	rud_dec_rep_c11247	0.1531618	4.13E-01	0.024181923	0.66993606	0.59422535	32	0.005764172	0.038521542	0.033655329	1.294757914422460E-03	0.9712961	8.80994E-06	0.0287039	0.066457276	gene741	rud_dec_rep_c11247
742	newAS_rud_dec_c9889	0.09841857	3.38E-01	0.7436839	0.037735634	0.58510476	32	0.041165533	0.006272109	0.033297052	9.252800031052850E-01	0.3360924	3.04846E-06	0.6639076	0.766630366	gene742	newAS_rud_dec_c9889
743	rud_dec_c40487	0.30742872	5.67E-01	0.15314545	0.9050102	0.17212082	32	0.015678005	0.046752834	0.014240363	1.020958981996500E-03	0.97451	8.83909E-06	0.02549	0.079529089	gene743	rud_dec_c40487	pol-like protein	F:nucleic acid binding, F:catalytic activity	zebrafish dna sequence from clone ch211-10l22 in linkage group complete sequence	yo84_caeel ame: full= uncharacterized transposon-derived protein			ENSDARP00000106282
746	rud_dec_c41329	2.26E-04	1.64E-02	0.06650381	0.01798389	0.004036119	32	0.010045351	0.003977324	0.001188209	4.926897353927300E+00	0.02644175	2.39834E-07	0.97355825	0.985629371	gene746	rud_dec_c41329	multidrug resistance-associated protein 1-like			mrp1_canfa ame: full=multidrug resistance-associated protein 1 ame: full=atp-binding cassette sub-family c member 1 ame: full=leukotriene c transporter short=ltc4 transporter	F:nucleosidetriphosphatase activity, C:membrane	sp|Q6UR05|MRP1_CANFA	ENSDARP00000042811	ENSP00000263019	ENSXETP00000026760	ENSGACP00000000568	ENSORLP00000021451	ENSDARP00000042811	ENSTRUP00000030664	ENSTNIP00000000842	ENSBTAP00000028094	ENSMUSP00000116726	FBpp0089070
747	rud_dec_c34800	0.44906637	6.74E-01	0.18108657	0.36485842	0.24028315	32	0.017188209	0.025795918	0.017759637	1.526183600333290E-03	0.9688374	8.78764E-06	0.0311626	0.060285247	gene747	rud_dec_c34800	hypothetical protein BRAFLDRAFT_220539 [Branchiostoma floridae]	F:nucleic acid binding, F:zinc ion binding, C:intracellular		zn692_bovin ame: full=zinc finger protein 692	F:binding	sp|Q3U381|ZN692_MOUSE	ENSDARP00000098395	ENSP00000355426	ENSXETP00000044759	ENSGACP00000025691	ENSORLP00000007366	ENSDARP00000098395	ENSTRUP00000002587	ENSTNIP00000008870	ENSBTAP00000050696	ENSMUSP00000126674	FBpp0290458	ENSCSAVP00000003100	F13H6.1b.1
748	rud_dec_c34465	0.18408306	4.52E-01	0.591782	0.17966658	0.2803524	32	0.035977324	0.016349206	0.019764172	9.846056232229320E-01	0.3210644	2.91215E-06	0.6789356	0.778195603	gene748	rud_dec_c34465	family with sequence similarity member a	C:extracellular region	bos taurus hypothetical loc617002 partial mrna	f172a_xentr ame: full=protein fam172a flags: precursor	C:extracellular region	sp|Q6DIP8|F172A_XENTR	ENSDARP00000069087	ENSP00000387502	ENSXETP00000025347	ENSGACP00000013739	ENSORLP00000012808	ENSDARP00000100725	ENSTRUP00000010600	ENSTNIP00000012794	ENSBTAP00000053527	ENSMUSP00000070739	FBpp0082085		Y75B8A.31		ENSBTAT00000061593	1.00E-16	ENST00000455030	1.00E-11					ENSORLT00000012809	1.00E-08
749	AS_rud_dec_c324	0.34718135	6.00E-01	0.44873512	0.3890528	0.35085642	32	0.030199546	0.027002268	0.023020408	9.064487851264850E-02	0.7633589	6.92389E-06	0.2366411	0.339117895	gene749	AS_rud_dec_c324	copper zinc superoxide dismutase nsodb	F:metal ion binding, P:oxidation reduction, F:oxidoreductase activity, P:superoxide metabolic process, F:superoxide dismutase activity		sodc_danre ame: full=superoxide dismutase	P:response to methylmercury, P:response to metal ion, P:response to xenobiotic stimulus	sp|O73872|SODC_DANRE	ENSDARP00000064375	ENSP00000270142	ENSXETP00000015994	ENSGACP00000027215	ENSORLP00000005499	ENSDARP00000064375	ENSTRUP00000020467	ENSTNIP00000012838	ENSBTAP00000032384	ENSMUSP00000023707	FBpp0075958	ENSCSAVP00000006028	F55H2.1a	ENSCINP00000008786
750	rud_dec_c34889	0.18313597	4.50E-01	0.06882768	0.355254	0.75135905	32	0.010244898	0.025337868	0.039827664	5.741423846643550E-04	0.9808835	8.8969E-06	0.0191165	0.122583583	gene750	rud_dec_c34889	unnamed protein product [Tetraodon nigroviridis]			srcap_human ame: full=helicase srcap ame: full=domino homolog 2 ame: full=snf2-related cbp activator	C:protein complex, P:regulation of transcription from RNA polymerase II promoter, F:histone acetyltransferase activity, F:transcription coactivator activity	sp|Q6ZRS2|SRCAP_HUMAN	ENSDARP00000014502	ENSP00000343042		ENSGACP00000005299	ENSORLP00000015638	ENSDARP00000014502	ENSTRUP00000029397	ENSTNIP00000012982	ENSBTAP00000018503	ENSMUSP00000108054	FBpp0071529	ENSCSAVP00000002731	Y111B2A.22b	ENSCINP00000009729
751	rud_dec_rep_c36525	0.1414562	3.97E-01	0.07767357	0.5967702	0.38465917	32	0.010870748	0.035886621	0.024612245	4.189282806131580E-01	0.5174723	4.69363E-06	0.4825277	0.607596851	gene751	rud_dec_rep_c36525			venerupis decussatus partial srp54 gene for signal recognition particle 54-kda clone exons a-b
752	rud_dec2_c1776	0.0228707	1.67E-01	0.010139477	0.031957563	0.05365487	32	0.00368254	0.005696145	0.006907029	1.034888602816860E-03	0.9743367	8.83752E-06	0.0256633	0.078908384	gene752	rud_dec2_c1776	ribosomal protein	C:ribosome		rt33_mouse ame: full=28s ribosomal protein mitochondrial short=mrp-s33 short=s33mt ame: full=ganglioside-induced differentiation-associated-protein 3	C:mitochondrion	sp|Q9D2R8|RT33_MOUSE	ENSDARP00000114056	ENSP00000417287	ENSXETP00000010528	ENSGACP00000015097		ENSDARP00000048674	ENSTRUP00000030367		ENSBTAP00000006954	ENSMUSP00000031978	FBpp0082767	ENSCSAVP00000000326	F21D5.8						ENSXETT00000010528	8.00E-06					ENSDART00000139561	1.00E-06
753	rud_dec_c27448	5.80E-04	2.69E-02	0.00019355	0.010468262	0.0062764	32	0.000539683	0.002811791	0.001609977	2.945436664276710E-04	0.9863072	8.9461E-06	0.0136928	0.188434125	gene753	rud_dec_c27448	phosphoenolpyruvate carboxykinase	C:cytoplasm, P:gluconeogenesis, F:GTP binding, F:kinase activity, F:phosphoenolpyruvate carboxykinase (GTP) activity	crassostrea gigas mrna for phosphoenolpyruvate carboxykinase (pepck gene)	ppck_haeco ame: full=phosphoenolpyruvate carboxykinase short=pepck ame: full=phosphoenolpyruvate carboxylase	F:phosphoenolpyruvate carboxykinase activity, F:purine nucleotide binding	sp|P29190|PCKG_HAECO	ENSDARP00000018261	ENSP00000216780	ENSXETP00000031961	ENSGACP00000004885	ENSORLP00000016033	ENSDARP00000018261	ENSTRUP00000020541	ENSTNIP00000020630	ENSBTAP00000015834	ENSMUSP00000038555	FBpp0085880	ENSCSAVP00000009428	R11A5.4a
754	AS_rud_dec_rep_c43362	0.27260813	5.39E-01	0.25035238	0.07681073	0.6076094	32	0.020888889	0.009505669	0.034190476	1.011503482800430E-03	0.9746282	8.84017E-06	0.0253718	0.080158599	gene754	AS_rud_dec_rep_c43362			xenopus laevis thymosin beta 4 mrna (cdna clone mgc:196358 image:9041265) complete cds			sp|A8MW06|TMSL3_HUMAN	ENSDARP00000071665	ENSP00000385345				ENSDARP00000071665									ENSBTAT00000024387	3.00E-06			ENSXETT00000011734	8.00E-13					ENSDART00000077197	3.00E-09
756	rud_dec_rep_c33493	0.036310963	2.09E-01	0.51196283	0.016153675	0.017314564	32	0.03275737	0.003696145	0.003238095	5.337511791946090E-01	0.465034	4.218E-06	0.534966	0.657039579	gene756	rud_dec_rep_c33493	qm-like protein	C:ribosome, F:structural constituent of ribosome, P:translation	eurythoe complanata ribosomal protein rpl10 complete cds	rl10_drome ame: full=60s ribosomal protein l10 ame: full=qm protein homolog ame: full=dqm	F:geranyltranstransferase activity, P:mitotic spindle elongation, P:translation, C:ribosome, P:germ cell migration, F:structural constituent of ribosome, F:dimethylallyltranstransferase activity, F:farnesyltranstransferase activity, P:embryonic heart tube development, C:neuronal cell body, C:lipid particle, P:isoprenoid biosynthetic process	sp|O96647|RL10_BOMMA	ENSDARP00000119262	ENSP00000413436	ENSXETP00000023795	ENSGACP00000017315	ENSORLP00000002440	ENSDARP00000036951	ENSTRUP00000005134	ENSTNIP00000005868	ENSBTAP00000009803	ENSMUSP00000082055	FBpp0289148	ENSCSAVP00000019076	F10B5.1.1	ENSCINP00000008228	ENSBTAT00000009803	8.00E-95	ENST00000298283	7.00E-85	ENSXETT00000023795	8.00E-94	ENSGACT00000017349	4.00E-66	ENSORLT00000002441	1.00E-15	ENSDART00000142072	5.00E-81
757	rud_dec_c10762	0.28297558	5.48E-01	0.43518472	0.059732273	0.5448133	32	0.029605442	0.008176871	0.031723356	6.201456301369030E-06	0.9980131	9.05227E-06	0.0019869	0.429443112	gene757	rud_dec_c10762	hypothetical protein BRAFLDRAFT_70433 [Branchiostoma floridae]			rwdd3_xentr ame: full=rwd domain-containing protein 3	C:cytoplasm, C:nucleus	sp|A9ULH0|RWDD3_XENTR		ENSP00000359221	ENSXETP00000054859	ENSGACP00000019123		ENSDARP00000074392		ENSTNIP00000009166	ENSBTAP00000028701	ENSMUSP00000102075
758	rud_dec_c26461	0.005972134	8.96E-02	0.014686902	0.031602006	0.41464844	32	0.004453515	0.005646259	0.025981859	3.888224066338350E-02	0.8436821	7.65245E-06	0.1563179	0.234466215	gene758	rud_dec_c26461						sp|Q6DIP8|F172A_XENTR	ENSDARP00000120519	ENSP00000406471	ENSXETP00000025347			ENSDARP00000100725	ENSTRUP00000030584			ENSMUSP00000096960
759	rud_dec_rep_c46003	0.02835513	1.86E-01	0.32450572	0.021292245	0.008387774	32	0.024734694	0.004390023	0.001954649	2.466090701318530E-04	0.9874707	8.95665E-06	0.0125293	0.20340276	gene759	rud_dec_rep_c46003			tetraodon nigroviridis full-length cdna																				ENST00000447197	2.00E-20			ENSGACT00000012198	5.00E-20			ENSDART00000143291	2.00E-21
760	rud_dec2_c1849	0.29913226	5.62E-01	0.9633336	0.07961237	0.9547946	32	0.048811791	0.009804989	0.048258503	1.624191886548940E-04	0.9898317	8.97807E-06	0.0101683	0.258260762	gene760	rud_dec2_c1849	tax1 (human t-cell leukemia virus type i) binding protein 1b			txb1b_danre ame: full=tax1-binding protein 1 homolog b		sp|Q6P132|TXB1B_DANRE	ENSDARP00000106470	ENSP00000377275	ENSXETP00000001661	ENSGACP00000010876	ENSORLP00000009476	ENSDARP00000040726	ENSTRUP00000039354	ENSTNIP00000003999	ENSBTAP00000033573	ENSMUSP00000079548	FBpp0075702	ENSCSAVP00000012356		ENSCINP00000002495
761	rud_dec_c5700	0.6613641	8.01E-01	0.54095405	0.55087656	0.44947135	32	0.034036281	0.034054422	0.027464853	1.462760693129890E-03	0.9694915	8.79357E-06	0.0305085	0.061807608	gene761	rud_dec_c5700	Septin-1 [Camponotus floridanus]		apis mellifera septin-1-like mrna	sept1_drome ame: full=septin-1 ame: full=diff6 protein homolog ame: full=protein innocent bystander	C:septin ring, P:positive regulation of apoptosis, P:cytokinesis, P:cell cycle, P:cellularization, C:germline ring canal, F:ubiquitin protein ligase binding, C:septin complex, F:GTPase activity, F:GTP binding	sp|P42207|SEPT1_DROME	ENSDARP00000032060	ENSP00000385387	ENSXETP00000040281	ENSGACP00000007354	ENSORLP00000003327	ENSDARP00000032060	ENSTRUP00000000679	ENSTNIP00000010669	ENSBTAP00000043669	ENSMUSP00000127276	FBpp0076897	ENSCSAVP00000006182	Y50E8A.4c	ENSCINP00000018050	ENSBTAT00000001568	2.00E-07	ENST00000402251	2.00E-16	ENSXETT00000026555	3.00E-16	ENSGACT00000007372	1.00E-16	ENSORLT00000003328	2.00E-17
763	AS_rud_dec_c29122	0.23203617	5.01E-01	0.7888356	0.12218067	0.4562749	32	0.042820862	0.012770975	0.027759637	1.263420607358510E-02	0.9105047	8.25855E-06	0.0894953	0.140388031	gene763	AS_rud_dec_c29122	achain interferon regulatory factor-2 dna binding minimized average structure			irf2_chick ame: full=interferon regulatory factor 2 short=irf-2	P:regulation of transcription. DNAdependent, C:nucleus, F:transcription factor activity	sp|Q98925|IRF2_CHICK	ENSDARP00000059229	ENSP00000427204	ENSXETP00000003210	ENSGACP00000024805	ENSORLP00000010761	ENSDARP00000021810	ENSTRUP00000004254	ENSTNIP00000022879	ENSBTAP00000013193	ENSMUSP00000034041		ENSCSAVP00000019749		ENSCINP00000001474
766	new_rud_dec_rep_c35952	0.4697458	6.87E-01	0.32377687	0.7036053	0.43783224	32	0.024698413	0.039668934	0.026952381	9.579953672869120E-04	0.9753082	8.84633E-06	0.0246918	0.083901884	gene766	new_rud_dec_rep_c35952
767	rud_dec2_c1272	0.23603018	5.05E-01	0.4934787	0.05055163	0.7801094	32	0.032004535	0.007478458	0.041056689	5.132702134071670E-01	0.4737266	4.29684E-06	0.5262734	0.649111748	gene767	rud_dec2_c1272	n-acylsphingosine amidohydrolase 2-like		venerupis decussatus epic-pcr fragment clone c9	ncseb_dicdi ame: full=neutral ceramidase b short=n-cdase b short=ncdase b ame: full=acylsphingosine deacylase 2b ame: full=n-acylsphingosine amidohydrolase 2b flags: precursor		sp|Q55G11|NCSEB_DICDI	ENSDARP00000024847	ENSP00000392766	ENSXETP00000014494		ENSORLP00000025276	ENSDARP00000024847	ENSTRUP00000009972	ENSTNIP00000007268	ENSBTAP00000038777	ENSMUSP00000108146	FBpp0085007	ENSCSAVP00000014626		ENSCINP00000006321
768	rud_dec2_c145	0.29396603	5.59E-01	0.30734137	0.8000713	0.113041	32	0.023877551	0.043156463	0.010843537	1.975017864838260E-01	0.6567449	5.95687E-06	0.3432551	0.464771031	gene768	rud_dec2_c145	elongation factor 2	F:translation elongation factor activity, F:GTP binding	xenopus laevis eukaryotic translation elongation factor gene 1 ( ) mrna	ef2_chick ame: full=elongation factor 2 short=ef-2	C:cytoplasm, F:translation elongation factor activity, F:GTP binding, F:protein binding, C:ribonucleoprotein complex, P:translation, F:GTPase activity	sp|Q90705|EF2_CHICK	ENSDARP00000024752	ENSP00000307940	ENSXETP00000013988	ENSGACP00000016980	ENSORLP00000005813	ENSDARP00000024752	ENSTRUP00000045946	ENSTNIP00000013544	ENSBTAP00000005581	ENSMUSP00000046101	FBpp0085265	ENSCSAVP00000006629	F25H5.4.2	ENSCINP00000000308	ENSBTAT00000005581	2.00E-111	ENST00000309311	1.00E-97	ENSXETT00000046505	5.00E-164	ENSGACT00000017014	4.00E-121	ENSORLT00000005814	4.00E-145	ENSDART00000051081	7.00E-127
769	rud_dec_c11294	0.32369566	5.82E-01	0.1538643	0.6648108	0.52839774	32	0.015709751	0.038285714	0.031034014	1.031500591011530E-03	0.9743788	8.8379E-06	0.0256212	0.079065646	gene769	rud_dec_c11294	hypothetical protein BRAFLDRAFT_125701 [Branchiostoma floridae]	F:binding, F:sugar binding
771	rud_dec_c13590	0.050853014	2.45E-01	0.87023973	0.021486651	0.47576904	32	0.045727891	0.004426304	0.02861678	1.880326217277450E+00	0.1702971	1.54464E-06	0.8297029	0.891578774	gene771	rud_dec_c13590	dgkd protein	F:diacylglycerol kinase activity, P:protein homooligomerization, C:cytoplasmic membranebounded vesicle, P:diacylglycerol metabolic process, P:signal transduction, F:protein heterodimerization activity, F:protein homodimerization activity, P:cell surface receptor linked signaling pathway, P:response to organic substance, C:plasma membrane		dgkd_human ame: full=diacylglycerol kinase delta short=dag kinase delta ame: full=130 kda diacylglycerol kinase ame: full=diglyceride kinase delta short=dgk-delta	F:diacylglycerol kinase activity, P:protein homooligomerization, C:cytoplasmic membranebounded vesicle, P:diacylglycerol metabolic process, P:signal transduction, F:protein heterodimerization activity, F:protein homodimerization activity, P:cell surface receptor linked signaling pathway, P:response to organic substance, C:plasma membrane	sp|Q16760|DGKD_HUMAN	ENSDARP00000016655	ENSP00000386455	ENSXETP00000031872	ENSGACP00000006417	ENSORLP00000016610	ENSDARP00000056105	ENSTRUP00000015941	ENSTNIP00000014129	ENSBTAP00000024842	ENSMUSP00000027517	FBpp0111537	ENSCSAVP00000005976	F42A9.1b
772	new_rud_dec_c39033	0.20070186	4.70E-01	0.22494215	0.23732069	0.31869012	32	0.019537415	0.019492063	0.021546485	1.010324302228580E-03	0.974643	8.8403E-06	0.025357	0.080342113	gene772	new_rud_dec_c39033			ruditapes philippinarum srp54 intron isolate ai16
773	newAS_rud_dec_c26752	0.5741284	7.54E-01	0.77225244	0.41330233	0.46710694	32	0.042244898	0.028099773	0.028217687	3.256335988874070E-02	0.8567968	7.7714E-06	0.1432032	0.216801109	gene773	newAS_rud_dec_c26752			ruditapes philippinarum srp54 intron isolate ai16
774	rud_dec_c35315	0.031084092	1.96E-01	0.021404902	0.8987633	0.027961047	32	0.005405896	0.046544218	0.004507937	4.652486327358920E-04	0.9827913	8.91421E-06	0.0172087	0.142732506	gene774	rud_dec_c35315	ubiquitin carboxyl-terminal hydrolase	F:hydrolase activity	taeniopygia guttata ubiquitin carboxyl-terminal esterase l3 mrna	uchl_aplca ame: full=ubiquitin carboxyl-terminal hydrolase ame: full=ubiquitin thioesterase	F:hydrolase activity	sp|O01391|UCHL_APLCA	ENSDARP00000095097	ENSP00000366819	ENSXETP00000010224	ENSGACP00000002423	ENSORLP00000014213	ENSDARP00000095097	ENSTRUP00000026836	ENSTNIP00000018038	ENSBTAP00000035448	ENSMUSP00000002289	FBpp0077516		Y40G12A.1.1										ENSORLT00000014214	1.00E-09
775	rud_dec_c5461	0.06600579	2.76E-01	0.8651773	0.010902613	0.55942756	32	0.045596372	0.002888889	0.032294785	3.987224753115980E+00	0.04584652	4.15841E-07	0.95415348	0.973224189	gene775	rud_dec_c5461			venerupis pullastra microsatellite locus 2-74
776	AS_rud_dec2_c802	0.22221188	4.90E-01	0.077924	0.6760164	0.63016975	32	0.010902494	0.038752834	0.035052154	5.183635146295270E-04	0.9818357	8.90554E-06	0.0181643	0.131727026	gene776	AS_rud_dec2_c802	PREDICTED: hypothetical protein [Saccoglossus kowalevskii]						ENSDARP00000072017
777	AS_rud_dec_c35532	0.57453805	7.55E-01	0.18219396	0.5712627	0.4592953	32	0.017265306	0.0349161	0.027895692	1.196859575827600E-03	0.9724022	8.81997E-06	0.0275978	0.070517049	gene777	AS_rud_dec_c35532																					ENSBTAT00000006650	6.00E-06					ENSGACT00000006180	5.00E-06			ENSDART00000131139	2.00E-07
780	AS_rud_dec_c15503	0.8428369	9.05E-01	0.61503947	0.91752815	0.5967635	32	0.036829932	0.047120181	0.033782313	1.197827207761290E-03	0.972391	8.81987E-06	0.027609	0.070480317	gene780	AS_rud_dec_c15503	heat repeat-containing protein 4-like
781	rud_dec_c2770	0.13518009	3.90E-01	0.29017735	0.5488248	0.08822566	32	0.023047619	0.033986395	0.009306122	7.138114766917160E-03	0.9326689	8.45958E-06	0.0673311	0.106943907	gene781	rud_dec_c2770	cytochrome c oxidase subunit i		venerupis decussatus voucher fmnh 306189 cytochrome oxidase subunit i partial cds mitochondrial	cox1_anapl ame: full=cytochrome c oxidase subunit 1 ame: full=cytochrome c oxidase polypeptide i	F:oxidoreductase activity, F:iron ion binding, P:oxidation reduction, C:membrane part, C:mitochondrion, P:generation of precursor metabolites and energy	sp|P25001|COX1_PISOC	ENSDARP00000087871	ENSP00000354499		ENSGACP00000027662		ENSDARP00000087871	ENSTRUP00000047831	ENSTNIP00000003835	ENSBTAP00000053147	ENSMUSP00000080993	FBpp0100176		MTCE.26		ENSBTAT00000060569	7.00E-17	ENST00000430139	5.00E-15							ENSDART00000093606	1.00E-22
782	AS_rud_dec_c27550	0.051184893	2.46E-01	0.60678643	0.35795662	0.014191147	32	0.036503401	0.025455782	0.002820862	1.149511903685150E-02	0.9146182	8.29586E-06	0.0853818	0.134355972	gene782	AS_rud_dec_c27550	bchain crystal structure of the mutated s328n hklc2 tpr domain	C:neuron projection, F:protein binding, C:ciliary rootlet, C:cytosol, C:kinesin complex, P:axon cargo transport, F:microtubule motor activity, C:microtubule	sqdsklcloligo pealii kinesin light chain complete cds	klc_strpu ame: full=kinesin light chain short=klc	F:microtubule motor activity, C:microtubule, F:binding, C:kinesin complex	sp|Q05090|KLC_STRPU	ENSDARP00000010720	ENSP00000412693	ENSXETP00000049851	ENSGACP00000005383	ENSORLP00000016250	ENSDARP00000010720	ENSTRUP00000020174	ENSTNIP00000016417	ENSBTAP00000023001	ENSMUSP00000082004	FBpp0075683	ENSCSAVP00000013045	C18C4.10b.5		ENSBTAT00000023001	7.00E-49	ENST00000389744	6.00E-58	ENSXETT00000049851	7.00E-54	ENSGACT00000016455	6.00E-43	ENSORLT00000010217	9.00E-46	ENSDART00000008987	2.00E-59
783	rud_dec_c5758	0.13355124	3.88E-01	0.310177	0.30884498	0.09781341	32	0.024013605	0.02321542	0.009945578	6.722065822176570E+00	0.009522726	8.63739E-08	0.990477274	0.995081206	gene783	rud_dec_c5758	hypothetical protein IscW_ISCW021118 [Ixodes scapularis]		Pediculus humanus corporis hypothetical protein. mRNA	mkl1_mouse ame: full=mkl myocardin-like protein 1 ame: full=basic sap coiled-coil transcription activator ame: full=megakaryoblastic leukemia 1 protein homolog ame: full=myocardin-related transcription factor a short=mrtf-a		sp|Q9ULH7|MKL2_HUMAN	ENSDARP00000101066	ENSP00000345841	ENSXETP00000024057	ENSGACP00000006631	ENSORLP00000006425	ENSDARP00000101066	ENSTRUP00000043410	ENSTNIP00000015898	ENSBTAP00000011499	ENSMUSP00000122815	FBpp0288507	ENSCSAVP00000007948		ENSCINP00000019428
784	new_rud_dec_c36846	0.17484346	4.41E-01	0.1621575	0.40784514	0.2622218	32	0.016172336	0.02784127	0.018929705	8.206791573002190E-04	0.9771457	8.863E-06	0.0228543	0.094743493	gene784	new_rud_dec_c36846			venerupis decussatus epic-pcr fragment clone c7
785	new_rud_dec_rep_c19966	0.18189344	4.50E-01	0.06843873	0.55435	0.086911924	32	0.010222222	0.034199546	0.009238095	1.326898729473660E-03	0.9709422	8.80673E-06	0.0290578	0.065689936	gene785	new_rud_dec_rep_c19966			spisula solidissima complete sequence
786	new_rud_dec_c17497	0.40856817	6.49E-01	0.2668708	0.5350115	0.12295734	32	0.021782313	0.033287982	0.011387755	7.569115625756230E-04	0.9780513	8.87121E-06	0.0219487	0.10018241	gene786	new_rud_dec_c17497			zebrafish dna sequence from clone ch211-230e14 in linkage group 9 contains the nfe2l2 gene for nuclear factor (erythroid-derived 2)-like the gene for a novel protein vertebrate heterogeneous nuclear ribonucleoprotein family (zgc:153703) and two complete sequence
787	rud_dec_c2573	0.04212488	2.24E-01	0.16508646	0.10378828	0.09156539	32	0.016294785	0.011514739	0.009528345	1.026022675851770E+00	0.3110947	2.82172E-06	0.6889053	0.787248924	gene787	rud_dec_c2573			venerupis pullastra satellite vpu193m sequence
788	rud_dec_c31705	0.37655687	6.25E-01	0.95042044	0.3038058	0.12297216	32	0.048453515	0.022907029	0.01139229	3.864890903173540E-04	0.9843151	8.92803E-06	0.0156849	0.159496912	gene788	rud_dec_c31705	annexin ix cg5730-pc			anx11_drome ame: full=annexin-b11	P:regulation of cell shape, P:cell adhesion, F:binding	sp|P26256|ANX12_HYDVU	ENSDARP00000016879	ENSP00000265447	ENSXETP00000050219	ENSGACP00000002962	ENSORLP00000008376	ENSDARP00000016879	ENSTRUP00000035499	ENSTNIP00000010709	ENSBTAP00000027893	ENSMUSP00000022416	FBpp0089018	ENSCSAVP00000001260	ZC155.1.2	ENSCINP00000008762
789	rud_dec_c11463	0.09407204	3.30E-01	0.735079	0.032560367	0.12195927	32	0.040839002	0.005759637	0.011333333	6.196756782694590E-01	0.4311678	3.91082E-06	0.5688322	0.687074002	gene789	rud_dec_c11463
790	AS_rud_dec_c8406	0.3965874	6.41E-01	0.26401648	0.8305286	0.13241883	32	0.021609977	0.04414966	0.011972789	1.471760094545970E-03	0.9693978	8.79272E-06	0.0306022	0.061668748	gene790	AS_rud_dec_c8406	hypothetical protein AND_06846 [Anopheles darlingi]			ndub5_human ame: full=nadh dehydrogenase 1 beta subcomplex subunit mitochondrial ame: full=complex i-sgdh short=ci-sgdh ame: full=nadh-ubiquinone oxidoreductase sgdh subunit flags: precursor	C:membrane part, C:mitochondrion	sp|Q0MQD8|NDUB5_PANTR	ENSDARP00000095073	ENSP00000418354	ENSXETP00000015780	ENSGACP00000013218	ENSORLP00000007173	ENSDARP00000095073	ENSTRUP00000045108	ENSTNIP00000018616	ENSBTAP00000048795	ENSMUSP00000113602	FBpp0075755	ENSCSAVP00000016259	C25H3.9b	ENSCINP00000003650
792	new_rud_dec_rep_c32667	0.017623734	1.48E-01	0.053978346	0.1011572	0.12921523	32	0.008993197	0.011315193	0.011786848	1.161059586157360E+00	0.2812459	2.55098E-06	0.7187541	0.809856531	gene792	new_rud_dec_rep_c32667			spisula solidissima complete sequence
793	AS_rud_dec_c8065	0.5554161	7.42E-01	0.53301996	0.9617657	0.1968434	32	0.033678005	0.048739229	0.015428571	1.348748241866810E-03	0.970704	8.80457E-06	0.029296	0.06504125	gene793	AS_rud_dec_c8065	hypothetical protein BRAFLDRAFT_278645 [Branchiostoma floridae]	F:DNAdirected RNA polymerase activity, F:DNA binding, P:transcription, C:nucleus	saccoglossus kowalevskii dna directed rna polymerase ii polypeptide e-like mrna	rpab1_mouse ame: full=dna-directed rna polymerases and iii subunit rpabc1 short=rna polymerases and iii subunit abc1 ame: full=dna-directed rna polymerase ii subunit e ame: full=rpb5 homolog	F:DNAdirected RNA polymerase activity, F:protein kinase activity, P:transcription initiation from RNA polymerase II promoter, P:RNA splicing, C:DNAdirected RNA polymerase II. core complex, F:DNA binding, P:RNA elongation from RNA polymerase II promoter	sp|B0BNE2|RPAB1_RAT	ENSDARP00000028718	ENSP00000215587	ENSXETP00000007134	ENSGACP00000017528	ENSORLP00000019213	ENSDARP00000028718	ENSTRUP00000046681	ENSTNIP00000016170	ENSBTAP00000027684	ENSMUSP00000004786	FBpp0087332	ENSCSAVP00000012132	H27M09.2		ENSBTAT00000027684	7.00E-29			ENSXETT00000007134	2.00E-29	ENSGACT00000017562	3.00E-32	ENSORLT00000019214	5.00E-36	ENSDART00000035670	2.00E-39
794	rud_dec_c31070	0.5868439	7.64E-01	0.9540353	0.2790097	0.66690457	32	0.048594104	0.021673469	0.03645805	7.841222375759570E-04	0.9776604	8.86767E-06	0.0223396	0.097679259	gene794	rud_dec_c31070	predicted protein [Nematostella vectensis]	P:intracellular signaling pathway												ENSTNIP00000014052
795	newAS_rud_dec_c14472	0.113853626	3.60E-01	0.03306964	0.8568861	0.17232324	32	0.006997732	0.045034014	0.014253968	1.070716211870600E-04	0.991744	8.99541E-06	0.008256	0.306417131	gene795	newAS_rud_dec_c14472			venerupis decussatus partial srp54 gene for signal recognition particle 54-kda clone exons a-b
796	new_rud_dec_c21324	0.09908939	3.39E-01	0.50242996	0.02998761	0.7395718	32	0.032312925	0.005446712	0.039333333	1.601317348806670E+00	0.2057166	1.86591E-06	0.7942834	0.867557067	gene796	new_rud_dec_c21324			Dictyostelium discoideum AX4 hypothetical protein (DDB_G0286901) mRNA. complete cds																												ENSDART00000081093	4.00E-09
797	rud_dec_c34903	0.29646978	5.60E-01	0.16092001	0.11984062	0.31921837	32	0.016104308	0.01261678	0.021555556	1.536479109347510E-03	0.9687326	8.78669E-06	0.0312674	0.060034933	gene797	rud_dec_c34903
798	rud_dec_c15658	0.6130095	7.76E-01	0.22311248	0.5264161	0.41480425	32	0.019460317	0.032897959	0.025995465	1.877162130881510E-03	0.9654415	8.75684E-06	0.0345585	0.056898931	gene798	rud_dec_c15658	trna nucleotidyl cca- 1		meleagris gallopavo cca trna nucleotidyltransferase mitochondrial-like mrna	trnt1_mouse ame: full=cca trna nucleotidyltransferase mitochondrial ame: full=mitochondrial trna nucleotidyl cca-adding short=mt cca-adding enzyme short=mt trna cca-diphosphorylase short=mt trna cca-pyrophosphorylase short=mt trna adenylyltransferase flags: precursor	F:transferase activity, P:RNA processing, P:tRNA processing, C:mitochondrion, F:nucleotide binding, F:tRNA nucleotidyltransferase activity, F:ATP binding, F:RNA binding, F:tRNA adenylyltransferase activity	sp|Q8K1J6|TRNT1_MOUSE	ENSDARP00000097969	ENSP00000418157	ENSXETP00000053801	ENSGACP00000015756	ENSORLP00000003943	ENSDARP00000026059	ENSTRUP00000002548	ENSTNIP00000010168	ENSBTAP00000026029	ENSMUSP00000108874	FBpp0078373	ENSCSAVP00000012763	F55B12.4.2	ENSCINP00000014512			ENST00000473275	1.00E-06
799	rud_dec_c2632	0.763293	8.59E-01	0.36517072	0.47733533	0.7911693	32	0.026702948	0.0309161	0.041573696	1.467834548520840E-03	0.9694387	8.79309E-06	0.0305613	0.061665241	gene799	rud_dec_c2632	unnamed protein product [Mus musculus]	P:auxin biosynthetic process, P:intracellular protein kinase cascade, F:protein serine/threonine kinase activity, P:spliceosome assembly, F:ATP binding, P:cell differentiation, F:protein binding, F:magnesium ion binding, C:cytoplasm, C:nucleus, P:protein amino acid phosphorylation	callithrix jacchus sfrs protein kinase 2 mrna	srpk2_mouse ame: full=serine threonine-protein kinase srpk2 ame: full=sfrs protein kinase 2 ame: full=serine arginine-rich protein-specific kinase 2 short=sr-protein-specific kinase 2		sp|O54781|SRPK2_MOUSE	ENSDARP00000023666	ENSP00000394675	ENSXETP00000001634	ENSGACP00000010780	ENSORLP00000003275	ENSDARP00000016135	ENSTRUP00000041645	ENSTNIP00000008529	ENSBTAP00000002818	ENSMUSP00000085734	FBpp0086515	ENSCSAVP00000009321	B0464.5b.1	ENSCINP00000013881	ENSBTAT00000002818	2.00E-49	ENST00000457338	2.00E-52	ENSXETT00000050136	9.00E-48	ENSGACT00000010192	5.00E-38	ENSORLT00000008094	9.00E-47	ENSDART00000042972	2.00E-40
800	rud_dec_c3639	0.12615864	3.78E-01	0.027742045	0.9306283	0.8679349	32	0.006258503	0.047582766	0.044639456	4.022977427666770E-04	0.9839976	8.92515E-06	0.0160024	0.154056293	gene800	rud_dec_c3639	coiled-coil domain-containing protein 112-like isoform 1			cc112_macfa ame: full=coiled-coil domain-containing protein 112		sp|Q4R8R3|CC112_MACFA		ENSP00000296647	ENSXETP00000024667	ENSGACP00000009817	ENSORLP00000006203	ENSDARP00000075938	ENSTRUP00000030704	ENSTNIP00000005776	ENSBTAP00000002468	ENSMUSP00000072614		ENSCSAVP00000004538
801	rud_dec_c11236	0.729817	8.40E-01	0.51501936	0.33426523	0.9122876	32	0.032911565	0.024326531	0.046517007	1.450599859538210E-03	0.9696185	8.79473E-06	0.0303815	0.062109658	gene801	rud_dec_c11236	hypothetical protein [Schistosoma mansoni]	F:zinc ion binding, C:intracellular
803	newAS_rud_dec_c22738	0.67666924	8.10E-01	0.9830869	0.37268648	0.32314944	32	0.049492063	0.026249433	0.021768707	8.626896059809040E-04	0.9765682	8.85776E-06	0.0234318	0.090500607	gene803	newAS_rud_dec_c22738			dicentrarchus labrax chromosome sequence corresponding to linkage group complete sequence																								ENSGACT00000009461	0.000000005
804	AS_rud_dec_c18048	0.21485192	4.85E-01	0.10957335	0.16985106	0.11005917	32	0.013020408	0.015709751	0.010662132	1.041020629998000E-03	0.9742608	8.83683E-06	0.0257392	0.078506697	gene804	AS_rud_dec_c18048			PREDICTED: Danio rerio hypothetical protein LOC100332596 (LOC100332596). mRNA																								ENSGACT00000001027	5.00E-49			ENSDART00000101601	9.00E-18
806	rud_dec2_c2070	0.5572509	7.44E-01	0.24510866	0.6705566	0.5656762	32	0.020553288	0.038544218	0.032544218	5.073220860367650E-04	0.9820301	8.9073E-06	0.0179699	0.13365871	gene806	rud_dec2_c2070	hypothetical protein BRAFLDRAFT_279226 [Branchiostoma floridae]	F:serinetype peptidase activity, P:proteolysis	rana catesbeiana clone rcat-evr-537-055 alpha-aspartyl dipeptidase complete cds	pepe_xenla ame: full=alpha-aspartyl dipeptidase ame: full=asp-specific dipeptidase ame: full=dipeptidase e	C:cytoplasm, F:dipeptidase activity, P:proteolysis, F:serinetype peptidase activity	sp|Q91642|PEPE_XENLA	ENSDARP00000114964		ENSXETP00000002366		ENSORLP00000017723	ENSDARP00000093284	ENSTRUP00000030607				FBpp0073552								ENSXETT00000002366	4.00E-68			ENSORLT00000017724	6.00E-28	ENSDART00000146585	4.00E-53
807	rud_dec_c7992	0.36013716	6.11E-01	0.32664618	0.10236627	0.33625045	32	0.024820862	0.011433107	0.022312925	1.125217212347700E-03	0.9732406	8.82758E-06	0.0267594	0.073705364	gene807	rud_dec_c7992	hypothetical protein SINV_03381 [Solenopsis invicta]		candida albicans sc5314 likely mitochondrial ribosomal protein s12 complete cds	rt12_drome ame: full=40s ribosomal protein mitochondrial short=mrp-s12 short=s12mt ame: full=mt-rps12 ame: full=protein technical knockout locus flags: precursor	P:translation, P:detection of mechanical stimulus involved in sensory perception of sound, P:male courtship behavior, F:structural constituent of ribosome, C:mitochondrial small ribosomal subunit	sp|P10735|RT12_DROME	ENSDARP00000108270	ENSP00000384952	ENSXETP00000011683	ENSGACP00000003948	ENSORLP00000008844		ENSTRUP00000044433	ENSTNIP00000007562	ENSBTAP00000002335	ENSMUSP00000062066	FBpp0070443	ENSCSAVP00000014989	T03D8.2.2	ENSCINP00000025837
808	rud_dec_c30676	0.73533416	8.43E-01	0.9867902	0.2926022	0.58665025	32	0.049596372	0.022353741	0.033356009	1.410838237155750E-01	0.7072059	6.41457E-06	0.2927941	0.407251655	gene808	rud_dec_c30676	GT198a [Mus musculus]	F:estrogen receptor binding, F:androgen receptor binding, P:meiosis, C:proteasome complex, F:glucocorticoid receptor binding, P:positive regulation of transcription from RNA polymerase II promoter, F:DNA binding, F:thyroid hormone receptor binding, C:nucleus	mus musculus gt198a complete alternatively spliced	hop2_mouse ame: full=homologous-pairing protein 2 homolog ame: full=psmc3-interacting protein ame: full=proteasome 26s atpase subunit 3-interacting protein ame: full=tat-binding protein 1-interacting protein short=tbp-1-interacting protein	F:estrogen receptor binding, F:androgen receptor binding, P:meiosis, C:proteasome complex, F:glucocorticoid receptor binding, P:positive regulation of transcription from RNA polymerase II promoter, F:DNA binding, F:thyroid hormone receptor binding, C:nucleus	sp|O35047|HOP2_MOUSE	ENSDARP00000055227	ENSP00000377384	ENSXETP00000021980	ENSGACP00000018788	ENSORLP00000005602	ENSDARP00000055227	ENSTRUP00000037496	ENSTNIP00000014640	ENSBTAP00000040460	ENSMUSP00000019447		ENSCSAVP00000015540					ENST00000393795	9.00E-16	ENSXETT00000021980	1.00E-11			ENSORLT00000005603	3.00E-06
809	rud_dec_c20993	0.8863279	9.31E-01	0.9073882	0.47382098	0.7231565	32	0.046902494	0.030793651	0.038734694	7.953848484589790E-04	0.9775006	8.86622E-06	0.0224994	0.096577448	gene809	rud_dec_c20993											ENSORLP00000023649
810	AS_rud_dec2_c1902	0.34234735	5.96E-01	0.1400001	0.484233	0.71856964	32	0.014920635	0.031165533	0.038544218	8.990276393205930E-04	0.97608	8.85333E-06	0.02392	0.087714624	gene810	AS_rud_dec2_c1902	PREDICTED: similar to BolA protein. putative [Tribolium castaneum]		nasonia vitripennis mrna	y7416_dicdi ame: full= -like protein ddb_g0274169		sp|Q9KPS0|BOLA_VIBCH	ENSDARP00000058384	ENSP00000358146	ENSXETP00000028006	ENSGACP00000017438	ENSORLP00000020400	ENSDARP00000058384	ENSTRUP00000009912	ENSTNIP00000013201	ENSBTAP00000043360	ENSMUSP00000102716	FBpp0084043		K11H12.1
811	rud_dec_c38858	0.93082684	9.56E-01	0.9504649	0.61418575	0.8251557	32	0.04845805	0.036507937	0.043024943	2.322816999367200E-04	0.9878401	8.96E-06	0.0121599	0.213097898	gene811	rud_dec_c38858			spisula solidissima complete sequence
812	AS_rud_dec2_c1206	0.6632497	8.02E-01	0.81892824	0.22483534	0.8550759	32	0.043950113	0.018848073	0.044090703	5.149188079940350E-04	0.9818961	8.90609E-06	0.0181039	0.132421559	gene812	AS_rud_dec2_c1206	hypothetical protein DAPPUDRAFT_50246 [Daphnia pulex]			cav3_rat ame: full=caveolin-3	C:neuromuscular junction, P:regulation of muscle system process, P:regulation of heart contraction, P:regulation of molecular function, P:elevation of cytosolic calcium ion concentration, C:cell surface, C:protein complex, P:cell differentiation, C:Z disc, C:Ttubule, P:cell growth, C:vesicular fraction, C:caveola, F:enzyme binding, P:positive regulation of microtubule polymerization, C:soluble fr…	sp|P51638|CAV3_RAT	ENSDARP00000034317	ENSP00000380525	ENSXETP00000053955	ENSGACP00000001179	ENSORLP00000000896	ENSDARP00000034317	ENSTRUP00000006863	ENSTNIP00000017652	ENSBTAP00000030761	ENSMUSP00000074922		ENSCSAVP00000008540	T13F2.8	ENSCINP00000002782
813	AS_rud_dec_c10420	0.6340272	7.86E-01	0.41513595	0.45766106	0.729511	32	0.028816327	0.030049887	0.038943311	2.614248897430110E-04	0.9870999	8.95329E-06	0.0129001	0.199156586	gene813	AS_rud_dec_c10420	hypothetical protein BRAFLDRAFT_115498 [Branchiostoma floridae]	F:protein kinase activity, P:cellular metabolic process, F:nucleotide binding	danio rerio zgc: mrna (cdna clone mgc:192552 image:100061008) complete cds	zap70_mouse ame: full=tyrosine-protein kinase zap-70 ame: full=70 kda zeta-associated protein ame: full=syk-related tyrosine kinase		sp|P43404|ZAP70_MOUSE	ENSDARP00000006727	ENSP00000374169	ENSXETP00000020939	ENSGACP00000010173	ENSORLP00000011416	ENSDARP00000006727	ENSTRUP00000024636	ENSTNIP00000013062	ENSBTAP00000007743	ENSMUSP00000068307	FBpp0086382	ENSCSAVP00000013465	C01C7.1a	ENSCINP00000016889	ENSBTAT00000007743	4.00E-15	ENST00000375746	3.00E-19	ENSXETT00000001796	1.00E-33	ENSGACT00000010195	7.00E-24	ENSORLT00000011417	3.00E-27	ENSDART00000015038	4.00E-37
815	rud_dec_rep_c44943	4.42E-06	1.87E-03	4.77704E-07	0.003919423	0.048471957	32	4.53515E-05	0.001614512	0.006480726	5.220685817562290E-03	0.9423995	8.54784E-06	0.0576005	0.091965572	gene815	rud_dec_rep_c44943	predicted protein [Nematostella vectensis]		apis mellifera hypothetical loc551823 miscrna	ddx23_human ame: full=probable atp-dependent rna helicase ddx23 ame: full=100 kda u5 snrnp-specific protein ame: full=dead box protein 23 ame: full=prp28 homolog ame: full=u5-100kd	F:ATPdependent RNA helicase activity, C:spliceosomal complex, F:nucleic acid binding, F:ATP binding, F:protein binding, P:cis assembly of precatalytic spliceosome, C:U5 snRNP	sp|Q5RC67|DDX23_PONAB	ENSDARP00000007528	ENSP00000310723	ENSXETP00000026302	ENSGACP00000003970	ENSORLP00000015434	ENSDARP00000007528	ENSTRUP00000001070		ENSBTAP00000029071	ENSMUSP00000003450	FBpp0080622	ENSCSAVP00000006945	F01F1.7	ENSCINP00000003862							ENSGACT00000003984	1.00E-08	ENSORLT00000015435	3.00E-08
816	rud_dec_c35514	0.40341306	6.46E-01	0.25167727	0.14735909	0.62330014	32	0.020947846	0.014367347	0.034802721	2.382247874708180E+00	0.1227208	1.11311E-06	0.8772792	0.924851628	gene816	rud_dec_c35514	myosin -like																FBpp0271774
817	rud_dec_c4788	0.5189148	7.20E-01	0.3659166	0.1907676	0.76200736	32	0.026743764	0.016956916	0.040294785	8.959399750665390E-04	0.9761211	8.85371E-06	0.0238789	0.088003047	gene817	rud_dec_c4788			zebrafish dna sequence from clone dkey-15j19 in linkage group complete sequence
818	new_rud_dec_rep_c39604	0.20923088	4.79E-01	0.8733024	0.09189845	0.12566282	32	0.045795918	0.010643991	0.011555556	9.140171897570320E-04	0.9758815	8.85153E-06	0.0241185	0.08634564	gene818	new_rud_dec_rep_c39604
821	new_rud_dec_c14370	0.004728977	8.03E-02	0.007590613	0.8887297	0.003215312	32	0.00321542	0.046172336	0.001002268	7.873598315200060E-05	0.9929202	9.00608E-06	0.0070798	0.333506989	gene821	new_rud_dec_c14370									ENSXETP00000051541
822	AS_rud_dec_c18821	0.30202264	5.64E-01	0.7984444	0.15138493	0.5073534	32	0.043197279	0.014634921	0.030063492	3.638440363191070E-01	0.5463791	4.95582E-06	0.4536209	0.57953908	gene822	AS_rud_dec_c18821	one cut homeobox 1	F:DNA binding	schistosoma mansoni one cut domain family complete cds	onec_drome ame: full=homeobox protein onecut		sp|Q9NJB5|ONEC_DROME	ENSDARP00000026697	ENSP00000262095	ENSXETP00000056800	ENSGACP00000016751	ENSORLP00000006282	ENSDARP00000026697	ENSTRUP00000001592	ENSTNIP00000022830	ENSBTAP00000030942	ENSMUSP00000053288	FBpp0088173	ENSCSAVP00000000138	C17H12.9.2		ENSBTAT00000030977	1.00E-16	ENST00000382349	5.00E-17	ENSXETT00000062572	1.00E-21	ENSGACT00000021863	3.00E-18	ENSORLT00000019129	1.00E-21	ENSDART00000078885	1.00E-25
823	rud_dec_rep_c32396	0.035482425	2.08E-01	0.04268936	0.04247337	0.01743831	32	0.007904762	0.006702948	0.003265306	1.509986626956560E-03	0.9690032	8.78914E-06	0.0309968	0.060883415	gene823	rud_dec_rep_c32396	ribosomal protein l3	C:ribonucleoprotein complex	argopecten irradians isolate iolsaicl555ct596cn620 ribosomal protein l3 partial cds	rl3l_bovin ame: full=60s ribosomal protein l3-like	F:structural constituent of ribosome, P:translation, C:ribosome, C:intracellular	sp|O16797|RL3_DROME	ENSDARP00000003700	ENSP00000389493	ENSXETP00000015108	ENSGACP00000019268	ENSORLP00000001822	ENSDARP00000003700	ENSTRUP00000000301	ENSTNIP00000014205	ENSBTAP00000012541	ENSMUSP00000080354	FBpp0291741	ENSCSAVP00000001151	F13B10.2d.2		ENSBTAT00000004188	3.00E-30	ENST00000417615	3.00E-31	ENSXETT00000015712	2.00E-31	ENSGACT00000015765	5.00E-33	ENSORLT00000001823	1.00E-26	ENSDART00000011251	4.00E-31
824	AS_rud_dec_c11896	0.037784364	2.12E-01	0.31458735	0.019454088	0.18884963	32	0.024217687	0.004185941	0.015052154	4.878936429630580E-01	0.4848684	4.3979E-06	0.5151316	0.639447706	gene824	AS_rud_dec_c11896	prolyl endopeptidase- partial		gallus gallus prolyl endopeptidase mrna	ppce_mouse ame: full=prolyl endopeptidase short=pe ame: full=post-proline cleaving enzyme	F:serinetype endopeptidase activity, F:metalloendopeptidase activity, F:peptide binding, P:proteolysis, C:nucleus, C:cytosol, F:zinc ion binding, C:mitochondrion	sp|Q9QUR6|PPCE_MOUSE	ENSDARP00000103810	ENSP00000358106	ENSXETP00000029154	ENSGACP00000012383	ENSORLP00000016213	ENSDARP00000103810	ENSTRUP00000020138	ENSTNIP00000015269	ENSBTAP00000021658	ENSMUSP00000097444	FBpp0079637	ENSCSAVP00000013827	R11E3.8.1		ENSBTAT00000021658	7.00E-52	ENST00000369110	1.00E-44	ENSXETT00000029154	4.00E-73	ENSGACT00000012407	7.00E-20	ENSORLT00000016214	3.00E-36	ENSDART00000064387	7.00E-36
827	rud_dec_c2811	0.3349824	5.89E-01	0.3707534	0.34821802	0.07940453	32	0.026952381	0.025011338	0.008761905	1.513192206061830E-03	0.9689703	8.78885E-06	0.0310297	0.060710043	gene827	rud_dec_c2811	antisecretory factor-like protein		pinctada fucata mrna for antisecretory factor-like complete cds	psmd4_bovin ame: full=26s proteasome non-atpase regulatory subunit 4 ame: full=26s proteasome regulatory subunit rpn10	P:DNA repair, C:proteasome complex, P:regulation of transcription, F:zinc ion binding	sp|Q58DA0|PSMD4_BOVIN	ENSDARP00000003398	ENSP00000413038	ENSXETP00000043319	ENSGACP00000005782	ENSORLP00000000389	ENSDARP00000094839	ENSTRUP00000023323	ENSTNIP00000020716	ENSBTAP00000008019	ENSMUSP00000114545	FBpp0078024	ENSCSAVP00000007894			ENSBTAT00000046341	1.00E-10
828	new_rud_dec_rep_c41304	0.2619348	5.29E-01	0.8826088	0.06084142	0.94197035	32	0.046095238	0.00831746	0.047714286	1.453682465941020E-01	0.7030015	6.37643E-06	0.2969985	0.41221537	gene828	new_rud_dec_rep_c41304
829	AS_rud_dec_c19759	0.054345746	2.52E-01	0.033836115	0.8369662	0.2757809	32	0.007070295	0.044303855	0.019614512	4.095549040721090E+00	0.04299626	3.89989E-07	0.95700374	0.97540936	gene829	AS_rud_dec_c19759	low quality protein: midasin-like			mdn1_human ame: full=midasin ame: full=midas-containing protein	F:unfolded protein binding, F:ATP binding, F:ATPase activity, P:protein complex assembly, P:regulation of protein complex assembly, F:nucleotide binding, C:nucleus	sp|Q9NU22|MDN1_HUMAN	ENSDARP00000018762	ENSP00000413970	ENSXETP00000049238	ENSGACP00000008240	ENSORLP00000022427	ENSDARP00000025022	ENSTRUP00000013273	ENSTNIP00000008970	ENSBTAP00000002157	ENSMUSP00000071569	FBpp0083947
830	rud_dec_c17223	0.94151837	9.62E-01	0.94792235	0.6718478	0.7860623	32	0.048358277	0.038585034	0.041356009	8.162406864471440E-04	0.9772076	8.86356E-06	0.0227924	0.094987004	gene830	rud_dec_c17223	PREDICTED: d4-like [Saccoglossus kowalevskii]			samd1_human ame: full=atherin ame: full=sterile alpha motif domain-containing protein 1 short=sam domain-containing protein 1	C:cytoplasm, C:extracellular region	sp|Q6SPE9|SAMD1_RABIT	ENSDARP00000099292	ENSP00000431971	ENSXETP00000038718	ENSGACP00000013812	ENSORLP00000008810	ENSDARP00000014581	ENSTRUP00000032403	ENSTNIP00000013351	ENSBTAP00000003798	ENSMUSP00000092853	FBpp0072159
831	rud_dec_c7759	0.090636946	3.24E-01	0.06292819	0.18839264	0.82432735	32	0.009741497	0.016820862	0.042988662	5.935416249649270E-01	0.4410529	4.00048E-06	0.5589471	0.678404964	gene831	rud_dec_c7759			venerupis decussatus partial srp54 gene for signal recognition particle 54-kda clone exons a-b
832	rud_dec_c38934	0.09962322	3.40E-01	0.52659273	0.52855504	0.039040025	32	0.033396825	0.033006803	0.005659864	1.243965597380560E+00	0.2647082	2.40098E-06	0.7352918	0.823105668	gene832	rud_dec_c38934	selenium binding protein isoform cra_b	C:cytoplasm, F:protein binding	mus musculus selenium binding protein mrna (cdna clone mgc:18519 image:4209393) complete cds	sbp1a_xenla ame: full=selenium-binding protein 1-a	C:cytoplasm, P:transport	sp|Q52KZ7|SBP1A_XENLA	ENSDARP00000035324	ENSP00000408263	ENSXETP00000044773	ENSGACP00000004203	ENSORLP00000025818	ENSDARP00000098327	ENSTRUP00000018985	ENSTNIP00000005508	ENSBTAP00000010644	ENSMUSP00000088349	FBpp0082183	ENSCSAVP00000001545	Y37A1B.5a						ENSXETT00000044773	5.00E-12
833	rud_dec_c30076	0.55806434	7.44E-01	0.2635126	0.5452604	0.7698338	32	0.021573696	0.033795918	0.040621315	8.770736677661260E-04	0.9763738	8.856E-06	0.0236262	0.089433929	gene833	rud_dec_c30076	PREDICTED: hypothetical protein [Strongylocentrotus purpuratus]		saccoglossus kowalevskii radial spoke 3 homolog mrna	rsph3_bovin ame: full=radial spoke head protein 3 homolog ame: full=radial spoke head-like protein 2		sp|A8E4N3|RSPH3_BOVIN	ENSDARP00000107627	ENSP00000252655	ENSXETP00000021540	ENSGACP00000013213		ENSDARP00000094171	ENSTRUP00000045997	ENSTNIP00000013672	ENSBTAP00000007814	ENSMUSP00000111420									ENSXETT00000021540	2.00E-16	ENSGACT00000013238	1.00E-12			ENSDART00000128823	2.00E-14
836	rud_dec_c188	0.026017725	1.79E-01	0.047143377	0.013860517	0.026351107	32	0.00831746	0.003337868	0.004321995	8.438173642275610E-04	0.9768259	8.8601E-06	0.0231741	0.092453168	gene836	rud_dec_c188	protein mak16 homolog b-like		esox lucius clone eluc-evq-523-126 mak16-like protein rbm13 complete cds	mak16_human ame: full=protein mak16 homolog ame: full=nnp78 ame: full=protein rbm13	C:nucleolus	sp|Q9BXY0|MAK16_HUMAN	ENSDARP00000124336	ENSP00000353246	ENSXETP00000035979	ENSGACP00000001397	ENSORLP00000023769	ENSDARP00000098580	ENSTRUP00000029161	ENSTNIP00000022067	ENSBTAP00000044825	ENSMUSP00000033983	FBpp0071198	ENSCSAVP00000010008	C16A3.6	ENSCINP00000014821	ENSBTAT00000047639	8.00E-73	ENST00000360128	5.00E-77	ENSXETT00000035979	1.00E-57	ENSGACT00000001398	7.00E-48	ENSORLT00000023770	4.00E-50	ENSDART00000113837	1.00E-60
838	rud_dec_c16752	0.12736398	3.80E-01	0.03221266	0.15346007	0.21585351	32	0.006879819	0.014770975	0.016444444	1.540971169106340E-03	0.9686869	8.78628E-06	0.0313131	0.059913956	gene838	rud_dec_c16752							ENSDARP00000101637
840	rud_dec_rep_c12145	0.002665501	5.99E-02	0.007704518	0.001377984	0.020298459	32	0.00322449	0.000829932	0.003678005	3.205219697974820E-04	0.9857161	8.94074E-06	0.0142839	0.182658271	gene840	rud_dec_rep_c12145	dnaj homolog subfamily a member 2-like		gallus gallus subfamily member 2 mrna	dnja2_bovin ame: full= homolog subfamily a member 2 flags: precursor	F:metal ion binding, P:protein folding, F:heat shock protein binding, F:ATP binding, F:unfolded protein binding, C:membrane, P:response to heat	sp|O35824|DNJA2_RAT	ENSDARP00000028641	ENSP00000314030	ENSXETP00000053687	ENSGACP00000017001	ENSORLP00000018898	ENSDARP00000028641	ENSTRUP00000023765	ENSTNIP00000014850	ENSBTAP00000004890	ENSMUSP00000034138	FBpp0082223	ENSCSAVP00000006427	T05C3.5.2	ENSCINP00000018243	ENSBTAT00000004890	3.00E-44	ENST00000317089	2.00E-43	ENSXETT00000053687	4.00E-36	ENSGACT00000019701	7.00E-39	ENSORLT00000018899	3.00E-30	ENSDART00000018735	1.00E-32
841	rud_dec2_c1639	0.7074398	8.28E-01	0.3054586	0.93022156	0.5246419	32	0.023768707	0.047573696	0.030861678	1.455863920682530E-03	0.9695635	8.79423E-06	0.0304365	0.061969254	gene841	rud_dec2_c1639			ruditapes philippinarum srp54 intron isolate ai16
843	rud_dec_c5692	0.605405	7.73E-01	0.19813354	0.9818549	0.938473	32	0.018145125	0.049401361	0.047546485	1.467418839183660E-03	0.969443	8.79313E-06	0.030557	0.061679145	gene843	rud_dec_c5692	hypothetical protein BRAFLDRAFT_124674 [Branchiostoma floridae]						ENSDARP00000102784
845	rud_dec_c31684	0.020321844	1.59E-01	0.027097855	0.29489848	0.06554381	32	0.006172336	0.02246712	0.007795918	7.774038965969220E-01	0.3779363	3.42799E-06	0.6220637	0.731726408	gene845	rud_dec_c31684	atp-dependent rna helicase dbp9		xenopus tropicalis dead (asp-glu-ala-asp) box polypeptide 56 mrna	ddx56_mouse ame: full=probable atp-dependent rna helicase ddx56 ame: full=atp-dependent 61 kda nucleolar rna helicase ame: full=dead box protein 56	F:nucleic acid binding, C:nucleolus, P:ribosome biogenesis, F:nucleotide binding, F:helicase activity, P:cellular metabolic process	sp|Q3SZ40|DDX56_BOVIN	ENSDARP00000035846	ENSP00000393488	ENSXETP00000041201	ENSGACP00000001106	ENSORLP00000001771	ENSDARP00000035846	ENSTRUP00000047707	ENSTNIP00000016592	ENSBTAP00000014014	ENSMUSP00000122368	FBpp0076917	ENSCSAVP00000019188	C24H12.4a	ENSCINP00000010676	ENSBTAT00000014014	5.00E-12			ENSXETT00000063273	8.00E-35			ENSORLT00000001772	2.00E-09	ENSDART00000034555	2.00E-26
847	rud_dec_c18385	0.27609104	5.42E-01	0.6203551	0.052928634	0.5041937	32	0.037038549	0.007673469	0.029918367	2.382911225140560E-05	0.9961051	9.03497E-06	0.0038949	0.442613224	gene847	rud_dec_c18385	hypothetical protein BRAFLDRAFT_113722 [Branchiostoma floridae]		saccoglossus kowalevskii cwc25 spliceosome-associated protein homolog mrna	cwc25_human ame: full=pre-mrna-splicing factor cwc25 homolog ame: full=coiled-coil domain-containing protein 49 ame: full=spliceosome-associated protein homolog cwc25		sp|Q9NXE8|CWC25_HUMAN	ENSDARP00000091697	ENSP00000225428	ENSXETP00000051179	ENSGACP00000023986	ENSORLP00000023215	ENSDARP00000027411	ENSTRUP00000011051	ENSTNIP00000017153	ENSBTAP00000034722	ENSMUSP00000018685	FBpp0077396	ENSCSAVP00000007502	F52C9.7.1
848	AS_rud_dec_c17784	0.29535323	5.60E-01	0.23822464	0.23232825	0.7924491	32	0.020185941	0.019274376	0.041614512	3.731655572408950E-01	0.5412838	4.9096E-06	0.4587162	0.584828669	gene848	AS_rud_dec_c17784	transmembrane protein 77			dram2_human ame: full=dna damage-regulated autophagy modulator protein 2 ame: full=transmembrane protein 77	P:induction of apoptosis, C:lysosome	sp|Q6UX65|DRAM2_HUMAN	ENSDARP00000096675	ENSP00000286692	ENSXETP00000054330	ENSGACP00000005441	ENSORLP00000019611	ENSDARP00000096675	ENSTRUP00000031077	ENSTNIP00000004781	ENSBTAP00000052570	ENSMUSP00000118686	FBpp0070359	ENSCSAVP00000012850	C33A11.2	ENSCINP00000025623
849	rud_dec2_c1689	0.6502335	7.95E-01	0.59774053	0.2226171	0.75465274	32	0.036204082	0.018684807	0.039981859	1.494344020784410E-03	0.9691641	8.7906E-06	0.0308359	0.061188862	gene849	rud_dec2_c1689	hypothetical protein BRAFLDRAFT_203438 [Branchiostoma floridae]		strongylocentrotus purpuratus domain containing mrna	trabd_bovin ame: full= domain-containing protein		sp|Q58DF3|TRABD_BOVIN	ENSDARP00000015662	ENSP00000379173	ENSXETP00000048193	ENSGACP00000017788	ENSORLP00000020444	ENSDARP00000015662	ENSTRUP00000011722	ENSTNIP00000011196	ENSBTAP00000002512	ENSMUSP00000131228	FBpp0082185	ENSCSAVP00000018555	F38A5.2a	ENSCINP00000012765
850	AS_rud_dec_c36333	0.8656942	9.18E-01	0.5539946	0.6681565	0.84249	32	0.034553288	0.038439909	0.043659864	1.393129951622990E-03	0.9702261	8.80024E-06	0.0297739	0.063468903	gene850	AS_rud_dec_c36333	hypothetical protein BRAFLDRAFT_214970 [Branchiostoma floridae]	F:nucleosidetriphosphatase activity, P:auxin biosynthetic process, F:nucleotide binding	monodelphis domestica methylmalonic aciduria (cobalamin deficiency) cbla type mrna	mmaa_human ame: full=methylmalonic aciduria type a mitochondrial flags: precursor	F:amino acid transmembrane transporter activity, P:transmembrane transport, F:ATP binding, P:amino acid transport, C:integral to membrane, F:nucleosidetriphosphatase activity, C:mitochondrion	sp|Q8IVH4|MMAA_HUMAN	ENSDARP00000079456	ENSP00000281317	ENSXETP00000051110	ENSGACP00000022750	ENSORLP00000009252	ENSDARP00000079456	ENSTRUP00000036795	ENSTNIP00000020871	ENSBTAP00000029802	ENSMUSP00000048826			T02G5.13b.2		ENSBTAT00000029806	5.00E-44			ENSXETT00000051110	7.00E-48	ENSGACT00000022793	2.00E-29			ENSDART00000085021	3.00E-37
851	rud_dec_c1117	0.05734446	2.57E-01	0.4548162	0.42931134	0.007099867	32	0.030498866	0.028743764	0.001764172	1.654438713103440E-04	0.9897375	8.97721E-06	0.0102625	0.255357872	gene851	rud_dec_c1117	ribosomal protein rpl7a	C:ribosome, P:ribosome biogenesis	lepidochitona cinerea ribosomal protein l7a partial cds	rl7a_fugru ame: full=60s ribosomal protein l7a ame: full=surfeit locus protein 3	C:ribosome, P:ribosome biogenesis	sp|O57592|RL7A_TAKRU	ENSDARP00000010055	ENSP00000416789	ENSXETP00000010943	ENSGACP00000021089	ENSORLP00000004954	ENSDARP00000010055	ENSTRUP00000047076	ENSTNIP00000010310	ENSBTAP00000015358	ENSMUSP00000133067	FBpp0070878	ENSCSAVP00000014287	Y24D9A.4a		ENSBTAT00000015358	5.00E-33	ENST00000412126	6.00E-28	ENSXETT00000010943	6.00E-44			ENSORLT00000004955	7.00E-42	ENSDART00000004238	6.00E-35
852	rud_dec2_c1043	0.5945887	7.67E-01	0.2155996	0.6590675	0.9504405	32	0.019106576	0.038095238	0.048077098	1.844953560635070E-03	0.9657391	8.75954E-06	0.0342609	0.056867625	gene852	rud_dec2_c1043	zinc finger in n-recognin family protein	F:zinc ion binding, F:ubiquitinprotein ligase activity					ENSDARP00000082641			ENSGACP00000012292	ENSORLP00000019379
853	rud_dec_c21468	0.21951559	4.88E-01	0.50362206	0.3798345	0.0389243	32	0.032385488	0.026594104	0.005650794	5.175129655867740E-04	0.9818506	8.90567E-06	0.0181494	0.131966251	gene853	rud_dec_c21468	endo- -beta-d-glucanase		tapes literata endo- -beta-d-glucanase complete cds	bgbp_penmo ame: full=beta- -glucan-binding protein short=gbp flags: precursor	F:hydrolase activity. hydrolyzing Oglycosyl compounds, P:carbohydrate metabolic process	sp|Q9NL89|BGBP_BOMMO											FBpp0074863	ENSCSAVP00000003773
854	AS_rud_dec_rep_c10401	0.15438868	4.14E-01	0.035652485	0.9953152	0.87037987	32	0.007269841	0.049845805	0.044716553	2.413907626794290E-02	0.8765316	7.9504E-06	0.1234684	0.18947406	gene854	AS_rud_dec_rep_c10401	cg3621 cg3621-pa		xenopus tropicalis nadh dehydrogenase 1 alpha subcomplex subunit 7-like mrna	ndua7_bovin ame: full=nadh dehydrogenase 1 alpha subcomplex subunit 7 ame: full=complex i- short=ci- ame: full=nadh-ubiquinone oxidoreductase subunit	P:mitochondrial electron transport. NADH to ubiquinone, C:mitochondrial inner membrane, F:oxidoreductase activity	sp|Q05752|NDUA7_BOVIN	ENSDARP00000053284	ENSP00000301457		ENSGACP00000011396	ENSORLP00000009949	ENSDARP00000053284	ENSTRUP00000022071	ENSTNIP00000003205	ENSBTAP00000003199	ENSMUSP00000039692	FBpp0070370	ENSCSAVP00000002083	F45H10.3.1	ENSCINP00000024567
855	rud_dec2_rep_c3225	0.49947184	7.07E-01	0.20572437	0.427346	0.9393879	32	0.018557823	0.028657596	0.047587302	6.968008811418250E-02	0.7918031	7.18189E-06	0.2081969	0.303485114	gene855	rud_dec2_rep_c3225	ribosomal protein s13	C:ribosome, F:structural constituent of ribosome, P:translation	argopecten irradians isolate iolsaicl153ct179cn190 ribosomal protein s13 complete cds	rs13_human ame: full=40s ribosomal protein s13	F:mRNA binding, C:nucleolus, F:structural constituent of ribosome, P:translational elongation, C:cytosolic small ribosomal subunit, P:negative regulation of RNA splicing, F:protein binding	sp|P62278|RS13_RAT	ENSDARP00000052729	ENSP00000435777	ENSXETP00000055787	ENSGACP00000008915	ENSORLP00000001582	ENSDARP00000052729	ENSTRUP00000038257	ENSTNIP00000005673	ENSBTAP00000052105	ENSMUSP00000082124	FBpp0079328	ENSCSAVP00000007664	C16A3.9.2		ENSBTAT00000055693	6.00E-76	ENST00000525634	2.00E-78	ENSXETT00000055787	3.00E-40	ENSGACT00000008935	8.00E-99	ENSORLT00000001583	4.00E-89	ENSDART00000052730	6.00E-91
856	rud_dec_c2154	0.17160155	4.36E-01	0.33868983	0.65841866	0.13543828	32	0.025405896	0.038058957	0.012163265	7.483840619215690E-05	0.9930977	9.00769E-06	0.0069023	0.342720959	gene856	rud_dec_c2154	fibroblast growth factor receptor	F:kinase activity		fgfr3_chick ame: full=fibroblast growth factor receptor 3 short=fgfr-3 ame: full=tyrosine kinase receptor cek2 flags: precursor	C:cell part, P:positive regulation of cellular process, P:developmental process	sp|P18460|FGFR3_CHICK	ENSDARP00000069743	ENSP00000311337	ENSXETP00000036588	ENSGACP00000020469	ENSORLP00000000391	ENSDARP00000069753	ENSTRUP00000047713	ENSTNIP00000016596	ENSBTAP00000009427	ENSMUSP00000106253	FBpp0100143	ENSCSAVP00000012876	F58A3.2b.4
857	newAS_rud_dec_c22494	0.4140022	6.52E-01	0.2591232	0.49304286	0.49722517	32	0.021333333	0.03154195	0.029569161	5.092200557328390E-04	0.9819965	8.907E-06	0.0180035	0.133100322	gene857	newAS_rud_dec_c22494			venerupis decussata satellite vde83d sequence
860	rud_dec_c11199	0.07818293	3.02E-01	0.48002395	0.023354804	0.918813	32	0.031473923	0.004689342	0.046770975	1.466164058222370E+00	0.2259519	2.04945E-06	0.7740481	0.853147906	gene860	rud_dec_c11199	alpha-catenin [Parasteatoda tepidariorum]		danio rerio catenin (cadherin-associated protein) alpha 2 mrna	ctna2_danre ame: full=catenin alpha-2 ame: full=alpha n-catenin	C:cell projection, C:cytoplasm, P:multicellular organismal development, P:cell adhesion, C:cell junction, P:cell differentiation, F:cadherin binding, C:actin cytoskeleton	sp|B7ZC77|CTNA2_DANRE	ENSDARP00000092080	ENSP00000362849	ENSXETP00000018423	ENSGACP00000023764	ENSORLP00000007636	ENSDARP00000092080	ENSTRUP00000006662	ENSTNIP00000009929	ENSBTAP00000018863	ENSMUSP00000074606	FBpp0070037		R13H4.4a	ENSCINP00000018199	ENSBTAT00000044898	2.00E-16	ENST00000361291	8.00E-31	ENSXETT00000051696	7.00E-35	ENSGACT00000024377	1.00E-31	ENSORLT00000009024	6.00E-29	ENSDART00000101306	5.00E-40
861	rud_dec_c40047	0.8642314	9.17E-01	0.43411124	0.90767366	0.60850734	32	0.029564626	0.046816327	0.034240363	1.516171442176520E-03	0.9689398	8.78857E-06	0.0310602	0.060629818	gene861	rud_dec_c40047	iron regulatory protein	P:metabolic process	xenopus tropicalis aconitase soluble mrna	acoc_chick ame: full=cytoplasmic aconitate hydratase short=aconitase ame: full=citrate hydro-lyase ame: full=iron-responsive element-binding protein 1 short=ire-bp 1	F:metal ion binding, P:citrate metabolic process, P:response to iron(II) ion, F:ironresponsive element binding, C:Golgi apparatus, F:protein binding, P:tricarboxylic acid cycle, F:4 iron. 4 sulfur cluster binding, F:aconitate hydratase activity, C:cytosol, C:endoplasmic reticulum	sp|Q01059|ACOC_RABIT	ENSDARP00000045252	ENSP00000369255	ENSXETP00000020189	ENSGACP00000002197	ENSORLP00000025589	ENSDARP00000045252	ENSTRUP00000016904	ENSTNIP00000007967	ENSBTAP00000000731	ENSMUSP00000030112	FBpp0083720	ENSCSAVP00000019947	ZK455.1.1	ENSCINP00000019424	ENSBTAT00000000731	7.00E-43	ENST00000379923	4.00E-55	ENSXETT00000020189	6.00E-56	ENSGACT00000002203	6.00E-37			ENSDART00000045253	8.00E-52
862	rud_dec_c32722	0.048095558	2.39E-01	0.7477866	0.81470925	0.016315827	32	0.041365079	0.043659864	0.003106576	6.631537363316510E-01	0.4154488	3.76824E-06	0.5845512	0.701525082	gene862	rud_dec_c32722	PREDICTED: similar to NIR2 [Strongylocentrotus purpuratus]		ciona intestinalis ga10766-pa mrna	pitm1_mouse ame: full=membrane-associated phosphatidylinositol transfer protein 1 ame: full=drosophila retinal degeneration b homolog 1 short= 1 ame: full=mpt-1 ame: full=phosphatidylinositol transfer membrane-associated 1 short=pitpnm 1 ame: full=pyk2 n-terminal domain-interacting receptor 2 short=nir-2	C:membrane, P:protein transport, F:metal ion binding, C:endoplasmic reticulum, F:phospholipid binding, C:Golgi apparatus, C:lipid particle	sp|O35954|PITM1_MOUSE	ENSDARP00000060193	ENSP00000348772	ENSXETP00000003346	ENSGACP00000010922	ENSORLP00000007807	ENSDARP00000060193	ENSTRUP00000024217	ENSTNIP00000002699	ENSBTAP00000013851	ENSMUSP00000097599	FBpp0073654	ENSCSAVP00000001687	M01F1.7	ENSCINP00000022285					ENSXETT00000061540	2.00E-09	ENSGACT00000010945	3.00E-07
863	rud_dec_c19424	0.6601598	8.00E-01	0.27083182	0.8694908	0.82468945	32	0.022	0.045455782	0.043011338	1.536278229423260E-03	0.9687346	8.78671E-06	0.0312654	0.060041551	gene863	rud_dec_c19424							ENSDARP00000103873			ENSGACP00000000427		ENSDARP00000006402
865	AS_rud_dec2_c576	0.2698963	5.38E-01	0.4046957	0.06910314	0.8445189	32	0.028430839	0.008911565	0.043755102	5.072030587240300E-01	0.4763521	4.32065E-06	0.5236479	0.646886787	gene865	AS_rud_dec2_c576	methylmalonic aciduria (cobalamin deficiency) cbld with homocystinuria		Xenopus tropicalis hypothetical protein LOC549485. mRNA (cDNA clone MGC:121822 IMAGE:7637704). complete cds	mmad_chick ame: full=methylmalonic aciduria and homocystinuria type d mitochondrial flags: precursor	C:mitochondrion	sp|Q5ZKP2|MMAD_CHICK	ENSDARP00000018012	ENSP00000389060	ENSXETP00000009814	ENSGACP00000001837	ENSORLP00000024738	ENSDARP00000018012	ENSTRUP00000038372	ENSTNIP00000009491	ENSBTAP00000021223	ENSMUSP00000099830		ENSCSAVP00000019185	Y76A2B.5.1	ENSCINP00000023499					ENSXETT00000062291	1.00E-13
868	AS_rud_dec_c18697	0.35265154	6.05E-01	0.5658054	0.14900392	0.41280755	32	0.035038549	0.01444898	0.025904762	9.342285156574230E-01	0.3337666	3.02736E-06	0.6662334	0.768752305	gene868	AS_rud_dec_c18697	alkaline phosphatase	F:hydrolase activity	strongylocentrotus purpuratus hypothetical loc584464 mrna	ppbt_chick ame: full=alkaline tissue-nonspecific isozyme short=ap-tnap short=tnsalp flags: precursor	F:metal ion binding, F:alkaline phosphatase activity, P:response to antibiotic, P:metabolic process, F:hydrolase activity, C:anchored to membrane, P:response to vitamin D, C:plasma membrane	sp|Q92058|PPBT_CHICK	ENSDARP00000019098	ENSP00000394765	ENSXETP00000050243	ENSGACP00000011823	ENSORLP00000011878	ENSDARP00000019098	ENSTRUP00000022109	ENSTNIP00000002486	ENSBTAP00000022731	ENSMUSP00000027455	FBpp0099962	ENSCSAVP00000015875		ENSCINP00000000365							ENSGACT00000011847	6.00E-06
869	rud_dec_c3684	0.2704604	5.38E-01	0.14618048	0.92846394	0.11678451	32	0.015292517	0.04752381	0.011038549	1.266888389181980E-03	0.9716066	8.81276E-06	0.0283934	0.067496323	gene869	rud_dec_c3684	c19orf56 protein	C:integral to membrane	ictalurus punctatus upf0139 membrane protein c19orf56-like protein mrna	cs056_bovin ame: full=upf0139 membrane protein c19orf56 homolog	C:integral to membrane	sp|Q6ZWX0|CS056_MOUSE	ENSDARP00000119631	ENSP00000222190	ENSXETP00000054813	ENSGACP00000026184	ENSORLP00000024921	ENSDARP00000094050	ENSTRUP00000018060	ENSTNIP00000009071	ENSBTAP00000008194	ENSMUSP00000078697	FBpp0076884	ENSCSAVP00000014495	K10B2.4	ENSCINP00000015414	ENSBTAT00000008194	4.00E-41	ENST00000222190	4.00E-43	ENSXETT00000054813	2.00E-44	ENSGACT00000026235	4.00E-40	ENSORLT00000024922	5.00E-51	ENSDART00000132491	2.00E-42
870	rud_dec_c27449	0.2227698	4.91E-01	0.05229611	0.28440544	0.2788595	32	0.008857143	0.021977324	0.019714286	1.601818896460820E-03	0.968075	8.78073E-06	0.031925	0.058661323	gene870	rud_dec_c27449			venerupis decussatus epic-pcr fragment clone c7
871	rud_dec_c1784	0.021412415	1.63E-01	0.5961803	0.057233762	0.09081183	32	0.036163265	0.007968254	0.009482993	2.523877057077120E+00	0.1121346	1.01709E-06	0.8878654	0.931912046	gene871	rud_dec_c1784			rattus norvegicus ch230-129d21 (children s hospital oakland research institute rat (bn sd mcw) bac library) complete sequence
874	new_rud_dec_c32245	0.2298522	4.99E-01	0.049441084	0.53413147	0.24119811	32	0.008562358	0.033251701	0.017786848	1.447290535452330E-03	0.9696532	8.79504E-06	0.0303468	0.062130902	gene874	new_rud_dec_c32245
875	rud_dec_c4612	0.06348117	2.71E-01	0.018292015	0.9552734	0.10143943	32	0.004970522	0.048517007	0.010136054	4.172991759787690E-04	0.983702	8.92247E-06	0.016298	0.149586057	gene875	rud_dec_c4612	adenylate kinase 7		strongylocentrotus purpuratus adenylate kinase 7 mrna	kad7_mouse ame: full=adenylate kinase 7	P:cell projection organization, F:ATP binding, F:adenylate kinase activity, P:nucleobase. nucleoside. nucleotide and nucleic acid metabolic process	sp|Q9D2H2|KAD7_MOUSE	ENSDARP00000074479	ENSP00000267584	ENSXETP00000030477	ENSGACP00000017290	ENSORLP00000013694	ENSDARP00000074479	ENSTRUP00000020188	ENSTNIP00000008947	ENSBTAP00000053188	ENSMUSP00000043145		ENSCSAVP00000005358													ENSDART00000080029	8.00E-14
876	AS_rud_dec2_c1780	0.015521407	1.39E-01	0.002503079	0.52068543	0.053184934	32	0.001904762	0.032639456	0.006843537	1.707298855592390E-03	0.9670412	8.77135E-06	0.0329588	0.057294567	gene876	AS_rud_dec2_c1780	hypothetical protein NEMVEDRAFT_v1g9429 [Nematostella vectensis]			gp2_rat ame: full=pancreatic secretory granule membrane major glycoprotein gp2 ame: full=glycoprotein 80 short=gp80 ame: full=pancreatic zymogen granule membrane protein gp-2 flags: precursor	C:cytoplasm, C:anchored to membrane, C:plasma membrane	sp|P19218|GP2_RAT	ENSDARP00000100005	ENSP00000370767	ENSXETP00000009547	ENSGACP00000006886		ENSDARP00000102056	ENSTRUP00000033851		ENSBTAP00000008217	ENSMUSP00000033255
878	newAS_rud_dec_c36225	0.023375737	1.69E-01	0.69089746	0.57093453	0.007714967	32	0.039410431	0.034902494	0.001863946	3.819753828793180E-05	0.9950688	9.02557E-06	0.0049312	0.388261554	gene878	newAS_rud_dec_c36225																															ENSDART00000075643	0.000002
879	AS_rud_dec_c3911	0.24553819	5.14E-01	0.5496369	0.11097071	0.27871165	32	0.034385488	0.011972789	0.019709751	9.640427158449820E-01	0.3261704	2.95846E-06	0.6738296	0.774436835	gene879	AS_rud_dec_c3911	wing morphogenesis defect-like		nasonia vitripennis serine-threonine kinase receptor-associated protein mrna	strap_chick ame: full=serine-threonine kinase receptor-associated protein	C:spliceosomal complex, P:negative regulation of transforming growth factor beta receptor signaling pathway, P:RNA splicing, P:negative regulation of transcription from RNA polymerase II promoter, F:receptor binding, P:mRNA processing, C:cytoplasm	sp|Q5ZL33|STRAP_CHICK	ENSDARP00000024391	ENSP00000392270	ENSXETP00000048763	ENSGACP00000001458	ENSORLP00000012490	ENSDARP00000024391	ENSTRUP00000027899	ENSTNIP00000010039	ENSBTAP00000018840	ENSMUSP00000068267	FBpp0072023	ENSCSAVP00000002615	Y74C10AR.1	ENSCINP00000000933	ENSBTAT00000018840	4.00E-33	ENST00000419869	4.00E-41	ENSXETT00000048763	7.00E-30	ENSGACT00000001459	1.00E-27	ENSORLT00000012493	2.00E-28	ENSDART00000013224	3.00E-37
882	rud_dec_c28089	0.40377086	6.46E-01	0.4133979	0.108150005	0.6310415	32	0.02877551	0.011777778	0.03507483	2.019198689708900E-04	0.9886626	8.96746E-06	0.0113374	0.232722831	gene882	rud_dec_c28089	hypothetical protein BRAFLDRAFT_91524 [Branchiostoma floridae]		Branchiostoma floridae hypothetical protein. mRNA	mgt5a_mouse ame: full=alpha- -mannosylglycoprotein 6-beta-n-acetylglucosaminyltransferase a ame: full=alpha-mannoside beta- -n-acetylglucosaminyltransferase ame: full= c-t v short=gnt-v ame: full=mannoside acetylglucosaminyltransferase 5 ame: full=n-acetylglucosaminyl-transferase v	P:protein amino acid Nlinked glycosylation, F:acetylglucosaminyltransferase activity	sp|Q08834|MGT5A_RAT	ENSDARP00000096566	ENSP00000281923	ENSXETP00000001105	ENSGACP00000019705	ENSORLP00000005463	ENSDARP00000096566	ENSTRUP00000031166	ENSTNIP00000009806	ENSBTAP00000053618	ENSMUSP00000129166		ENSCSAVP00000009371	C55B7.2	ENSCINP00000004438											ENSDART00000126107	3.00E-07
884	rud_dec_c12668	0.91097665	9.44E-01	0.9436446	0.8345914	0.50729203	32	0.048240363	0.044240363	0.030058957	1.655455424042880E-03	0.9675452	8.77592E-06	0.0324548	0.057785376	gene884	rud_dec_c12668	5 -amp-activated protein kinase subunit beta-2-like		acyrthosiphon pisum clone: full-insert cdna sequence based on ests (5 -est: 3 -est aci2aac1ye18bbm1)	aakb1_bovin ame: full=5 -amp-activated protein kinase subunit beta-1 short=ampk subunit beta-1 short=ampkb	P:fatty acid biosynthetic process, F:protein binding, C:nucleus	sp|Q5BIS9|AAKB1_BOVIN	ENSDARP00000064865	ENSP00000229328	ENSXETP00000022470	ENSGACP00000016750	ENSORLP00000022999	ENSDARP00000064865	ENSTRUP00000028132	ENSTNIP00000018364	ENSBTAP00000007798	ENSMUSP00000107630	FBpp0087705	ENSCSAVP00000003558	F55F3.1.1		ENSBTAT00000007798	1.00E-21	ENST00000229328	2.00E-15	ENSXETT00000022470	1.00E-26	ENSGACT00000016784	5.00E-20	ENSORLT00000019471	1.00E-27	ENSDART00000045529	5.00E-17
885	rud_dec2_c50	0.14485832	4.02E-01	0.43045807	0.024971439	0.614226	32	0.029419501	0.004879819	0.034426304	1.005936238218220E+00	0.3158784	2.86511E-06	0.6841216	0.782837371	gene885	rud_dec2_c50	mitochondrial import receptor partial		tetraodon nigroviridis full-length cdna	tom22_bovin ame: full=mitochondrial import receptor subunit tom22 homolog ame: full=translocase of outer membrane 22 kda subunit homolog	P:cellular process, C:mitochondrion, C:membrane	sp|Q75Q41|TOM22_RAT	ENSDARP00000066387	ENSP00000216034	ENSXETP00000015087	ENSGACP00000005992	ENSORLP00000003542	ENSDARP00000066387	ENSTRUP00000043491	ENSTNIP00000015908	ENSBTAP00000013405	ENSMUSP00000023062	FBpp0073032	ENSCSAVP00000019641	W10D9.5.1
886	AS_rud_dec_c11239	0.11511499	3.63E-01	0.31559208	0.023301564	0.12984943	32	0.024253968	0.004675737	0.01184127	2.825753807738910E-01	0.5950182	5.39699E-06	0.4049818	0.530368823	gene886	AS_rud_dec_c11239	PREDICTED: similar to F21D5.3 [Hydra magnipapillata]			lac10_arath ame: full=laccase-10 ame: full=benzenediol:oxygen oxidoreductase 10 ame: full=diphenol oxidase 10 ame: full=urishiol oxidase 10 flags: precursor	F:laccase activity	sp|Q2QUN2|LAC24_ORYSJ											FBpp0289199	ENSCSAVP00000004533	F21D5.3.3
887	AS_rud_dec2_c1171	0.54008055	7.33E-01	0.30386296	0.2205374	0.5000899	32	0.023664399	0.018548753	0.029714286	1.707487982571360E-03	0.9670394	8.77133E-06	0.0329606	0.057288662	gene887	AS_rud_dec2_c1171	nip7 protein	C:nucleolus, F:protein binding, P:ribosome assembly	saccoglossus kowalevskii 60s ribosome subunit biogenesis protein nip7 homolog mrna	nip7_rat ame: full=60s ribosome subunit biogenesis protein nip7 homolog ame: full=peachy ame: full=kda93	C:nucleolus, F:protein binding, P:ribosome assembly	sp|Q9WV50|NIP7_RAT	ENSDARP00000076524	ENSP00000254940	ENSXETP00000038700	ENSGACP00000021515	ENSORLP00000014708	ENSDARP00000076524	ENSTRUP00000000555	ENSTNIP00000007313	ENSBTAP00000002182	ENSMUSP00000034392	FBpp0084082	ENSCSAVP00000015591	C43E11.9.1	ENSCINP00000013578	ENSBTAT00000002182	3.00E-38	ENST00000254940	1.00E-32	ENSXETT00000038700	3.00E-50	ENSGACT00000021556	3.00E-31	ENSORLT00000014709	5.00E-34	ENSDART00000082087	4.00E-27
888	rud_dec_c18365	0.6522454	7.96E-01	0.65877676	0.2663694	0.93374926	32	0.03830839	0.020952381	0.047328798	1.115465074121850E-03	0.9733567	8.82863E-06	0.0266433	0.074257673	gene888	rud_dec_c18365	achain solution structure of the chromo domain of mortality factor 4-like protein 1 from human	P:regulation of growth, P:histone H4 acetylation, F:protein Nterminus binding, P:DNA repair, P:histone H2A acetylation, P:regulation of transcription, P:histone deacetylation, C:NuA4 histone acetyltransferase complex, C:Sin3 complex	danio rerio mortality factor 4 like 1 mrna	mo4l1_rat ame: full=mortality factor 4-like protein 1 ame: full=morf-related gene 15 protein ame: full=transcription factor-like protein mrg15	P:regulation of growth, P:histone H4 acetylation, P:DNA repair, P:histone H2A acetylation, P:chromatin assembly or disassembly, P:regulation of transcription, P:histone deacetylation, C:NuA4 histone acetyltransferase complex, C:Sin3 complex, F:chromatin binding	sp|Q6AYU1|MO4L1_RAT	ENSDARP00000112985	ENSP00000408880	ENSXETP00000017126	ENSGACP00000022333	ENSORLP00000008417	ENSDARP00000060318	ENSTRUP00000038534	ENSTNIP00000011271	ENSBTAP00000014581	ENSMUSP00000132020	FBpp0082579	ENSCSAVP00000017617	Y37D8A.9a	ENSCINP00000021890	ENSBTAT00000017023	3.00E-20	ENST00000426013	1.00E-20	ENSXETT00000062594	3.00E-20	ENSGACT00000006904	6.00E-22	ENSORLT00000002559	2.00E-21	ENSDART00000060319	8.00E-24
890	AS_rud_dec_c32353	0.26517195	5.32E-01	0.6701751	0.058959484	0.24395739	32	0.038739229	0.008122449	0.017945578	2.636491786370240E-02	0.8710123	7.90034E-06	0.1289877	0.197175346	gene890	AS_rud_dec_c32353	PREDICTED: similar to GA13644-PA [Nasonia vitripennis]		Branchiostoma floridae hypothetical protein. mRNA	cbp_mouse ame: full=creb-binding protein		sp|P45481|CBP_MOUSE	ENSDARP00000086306	ENSP00000371502	ENSXETP00000022709	ENSGACP00000024794	ENSORLP00000010434	ENSDARP00000081684	ENSTRUP00000032130	ENSTNIP00000009829	ENSBTAP00000005092	ENSMUSP00000079177	FBpp0291863	ENSCSAVP00000010881	R10E11.1b	ENSCINP00000018331	ENSBTAT00000005092	2.00E-25	ENST00000263253	6.00E-27	ENSXETT00000022709	8.00E-36	ENSGACT00000006422	3.00E-34	ENSORLT00000017526	2.00E-36	ENSDART00000091873	8.00E-39
891	AS_rud_dec_c20299	0.75802964	8.56E-01	0.74003065	0.5784978	0.29387358	32	0.041011338	0.035210884	0.020340136	1.825669783613640E-03	0.9659185	8.76117E-06	0.0340815	0.056860962	gene891	AS_rud_dec_c20299	alpha 1-like		apis mellifera arf-gap with dual ph domain-containing protein 1-like mrna	adap1_human ame: full=arf-gap with dual ph domain-containing protein 1 ame: full=centaurin-alpha-1 short=cnt-a1 ame: full= mapk-activating protein pm25	C:cytoplasm, C:nucleolus, C:plasma membrane, P:cell surface receptor linked signaling pathway, F:protein binding, F:inositol 1.3.4.5 tetrakisphosphate binding, P:regulation of GTPase activity, F:ARF GTPase activator activity	sp|O75689|ADAP1_HUMAN	ENSDARP00000094504	ENSP00000265846	ENSXETP00000034877	ENSGACP00000007436	ENSORLP00000012779	ENSDARP00000094504	ENSTRUP00000029696	ENSTNIP00000022000	ENSBTAP00000052975	ENSMUSP00000106489	FBpp0083762	ENSCSAVP00000007963	W09D10.1.3	ENSCINP00000023708
892	AS_rud_dec_c11164	0.74395335	8.48E-01	0.75693834	0.73103154	0.4509037	32	0.041709751	0.040680272	0.027514739	2.941281777109450E-01	0.5875872	5.32959E-06	0.4124128	0.538118643	gene892	AS_rud_dec_c11164	salivary c-type lectin	F:binding, F:sugar binding		plc_halla ame: full=perlucin	F:binding, F:sugar binding	sp|P02707|LECH_CHICK	ENSDARP00000048549	ENSP00000351954	ENSXETP00000001423	ENSGACP00000008102	ENSORLP00000003251	ENSDARP00000048549	ENSTRUP00000035293	ENSTNIP00000002102	ENSBTAP00000044662	ENSMUSP00000119810	FBpp0072553	ENSCSAVP00000005872	K02F3.5	ENSCINP00000020030
893	rud_dec_c7349	0.6080981	7.74E-01	0.5916796	0.30621117	0.7567688	32	0.035968254	0.023024943	0.040049887	6.167772471599160E-04	0.9801866	8.89058E-06	0.0198134	0.115925217	gene893	rud_dec_c7349	set translocation-like		meleagris gallopavo protein set-like mrna	set_rat ame: full=protein set ame: full=liver regeneration-related protein lrrgr00002 ame: full=phosphatase 2a inhibitor i2pp2a short=i-2pp2a ame: full=template-activating factor i short=taf-i	C:cytoplasm, C:intracellular membranebounded organelle	sp|Q63945|SET_RAT	ENSDARP00000008085	ENSP00000361773	ENSXETP00000028114	ENSGACP00000019523	ENSORLP00000015964	ENSDARP00000008085	ENSTRUP00000014636	ENSTNIP00000019833	ENSBTAP00000027913	ENSMUSP00000070002	FBpp0082521	ENSCSAVP00000004552	C27B7.1a	ENSCINP00000000520	ENSBTAT00000030281	2.00E-25	ENST00000372688	5.00E-28	ENSXETT00000015102	1.00E-07	ENSGACT00000024406	1.00E-20	ENSORLT00000007371	1.00E-06	ENSDART00000141641	4.00E-23
894	AS_rud_dec_c11008	0.8090863	8.87E-01	0.5843294	0.8853849	0.4365848	32	0.035678005	0.046063492	0.026888889	1.227030421318880E-03	0.9720566	8.81684E-06	0.0279434	0.068677837	gene894	AS_rud_dec_c11008	hypothetical protein DAPPUDRAFT_303638 [Daphnia pulex]		saccoglossus kowalevskii mitochondrial ribosomal protein l12-like mrna	rm12_human ame: full=39s ribosomal protein mitochondrial short=l12mt short=mrp-l12 ame: full=5c5-2 flags: precursor	C:mitochondrial large ribosomal subunit, F:RNA binding, P:transcription from mitochondrial promoter, F:protein binding, P:positive regulation of transcription. DNAdependent	sp|P52815|RM12_HUMAN	ENSDARP00000056617	ENSP00000333837	ENSXETP00000042649	ENSGACP00000013933	ENSORLP00000008902	ENSDARP00000056617	ENSTRUP00000030462	ENSTNIP00000013345	ENSBTAP00000000534	ENSMUSP00000044417	FBpp0076238		W09D10.3
895	rud_dec_c28035	0.8042261	8.84E-01	0.7720419	0.45859146	0.39150664	32	0.042235828	0.030090703	0.02493424	1.519718871691110E-03	0.9689035	8.78824E-06	0.0310965	0.060465112	gene895	rud_dec_c28035	PREDICTED: hypothetical protein [Saccoglossus kowalevskii]			muden_macfa ame: full=mhd domain-containing death-inducing protein ame: full=mu-2-related death-inducing protein short=	C:clathrin adaptor complex, P:vesiclemediated transport, P:intracellular protein transport, F:protein binding	sp|Q4R6Q7|MUDEN_MACFA	ENSDARP00000117738	ENSP00000409583	ENSXETP00000026220	ENSGACP00000010456	ENSORLP00000020287	ENSDARP00000045881	ENSTRUP00000046475	ENSTNIP00000020520	ENSBTAP00000017337	ENSMUSP00000046536
896	new_rud_dec_c43094	0.020079117	1.58E-01	0.0981742	0.003275361	0.110717975	32	0.01214059	0.001401361	0.010716553	2.285481383523800E-04	0.9879382	8.96089E-06	0.0120618	0.215489824	gene896	new_rud_dec_c43094
897	new_rud_dec_c21486	0.61198986	7.76E-01	0.72442824	0.24807528	0.6289478	32	0.040439909	0.019977324	0.034988662	1.593438695977050E-04	0.9899285	8.97894E-06	0.0100715	0.261835246	gene897	new_rud_dec_c21486			homo sapiens 3-hydroxy-3-methylglutaryl- reductase eqgene on chromosome 5
898	rud_dec_rep_c13827	0.11648501	3.64E-01	0.045014247	0.43362376	0.056071315	32	0.008126984	0.028861678	0.007070295	3.389646793721110E-04	0.985311	8.93706E-06	0.014689	0.175424536	gene898	rud_dec_rep_c13827	GH13312 [Drosophila grimshawi]	F:DNA binding		atf4_rat ame: full=cyclic amp-dependent transcription factor atf-4 short=camp-dependent transcription factor atf-4 ame: full=activating transcription factor 4 short=ratf-4	F:GABA receptor binding, P:regulation of transcription. DNAdependent, F:protein Cterminus binding, F:transcription activator activity, P:response to stress, C:nucleus	sp|Q9ES19|ATF4_RAT	ENSDARP00000055608	ENSP00000379912	ENSXETP00000050104	ENSGACP00000026990	ENSORLP00000013351	ENSDARP00000055608	ENSTRUP00000002884	ENSTNIP00000014442	ENSBTAP00000023213	ENSMUSP00000105234	FBpp0081041	ENSCSAVP00000013910	T04C10.4	ENSCINP00000022333
899	rud_dec2_c934	0.08380036	3.13E-01	0.016528444	0.76455736	0.84425807	32	0.004725624	0.041931973	0.043741497	3.448659531386510E-04	0.9851837	8.93591E-06	0.0148163	0.171915868	gene899	rud_dec2_c934	cathepsin s	P:proteolysis, F:hydrolase activity, F:cysteinetype peptidase activity, F:peptidase activity, F:cysteinetype endopeptidase activity		cats_canfa ame: full=cathepsin s flags: precursor	P:proteolysis, C:lysosome, C:intracellular membranebounded organelle, F:hydrolase activity, C:membrane, F:cysteinetype peptidase activity, F:peptidase activity, F:cysteinetype endopeptidase activity	sp|Q8HY81|CATS_CANFA	ENSDARP00000034094	ENSP00000357981	ENSXETP00000019572	ENSGACP00000005108	ENSORLP00000003916	ENSDARP00000034094	ENSTRUP00000040431	ENSTNIP00000008922	ENSBTAP00000022774	ENSMUSP00000112006	FBpp0086719	ENSCSAVP00000017955	T03E6.7.2	ENSCINP00000015733
901	AS_rud_dec_c10552	0.5935322	7.67E-01	0.22762099	0.7226632	0.90900236	32	0.019673469	0.040358277	0.046390023	1.461472492110260E-03	0.9695049	8.7937E-06	0.0304951	0.061882822	gene901	AS_rud_dec_c10552	PREDICTED: secreted protein-like [Saccoglossus kowalevskii]		pediculus humanus corporis small glutamine-rich tetratricopeptide repeat-containing protein mrna	sgtb_human ame: full=small glutamine-rich tetratricopeptide repeat-containing protein beta ame: full=beta-sgt ame: full=small glutamine-rich protein with tetratricopeptide repeats 2	F:binding	sp|Q96EQ0|SGTB_HUMAN	ENSDARP00000013325	ENSP00000370395	ENSXETP00000000957	ENSGACP00000020956	ENSORLP00000003525	ENSDARP00000101985	ENSTRUP00000011735	ENSTNIP00000005570	ENSBTAP00000022481	ENSMUSP00000041307	FBpp0080535	ENSCSAVP00000008596	R05F9.10	ENSCINP00000002923	ENSBTAT00000022481	2.00E-10
902	rud_dec_c10634	0.74584967	8.49E-01	0.8164226	0.62141466	0.2808463	32	0.043877551	0.036734694	0.019818594	4.814959304553660E-01	0.4877455	4.424E-06	0.5122545	0.636234519	gene902	rud_dec_c10634			paphia euglypta complete genome
904	rud_dec2_rep_c3146	0.2769078	5.42E-01	0.5003217	0.0591864	0.69713473	32	0.032267574	0.008131519	0.037641723	5.732495997108340E-04	0.9808984	8.89704E-06	0.0191016	0.122917068	gene904	rud_dec2_rep_c3146			venerupis decussatus partial srp54 gene for signal recognition particle 54-kda clone exons a-b
905	AS_rud_dec2_c717	0.049565587	2.42E-01	0.14978817	0.883878	0.014058487	32	0.015501134	0.046	0.002802721	6.776400071544230E-04	0.9792322	8.88192E-06	0.0207678	0.107982764	gene905	AS_rud_dec2_c717			venerupis decussatus partial srp54 gene for signal recognition particle 54-kda clone exons a-b
906	new_rud_dec_c16379	0.01489694	1.36E-01	0.6094806	0.002812506	0.6585396	32	0.036594104	0.001269841	0.036136054	4.737747950787360E+00	0.02950767	2.67643E-07	0.97049233	0.983880893	gene906	new_rud_dec_c16379			venerupis decussatus clone dec8 satellite sequence
909	new_rud_dec_c25219	0.13255672	3.87E-01	0.2905775	0.14604758	0.17527226	32	0.023070295	0.014281179	0.014408163	3.090590688480570E-01	0.5782582	5.24497E-06	0.4217418	0.547633392	gene909	new_rud_dec_c25219																															ENSDART00000127513	1.00E-13
910	newAS_rud_dec_c17167	0.7753458	8.67E-01	0.36132583	0.5003711	0.7362642	32	0.026512472	0.03184127	0.039210884	1.251677134177950E-03	0.9717775	8.81431E-06	0.0282225	0.067895377	gene910	newAS_rud_dec_c17167
911	rud_dec_c8795	0.2006892	4.70E-01	0.113161884	0.41408196	0.51226807	32	0.013283447	0.028126984	0.030335601	6.239305757844700E-04	0.980072	8.88954E-06	0.019928	0.114888255	gene911	rud_dec_c8795														ENSTNIP00000001433				ENSCSAVP00000016019		ENSCINP00000005541
913	rud_dec_c14079	0.03985479	2.17E-01	0.005737862	0.6456722	0.86550206	32	0.002802721	0.037646259	0.044526077	8.137136470622860E-04	0.9772429	8.86388E-06	0.0227571	0.095199815	gene913	rud_dec_c14079	hypothetical protein TRIADDRAFT_23482 [Trichoplax adhaerens]	F:nucleic acid binding, C:intracellular, F:exonuclease activity	Trichoplax adhaerens hypothetical protein. mRNA	orn_bovin ame: full= mitochondrial ame: full=rna exonuclease 2 homolog ame: full=small fragment nuclease flags: precursor	F:hydrolase activity, C:intracellular membranebounded organelle	sp|Q556Y2|ORN_DICDI	ENSDARP00000009619	ENSP00000265881	ENSXETP00000027675	ENSGACP00000026550	ENSORLP00000006457	ENSDARP00000009619	ENSTRUP00000020600	ENSTNIP00000011428	ENSBTAP00000007680	ENSMUSP00000034524	FBpp0083854		C08B6.8	ENSCINP00000019978	ENSBTAT00000007680	8.00E-15	ENST00000265881	8.00E-11	ENSXETT00000027675	2.00E-08			ENSORLT00000006458	2.00E-20
914	rud_dec_c352	0.5835442	7.61E-01	0.61896384	0.9941221	0.2928365	32	0.036975057	0.049800454	0.020312925	1.679386958812750E-03	0.9673116	8.7738E-06	0.0326884	0.057587379	gene914	rud_dec_c352	fcf1 small subunit-like		saccoglossus kowalevskii fcf1 small subunit-like mrna	fcf1_human ame: full=rrna-processing protein fcf1 homolog	C:nucleolus, P:rRNA processing	sp|Q5RFQ0|FCF1_PONAB	ENSDARP00000060649	ENSP00000344393	ENSXETP00000057007	ENSGACP00000007636	ENSORLP00000020840	ENSDARP00000060649	ENSTRUP00000039481	ENSTNIP00000020565	ENSBTAP00000027167	ENSMUSP00000131190	FBpp0079470	ENSCSAVP00000008415	F30A10.9.1	ENSCINP00000011538	ENSBTAT00000027167	2.00E-64	ENST00000341162	1.00E-75	ENSXETT00000057007	2.00E-64	ENSGACT00000007655	4.00E-60	ENSORLT00000020841	3.00E-48	ENSDART00000060650	1.00E-45
915	rud_dec_c41870	0.5489695	7.39E-01	0.21086065	0.6293815	0.85770273	32	0.018848073	0.037061224	0.044190476	1.825261661338110E-03	0.9659223	8.7612E-06	0.0340777	0.056863228	gene915	rud_dec_c41870				txca_caeex ame: full=u3-aranetoxin-ce1a short=u3-aatx-ce1a ame: full=neurotoxic peptide caeron flags: precursor	C:extracellular region, P:pathogenesis	sp|Q8MTX1|TXCA_CAEEX
918	AS_rud_dec_c24776	0.036095243	2.09E-01	0.74634665	0.008045018	0.13958831	32	0.041315193	0.002371882	0.012394558	1.486138739773130E+00	0.2228165	2.02101E-06	0.7771835	0.855406263	gene918	AS_rud_dec_c24776			spisula solidissima gene for zinc finger protein sso- complete cds
919	newAS_rud_dec_rep_c19299	0.014910221	1.35E-01	0.25204346	0.001900053	0.5512078	32	0.020988662	0.001020408	0.031927438	1.625143734703660E+00	0.2023761	1.83561E-06	0.7976239	0.869568613	gene919	newAS_rud_dec_rep_c19299			platynereis dumerilii est ib0aaa40ba12em1
921	AS_rud_dec_c19899	0.19450101	4.64E-01	0.03577633	0.427076	0.6086335	32	0.007278912	0.028634921	0.034249433	1.535381811947900E-03	0.9687437	8.78679E-06	0.0312563	0.060055464	gene921	AS_rud_dec_c19899	PREDICTED: hedgling-like [Saccoglossus kowalevskii]								ENSXETP00000029798											ENSCINP00000026095
922	rud_dec_c6130	0.46923065	6.87E-01	0.1617795	0.93812734	0.38261458	32	0.01614966	0.047891156	0.024503401	1.263018942040610E-03	0.97165	8.81315E-06	0.02835	0.067597242	gene922	rud_dec_c6130			saccoglossus kowalevskii vamp-associated protein b c-like mrna			sp|Q9Z270|VAPA_RAT	ENSDARP00000088945	ENSP00000345656	ENSXETP00000008738	ENSGACP00000022009	ENSORLP00000005154	ENSDARP00000088945	ENSTRUP00000017588	ENSTNIP00000017909	ENSBTAP00000022970	ENSMUSP00000024897	FBpp0070589			ENSCINP00000023204	ENSBTAT00000011191	9.00E-11	ENST00000463370	5.00E-10			ENSGACT00000007419	1.00E-08	ENSORLT00000004489	1.00E-08	ENSDART00000103357	2.00E-10
923	rud_dec_c6564	0.057390463	2.57E-01	0.5306967	0.007065801	0.41664666	32	0.033569161	0.002190476	0.026081633	1.945250536528070E+00	0.1630996	1.47936E-06	0.8369004	0.896952174	gene923	rud_dec_c6564																							ENST00000482540	2.00E-08
924	rud_dec_c35318	0.004513093	7.86E-02	0.001354291	0.032569632	0.018023252	32	0.001451247	0.005764172	0.003365079	1.433241267193350E-03	0.9698008	8.79638E-06	0.0301992	0.062502024	gene924	rud_dec_c35318
925	rud_dec_c28325	0.77642125	8.68E-01	0.56660676	0.73767793	0.5950316	32	0.035056689	0.040979592	0.033696145	1.782515897161820E-03	0.9663234	8.76484E-06	0.0336766	0.056813156	gene925	rud_dec_c28325	synapse-associated protein	F:protein binding	aplysia californica synapse-associated protein mrna	dlg2_danre ame: full=disks large homolog 2 ame: full=postsynaptic density protein 93 short=psd-93		sp|Q5PYH7|DLG2_DANRE	ENSDARP00000073282	ENSP00000365272	ENSXETP00000007496	ENSGACP00000026569	ENSORLP00000006888	ENSDARP00000009958	ENSTRUP00000003441	ENSTNIP00000011436	ENSBTAP00000053448	ENSMUSP00000133163	FBpp0290503	ENSCSAVP00000015687	C25F6.2a.1	ENSCINP00000009884	ENSBTAT00000061044	2.00E-11	ENST00000374355	1.00E-14	ENSXETT00000012193	1.00E-18	ENSGACT00000026620	3.00E-14	ENSORLT00000006889	4.00E-18	ENSDART00000078856	7.00E-13
927	rud_dec2_rep_c3649	0.29976836	5.62E-01	0.10951161	0.86563575	0.17498185	32	0.013011338	0.045351474	0.014390023	1.195238034142670E-03	0.9724209	8.82014E-06	0.0275791	0.070567414	gene927	rud_dec2_rep_c3649	hypothetical protein BRAFLDRAFT_271061 [Branchiostoma floridae]		tetraodon nigroviridis full-length cdna	ruxf_xenla ame: full=small nuclear ribonucleoprotein f short=snrnp-f ame: full=sm protein f short=sm-f short=	C:U7 snRNP, C:nucleoplasm, P:spliceosomal snRNP assembly, C:spliceosomal complex, F:RNA binding, F:protein binding, C:cytosol	sp|P62321|RUXF_XENLA	ENSDARP00000053128	ENSP00000266735	ENSXETP00000046743	ENSGACP00000026497	ENSORLP00000020796	ENSDARP00000053772	ENSTRUP00000038228	ENSTNIP00000015646	ENSBTAP00000021643	ENSMUSP00000020203	FBpp0087118	ENSCSAVP00000012767	ZK652.1.1		ENSBTAT00000021643	1.00E-48	ENST00000266735	2.00E-48			ENSGACT00000026548	9.00E-44	ENSORLT00000020797	6.00E-51	ENSDART00000053129	5.00E-50
928	rud_dec2_c33	0.022405574	1.66E-01	0.030567143	0.5935918	0.02401068	32	0.006675737	0.035759637	0.004054422	2.492516685707640E-01	0.6176025	5.60184E-06	0.3823975	0.506996349	gene928	rud_dec2_c33	PREDICTED: hypothetical protein LOC100543846 [Meleagris gallopavo]		hottentotta judaicus clone hj0022 transcription factor xbp-1 partial cds						ENSXETP00000057183							ENSMUSP00000105492
930	new_rud_dec_c39730	0.56435436	7.48E-01	0.67802024	0.1922271	0.9950739	32	0.039011338	0.017043084	0.049768707	5.798954980491540E-04	0.980788	8.89604E-06	0.019212	0.122059871	gene930	new_rud_dec_c39730			venerupis decussatus partial srp54 gene for signal recognition particle 54-kda clone exons a-b
933	AS_rud_dec_rep_c22075	0.45781803	6.80E-01	0.16865703	0.2758202	0.5169287	32	0.016471655	0.021487528	0.030521542	1.451977449505640E-03	0.9696041	8.7946E-06	0.0303959	0.062047038	gene933	AS_rud_dec_rep_c22075			venerupis decussatus partial srp54 gene for signal recognition particle 54-kda clone exons a-b
934	new_rud_dec_rep_c25672	0.090427786	3.24E-01	0.41797784	0.32232675	0.012224093	32	0.02892517	0.023723356	0.002512472	1.051572841680920E+00	0.3051451	2.76776E-06	0.6948549	0.792404879	gene934	new_rud_dec_rep_c25672			spisula solidissima complete sequence
935	rud_dec2_c1097	0.9946222	9.97E-01	0.9941752	0.7944722	0.91824484	32	0.04984127	0.042993197	0.046748299	2.230966280762910E-03	0.9623274	8.72859E-06	0.0376726	0.06116734	gene935	rud_dec2_c1097	connectin titin-like			kalrn_rat ame: full=kalirin ame: full=huntingtin-associated protein-interacting protein ame: full=pam cooh-terminal interactor protein 10 short=p-cip10 ame: full=protein duo ame: full=serine threonine-protein kinase with dbl- and pleckstrin homology domain	F:binding	sp|P97924|KALRN_RAT	ENSDARP00000103989	ENSP00000357129	ENSXETP00000034450	ENSGACP00000011154	ENSORLP00000022804	ENSDARP00000081489	ENSTRUP00000031860	ENSTNIP00000022321	ENSBTAP00000032241	ENSMUSP00000110619	FBpp0110155	ENSCSAVP00000002128	F21C10.7
936	rud_dec_c29596	0.026103979	1.79E-01	0.74342006	0.075885154	0.07717879	32	0.041147392	0.009451247	0.008621315	2.133345965070530E+00	0.1441258	1.30726E-06	0.8558742	0.91038322	gene936	rud_dec_c29596	hypothetical protein EAI_07006 [Harpegnathos saltator]
938	rud_dec_c3190	0.6328519	7.86E-01	0.40375808	0.29332772	0.3654613	32	0.028408163	0.022408163	0.02369161	1.032020136108250E-03	0.9743723	8.83784E-06	0.0256277	0.078975157	gene938	rud_dec_c3190	novel protein human and mouse caseinolytic atp- proteolytic subunit homolog ( coli)	F:serinetype peptidase activity, P:proteolysis	strongylocentrotus purpuratus loc496087 protein mrna	clpp_human ame: full= atp-dependent clp protease proteolytic mitochondrial ame: full=endopeptidase clp flags: precursor	F:serinetype endopeptidase activity, F:protein binding, C:mitochondrial matrix, F:ATP binding, P:proteolysis	sp|Q16740|CLPP_HUMAN	ENSDARP00000013890	ENSP00000245816	ENSXETP00000012276	ENSGACP00000007293	ENSORLP00000021659	ENSDARP00000013890	ENSTRUP00000031952	ENSTNIP00000017015	ENSBTAP00000019577	ENSMUSP00000002735	FBpp0079590	ENSCSAVP00000013661	ZK970.2a	ENSCINP00000009302	ENSBTAT00000019577	7.00E-33			ENSXETT00000012276	3.00E-24	ENSGACT00000007311	1.00E-30			ENSDART00000136900	2.00E-30
939	rud_dec_c19258	0.61597234	7.78E-01	0.9066297	0.25896063	0.8137849	32	0.046875283	0.020612245	0.042535147	2.559421865271360E-03	0.9596517	8.70432E-06	0.0403483	0.065252246	gene939	rud_dec_c19258	si:ch211- protein			ifi44_mouse ame: full=interferon-induced protein 44 ame: full=microtubule-associated protein 44	F:molecular_function, P:biological_process, C:cellular_component	sp|Q8BV66|IFI44_MOUSE	ENSDARP00000125020	ENSP00000359783		ENSGACP00000010553	ENSORLP00000010800	ENSDARP00000096226	ENSTRUP00000041124	ENSTNIP00000013083	ENSBTAP00000031029	ENSMUSP00000029671		ENSCSAVP00000018910		ENSCINP00000019144
942	AS_rud_dec_c34618	0.67802465	8.11E-01	0.46999756	0.98302615	0.2965191	32	0.031097506	0.049464853	0.020453515	1.427345850856900E-03	0.9698629	8.79694E-06	0.0301371	0.062679482	gene942	AS_rud_dec_c34618									ENSXETP00000034633
944	AS_rud_dec2_c1356	0.3371147	5.91E-01	0.29488876	0.68224674	0.31680143	32	0.023247166	0.038988662	0.021460317	1.211036411405070E-03	0.9722393	8.8185E-06	0.0277607	0.069848481	gene944	AS_rud_dec2_c1356	c1q domain containing protein 1q41			c1ql2_human ame: full=complement c1q-like protein 2 flags: precursor	C:extracellular region	sp|Q8CFR0|C1QL2_MOUSE	ENSDARP00000121947	ENSP00000272520	ENSXETP00000024449	ENSGACP00000019735	ENSORLP00000022163	ENSDARP00000096302	ENSTRUP00000003096	ENSTNIP00000022255	ENSBTAP00000047342	ENSMUSP00000037257
945	rud_dec_c3033	0.4077242	6.49E-01	0.09841657	0.7817751	0.46258676	32	0.01215873	0.042530612	0.028045351	9.570594511387750E-04	0.9753203	8.84644E-06	0.0246797	0.083990223	gene945	rud_dec_c3033			venerupis decussatus partial srp54 gene for signal recognition particle 54-kda clone exons a-b
946	rud_dec_c3939	0.24157943	5.10E-01	0.8425613	0.9805317	0.05914318	32	0.044829932	0.049333333	0.007301587	4.586201728096170E-01	0.4982695	4.51945E-06	0.5017305	0.626055615	gene946	rud_dec_c3939							ENSDARP00000099488	ENSP00000431150	ENSXETP00000047298	ENSGACP00000017895	ENSORLP00000014878	ENSDARP00000006694	ENSTRUP00000007183		ENSBTAP00000035502	ENSMUSP00000048470
948	AS_rud_dec_c40119	0.024273895	1.73E-01	0.75329673	0.28375483	0.021283897	32	0.041600907	0.021927438	0.003777778	6.120440998529370E-04	0.9802627	8.89127E-06	0.0197373	0.116844392	gene948	AS_rud_dec_c40119	adp-ribosylation factor isoform cra_a	F:GTP binding, C:Golgi apparatus, F:protein binding, P:vesiclemediated transport, P:small GTPase mediated signal transduction, P:protein transport	saccoglossus kowalevskii adp-ribosylation factor-like mrna	arf2_rat ame: full=adp-ribosylation factor 2	F:GTP binding, C:Golgi apparatus, F:protein binding, P:vesiclemediated transport, P:small GTPase mediated signal transduction, P:protein transport	sp|P84082|ARF2_RAT	ENSDARP00000123806	ENSP00000272102	ENSXETP00000031193	ENSGACP00000005741	ENSORLP00000017696	ENSDARP00000015805	ENSTRUP00000036767	ENSTNIP00000014636	ENSBTAP00000008925	ENSMUSP00000102622	FBpp0289185	ENSCSAVP00000011937	B0336.2.4										ENSORLT00000020188	3.00E-11
949	rud_dec_c5778	0.058967255	2.60E-01	0.6615083	0.026253283	0.027537199	32	0.038408163	0.005015873	0.004462585	1.140006999296470E-01	0.7356346	6.67242E-06	0.2643654	0.372837744	gene949	rud_dec_c5778	glutathione s-transferase c	F:transferase activity	venerupis philippinarum glutathione s-transferase c complete cds	gsta_plepl ame: full=glutathione s-transferase a short=gst-a ame: full=gst class-theta	F:transferase activity	sp|P30568|GSTA_PLEPL	ENSDARP00000062517	ENSP00000385765		ENSGACP00000010000	ENSORLP00000017200	ENSDARP00000062517	ENSTRUP00000037869	ENSTNIP00000012096			FBpp0072341	ENSCSAVP00000011456		ENSCINP00000022773
951	rud_dec_c9839	0.35969234	6.11E-01	0.17191611	0.83608174	0.22816913	32	0.016698413	0.044285714	0.017124717	6.866149520874380E-04	0.9790952	8.88068E-06	0.0209048	0.107078815	gene951	rud_dec_c9839	hydroxyacyl-coenzyme a type isoform cra_c	P:lipid metabolic process, C:mitochondrion, F:3hydroxy2methylbutyrylCoA dehydrogenase activity, P:Leydig cell differentiation, P:oxidation reduction, P:tRNA processing, F:acetoacetylCoA reductase activity, F:identical protein binding, F:betaamyloid binding, F:steroid binding, P:cell aging, F:NAD or NADH binding, F:3hydroxyacylCoA dehydrogenase activity, F:estradiol 17betadehydrogenase activity, P…	lysiphlebus testaceipes 3-hydroxyacyl- dehydrogenase complete cds	hcd2_mouse ame: full=3-hydroxyacyl- dehydrogenase type-2 ame: full=17-beta-hydroxysteroid dehydrogenase 10 short=17-beta-hsd 10 ame: full=3-hydroxy-2-methylbutyryl- dehydrogenase ame: full=3-hydroxyacyl- dehydrogenase type ii ame: full=endoplasmic reticulum-associated amyloid beta-peptide-binding protein ame: full=mitochondrial ribonuclease p protein 2 short=mitochondrial rnase p protein 2 ame: f…		sp|O08756|HCD2_MOUSE	ENSDARP00000017597	ENSP00000168216	ENSXETP00000016841	ENSGACP00000013951	ENSORLP00000020907	ENSDARP00000017597	ENSTRUP00000045263	ENSTNIP00000015374	ENSBTAP00000023642	ENSMUSP00000108236	FBpp0074285	ENSCSAVP00000010467	F01G4.2.2						ENSXETT00000016841	2.00E-06
953	AS_rud_dec_c9486	0.19269484	4.62E-01	0.5875924	0.18368548	0.10206642	32	0.035791383	0.016594104	0.010190476	4.358599259717260E-04	0.9833436	8.91922E-06	0.0166564	0.147591236	gene953	AS_rud_dec_c9486			Trichoplax adhaerens hypothetical protein. mRNA
955	AS_rud_dec_c7347	0.28744575	5.53E-01	0.40841135	0.9688852	0.074591644	32	0.028589569	0.048984127	0.008480726	1.251576511265280E-03	0.9717786	8.81432E-06	0.0282214	0.067922378	gene955	AS_rud_dec_c7347	hypothetical protein AND_11013 [Anopheles darlingi]
[truncated: 10,312 more rows]
[truncated: 18 more columns]
